# Supplementary material for: Aging-Related Impairments to M Cells in Peyer’s Patches Coincide With Disturbances to Paneth Cells
Source: Front Immunol. 2021 Dec 6;12:761949. doi: 10.3389/fimmu.2021.761949 (PMC8687451; doi:10.3389/fimmu.2021.761949)
Supplement: Supplementary Table 1 — Contents of the genes all the co-expressed gene clusters derived from the analysis in this study. Cluster functional enrichment analysis at Pearson r = 0.93, MCL 2.2. [file Table_1.xlsx]

## Sheet: Sheet1
Name	gene_id	source	gene_version	gene_name	gene_biotype	MCL_2.2_6
1810041L15Rik:ENSMUSG00000062760	ENSMUSG00000062760	10	ensembl_havana	1810041L15Rik	protein_coding	Cluster0001
2610305D13Rik:ENSMUSG00000066000	ENSMUSG00000066000	12	ensembl_havana	2610305D13Rik	protein_coding	Cluster0001
2810032G03Rik:ENSMUSG00000037735	ENSMUSG00000037735	7	ensembl_havana	2810032G03Rik	lincRNA	Cluster0001
2900011O08Rik:ENSMUSG00000044117	ENSMUSG00000044117	12	ensembl_havana	2900011O08Rik	protein_coding	Cluster0001
37865:ENSMUSG00000022456	ENSMUSG00000022456	15	ensembl	2003-09-01	protein_coding	Cluster0001
38231:ENSMUSG00000020486	ENSMUSG00000020486	18	ensembl_havana	2004-09-01	protein_coding	Cluster0001
4833412C05Rik:ENSMUSG00000097697	ENSMUSG00000097697	2	havana	4833412C05Rik	lincRNA	Cluster0001
4930578C19Rik:ENSMUSG00000037358	ENSMUSG00000037358	6	ensembl_havana	4930578C19Rik	protein_coding	Cluster0001
4933407E24Rik:ENSMUSG00000073759	ENSMUSG00000073759	6	ensembl_havana	4933407E24Rik	lincRNA	Cluster0001
5033428I22Rik:ENSMUSG00000097910	ENSMUSG00000097910	1	ensembl	5033428I22Rik	lincRNA	Cluster0001
5730409E04Rik:ENSMUSG00000073755	ENSMUSG00000073755	4	ensembl_havana	5730409E04Rik	protein_coding	Cluster0001
6330403A02Rik:ENSMUSG00000053963	ENSMUSG00000053963	6	ensembl_havana	6330403A02Rik	protein_coding	Cluster0001
6330403K07Rik:ENSMUSG00000018451	ENSMUSG00000018451	6	ensembl_havana	6330403K07Rik	lincRNA	Cluster0001
6330403L08Rik:ENSMUSG00000075585	ENSMUSG00000075585	3	ensembl_havana	6330403L08Rik	antisense	Cluster0001
9330132A10Rik:ENSMUSG00000043498	ENSMUSG00000043498	3	ensembl	9330132A10Rik	pseudogene	Cluster0001
9330159F19Rik:ENSMUSG00000004360	ENSMUSG00000004360	8	ensembl	9330159F19Rik	protein_coding	Cluster0001
9330182L06Rik:ENSMUSG00000056004	ENSMUSG00000056004	16	ensembl_havana	9330182L06Rik	protein_coding	Cluster0001
9430020K01Rik:ENSMUSG00000033960	ENSMUSG00000033960	5	ensembl	9430020K01Rik	protein_coding	Cluster0001
9530026P05Rik:ENSMUSG00000097462	ENSMUSG00000097462	7	havana	9530026P05Rik	antisense	Cluster0001
9530052C20Rik:ENSMUSG00000097858	ENSMUSG00000097858	2	havana	9530052C20Rik	lincRNA	Cluster0001
9530077C05Rik:ENSMUSG00000036411	ENSMUSG00000036411	9	ensembl	9530077C05Rik	protein_coding	Cluster0001
A330074K22Rik:ENSMUSG00000097960	ENSMUSG00000097960	1	havana	A330074K22Rik	lincRNA	Cluster0001
A430105I19Rik:ENSMUSG00000045838	ENSMUSG00000045838	8	ensembl_havana	A430105I19Rik	protein_coding	Cluster0001
A4galt:ENSMUSG00000047878	ENSMUSG00000047878	12	ensembl	A4galt	protein_coding	Cluster0001
A730020M07Rik:ENSMUSG00000044522	ENSMUSG00000044522	8	ensembl_havana	A730020M07Rik	lincRNA	Cluster0001
A830039N20Rik:ENSMUSG00000071567	ENSMUSG00000071567	6	havana	A830039N20Rik	lincRNA	Cluster0001
A930004D18Rik:ENSMUSG00000054057	ENSMUSG00000054057	2	ensembl_havana	A930004D18Rik	protein_coding	Cluster0001
Aass:ENSMUSG00000029695	ENSMUSG00000029695	13	ensembl_havana	Aass	protein_coding	Cluster0001
Aatk:ENSMUSG00000025375	ENSMUSG00000025375	15	ensembl_havana	Aatk	protein_coding	Cluster0001
Abca8a:ENSMUSG00000041828	ENSMUSG00000041828	15	ensembl_havana	Abca8a	protein_coding	Cluster0001
Abca9:ENSMUSG00000041797	ENSMUSG00000041797	7	ensembl_havana	Abca9	protein_coding	Cluster0001
Abcc9:ENSMUSG00000030249	ENSMUSG00000030249	15	ensembl_havana	Abcc9	protein_coding	Cluster0001
Abcg4:ENSMUSG00000032131	ENSMUSG00000032131	15	ensembl_havana	Abcg4	protein_coding	Cluster0001
Ablim2:ENSMUSG00000029095	ENSMUSG00000029095	17	ensembl_havana	Ablim2	protein_coding	Cluster0001
Ablim3:ENSMUSG00000032735	ENSMUSG00000032735	14	ensembl	Ablim3	protein_coding	Cluster0001
Ackr1:ENSMUSG00000037872	ENSMUSG00000037872	5	ensembl_havana	Ackr1	protein_coding	Cluster0001
Ackr3:ENSMUSG00000044337	ENSMUSG00000044337	5	ensembl_havana	Ackr3	protein_coding	Cluster0001
Ackr4:ENSMUSG00000079355	ENSMUSG00000079355	3	ensembl_havana	Ackr4	protein_coding	Cluster0001
Acta2:ENSMUSG00000035783	ENSMUSG00000035783	8	ensembl	Acta2	protein_coding	Cluster0001
Actg2:ENSMUSG00000059430	ENSMUSG00000059430	14	ensembl_havana	Actg2	protein_coding	Cluster0001
Acvrl1:ENSMUSG00000000530	ENSMUSG00000000530	16	ensembl_havana	Acvrl1	protein_coding	Cluster0001
Adam11:ENSMUSG00000020926	ENSMUSG00000020926	16	ensembl_havana	Adam11	protein_coding	Cluster0001
Adam22:ENSMUSG00000040537	ENSMUSG00000040537	17	ensembl_havana	Adam22	protein_coding	Cluster0001
Adamdec1:ENSMUSG00000022057	ENSMUSG00000022057	7	ensembl	Adamdec1	protein_coding	Cluster0001
Adamts1:ENSMUSG00000022893	ENSMUSG00000022893	14	ensembl_havana	Adamts1	protein_coding	Cluster0001
Adamts18:ENSMUSG00000053399	ENSMUSG00000053399	8	ensembl	Adamts18	protein_coding	Cluster0001
Adamts4:ENSMUSG00000006403	ENSMUSG00000006403	12	ensembl_havana	Adamts4	protein_coding	Cluster0001
Adamts7:ENSMUSG00000032363	ENSMUSG00000032363	15	ensembl_havana	Adamts7	protein_coding	Cluster0001
Adamts8:ENSMUSG00000031994	ENSMUSG00000031994	13	ensembl_havana	Adamts8	protein_coding	Cluster0001
Adamtsl1:ENSMUSG00000066113	ENSMUSG00000066113	15	ensembl_havana	Adamtsl1	protein_coding	Cluster0001
Adamtsl3:ENSMUSG00000070469	ENSMUSG00000070469	12	ensembl_havana	Adamtsl3	protein_coding	Cluster0001
Adamtsl4:ENSMUSG00000015850	ENSMUSG00000015850	11	ensembl_havana	Adamtsl4	protein_coding	Cluster0001
Adarb1:ENSMUSG00000020262	ENSMUSG00000020262	15	ensembl_havana	Adarb1	protein_coding	Cluster0001
Adcy1:ENSMUSG00000020431	ENSMUSG00000020431	5	ensembl_havana	Adcy1	protein_coding	Cluster0001
Adcy5:ENSMUSG00000022840	ENSMUSG00000022840	8	ensembl	Adcy5	protein_coding	Cluster0001
Adcyap1:ENSMUSG00000024256	ENSMUSG00000024256	6	ensembl	Adcyap1	protein_coding	Cluster0001
Adcyap1r1:ENSMUSG00000029778	ENSMUSG00000029778	12	ensembl_havana	Adcyap1r1	protein_coding	Cluster0001
Adgra2:ENSMUSG00000031486	ENSMUSG00000031486	14	ensembl_havana	Adgra2	protein_coding	Cluster0001
Adgrb2:ENSMUSG00000028782	ENSMUSG00000028782	14	ensembl_havana	Adgrb2	protein_coding	Cluster0001
Adgre1:ENSMUSG00000004730	ENSMUSG00000004730	14	ensembl	Adgre1	protein_coding	Cluster0001
Adgrf5:ENSMUSG00000056492	ENSMUSG00000056492	5	ensembl	Adgrf5	protein_coding	Cluster0001
Adgrg3:ENSMUSG00000060470	ENSMUSG00000060470	6	ensembl	Adgrg3	protein_coding	Cluster0001
Adgrg6:ENSMUSG00000039116	ENSMUSG00000039116	5	ensembl_havana	Adgrg6	protein_coding	Cluster0001
Adgrl1:ENSMUSG00000013033	ENSMUSG00000013033	16	ensembl_havana	Adgrl1	protein_coding	Cluster0001
Adgrl3:ENSMUSG00000037605	ENSMUSG00000037605	16	ensembl_havana	Adgrl3	protein_coding	Cluster0001
Adgrl4:ENSMUSG00000039167	ENSMUSG00000039167	11	ensembl_havana	Adgrl4	protein_coding	Cluster0001
Adra2b:ENSMUSG00000058620	ENSMUSG00000058620	5	ensembl_havana	Adra2b	protein_coding	Cluster0001
Adra2c:ENSMUSG00000045318	ENSMUSG00000045318	6	ensembl_havana	Adra2c	protein_coding	Cluster0001
Aebp1:ENSMUSG00000020473	ENSMUSG00000020473	13	ensembl_havana	Aebp1	protein_coding	Cluster0001
Afap1l2:ENSMUSG00000025083	ENSMUSG00000025083	17	ensembl_havana	Afap1l2	protein_coding	Cluster0001
Agtr1a:ENSMUSG00000049115	ENSMUSG00000049115	14	ensembl_havana	Agtr1a	protein_coding	Cluster0001
Ahi1:ENSMUSG00000019986	ENSMUSG00000019986	16	ensembl	Ahi1	protein_coding	Cluster0001
Ahrr:ENSMUSG00000021575	ENSMUSG00000021575	15	ensembl_havana	Ahrr	protein_coding	Cluster0001
AI607873:ENSMUSG00000073490	ENSMUSG00000073490	10	ensembl_havana	AI607873	protein_coding	Cluster0001
Ak4:ENSMUSG00000028527	ENSMUSG00000028527	18	ensembl_havana	Ak4	protein_coding	Cluster0001
Akap12:ENSMUSG00000038587	ENSMUSG00000038587	8	ensembl	Akap12	protein_coding	Cluster0001
Akap6:ENSMUSG00000061603	ENSMUSG00000061603	7	ensembl	Akap6	protein_coding	Cluster0001
Aldh1a3:ENSMUSG00000015134	ENSMUSG00000015134	15	ensembl_havana	Aldh1a3	protein_coding	Cluster0001
Aldh7a1:ENSMUSG00000053644	ENSMUSG00000053644	13	ensembl_havana	Aldh7a1	protein_coding	Cluster0001
Amigo1:ENSMUSG00000050947	ENSMUSG00000050947	9	ensembl_havana	Amigo1	protein_coding	Cluster0001
Amotl1:ENSMUSG00000013076	ENSMUSG00000013076	15	ensembl_havana	Amotl1	protein_coding	Cluster0001
Angpt1:ENSMUSG00000022309	ENSMUSG00000022309	8	ensembl	Angpt1	protein_coding	Cluster0001
Angptl1:ENSMUSG00000033544	ENSMUSG00000033544	6	ensembl_havana	Angptl1	protein_coding	Cluster0001
Angptl2:ENSMUSG00000004105	ENSMUSG00000004105	8	ensembl_havana	Angptl2	protein_coding	Cluster0001
Ank1:ENSMUSG00000031543	ENSMUSG00000031543	18	ensembl_havana	Ank1	protein_coding	Cluster0001
Ank2:ENSMUSG00000032826	ENSMUSG00000032826	16	ensembl_havana	Ank2	protein_coding	Cluster0001
Ankrd34a:ENSMUSG00000049097	ENSMUSG00000049097	9	ensembl_havana	Ankrd34a	protein_coding	Cluster0001
Ankrd63:ENSMUSG00000078137	ENSMUSG00000078137	1	ensembl_havana	Ankrd63	protein_coding	Cluster0001
Ano2:ENSMUSG00000038115	ENSMUSG00000038115	16	ensembl_havana	Ano2	protein_coding	Cluster0001
Antxr1:ENSMUSG00000033420	ENSMUSG00000033420	12	ensembl_havana	Antxr1	protein_coding	Cluster0001
Anxa1:ENSMUSG00000024659	ENSMUSG00000024659	14	ensembl_havana	Anxa1	protein_coding	Cluster0001
Aoah:ENSMUSG00000021322	ENSMUSG00000021322	7	ensembl	Aoah	protein_coding	Cluster0001
Aoc3:ENSMUSG00000019326	ENSMUSG00000019326	14	ensembl_havana	Aoc3	protein_coding	Cluster0001
Aox1:ENSMUSG00000063558	ENSMUSG00000063558	4	ensembl_havana	Aox1	protein_coding	Cluster0001
Ap3b2:ENSMUSG00000062444	ENSMUSG00000062444	14	ensembl_havana	Ap3b2	protein_coding	Cluster0001
Apba1:ENSMUSG00000024897	ENSMUSG00000024897	8	ensembl	Apba1	protein_coding	Cluster0001
Apbb1:ENSMUSG00000037032	ENSMUSG00000037032	15	ensembl_havana	Apbb1	protein_coding	Cluster0001
Apc2:ENSMUSG00000020135	ENSMUSG00000020135	13	ensembl_havana	Apc2	protein_coding	Cluster0001
Aph1c:ENSMUSG00000053040	ENSMUSG00000053040	13	ensembl_havana	Aph1c	protein_coding	Cluster0001
Apln:ENSMUSG00000037010	ENSMUSG00000037010	7	ensembl_havana	Apln	protein_coding	Cluster0001
Aplnr:ENSMUSG00000044338	ENSMUSG00000044338	9	ensembl_havana	Aplnr	protein_coding	Cluster0001
Apod:ENSMUSG00000022548	ENSMUSG00000022548	14	ensembl_havana	Apod	protein_coding	Cluster0001
Apol10b:ENSMUSG00000050014	ENSMUSG00000050014	7	ensembl_havana	Apol10b	protein_coding	Cluster0001
Apol7c:ENSMUSG00000044309	ENSMUSG00000044309	7	ensembl	Apol7c	protein_coding	Cluster0001
Apold1:ENSMUSG00000090698	ENSMUSG00000090698	2	ensembl_havana	Apold1	protein_coding	Cluster0001
Arhgap20:ENSMUSG00000053199	ENSMUSG00000053199	13	ensembl_havana	Arhgap20	protein_coding	Cluster0001
Arhgap23:ENSMUSG00000049807	ENSMUSG00000049807	16	ensembl_havana	Arhgap23	protein_coding	Cluster0001
Arhgap44:ENSMUSG00000033389	ENSMUSG00000033389	16	ensembl_havana	Arhgap44	protein_coding	Cluster0001
Arhgap6:ENSMUSG00000031355	ENSMUSG00000031355	16	ensembl_havana	Arhgap6	protein_coding	Cluster0001
Arhgef15:ENSMUSG00000052921	ENSMUSG00000052921	13	ensembl_havana	Arhgef15	protein_coding	Cluster0001
Arhgef17:ENSMUSG00000032875	ENSMUSG00000032875	8	ensembl_havana	Arhgef17	protein_coding	Cluster0001
Arhgef25:ENSMUSG00000019467	ENSMUSG00000019467	13	ensembl	Arhgef25	protein_coding	Cluster0001
Arhgef9:ENSMUSG00000025656	ENSMUSG00000025656	17	ensembl_havana	Arhgef9	protein_coding	Cluster0001
Armcx1:ENSMUSG00000033460	ENSMUSG00000033460	14	ensembl_havana	Armcx1	protein_coding	Cluster0001
Armcx3:ENSMUSG00000049047	ENSMUSG00000049047	11	ensembl_havana	Armcx3	protein_coding	Cluster0001
Armcx4:ENSMUSG00000049804	ENSMUSG00000049804	9	ensembl_havana	Armcx4	protein_coding	Cluster0001
Arsi:ENSMUSG00000036412	ENSMUSG00000036412	5	ensembl_havana	Arsi	protein_coding	Cluster0001
Art3:ENSMUSG00000034842	ENSMUSG00000034842	16	ensembl_havana	Art3	protein_coding	Cluster0001
Artn:ENSMUSG00000028539	ENSMUSG00000028539	14	ensembl_havana	Artn	protein_coding	Cluster0001
Arvcf:ENSMUSG00000000325	ENSMUSG00000000325	15	ensembl_havana	Arvcf	protein_coding	Cluster0001
Arxes1:ENSMUSG00000048355	ENSMUSG00000048355	2	ensembl_havana	Arxes1	protein_coding	Cluster0001
Asic2:ENSMUSG00000020704	ENSMUSG00000020704	13	ensembl_havana	Asic2	protein_coding	Cluster0001
Asic4:ENSMUSG00000033007	ENSMUSG00000033007	15	ensembl_havana	Asic4	protein_coding	Cluster0001
Asphd2:ENSMUSG00000029348	ENSMUSG00000029348	11	ensembl_havana	Asphd2	protein_coding	Cluster0001
Aspn:ENSMUSG00000021388	ENSMUSG00000021388	13	ensembl	Aspn	protein_coding	Cluster0001
Astn1:ENSMUSG00000026587	ENSMUSG00000026587	15	ensembl_havana	Astn1	protein_coding	Cluster0001
Astn2:ENSMUSG00000028373	ENSMUSG00000028373	16	ensembl_havana	Astn2	protein_coding	Cluster0001
Atcayos:ENSMUSG00000085779	ENSMUSG00000085779	1	havana	Atcayos	antisense	Cluster0001
Atl1:ENSMUSG00000021066	ENSMUSG00000021066	8	ensembl	Atl1	protein_coding	Cluster0001
Atoh8:ENSMUSG00000037621	ENSMUSG00000037621	8	ensembl_havana	Atoh8	protein_coding	Cluster0001
Atp10a:ENSMUSG00000025324	ENSMUSG00000025324	8	ensembl_havana	Atp10a	protein_coding	Cluster0001
Atp1a2:ENSMUSG00000007097	ENSMUSG00000007097	14	ensembl_havana	Atp1a2	protein_coding	Cluster0001
Atp1b2:ENSMUSG00000041329	ENSMUSG00000041329	13	ensembl_havana	Atp1b2	protein_coding	Cluster0001
Atp2b3:ENSMUSG00000031376	ENSMUSG00000031376	15	ensembl_havana	Atp2b3	protein_coding	Cluster0001
Atp2b4:ENSMUSG00000026463	ENSMUSG00000026463	17	ensembl_havana	Atp2b4	protein_coding	Cluster0001
AW551984:ENSMUSG00000038112	ENSMUSG00000038112	15	ensembl_havana	AW551984	protein_coding	Cluster0001
Axl:ENSMUSG00000002602	ENSMUSG00000002602	16	ensembl_havana	Axl	protein_coding	Cluster0001
B230312C02Rik:ENSMUSG00000084843	ENSMUSG00000084843	1	havana	B230312C02Rik	lincRNA	Cluster0001
B3galnt1:ENSMUSG00000043300	ENSMUSG00000043300	2	ensembl_havana	B3galnt1	protein_coding	Cluster0001
B3galt1:ENSMUSG00000034780	ENSMUSG00000034780	6	ensembl_havana	B3galt1	protein_coding	Cluster0001
B3gnt9:ENSMUSG00000069920	ENSMUSG00000069920	10	ensembl_havana	B3gnt9	protein_coding	Cluster0001
B4galt2:ENSMUSG00000028541	ENSMUSG00000028541	14	ensembl_havana	B4galt2	protein_coding	Cluster0001
Bace1:ENSMUSG00000032086	ENSMUSG00000032086	12	ensembl_havana	Bace1	protein_coding	Cluster0001
Bag2:ENSMUSG00000042215	ENSMUSG00000042215	8	ensembl_havana	Bag2	protein_coding	Cluster0001
Bbs1:ENSMUSG00000006464	ENSMUSG00000006464	8	ensembl	Bbs1	protein_coding	Cluster0001
Bbs7:ENSMUSG00000037325	ENSMUSG00000037325	10	ensembl_havana	Bbs7	protein_coding	Cluster0001
BC034090:ENSMUSG00000033722	ENSMUSG00000033722	9	ensembl_havana	BC034090	protein_coding	Cluster0001
Bcl6b:ENSMUSG00000000317	ENSMUSG00000000317	11	ensembl_havana	Bcl6b	protein_coding	Cluster0001
Bdkrb2:ENSMUSG00000021070	ENSMUSG00000021070	5	ensembl	Bdkrb2	protein_coding	Cluster0001
Bean1:ENSMUSG00000031872	ENSMUSG00000031872	13	ensembl	Bean1	protein_coding	Cluster0001
Bend6:ENSMUSG00000042182	ENSMUSG00000042182	16	ensembl_havana	Bend6	protein_coding	Cluster0001
Bex2:ENSMUSG00000042750	ENSMUSG00000042750	7	ensembl_havana	Bex2	protein_coding	Cluster0001
Bgn:ENSMUSG00000031375	ENSMUSG00000031375	17	ensembl_havana	Bgn	protein_coding	Cluster0001
Bmp4:ENSMUSG00000021835	ENSMUSG00000021835	14	ensembl_havana	Bmp4	protein_coding	Cluster0001
Bmp5:ENSMUSG00000032179	ENSMUSG00000032179	7	ensembl_havana	Bmp5	protein_coding	Cluster0001
Bmper:ENSMUSG00000031963	ENSMUSG00000031963	7	ensembl	Bmper	protein_coding	Cluster0001
Bnc2:ENSMUSG00000028487	ENSMUSG00000028487	18	ensembl_havana	Bnc2	protein_coding	Cluster0001
Boc:ENSMUSG00000022687	ENSMUSG00000022687	11	ensembl_havana	Boc	protein_coding	Cluster0001
Brsk1:ENSMUSG00000035390	ENSMUSG00000035390	16	ensembl_havana	Brsk1	protein_coding	Cluster0001
Brsk2:ENSMUSG00000053046	ENSMUSG00000053046	14	ensembl_havana	Brsk2	protein_coding	Cluster0001
Bves:ENSMUSG00000071317	ENSMUSG00000071317	3	ensembl	Bves	protein_coding	Cluster0001
C1qtnf2:ENSMUSG00000046491	ENSMUSG00000046491	10	ensembl_havana	C1qtnf2	protein_coding	Cluster0001
C1qtnf3:ENSMUSG00000058914	ENSMUSG00000058914	12	ensembl_havana	C1qtnf3	protein_coding	Cluster0001
C1qtnf7:ENSMUSG00000061535	ENSMUSG00000061535	11	ensembl_havana	C1qtnf7	protein_coding	Cluster0001
C1qtnf9:ENSMUSG00000071347	ENSMUSG00000071347	3	ensembl_havana	C1qtnf9	protein_coding	Cluster0001
C1ra:ENSMUSG00000055172	ENSMUSG00000055172	10	ensembl_havana	C1ra	protein_coding	Cluster0001
C1rl:ENSMUSG00000038527	ENSMUSG00000038527	9	ensembl_havana	C1rl	protein_coding	Cluster0001
C1s1:ENSMUSG00000038521	ENSMUSG00000038521	17	ensembl_havana	C1s1	protein_coding	Cluster0001
C3ar1:ENSMUSG00000040552	ENSMUSG00000040552	8	ensembl_havana	C3ar1	protein_coding	Cluster0001
C5ar1:ENSMUSG00000049130	ENSMUSG00000049130	5	ensembl	C5ar1	protein_coding	Cluster0001
C6:ENSMUSG00000022181	ENSMUSG00000022181	15	ensembl_havana	C6	protein_coding	Cluster0001
C7:ENSMUSG00000079105	ENSMUSG00000079105	3	ensembl	C7	protein_coding	Cluster0001
Cacna1b:ENSMUSG00000004113	ENSMUSG00000004113	18	ensembl_havana	Cacna1b	protein_coding	Cluster0001
Cacna1c:ENSMUSG00000051331	ENSMUSG00000051331	14	ensembl_havana	Cacna1c	protein_coding	Cluster0001
Cacna1g:ENSMUSG00000020866	ENSMUSG00000020866	17	ensembl_havana	Cacna1g	protein_coding	Cluster0001
Cacna1h:ENSMUSG00000024112	ENSMUSG00000024112	16	ensembl_havana	Cacna1h	protein_coding	Cluster0001
Cacna2d3:ENSMUSG00000021991	ENSMUSG00000021991	8	ensembl_havana	Cacna2d3	protein_coding	Cluster0001
Cacnb1:ENSMUSG00000020882	ENSMUSG00000020882	17	ensembl_havana	Cacnb1	protein_coding	Cluster0001
Cacnb2:ENSMUSG00000057914	ENSMUSG00000057914	15	ensembl_havana	Cacnb2	protein_coding	Cluster0001
Cacng4:ENSMUSG00000020723	ENSMUSG00000020723	3	ensembl_havana	Cacng4	protein_coding	Cluster0001
Cacng7:ENSMUSG00000069806	ENSMUSG00000069806	5	ensembl_havana	Cacng7	protein_coding	Cluster0001
Cadm1:ENSMUSG00000032076	ENSMUSG00000032076	18	ensembl_havana	Cadm1	protein_coding	Cluster0001
Cadm3:ENSMUSG00000005338	ENSMUSG00000005338	13	ensembl_havana	Cadm3	protein_coding	Cluster0001
Cadm4:ENSMUSG00000054793	ENSMUSG00000054793	8	ensembl_havana	Cadm4	protein_coding	Cluster0001
Cadps:ENSMUSG00000054423	ENSMUSG00000054423	13	ensembl	Cadps	protein_coding	Cluster0001
Calb2:ENSMUSG00000003657	ENSMUSG00000003657	8	ensembl	Calb2	protein_coding	Cluster0001
Calcrl:ENSMUSG00000059588	ENSMUSG00000059588	13	ensembl_havana	Calcrl	protein_coding	Cluster0001
Cald1:ENSMUSG00000029761	ENSMUSG00000029761	16	ensembl_havana	Cald1	protein_coding	Cluster0001
Caly:ENSMUSG00000025468	ENSMUSG00000025468	14	ensembl	Caly	protein_coding	Cluster0001
Camk1g:ENSMUSG00000016179	ENSMUSG00000016179	11	ensembl_havana	Camk1g	protein_coding	Cluster0001
Cap2:ENSMUSG00000021373	ENSMUSG00000021373	15	ensembl_havana	Cap2	protein_coding	Cluster0001
Car11:ENSMUSG00000003273	ENSMUSG00000003273	13	ensembl	Car11	protein_coding	Cluster0001
Car14:ENSMUSG00000038526	ENSMUSG00000038526	14	ensembl_havana	Car14	protein_coding	Cluster0001
Caskin1:ENSMUSG00000033597	ENSMUSG00000033597	8	ensembl	Caskin1	protein_coding	Cluster0001
Casp12:ENSMUSG00000025887	ENSMUSG00000025887	10	ensembl_havana	Casp12	protein_coding	Cluster0001
Casq1:ENSMUSG00000007122	ENSMUSG00000007122	11	ensembl_havana	Casq1	protein_coding	Cluster0001
Casq2:ENSMUSG00000027861	ENSMUSG00000027861	13	ensembl_havana	Casq2	protein_coding	Cluster0001
Cav1:ENSMUSG00000007655	ENSMUSG00000007655	16	ensembl_havana	Cav1	protein_coding	Cluster0001
Cav2:ENSMUSG00000000058	ENSMUSG00000000058	6	ensembl_havana	Cav2	protein_coding	Cluster0001
Cav3:ENSMUSG00000062694	ENSMUSG00000062694	7	ensembl_havana	Cav3	protein_coding	Cluster0001
Cbln2:ENSMUSG00000024647	ENSMUSG00000024647	14	ensembl_havana	Cbln2	protein_coding	Cluster0001
Cc2d2a:ENSMUSG00000039765	ENSMUSG00000039765	15	ensembl_havana	Cc2d2a	protein_coding	Cluster0001
Ccbe1:ENSMUSG00000046318	ENSMUSG00000046318	15	ensembl_havana	Ccbe1	protein_coding	Cluster0001
Ccdc136:ENSMUSG00000029769	ENSMUSG00000029769	16	ensembl_havana	Ccdc136	protein_coding	Cluster0001
Ccdc141:ENSMUSG00000044033	ENSMUSG00000044033	16	ensembl_havana	Ccdc141	protein_coding	Cluster0001
Ccdc3:ENSMUSG00000026676	ENSMUSG00000026676	7	ensembl_havana	Ccdc3	protein_coding	Cluster0001
Ccdc60:ENSMUSG00000043913	ENSMUSG00000043913	14	ensembl_havana	Ccdc60	protein_coding	Cluster0001
Ccdc65:ENSMUSG00000003354	ENSMUSG00000003354	5	ensembl	Ccdc65	protein_coding	Cluster0001
Ccdc8:ENSMUSG00000041117	ENSMUSG00000041117	8	ensembl_havana	Ccdc8	protein_coding	Cluster0001
Ccm2l:ENSMUSG00000027474	ENSMUSG00000027474	12	ensembl_havana	Ccm2l	protein_coding	Cluster0001
Cd109:ENSMUSG00000046186	ENSMUSG00000046186	8	ensembl_havana	Cd109	protein_coding	Cluster0001
Cd163:ENSMUSG00000008845	ENSMUSG00000008845	9	ensembl_havana	Cd163	protein_coding	Cluster0001
Cd200:ENSMUSG00000022661	ENSMUSG00000022661	14	ensembl_havana	Cd200	protein_coding	Cluster0001
Cd248:ENSMUSG00000056481	ENSMUSG00000056481	6	ensembl	Cd248	protein_coding	Cluster0001
Cd300e:ENSMUSG00000048498	ENSMUSG00000048498	7	ensembl_havana	Cd300e	protein_coding	Cluster0001
Cd300lg:ENSMUSG00000017309	ENSMUSG00000017309	11	ensembl_havana	Cd300lg	protein_coding	Cluster0001
Cd93:ENSMUSG00000027435	ENSMUSG00000027435	8	ensembl_havana	Cd93	protein_coding	Cluster0001
Cd99l2:ENSMUSG00000035776	ENSMUSG00000035776	14	ensembl_havana	Cd99l2	protein_coding	Cluster0001
Cdc42ep3:ENSMUSG00000036533	ENSMUSG00000036533	8	ensembl	Cdc42ep3	protein_coding	Cluster0001
Cdh11:ENSMUSG00000031673	ENSMUSG00000031673	5	ensembl	Cdh11	protein_coding	Cluster0001
Cdh13:ENSMUSG00000031841	ENSMUSG00000031841	18	ensembl_havana	Cdh13	protein_coding	Cluster0001
Cdh19:ENSMUSG00000047216	ENSMUSG00000047216	8	ensembl_havana	Cdh19	protein_coding	Cluster0001
Cdh2:ENSMUSG00000024304	ENSMUSG00000024304	14	ensembl_havana	Cdh2	protein_coding	Cluster0001
Cdh3:ENSMUSG00000061048	ENSMUSG00000061048	7	ensembl	Cdh3	protein_coding	Cluster0001
Cdh5:ENSMUSG00000031871	ENSMUSG00000031871	8	ensembl	Cdh5	protein_coding	Cluster0001
Cdh6:ENSMUSG00000039385	ENSMUSG00000039385	4	ensembl	Cdh6	protein_coding	Cluster0001
Cdkl5:ENSMUSG00000031292	ENSMUSG00000031292	14	ensembl_havana	Cdkl5	protein_coding	Cluster0001
Cdr2l:ENSMUSG00000050910	ENSMUSG00000050910	5	ensembl_havana	Cdr2l	protein_coding	Cluster0001
Cds2:ENSMUSG00000058793	ENSMUSG00000058793	14	ensembl_havana	Cds2	protein_coding	Cluster0001
Celf4:ENSMUSG00000024268	ENSMUSG00000024268	15	ensembl	Celf4	protein_coding	Cluster0001
Celf6:ENSMUSG00000032297	ENSMUSG00000032297	11	ensembl_havana	Celf6	protein_coding	Cluster0001
Cercam:ENSMUSG00000039787	ENSMUSG00000039787	13	ensembl_havana	Cercam	protein_coding	Cluster0001
Cers1:ENSMUSG00000087408	ENSMUSG00000087408	10	ensembl_havana	Cers1	protein_coding	Cluster0001
Cfh:ENSMUSG00000026365	ENSMUSG00000026365	15	ensembl_havana	Cfh	protein_coding	Cluster0001
Cfl2:ENSMUSG00000062929	ENSMUSG00000062929	7	ensembl	Cfl2	protein_coding	Cluster0001
Chadl:ENSMUSG00000063765	ENSMUSG00000063765	11	ensembl_havana	Chadl	protein_coding	Cluster0001
Chl1:ENSMUSG00000030077	ENSMUSG00000030077	11	ensembl_havana	Chl1	protein_coding	Cluster0001
Chn1:ENSMUSG00000056486	ENSMUSG00000056486	17	ensembl_havana	Chn1	protein_coding	Cluster0001
Chodl:ENSMUSG00000022860	ENSMUSG00000022860	14	ensembl_havana	Chodl	protein_coding	Cluster0001
Chrd:ENSMUSG00000006958	ENSMUSG00000006958	13	ensembl_havana	Chrd	protein_coding	Cluster0001
Chrdl1:ENSMUSG00000031283	ENSMUSG00000031283	16	ensembl_havana	Chrdl1	protein_coding	Cluster0001
Chrdl2:ENSMUSG00000030732	ENSMUSG00000030732	13	ensembl_havana	Chrdl2	protein_coding	Cluster0001
Chrm2:ENSMUSG00000045613	ENSMUSG00000045613	9	ensembl_havana	Chrm2	protein_coding	Cluster0001
Chrna3:ENSMUSG00000032303	ENSMUSG00000032303	6	ensembl	Chrna3	protein_coding	Cluster0001
Chrna5:ENSMUSG00000035594	ENSMUSG00000035594	9	ensembl	Chrna5	protein_coding	Cluster0001
Cidea:ENSMUSG00000024526	ENSMUSG00000024526	8	ensembl	Cidea	protein_coding	Cluster0001
Ckm:ENSMUSG00000030399	ENSMUSG00000030399	2	ensembl_havana	Ckm	protein_coding	Cluster0001
Clec14a:ENSMUSG00000045930	ENSMUSG00000045930	2	ensembl	Clec14a	protein_coding	Cluster0001
Clec1a:ENSMUSG00000033082	ENSMUSG00000033082	10	ensembl_havana	Clec1a	protein_coding	Cluster0001
Clec3b:ENSMUSG00000025784	ENSMUSG00000025784	4	ensembl	Clec3b	protein_coding	Cluster0001
Clec4a3:ENSMUSG00000043832	ENSMUSG00000043832	13	ensembl_havana	Clec4a3	protein_coding	Cluster0001
Clip3:ENSMUSG00000013921	ENSMUSG00000013921	15	ensembl_havana	Clip3	protein_coding	Cluster0001
Clip4:ENSMUSG00000024059	ENSMUSG00000024059	9	ensembl	Clip4	protein_coding	Cluster0001
Clmp:ENSMUSG00000032024	ENSMUSG00000032024	10	ensembl_havana	Clmp	protein_coding	Cluster0001
Clstn2:ENSMUSG00000032452	ENSMUSG00000032452	12	ensembl_havana	Clstn2	protein_coding	Cluster0001
Clstn3:ENSMUSG00000008153	ENSMUSG00000008153	11	ensembl_havana	Clstn3	protein_coding	Cluster0001
Clvs1:ENSMUSG00000041216	ENSMUSG00000041216	15	ensembl_havana	Clvs1	protein_coding	Cluster0001
Cmtm5:ENSMUSG00000040759	ENSMUSG00000040759	8	ensembl	Cmtm5	protein_coding	Cluster0001
Cnga3:ENSMUSG00000026114	ENSMUSG00000026114	14	ensembl_havana	Cnga3	protein_coding	Cluster0001
Cnksr2:ENSMUSG00000025658	ENSMUSG00000025658	16	ensembl_havana	Cnksr2	protein_coding	Cluster0001
Cnn1:ENSMUSG00000001349	ENSMUSG00000001349	4	ensembl	Cnn1	protein_coding	Cluster0001
Cnr1:ENSMUSG00000044288	ENSMUSG00000044288	6	ensembl_havana	Cnr1	protein_coding	Cluster0001
Cnrip1:ENSMUSG00000044629	ENSMUSG00000044629	5	ensembl_havana	Cnrip1	protein_coding	Cluster0001
Cntfr:ENSMUSG00000028444	ENSMUSG00000028444	17	ensembl_havana	Cntfr	protein_coding	Cluster0001
Cntn1:ENSMUSG00000055022	ENSMUSG00000055022	14	ensembl_havana	Cntn1	protein_coding	Cluster0001
Cntn5:ENSMUSG00000039488	ENSMUSG00000039488	15	ensembl_havana	Cntn5	protein_coding	Cluster0001
Cntnap2:ENSMUSG00000039419	ENSMUSG00000039419	17	ensembl_havana	Cntnap2	protein_coding	Cluster0001
Cntnap5a:ENSMUSG00000070695	ENSMUSG00000070695	4	ensembl_havana	Cntnap5a	protein_coding	Cluster0001
Col12a1:ENSMUSG00000032332	ENSMUSG00000032332	17	ensembl_havana	Col12a1	protein_coding	Cluster0001
Col14a1:ENSMUSG00000022371	ENSMUSG00000022371	15	ensembl_havana	Col14a1	protein_coding	Cluster0001
Col16a1:ENSMUSG00000040690	ENSMUSG00000040690	15	ensembl_havana	Col16a1	protein_coding	Cluster0001
Col18a1:ENSMUSG00000001435	ENSMUSG00000001435	14	ensembl_havana	Col18a1	protein_coding	Cluster0001
Col1a1:ENSMUSG00000001506	ENSMUSG00000001506	10	ensembl_havana	Col1a1	protein_coding	Cluster0001
Col1a2:ENSMUSG00000029661	ENSMUSG00000029661	16	ensembl_havana	Col1a2	protein_coding	Cluster0001
Col23a1:ENSMUSG00000063564	ENSMUSG00000063564	13	ensembl_havana	Col23a1	protein_coding	Cluster0001
Col28a1:ENSMUSG00000068794	ENSMUSG00000068794	6	ensembl_havana	Col28a1	protein_coding	Cluster0001
Col3a1:ENSMUSG00000026043	ENSMUSG00000026043	18	ensembl_havana	Col3a1	protein_coding	Cluster0001
Col4a5:ENSMUSG00000031274	ENSMUSG00000031274	16	ensembl_havana	Col4a5	protein_coding	Cluster0001
Col4a6:ENSMUSG00000031273	ENSMUSG00000031273	16	ensembl_havana	Col4a6	protein_coding	Cluster0001
Col5a1:ENSMUSG00000026837	ENSMUSG00000026837	15	ensembl_havana	Col5a1	protein_coding	Cluster0001
Col5a2:ENSMUSG00000026042	ENSMUSG00000026042	16	ensembl_havana	Col5a2	protein_coding	Cluster0001
Col5a3:ENSMUSG00000004098	ENSMUSG00000004098	7	ensembl_havana	Col5a3	protein_coding	Cluster0001
Col6a1:ENSMUSG00000001119	ENSMUSG00000001119	7	ensembl_havana	Col6a1	protein_coding	Cluster0001
Col6a2:ENSMUSG00000020241	ENSMUSG00000020241	13	ensembl_havana	Col6a2	protein_coding	Cluster0001
Col6a3:ENSMUSG00000048126	ENSMUSG00000048126	16	ensembl_havana	Col6a3	protein_coding	Cluster0001
Col6a4:ENSMUSG00000032572	ENSMUSG00000032572	7	ensembl_havana	Col6a4	protein_coding	Cluster0001
Col8a1:ENSMUSG00000068196	ENSMUSG00000068196	4	ensembl_havana	Col8a1	protein_coding	Cluster0001
Col8a2:ENSMUSG00000056174	ENSMUSG00000056174	8	ensembl_havana	Col8a2	protein_coding	Cluster0001
Col9a2:ENSMUSG00000028626	ENSMUSG00000028626	5	ensembl_havana	Col9a2	protein_coding	Cluster0001
Colec10:ENSMUSG00000038591	ENSMUSG00000038591	3	ensembl	Colec10	protein_coding	Cluster0001
Colec12:ENSMUSG00000036103	ENSMUSG00000036103	8	ensembl	Colec12	protein_coding	Cluster0001
Colgalt2:ENSMUSG00000032649	ENSMUSG00000032649	14	ensembl_havana	Colgalt2	protein_coding	Cluster0001
Copz2:ENSMUSG00000018672	ENSMUSG00000018672	15	ensembl_havana	Copz2	protein_coding	Cluster0001
Cpeb1:ENSMUSG00000025586	ENSMUSG00000025586	17	ensembl_havana	Cpeb1	protein_coding	Cluster0001
Cped1:ENSMUSG00000062980	ENSMUSG00000062980	15	ensembl_havana	Cped1	protein_coding	Cluster0001
Cplx1:ENSMUSG00000033615	ENSMUSG00000033615	9	ensembl_havana	Cplx1	protein_coding	Cluster0001
Cpne4:ENSMUSG00000032564	ENSMUSG00000032564	15	ensembl_havana	Cpne4	protein_coding	Cluster0001
Cpt1c:ENSMUSG00000007783	ENSMUSG00000007783	9	ensembl	Cpt1c	protein_coding	Cluster0001
Cpxm2:ENSMUSG00000030862	ENSMUSG00000030862	13	ensembl_havana	Cpxm2	protein_coding	Cluster0001
Creg2:ENSMUSG00000050967	ENSMUSG00000050967	5	ensembl_havana	Creg2	protein_coding	Cluster0001
Crip2:ENSMUSG00000006356	ENSMUSG00000006356	10	ensembl_havana	Crip2	protein_coding	Cluster0001
Crispld1:ENSMUSG00000025776	ENSMUSG00000025776	13	ensembl_havana	Crispld1	protein_coding	Cluster0001
Crispld2:ENSMUSG00000031825	ENSMUSG00000031825	16	ensembl_havana	Crispld2	protein_coding	Cluster0001
Crtac1:ENSMUSG00000042401	ENSMUSG00000042401	6	ensembl	Crtac1	protein_coding	Cluster0001
Crtap:ENSMUSG00000032431	ENSMUSG00000032431	6	ensembl_havana	Crtap	protein_coding	Cluster0001
Cryab:ENSMUSG00000032060	ENSMUSG00000032060	9	ensembl	Cryab	protein_coding	Cluster0001
Csdc2:ENSMUSG00000042109	ENSMUSG00000042109	7	ensembl_havana	Csdc2	protein_coding	Cluster0001
Cspg4:ENSMUSG00000032911	ENSMUSG00000032911	5	ensembl	Cspg4	protein_coding	Cluster0001
Csrp1:ENSMUSG00000026421	ENSMUSG00000026421	14	ensembl_havana	Csrp1	protein_coding	Cluster0001
Ctgf:ENSMUSG00000019997	ENSMUSG00000019997	11	ensembl_havana	Ctgf	protein_coding	Cluster0001
Ctnna2:ENSMUSG00000063063	ENSMUSG00000063063	12	ensembl_havana	Ctnna2	protein_coding	Cluster0001
Ctnna3:ENSMUSG00000060843	ENSMUSG00000060843	11	ensembl_havana	Ctnna3	protein_coding	Cluster0001
Ctxn1:ENSMUSG00000048644	ENSMUSG00000048644	8	ensembl_havana	Ctxn1	protein_coding	Cluster0001
Ctxn3:ENSMUSG00000069372	ENSMUSG00000069372	2	ensembl	Ctxn3	protein_coding	Cluster0001
Cx3cr1:ENSMUSG00000052336	ENSMUSG00000052336	6	ensembl	Cx3cr1	protein_coding	Cluster0001
Cxcl12:ENSMUSG00000061353	ENSMUSG00000061353	11	ensembl_havana	Cxcl12	protein_coding	Cluster0001
Cxcl14:ENSMUSG00000021508	ENSMUSG00000021508	10	ensembl	Cxcl14	protein_coding	Cluster0001
Cxx1b:ENSMUSG00000067924	ENSMUSG00000067924	4	ensembl_havana	Cxx1b	protein_coding	Cluster0001
Cygb:ENSMUSG00000020810	ENSMUSG00000020810	5	ensembl_havana	Cygb	protein_coding	Cluster0001
Cyp1b1:ENSMUSG00000024087	ENSMUSG00000024087	3	ensembl	Cyp1b1	protein_coding	Cluster0001
Cyp7b1:ENSMUSG00000039519	ENSMUSG00000039519	6	ensembl_havana	Cyp7b1	protein_coding	Cluster0001
Cys1:ENSMUSG00000062563	ENSMUSG00000062563	14	ensembl_havana	Cys1	protein_coding	Cluster0001
Cytl1:ENSMUSG00000062329	ENSMUSG00000062329	4	ensembl_havana	Cytl1	protein_coding	Cluster0001
D430019H16Rik:ENSMUSG00000094910	ENSMUSG00000094910	1	ensembl	D430019H16Rik	protein_coding	Cluster0001
D630036G22Rik:ENSMUSG00000104475	ENSMUSG00000104475	1	havana	D630036G22Rik	TEC	Cluster0001
D830050J10Rik:ENSMUSG00000107994	ENSMUSG00000107994	1	ensembl_havana	D830050J10Rik	bidirectional_promoter_lncRNA	Cluster0001
Daam2:ENSMUSG00000040260	ENSMUSG00000040260	7	ensembl	Daam2	protein_coding	Cluster0001
Dab2:ENSMUSG00000022150	ENSMUSG00000022150	16	ensembl_havana	Dab2	protein_coding	Cluster0001
Dact1:ENSMUSG00000044548	ENSMUSG00000044548	11	ensembl_havana	Dact1	protein_coding	Cluster0001
Dact3:ENSMUSG00000078794	ENSMUSG00000078794	4	ensembl_havana	Dact3	protein_coding	Cluster0001
Dapk1:ENSMUSG00000021559	ENSMUSG00000021559	13	ensembl	Dapk1	protein_coding	Cluster0001
Dbh:ENSMUSG00000000889	ENSMUSG00000000889	8	ensembl_havana	Dbh	protein_coding	Cluster0001
Dcbld2:ENSMUSG00000035107	ENSMUSG00000035107	13	ensembl_havana	Dcbld2	protein_coding	Cluster0001
Dchs1:ENSMUSG00000036862	ENSMUSG00000036862	14	ensembl_havana	Dchs1	protein_coding	Cluster0001
Dcn:ENSMUSG00000019929	ENSMUSG00000019929	15	ensembl	Dcn	protein_coding	Cluster0001
Ddr2:ENSMUSG00000026674	ENSMUSG00000026674	9	ensembl_havana	Ddr2	protein_coding	Cluster0001
Ddx26b:ENSMUSG00000035967	ENSMUSG00000035967	15	ensembl_havana	Ddx26b	protein_coding	Cluster0001
Dennd2a:ENSMUSG00000038456	ENSMUSG00000038456	9	ensembl_havana	Dennd2a	protein_coding	Cluster0001
Des:ENSMUSG00000026208	ENSMUSG00000026208	9	ensembl_havana	Des	protein_coding	Cluster0001
Dgkb:ENSMUSG00000036095	ENSMUSG00000036095	10	ensembl	Dgkb	protein_coding	Cluster0001
Dhh:ENSMUSG00000023000	ENSMUSG00000023000	4	ensembl	Dhh	protein_coding	Cluster0001
Dip2c:ENSMUSG00000048264	ENSMUSG00000048264	15	ensembl_havana	Dip2c	protein_coding	Cluster0001
Diras1:ENSMUSG00000043670	ENSMUSG00000043670	4	ensembl_havana	Diras1	protein_coding	Cluster0001
Diras2:ENSMUSG00000047842	ENSMUSG00000047842	6	ensembl	Diras2	protein_coding	Cluster0001
Dkk2:ENSMUSG00000028031	ENSMUSG00000028031	6	ensembl_havana	Dkk2	protein_coding	Cluster0001
Dkk3:ENSMUSG00000030772	ENSMUSG00000030772	5	ensembl	Dkk3	protein_coding	Cluster0001
Dlc1:ENSMUSG00000031523	ENSMUSG00000031523	16	ensembl_havana	Dlc1	protein_coding	Cluster0001
Dlg2:ENSMUSG00000052572	ENSMUSG00000052572	16	ensembl_havana	Dlg2	protein_coding	Cluster0001
Dlg4:ENSMUSG00000020886	ENSMUSG00000020886	16	ensembl_havana	Dlg4	protein_coding	Cluster0001
Dmd:ENSMUSG00000045103	ENSMUSG00000045103	17	ensembl_havana	Dmd	protein_coding	Cluster0001
Dmkn:ENSMUSG00000060962	ENSMUSG00000060962	12	ensembl_havana	Dmkn	protein_coding	Cluster0001
Dmpk:ENSMUSG00000030409	ENSMUSG00000030409	15	ensembl_havana	Dmpk	protein_coding	Cluster0001
Dmtn:ENSMUSG00000022099	ENSMUSG00000022099	16	ensembl	Dmtn	protein_coding	Cluster0001
Dnajb5:ENSMUSG00000036052	ENSMUSG00000036052	14	ensembl_havana	Dnajb5	protein_coding	Cluster0001
Dnajc6:ENSMUSG00000028528	ENSMUSG00000028528	16	ensembl_havana	Dnajc6	protein_coding	Cluster0001
Dnal1:ENSMUSG00000042523	ENSMUSG00000042523	12	ensembl_havana	Dnal1	protein_coding	Cluster0001
Dner:ENSMUSG00000036766	ENSMUSG00000036766	12	ensembl_havana	Dner	protein_coding	Cluster0001
Doc2b:ENSMUSG00000020848	ENSMUSG00000020848	7	ensembl_havana	Doc2b	protein_coding	Cluster0001
Dock4:ENSMUSG00000035954	ENSMUSG00000035954	9	ensembl	Dock4	protein_coding	Cluster0001
Dpp10:ENSMUSG00000036815	ENSMUSG00000036815	16	ensembl_havana	Dpp10	protein_coding	Cluster0001
Dpp6:ENSMUSG00000061576	ENSMUSG00000061576	15	ensembl_havana	Dpp6	protein_coding	Cluster0001
Dpt:ENSMUSG00000026574	ENSMUSG00000026574	5	ensembl_havana	Dpt	protein_coding	Cluster0001
Dpysl4:ENSMUSG00000025478	ENSMUSG00000025478	15	ensembl_havana	Dpysl4	protein_coding	Cluster0001
Drp2:ENSMUSG00000000223	ENSMUSG00000000223	13	ensembl_havana	Drp2	protein_coding	Cluster0001
Dsc3:ENSMUSG00000059898	ENSMUSG00000059898	8	ensembl	Dsc3	protein_coding	Cluster0001
Dse:ENSMUSG00000039497	ENSMUSG00000039497	7	ensembl	Dse	protein_coding	Cluster0001
Dsel:ENSMUSG00000038702	ENSMUSG00000038702	6	ensembl_havana	Dsel	protein_coding	Cluster0001
Dtna:ENSMUSG00000024302	ENSMUSG00000024302	15	ensembl	Dtna	protein_coding	Cluster0001
Dysf:ENSMUSG00000033788	ENSMUSG00000033788	15	ensembl_havana	Dysf	protein_coding	Cluster0001
Dzank1:ENSMUSG00000037259	ENSMUSG00000037259	15	ensembl_havana	Dzank1	protein_coding	Cluster0001
Dzip1:ENSMUSG00000042156	ENSMUSG00000042156	15	ensembl	Dzip1	protein_coding	Cluster0001
Dzip1l:ENSMUSG00000037784	ENSMUSG00000037784	14	ensembl_havana	Dzip1l	protein_coding	Cluster0001
Ebf3:ENSMUSG00000010476	ENSMUSG00000010476	13	ensembl	Ebf3	protein_coding	Cluster0001
Ebf4:ENSMUSG00000053552	ENSMUSG00000053552	14	ensembl_havana	Ebf4	protein_coding	Cluster0001
Ecm1:ENSMUSG00000028108	ENSMUSG00000028108	15	ensembl_havana	Ecm1	protein_coding	Cluster0001
Ecm2:ENSMUSG00000043631	ENSMUSG00000043631	7	ensembl	Ecm2	protein_coding	Cluster0001
Eda:ENSMUSG00000059327	ENSMUSG00000059327	9	ensembl_havana	Eda	protein_coding	Cluster0001
Edar:ENSMUSG00000003227	ENSMUSG00000003227	4	ensembl_havana	Edar	protein_coding	Cluster0001
Edil3:ENSMUSG00000034488	ENSMUSG00000034488	14	ensembl_havana	Edil3	protein_coding	Cluster0001
Ednra:ENSMUSG00000031616	ENSMUSG00000031616	7	ensembl_havana	Ednra	protein_coding	Cluster0001
Ednrb:ENSMUSG00000022122	ENSMUSG00000022122	14	ensembl	Ednrb	protein_coding	Cluster0001
Eef1a2:ENSMUSG00000016349	ENSMUSG00000016349	10	ensembl_havana	Eef1a2	protein_coding	Cluster0001
Efcab9:ENSMUSG00000044056	ENSMUSG00000044056	3	ensembl_havana	Efcab9	protein_coding	Cluster0001
Efcc1:ENSMUSG00000068263	ENSMUSG00000068263	11	ensembl_havana	Efcc1	protein_coding	Cluster0001
Efemp1:ENSMUSG00000020467	ENSMUSG00000020467	15	ensembl_havana	Efemp1	protein_coding	Cluster0001
Efemp2:ENSMUSG00000024909	ENSMUSG00000024909	14	ensembl_havana	Efemp2	protein_coding	Cluster0001
Efna5:ENSMUSG00000048915	ENSMUSG00000048915	12	ensembl_havana	Efna5	protein_coding	Cluster0001
Efs:ENSMUSG00000022203	ENSMUSG00000022203	6	ensembl	Efs	protein_coding	Cluster0001
Egflam:ENSMUSG00000042961	ENSMUSG00000042961	13	ensembl_havana	Egflam	protein_coding	Cluster0001
Ehd2:ENSMUSG00000074364	ENSMUSG00000074364	5	ensembl_havana	Ehd2	protein_coding	Cluster0001
Eif4ebp1:ENSMUSG00000031490	ENSMUSG00000031490	5	ensembl	Eif4ebp1	protein_coding	Cluster0001
Elavl3:ENSMUSG00000003410	ENSMUSG00000003410	7	ensembl	Elavl3	protein_coding	Cluster0001
Elavl4:ENSMUSG00000028546	ENSMUSG00000028546	17	ensembl_havana	Elavl4	protein_coding	Cluster0001
Elmod1:ENSMUSG00000041986	ENSMUSG00000041986	15	ensembl	Elmod1	protein_coding	Cluster0001
Elovl4:ENSMUSG00000032262	ENSMUSG00000032262	13	ensembl_havana	Elovl4	protein_coding	Cluster0001
Emilin1:ENSMUSG00000029163	ENSMUSG00000029163	9	ensembl_havana	Emilin1	protein_coding	Cluster0001
Eml1:ENSMUSG00000058070	ENSMUSG00000058070	14	ensembl_havana	Eml1	protein_coding	Cluster0001
Enah:ENSMUSG00000022995	ENSMUSG00000022995	16	ensembl_havana	Enah	protein_coding	Cluster0001
Eng:ENSMUSG00000026814	ENSMUSG00000026814	16	ensembl_havana	Eng	protein_coding	Cluster0001
Enho:ENSMUSG00000028445	ENSMUSG00000028445	7	ensembl_havana	Enho	protein_coding	Cluster0001
Eno2:ENSMUSG00000004267	ENSMUSG00000004267	16	ensembl_havana	Eno2	protein_coding	Cluster0001
Enpp6:ENSMUSG00000038173	ENSMUSG00000038173	14	ensembl_havana	Enpp6	protein_coding	Cluster0001
Entpd3:ENSMUSG00000041608	ENSMUSG00000041608	7	ensembl_havana	Entpd3	protein_coding	Cluster0001
Epha7:ENSMUSG00000028289	ENSMUSG00000028289	12	ensembl_havana	Epha7	protein_coding	Cluster0001
Epn2:ENSMUSG00000001036	ENSMUSG00000001036	17	ensembl_havana	Epn2	protein_coding	Cluster0001
Epor:ENSMUSG00000006235	ENSMUSG00000006235	5	ensembl	Epor	protein_coding	Cluster0001
Erg:ENSMUSG00000040732	ENSMUSG00000040732	18	ensembl_havana	Erg	protein_coding	Cluster0001
Esr1:ENSMUSG00000019768	ENSMUSG00000019768	16	ensembl_havana	Esr1	protein_coding	Cluster0001
Etv1:ENSMUSG00000004151	ENSMUSG00000004151	16	ensembl_havana	Etv1	protein_coding	Cluster0001
Evc:ENSMUSG00000029122	ENSMUSG00000029122	11	ensembl_havana	Evc	protein_coding	Cluster0001
Evc2:ENSMUSG00000050248	ENSMUSG00000050248	11	ensembl_havana	Evc2	protein_coding	Cluster0001
Exoc3l2:ENSMUSG00000011263	ENSMUSG00000011263	16	ensembl_havana	Exoc3l2	protein_coding	Cluster0001
F13a1:ENSMUSG00000039109	ENSMUSG00000039109	15	ensembl	F13a1	protein_coding	Cluster0001
F2r:ENSMUSG00000048376	ENSMUSG00000048376	5	ensembl	F2r	protein_coding	Cluster0001
F3:ENSMUSG00000028128	ENSMUSG00000028128	13	ensembl_havana	F3	protein_coding	Cluster0001
Fabp3:ENSMUSG00000028773	ENSMUSG00000028773	8	ensembl_havana	Fabp3	protein_coding	Cluster0001
Faim2:ENSMUSG00000023011	ENSMUSG00000023011	7	ensembl	Faim2	protein_coding	Cluster0001
Fam107a:ENSMUSG00000021750	ENSMUSG00000021750	15	ensembl_havana	Fam107a	protein_coding	Cluster0001
Fam124a:ENSMUSG00000035184	ENSMUSG00000035184	15	ensembl_havana	Fam124a	protein_coding	Cluster0001
Fam129a:ENSMUSG00000026483	ENSMUSG00000026483	13	ensembl_havana	Fam129a	protein_coding	Cluster0001
Fam131b:ENSMUSG00000029861	ENSMUSG00000029861	17	ensembl_havana	Fam131b	protein_coding	Cluster0001
Fam13c:ENSMUSG00000043259	ENSMUSG00000043259	14	ensembl_havana	Fam13c	protein_coding	Cluster0001
Fam155a:ENSMUSG00000079157	ENSMUSG00000079157	4	ensembl_havana	Fam155a	protein_coding	Cluster0001
Fam163a:ENSMUSG00000015484	ENSMUSG00000015484	3	ensembl_havana	Fam163a	protein_coding	Cluster0001
Fam169a:ENSMUSG00000041817	ENSMUSG00000041817	13	ensembl	Fam169a	protein_coding	Cluster0001
Fam171a2:ENSMUSG00000034685	ENSMUSG00000034685	4	ensembl_havana	Fam171a2	protein_coding	Cluster0001
Fam171b:ENSMUSG00000048388	ENSMUSG00000048388	3	ensembl_havana	Fam171b	protein_coding	Cluster0001
Fam198a:ENSMUSG00000038233	ENSMUSG00000038233	8	ensembl	Fam198a	protein_coding	Cluster0001
Fam19a1:ENSMUSG00000059187	ENSMUSG00000059187	12	ensembl_havana	Fam19a1	protein_coding	Cluster0001
Fam19a5:ENSMUSG00000054863	ENSMUSG00000054863	8	ensembl	Fam19a5	protein_coding	Cluster0001
Fam212b:ENSMUSG00000048458	ENSMUSG00000048458	8	ensembl_havana	Fam212b	protein_coding	Cluster0001
Fam26e:ENSMUSG00000049872	ENSMUSG00000049872	7	ensembl	Fam26e	protein_coding	Cluster0001
Fam46b:ENSMUSG00000046694	ENSMUSG00000046694	6	ensembl_havana	Fam46b	protein_coding	Cluster0001
Fam78b:ENSMUSG00000060568	ENSMUSG00000060568	14	ensembl_havana	Fam78b	protein_coding	Cluster0001
Fam83d:ENSMUSG00000027654	ENSMUSG00000027654	2	ensembl_havana	Fam83d	protein_coding	Cluster0001
Fat4:ENSMUSG00000046743	ENSMUSG00000046743	6	ensembl_havana	Fat4	protein_coding	Cluster0001
Faxc:ENSMUSG00000028246	ENSMUSG00000028246	13	ensembl_havana	Faxc	protein_coding	Cluster0001
Fbln2:ENSMUSG00000064080	ENSMUSG00000064080	12	ensembl_havana	Fbln2	protein_coding	Cluster0001
Fbln5:ENSMUSG00000021186	ENSMUSG00000021186	8	ensembl	Fbln5	protein_coding	Cluster0001
Fbln7:ENSMUSG00000027386	ENSMUSG00000027386	9	ensembl_havana	Fbln7	protein_coding	Cluster0001
Fbn1:ENSMUSG00000027204	ENSMUSG00000027204	13	ensembl_havana	Fbn1	protein_coding	Cluster0001
Fbxl16:ENSMUSG00000025738	ENSMUSG00000025738	7	ensembl	Fbxl16	protein_coding	Cluster0001
Fbxl2:ENSMUSG00000032507	ENSMUSG00000032507	15	ensembl_havana	Fbxl2	protein_coding	Cluster0001
Fbxl22:ENSMUSG00000050503	ENSMUSG00000050503	8	ensembl	Fbxl22	protein_coding	Cluster0001
Fbxl7:ENSMUSG00000043556	ENSMUSG00000043556	9	ensembl	Fbxl7	protein_coding	Cluster0001
Fbxo2:ENSMUSG00000041556	ENSMUSG00000041556	8	ensembl_havana	Fbxo2	protein_coding	Cluster0001
Fcrls:ENSMUSG00000015852	ENSMUSG00000015852	13	ensembl_havana	Fcrls	protein_coding	Cluster0001
Fermt2:ENSMUSG00000037712	ENSMUSG00000037712	15	ensembl_havana	Fermt2	protein_coding	Cluster0001
Fez1:ENSMUSG00000032118	ENSMUSG00000032118	15	ensembl_havana	Fez1	protein_coding	Cluster0001
Fgd1:ENSMUSG00000025265	ENSMUSG00000025265	14	ensembl_havana	Fgd1	protein_coding	Cluster0001
Fgd5:ENSMUSG00000034037	ENSMUSG00000034037	14	ensembl_havana	Fgd5	protein_coding	Cluster0001
Fgf1:ENSMUSG00000036585	ENSMUSG00000036585	15	ensembl_havana	Fgf1	protein_coding	Cluster0001
Fgf13:ENSMUSG00000031137	ENSMUSG00000031137	17	ensembl_havana	Fgf13	protein_coding	Cluster0001
Fgf18:ENSMUSG00000057967	ENSMUSG00000057967	12	ensembl_havana	Fgf18	protein_coding	Cluster0001
Fgf2:ENSMUSG00000037225	ENSMUSG00000037225	13	ensembl_havana	Fgf2	protein_coding	Cluster0001
Fgf7:ENSMUSG00000027208	ENSMUSG00000027208	14	ensembl_havana	Fgf7	protein_coding	Cluster0001
Fgfr1:ENSMUSG00000031565	ENSMUSG00000031565	17	ensembl_havana	Fgfr1	protein_coding	Cluster0001
Fgfr2:ENSMUSG00000030849	ENSMUSG00000030849	18	ensembl_havana	Fgfr2	protein_coding	Cluster0001
Fhod3:ENSMUSG00000034295	ENSMUSG00000034295	9	ensembl	Fhod3	protein_coding	Cluster0001
Fibcd1:ENSMUSG00000026841	ENSMUSG00000026841	7	ensembl_havana	Fibcd1	protein_coding	Cluster0001
Fibin:ENSMUSG00000074971	ENSMUSG00000074971	4	ensembl_havana	Fibin	protein_coding	Cluster0001
Filip1:ENSMUSG00000034898	ENSMUSG00000034898	15	ensembl_havana	Filip1	protein_coding	Cluster0001
Fjx1:ENSMUSG00000075012	ENSMUSG00000075012	4	ensembl_havana	Fjx1	protein_coding	Cluster0001
Fkbp10:ENSMUSG00000001555	ENSMUSG00000001555	10	ensembl_havana	Fkbp10	protein_coding	Cluster0001
Fkbp14:ENSMUSG00000038074	ENSMUSG00000038074	16	ensembl_havana	Fkbp14	protein_coding	Cluster0001
Fkbp1b:ENSMUSG00000020635	ENSMUSG00000020635	7	ensembl	Fkbp1b	protein_coding	Cluster0001
Fkbp9:ENSMUSG00000029781	ENSMUSG00000029781	7	ensembl_havana	Fkbp9	protein_coding	Cluster0001
Flna:ENSMUSG00000031328	ENSMUSG00000031328	15	ensembl_havana	Flna	protein_coding	Cluster0001
Flnc:ENSMUSG00000068699	ENSMUSG00000068699	12	ensembl_havana	Flnc	protein_coding	Cluster0001
Flrt2:ENSMUSG00000047414	ENSMUSG00000047414	6	ensembl_havana	Flrt2	protein_coding	Cluster0001
Flt1:ENSMUSG00000029648	ENSMUSG00000029648	13	ensembl_havana	Flt1	protein_coding	Cluster0001
Flt4:ENSMUSG00000020357	ENSMUSG00000020357	3	ensembl_havana	Flt4	protein_coding	Cluster0001
Fmn2:ENSMUSG00000028354	ENSMUSG00000028354	13	ensembl_havana	Fmn2	protein_coding	Cluster0001
Fn1:ENSMUSG00000026193	ENSMUSG00000026193	15	ensembl_havana	Fn1	protein_coding	Cluster0001
Fndc1:ENSMUSG00000071984	ENSMUSG00000071984	10	ensembl_havana	Fndc1	protein_coding	Cluster0001
Foxd3:ENSMUSG00000067261	ENSMUSG00000067261	4	ensembl_havana	Foxd3	protein_coding	Cluster0001
Foxf1:ENSMUSG00000042812	ENSMUSG00000042812	5	ensembl_havana	Foxf1	protein_coding	Cluster0001
Foxf2:ENSMUSG00000038402	ENSMUSG00000038402	2	ensembl_havana	Foxf2	protein_coding	Cluster0001
Foxl1:ENSMUSG00000097084	ENSMUSG00000097084	1	havana	Foxl1	protein_coding	Cluster0001
Foxp2:ENSMUSG00000029563	ENSMUSG00000029563	16	ensembl_havana	Foxp2	protein_coding	Cluster0001
Frem2:ENSMUSG00000037016	ENSMUSG00000037016	11	ensembl_havana	Frem2	protein_coding	Cluster0001
Frmd4a:ENSMUSG00000026657	ENSMUSG00000026657	16	ensembl_havana	Frmd4a	protein_coding	Cluster0001
Frmd6:ENSMUSG00000048285	ENSMUSG00000048285	8	ensembl	Frmd6	protein_coding	Cluster0001
Frmpd1:ENSMUSG00000035615	ENSMUSG00000035615	12	ensembl_havana	Frmpd1	protein_coding	Cluster0001
Frzb:ENSMUSG00000027004	ENSMUSG00000027004	3	ensembl_havana	Frzb	protein_coding	Cluster0001
Fstl1:ENSMUSG00000022816	ENSMUSG00000022816	11	ensembl_havana	Fstl1	protein_coding	Cluster0001
Fstl3:ENSMUSG00000020325	ENSMUSG00000020325	10	ensembl_havana	Fstl3	protein_coding	Cluster0001
Fstl5:ENSMUSG00000034098	ENSMUSG00000034098	14	ensembl_havana	Fstl5	protein_coding	Cluster0001
Fut10:ENSMUSG00000046152	ENSMUSG00000046152	16	ensembl_havana	Fut10	protein_coding	Cluster0001
Fxyd1:ENSMUSG00000036570	ENSMUSG00000036570	14	ensembl_havana	Fxyd1	protein_coding	Cluster0001
Fxyd6:ENSMUSG00000066705	ENSMUSG00000066705	6	ensembl	Fxyd6	protein_coding	Cluster0001
Fxyd7:ENSMUSG00000036578	ENSMUSG00000036578	7	ensembl_havana	Fxyd7	protein_coding	Cluster0001
Fzd1:ENSMUSG00000044674	ENSMUSG00000044674	6	ensembl_havana	Fzd1	protein_coding	Cluster0001
Fzd2:ENSMUSG00000050288	ENSMUSG00000050288	6	ensembl_havana	Fzd2	protein_coding	Cluster0001
Gabbr1:ENSMUSG00000024462	ENSMUSG00000024462	17	ensembl_havana	Gabbr1	protein_coding	Cluster0001
Gabrb3:ENSMUSG00000033676	ENSMUSG00000033676	13	ensembl_havana	Gabrb3	protein_coding	Cluster0001
Gal:ENSMUSG00000024907	ENSMUSG00000024907	6	ensembl	Gal	protein_coding	Cluster0001
Galnt16:ENSMUSG00000021130	ENSMUSG00000021130	7	ensembl	Galnt16	protein_coding	Cluster0001
Galnt18:ENSMUSG00000038296	ENSMUSG00000038296	14	ensembl_havana	Galnt18	protein_coding	Cluster0001
Galr2:ENSMUSG00000020793	ENSMUSG00000020793	5	ensembl_havana	Galr2	protein_coding	Cluster0001
Gap43:ENSMUSG00000047261	ENSMUSG00000047261	9	ensembl_havana	Gap43	protein_coding	Cluster0001
Gas1:ENSMUSG00000052957	ENSMUSG00000052957	7	ensembl_havana	Gas1	protein_coding	Cluster0001
Gas2l2:ENSMUSG00000020686	ENSMUSG00000020686	12	ensembl_havana	Gas2l2	protein_coding	Cluster0001
Gata2:ENSMUSG00000015053	ENSMUSG00000015053	14	ensembl_havana	Gata2	protein_coding	Cluster0001
Gcgr:ENSMUSG00000025127	ENSMUSG00000025127	15	ensembl_havana	Gcgr	protein_coding	Cluster0001
Gdap1:ENSMUSG00000025777	ENSMUSG00000025777	8	ensembl_havana	Gdap1	protein_coding	Cluster0001
Gdf10:ENSMUSG00000021943	ENSMUSG00000021943	6	ensembl	Gdf10	protein_coding	Cluster0001
Gdnf:ENSMUSG00000022144	ENSMUSG00000022144	3	ensembl	Gdnf	protein_coding	Cluster0001
Gfap:ENSMUSG00000020932	ENSMUSG00000020932	14	ensembl_havana	Gfap	protein_coding	Cluster0001
Gfpt2:ENSMUSG00000020363	ENSMUSG00000020363	6	ensembl_havana	Gfpt2	protein_coding	Cluster0001
Gfra1:ENSMUSG00000025089	ENSMUSG00000025089	15	ensembl_havana	Gfra1	protein_coding	Cluster0001
Gfra4:ENSMUSG00000027316	ENSMUSG00000027316	15	ensembl_havana	Gfra4	protein_coding	Cluster0001
Gja1:ENSMUSG00000050953	ENSMUSG00000050953	9	ensembl	Gja1	protein_coding	Cluster0001
Gja5:ENSMUSG00000057123	ENSMUSG00000057123	14	ensembl_havana	Gja5	protein_coding	Cluster0001
Gjc1:ENSMUSG00000034520	ENSMUSG00000034520	14	ensembl_havana	Gjc1	protein_coding	Cluster0001
Gjc2:ENSMUSG00000043448	ENSMUSG00000043448	13	ensembl_havana	Gjc2	protein_coding	Cluster0001
Gjc3:ENSMUSG00000056966	ENSMUSG00000056966	7	ensembl_havana	Gjc3	protein_coding	Cluster0001
Gjd3:ENSMUSG00000047197	ENSMUSG00000047197	1	ensembl_havana	Gjd3	protein_coding	Cluster0001
Gli2:ENSMUSG00000048402	ENSMUSG00000048402	14	ensembl_havana	Gli2	protein_coding	Cluster0001
Gli3:ENSMUSG00000021318	ENSMUSG00000021318	15	ensembl_havana	Gli3	protein_coding	Cluster0001
Glp2r:ENSMUSG00000049928	ENSMUSG00000049928	15	ensembl_havana	Glp2r	protein_coding	Cluster0001
Glrb:ENSMUSG00000028020	ENSMUSG00000028020	16	ensembl_havana	Glrb	protein_coding	Cluster0001
Gm10605:ENSMUSG00000097974	ENSMUSG00000097974	1	havana	Gm10605	lincRNA	Cluster0001
Gm12963:ENSMUSG00000085517	ENSMUSG00000085517	7	havana	Gm12963	antisense	Cluster0001
Gm13446:ENSMUSG00000086555	ENSMUSG00000086555	2	havana	Gm13446	processed_transcript	Cluster0001
Gm13889:ENSMUSG00000087006	ENSMUSG00000087006	3	havana	Gm13889	protein_coding	Cluster0001
Gm15737:ENSMUSG00000079462	ENSMUSG00000079462	1	havana	Gm15737	protein_coding	Cluster0001
Gm15787:ENSMUSG00000086247	ENSMUSG00000086247	7	havana	Gm15787	processed_transcript	Cluster0001
Gm15816:ENSMUSG00000086741	ENSMUSG00000086741	1	havana	Gm15816	antisense	Cluster0001
Gm16141:ENSMUSG00000087507	ENSMUSG00000087507	1	havana	Gm16141	antisense	Cluster0001
Gm16364:ENSMUSG00000087014	ENSMUSG00000087014	1	havana	Gm16364	antisense	Cluster0001
Gm16701:ENSMUSG00000097823	ENSMUSG00000097823	2	havana	Gm16701	lincRNA	Cluster0001
Gm17029:ENSMUSG00000086740	ENSMUSG00000086740	1	havana	Gm17029	antisense	Cluster0001
Gm17396:ENSMUSG00000079669	ENSMUSG00000079669	2	havana	Gm17396	processed_transcript	Cluster0001
Gm17501:ENSMUSG00000097183	ENSMUSG00000097183	2	havana	Gm17501	lincRNA	Cluster0001
Gm26645:ENSMUSG00000097684	ENSMUSG00000097684	1	havana	Gm26645	antisense	Cluster0001
Gm26682:ENSMUSG00000097888	ENSMUSG00000097888	1	ensembl	Gm26682	lincRNA	Cluster0001
Gm28729:ENSMUSG00000099564	ENSMUSG00000099564	1	havana	Gm28729	lincRNA	Cluster0001
Gm38400:ENSMUSG00000096025	ENSMUSG00000096025	2	havana	Gm38400	processed_pseudogene	Cluster0001
Gm42517:ENSMUSG00000105867	ENSMUSG00000105867	1	havana	Gm42517	lincRNA	Cluster0001
Gm42712:ENSMUSG00000106995	ENSMUSG00000106995	1	havana	Gm42712	TEC	Cluster0001
Gm43034:ENSMUSG00000106662	ENSMUSG00000106662	1	havana	Gm43034	TEC	Cluster0001
Gm43719:ENSMUSG00000105366	ENSMUSG00000105366	1	havana	Gm43719	TEC	Cluster0001
Gm44220:ENSMUSG00000107655	ENSMUSG00000107655	1	havana	Gm44220	TEC	Cluster0001
Gmpr:ENSMUSG00000000253	ENSMUSG00000000253	12	ensembl_havana	Gmpr	protein_coding	Cluster0001
Gnai1:ENSMUSG00000057614	ENSMUSG00000057614	6	ensembl_havana	Gnai1	protein_coding	Cluster0001
Gnao1:ENSMUSG00000031748	ENSMUSG00000031748	15	ensembl_havana	Gnao1	protein_coding	Cluster0001
Gnb4:ENSMUSG00000027669	ENSMUSG00000027669	14	ensembl_havana	Gnb4	protein_coding	Cluster0001
Gng7:ENSMUSG00000048240	ENSMUSG00000048240	14	ensembl_havana	Gng7	protein_coding	Cluster0001
Gng8:ENSMUSG00000063594	ENSMUSG00000063594	5	ensembl_havana	Gng8	protein_coding	Cluster0001
Gpbar1:ENSMUSG00000064272	ENSMUSG00000064272	3	ensembl_havana	Gpbar1	protein_coding	Cluster0001
Gpc3:ENSMUSG00000055653	ENSMUSG00000055653	13	ensembl_havana	Gpc3	protein_coding	Cluster0001
Gpc6:ENSMUSG00000058571	ENSMUSG00000058571	10	ensembl_havana	Gpc6	protein_coding	Cluster0001
Gpr149:ENSMUSG00000043441	ENSMUSG00000043441	5	ensembl_havana	Gpr149	protein_coding	Cluster0001
Gpr153:ENSMUSG00000042804	ENSMUSG00000042804	13	ensembl_havana	Gpr153	protein_coding	Cluster0001
Gpr161:ENSMUSG00000040836	ENSMUSG00000040836	15	ensembl_havana	Gpr161	protein_coding	Cluster0001
Gpr162:ENSMUSG00000038390	ENSMUSG00000038390	11	ensembl_havana	Gpr162	protein_coding	Cluster0001
Gpr173:ENSMUSG00000056679	ENSMUSG00000056679	13	ensembl_havana	Gpr173	protein_coding	Cluster0001
Gpr182:ENSMUSG00000058396	ENSMUSG00000058396	7	ensembl_havana	Gpr182	protein_coding	Cluster0001
Gpr20:ENSMUSG00000045281	ENSMUSG00000045281	5	ensembl_havana	Gpr20	protein_coding	Cluster0001
Gpr27:ENSMUSG00000072875	ENSMUSG00000072875	2	ensembl_havana	Gpr27	protein_coding	Cluster0001
Gpr37:ENSMUSG00000039904	ENSMUSG00000039904	9	ensembl_havana	Gpr37	protein_coding	Cluster0001
Gpr37l1:ENSMUSG00000026424	ENSMUSG00000026424	8	ensembl_havana	Gpr37l1	protein_coding	Cluster0001
Gpr4:ENSMUSG00000044317	ENSMUSG00000044317	7	ensembl_havana	Gpr4	protein_coding	Cluster0001
Gpr85:ENSMUSG00000048216	ENSMUSG00000048216	13	ensembl_havana	Gpr85	protein_coding	Cluster0001
Gprasp1:ENSMUSG00000043384	ENSMUSG00000043384	15	ensembl_havana	Gprasp1	protein_coding	Cluster0001
Gprasp2:ENSMUSG00000072966	ENSMUSG00000072966	11	ensembl_havana	Gprasp2	protein_coding	Cluster0001
Gprc5b:ENSMUSG00000008734	ENSMUSG00000008734	9	ensembl_havana	Gprc5b	protein_coding	Cluster0001
Gpx3:ENSMUSG00000018339	ENSMUSG00000018339	11	ensembl_havana	Gpx3	protein_coding	Cluster0001
Grb10:ENSMUSG00000020176	ENSMUSG00000020176	17	ensembl_havana	Grb10	protein_coding	Cluster0001
Grb14:ENSMUSG00000026888	ENSMUSG00000026888	14	ensembl_havana	Grb14	protein_coding	Cluster0001
Grem1:ENSMUSG00000074934	ENSMUSG00000074934	3	ensembl_havana	Grem1	protein_coding	Cluster0001
Grem2:ENSMUSG00000050069	ENSMUSG00000050069	3	ensembl_havana	Grem2	protein_coding	Cluster0001
Gria1:ENSMUSG00000020524	ENSMUSG00000020524	16	ensembl_havana	Gria1	protein_coding	Cluster0001
Gria3:ENSMUSG00000001986	ENSMUSG00000001986	16	ensembl_havana	Gria3	protein_coding	Cluster0001
Gria4:ENSMUSG00000025892	ENSMUSG00000025892	15	ensembl	Gria4	protein_coding	Cluster0001
Grik3:ENSMUSG00000001985	ENSMUSG00000001985	9	ensembl_havana	Grik3	protein_coding	Cluster0001
Grpr:ENSMUSG00000031364	ENSMUSG00000031364	2	ensembl_havana	Grpr	protein_coding	Cluster0001
Gucy1a3:ENSMUSG00000033910	ENSMUSG00000033910	13	ensembl_havana	Gucy1a3	protein_coding	Cluster0001
Gucy1b3:ENSMUSG00000028005	ENSMUSG00000028005	13	ensembl_havana	Gucy1b3	protein_coding	Cluster0001
Gulp1:ENSMUSG00000056870	ENSMUSG00000056870	9	ensembl_havana	Gulp1	protein_coding	Cluster0001
H2afy2:ENSMUSG00000020086	ENSMUSG00000020086	6	ensembl_havana	H2afy2	protein_coding	Cluster0001
Hacd4:ENSMUSG00000028497	ENSMUSG00000028497	12	ensembl_havana	Hacd4	protein_coding	Cluster0001
Hand1:ENSMUSG00000037335	ENSMUSG00000037335	13	ensembl_havana	Hand1	protein_coding	Cluster0001
Hand2:ENSMUSG00000038193	ENSMUSG00000038193	3	ensembl_havana	Hand2	protein_coding	Cluster0001
Has2:ENSMUSG00000022367	ENSMUSG00000022367	7	ensembl_havana	Has2	protein_coding	Cluster0001
Hcar1:ENSMUSG00000049241	ENSMUSG00000049241	5	ensembl_havana	Hcar1	protein_coding	Cluster0001
Hdgfrp3:ENSMUSG00000025104	ENSMUSG00000025104	13	ensembl_havana	Hdgfrp3	protein_coding	Cluster0001
Hebp2:ENSMUSG00000019853	ENSMUSG00000019853	5	ensembl	Hebp2	protein_coding	Cluster0001
Hecw2:ENSMUSG00000042807	ENSMUSG00000042807	15	ensembl_havana	Hecw2	protein_coding	Cluster0001
Hey2:ENSMUSG00000019789	ENSMUSG00000019789	8	ensembl_havana	Hey2	protein_coding	Cluster0001
Hgf:ENSMUSG00000028864	ENSMUSG00000028864	7	ensembl_havana	Hgf	protein_coding	Cluster0001
Hhatl:ENSMUSG00000032523	ENSMUSG00000032523	10	ensembl	Hhatl	protein_coding	Cluster0001
Hhip:ENSMUSG00000064325	ENSMUSG00000064325	3	ensembl_havana	Hhip	protein_coding	Cluster0001
Hip1:ENSMUSG00000039959	ENSMUSG00000039959	12	ensembl_havana	Hip1	protein_coding	Cluster0001
Hlx:ENSMUSG00000039377	ENSMUSG00000039377	7	ensembl_havana	Hlx	protein_coding	Cluster0001
Hmcn2:ENSMUSG00000055632	ENSMUSG00000055632	17	ensembl_havana	Hmcn2	protein_coding	Cluster0001
Hmgcll1:ENSMUSG00000007908	ENSMUSG00000007908	14	ensembl_havana	Hmgcll1	protein_coding	Cluster0001
Hnmt:ENSMUSG00000026986	ENSMUSG00000026986	14	ensembl_havana	Hnmt	protein_coding	Cluster0001
Hoxa5:ENSMUSG00000038253	ENSMUSG00000038253	6	ensembl_havana	Hoxa5	protein_coding	Cluster0001
Hoxa7:ENSMUSG00000038236	ENSMUSG00000038236	8	ensembl_havana	Hoxa7	protein_coding	Cluster0001
Hoxb2:ENSMUSG00000075588	ENSMUSG00000075588	6	ensembl_havana	Hoxb2	protein_coding	Cluster0001
Hoxc4:ENSMUSG00000075394	ENSMUSG00000075394	4	ensembl_havana	Hoxc4	protein_coding	Cluster0001
Hoxc6:ENSMUSG00000001661	ENSMUSG00000001661	5	ensembl_havana	Hoxc6	protein_coding	Cluster0001
Hoxc8:ENSMUSG00000001657	ENSMUSG00000001657	7	ensembl_havana	Hoxc8	protein_coding	Cluster0001
Hoxc9:ENSMUSG00000036139	ENSMUSG00000036139	6	ensembl_havana	Hoxc9	protein_coding	Cluster0001
Hoxd8:ENSMUSG00000027102	ENSMUSG00000027102	4	ensembl_havana	Hoxd8	protein_coding	Cluster0001
Hpca:ENSMUSG00000028785	ENSMUSG00000028785	12	ensembl_havana	Hpca	protein_coding	Cluster0001
Hpcal4:ENSMUSG00000046093	ENSMUSG00000046093	9	ensembl_havana	Hpcal4	protein_coding	Cluster0001
Hpse2:ENSMUSG00000074852	ENSMUSG00000074852	3	ensembl	Hpse2	protein_coding	Cluster0001
Hrasls:ENSMUSG00000022525	ENSMUSG00000022525	13	ensembl_havana	Hrasls	protein_coding	Cluster0001
Hs3st4:ENSMUSG00000078591	ENSMUSG00000078591	1	ensembl_havana	Hs3st4	protein_coding	Cluster0001
Hspa12b:ENSMUSG00000074793	ENSMUSG00000074793	10	ensembl_havana	Hspa12b	protein_coding	Cluster0001
Hspa2:ENSMUSG00000059970	ENSMUSG00000059970	6	ensembl	Hspa2	protein_coding	Cluster0001
Hspb1:ENSMUSG00000004951	ENSMUSG00000004951	10	ensembl_havana	Hspb1	protein_coding	Cluster0001
Hspb6:ENSMUSG00000036854	ENSMUSG00000036854	14	ensembl_havana	Hspb6	protein_coding	Cluster0001
Hspb7:ENSMUSG00000006221	ENSMUSG00000006221	7	ensembl_havana	Hspb7	protein_coding	Cluster0001
Hspb8:ENSMUSG00000041548	ENSMUSG00000041548	4	ensembl_havana	Hspb8	protein_coding	Cluster0001
Htr3a:ENSMUSG00000032269	ENSMUSG00000032269	7	ensembl	Htr3a	protein_coding	Cluster0001
Htr3b:ENSMUSG00000008590	ENSMUSG00000008590	4	ensembl	Htr3b	protein_coding	Cluster0001
Htra3:ENSMUSG00000029096	ENSMUSG00000029096	15	ensembl_havana	Htra3	protein_coding	Cluster0001
Ica1l:ENSMUSG00000026018	ENSMUSG00000026018	12	ensembl_havana	Ica1l	protein_coding	Cluster0001
Id4:ENSMUSG00000021379	ENSMUSG00000021379	1	ensembl	Id4	protein_coding	Cluster0001
Ifi205:ENSMUSG00000054203	ENSMUSG00000054203	7	ensembl_havana	Ifi205	protein_coding	Cluster0001
Ifitm2:ENSMUSG00000060591	ENSMUSG00000060591	8	ensembl	Ifitm2	protein_coding	Cluster0001
Ifitm3:ENSMUSG00000025492	ENSMUSG00000025492	6	ensembl_havana	Ifitm3	protein_coding	Cluster0001
Igf1:ENSMUSG00000020053	ENSMUSG00000020053	18	ensembl_havana	Igf1	protein_coding	Cluster0001
Igf1r:ENSMUSG00000005533	ENSMUSG00000005533	10	ensembl_havana	Igf1r	protein_coding	Cluster0001
Igfbp2:ENSMUSG00000039323	ENSMUSG00000039323	18	ensembl_havana	Igfbp2	protein_coding	Cluster0001
Igfbp3:ENSMUSG00000020427	ENSMUSG00000020427	11	ensembl_havana	Igfbp3	protein_coding	Cluster0001
Igfbp4:ENSMUSG00000017493	ENSMUSG00000017493	12	ensembl_havana	Igfbp4	protein_coding	Cluster0001
Igfbp5:ENSMUSG00000026185	ENSMUSG00000026185	8	ensembl_havana	Igfbp5	protein_coding	Cluster0001
Igfbp7:ENSMUSG00000036256	ENSMUSG00000036256	13	ensembl_havana	Igfbp7	protein_coding	Cluster0001
Iglon5:ENSMUSG00000013367	ENSMUSG00000013367	5	ensembl_havana	Iglon5	protein_coding	Cluster0001
Igsf10:ENSMUSG00000036334	ENSMUSG00000036334	12	ensembl_havana	Igsf10	protein_coding	Cluster0001
Il17d:ENSMUSG00000050222	ENSMUSG00000050222	10	ensembl	Il17d	protein_coding	Cluster0001
Il17re:ENSMUSG00000043088	ENSMUSG00000043088	16	ensembl_havana	Il17re	protein_coding	Cluster0001
Il1r1:ENSMUSG00000026072	ENSMUSG00000026072	12	ensembl_havana	Il1r1	protein_coding	Cluster0001
Ildr2:ENSMUSG00000040612	ENSMUSG00000040612	13	ensembl_havana	Ildr2	protein_coding	Cluster0001
Ina:ENSMUSG00000034336	ENSMUSG00000034336	3	ensembl_havana	Ina	protein_coding	Cluster0001
Irs1:ENSMUSG00000055980	ENSMUSG00000055980	2	ensembl_havana	Irs1	protein_coding	Cluster0001
Islr:ENSMUSG00000037206	ENSMUSG00000037206	14	ensembl	Islr	protein_coding	Cluster0001
Itga11:ENSMUSG00000032243	ENSMUSG00000032243	8	ensembl_havana	Itga11	protein_coding	Cluster0001
Itga7:ENSMUSG00000025348	ENSMUSG00000025348	8	ensembl	Itga7	protein_coding	Cluster0001
Itga8:ENSMUSG00000026768	ENSMUSG00000026768	10	ensembl_havana	Itga8	protein_coding	Cluster0001
Itga9:ENSMUSG00000039115	ENSMUSG00000039115	13	ensembl_havana	Itga9	protein_coding	Cluster0001
Itgb1:ENSMUSG00000025809	ENSMUSG00000025809	15	ensembl_havana	Itgb1	protein_coding	Cluster0001
Jam2:ENSMUSG00000053062	ENSMUSG00000053062	15	ensembl_havana	Jam2	protein_coding	Cluster0001
Jam3:ENSMUSG00000031990	ENSMUSG00000031990	14	ensembl_havana	Jam3	protein_coding	Cluster0001
Jazf1:ENSMUSG00000063568	ENSMUSG00000063568	11	ensembl_havana	Jazf1	protein_coding	Cluster0001
Jmy:ENSMUSG00000021690	ENSMUSG00000021690	9	ensembl	Jmy	protein_coding	Cluster0001
Jph2:ENSMUSG00000017817	ENSMUSG00000017817	11	ensembl_havana	Jph2	protein_coding	Cluster0001
Jph3:ENSMUSG00000025318	ENSMUSG00000025318	13	ensembl_havana	Jph3	protein_coding	Cluster0001
Jph4:ENSMUSG00000022208	ENSMUSG00000022208	11	ensembl_havana	Jph4	protein_coding	Cluster0001
Kank1:ENSMUSG00000032702	ENSMUSG00000032702	16	ensembl_havana	Kank1	protein_coding	Cluster0001
Kank2:ENSMUSG00000032194	ENSMUSG00000032194	8	ensembl	Kank2	protein_coding	Cluster0001
Kank4:ENSMUSG00000035407	ENSMUSG00000035407	8	ensembl_havana	Kank4	protein_coding	Cluster0001
Kazald1:ENSMUSG00000025213	ENSMUSG00000025213	11	ensembl_havana	Kazald1	protein_coding	Cluster0001
Kcna2:ENSMUSG00000040724	ENSMUSG00000040724	5	ensembl_havana	Kcna2	protein_coding	Cluster0001
Kcna5:ENSMUSG00000045534	ENSMUSG00000045534	4	ensembl_havana	Kcna5	protein_coding	Cluster0001
Kcna6:ENSMUSG00000038077	ENSMUSG00000038077	7	ensembl_havana	Kcna6	protein_coding	Cluster0001
Kcnab1:ENSMUSG00000027827	ENSMUSG00000027827	16	ensembl_havana	Kcnab1	protein_coding	Cluster0001
Kcnb1:ENSMUSG00000050556	ENSMUSG00000050556	9	ensembl_havana	Kcnb1	protein_coding	Cluster0001
Kcnc2:ENSMUSG00000035681	ENSMUSG00000035681	6	ensembl	Kcnc2	protein_coding	Cluster0001
Kcnc4:ENSMUSG00000027895	ENSMUSG00000027895	9	ensembl_havana	Kcnc4	protein_coding	Cluster0001
Kcnd2:ENSMUSG00000060882	ENSMUSG00000060882	5	ensembl_havana	Kcnd2	protein_coding	Cluster0001
Kcnd3:ENSMUSG00000040896	ENSMUSG00000040896	16	ensembl_havana	Kcnd3	protein_coding	Cluster0001
Kcne4:ENSMUSG00000047330	ENSMUSG00000047330	8	ensembl_havana	Kcne4	protein_coding	Cluster0001
Kcnf1:ENSMUSG00000051726	ENSMUSG00000051726	6	ensembl_havana	Kcnf1	protein_coding	Cluster0001
Kcng1:ENSMUSG00000074575	ENSMUSG00000074575	4	ensembl_havana	Kcng1	protein_coding	Cluster0001
Kcnh2:ENSMUSG00000038319	ENSMUSG00000038319	14	ensembl_havana	Kcnh2	protein_coding	Cluster0001
Kcnip2:ENSMUSG00000025221	ENSMUSG00000025221	15	ensembl_havana	Kcnip2	protein_coding	Cluster0001
Kcnip4:ENSMUSG00000029088	ENSMUSG00000029088	16	ensembl_havana	Kcnip4	protein_coding	Cluster0001
Kcnj10:ENSMUSG00000044708	ENSMUSG00000044708	5	ensembl_havana	Kcnj10	protein_coding	Cluster0001
Kcnj12:ENSMUSG00000042529	ENSMUSG00000042529	14	ensembl_havana	Kcnj12	protein_coding	Cluster0001
Kcnj5:ENSMUSG00000032034	ENSMUSG00000032034	5	ensembl	Kcnj5	protein_coding	Cluster0001
Kcnj8:ENSMUSG00000030247	ENSMUSG00000030247	9	ensembl_havana	Kcnj8	protein_coding	Cluster0001
Kcnk13:ENSMUSG00000045404	ENSMUSG00000045404	15	ensembl_havana	Kcnk13	protein_coding	Cluster0001
Kcnk2:ENSMUSG00000037624	ENSMUSG00000037624	15	ensembl_havana	Kcnk2	protein_coding	Cluster0001
Kcnk3:ENSMUSG00000049265	ENSMUSG00000049265	7	ensembl_havana	Kcnk3	protein_coding	Cluster0001
Kcnma1:ENSMUSG00000063142	ENSMUSG00000063142	13	ensembl_havana	Kcnma1	protein_coding	Cluster0001
Kcnmb1:ENSMUSG00000020155	ENSMUSG00000020155	2	ensembl_havana	Kcnmb1	protein_coding	Cluster0001
Kcnn3:ENSMUSG00000000794	ENSMUSG00000000794	9	ensembl_havana	Kcnn3	protein_coding	Cluster0001
Kcnq2:ENSMUSG00000016346	ENSMUSG00000016346	17	ensembl_havana	Kcnq2	protein_coding	Cluster0001
Kcnq3:ENSMUSG00000056258	ENSMUSG00000056258	8	ensembl_havana	Kcnq3	protein_coding	Cluster0001
Kcnq4:ENSMUSG00000028631	ENSMUSG00000028631	7	ensembl_havana	Kcnq4	protein_coding	Cluster0001
Kcnt2:ENSMUSG00000052726	ENSMUSG00000052726	15	ensembl_havana	Kcnt2	protein_coding	Cluster0001
Kctd12b:ENSMUSG00000041633	ENSMUSG00000041633	14	ensembl_havana	Kctd12b	protein_coding	Cluster0001
Kctd15:ENSMUSG00000030499	ENSMUSG00000030499	9	ensembl_havana	Kctd15	protein_coding	Cluster0001
Kctd17:ENSMUSG00000033287	ENSMUSG00000033287	15	ensembl_havana	Kctd17	protein_coding	Cluster0001
Kdelc2:ENSMUSG00000034487	ENSMUSG00000034487	3	ensembl	Kdelc2	protein_coding	Cluster0001
Kdm1b:ENSMUSG00000038080	ENSMUSG00000038080	16	ensembl_havana	Kdm1b	protein_coding	Cluster0001
Kdr:ENSMUSG00000062960	ENSMUSG00000062960	10	ensembl_havana	Kdr	protein_coding	Cluster0001
Khdrbs3:ENSMUSG00000022332	ENSMUSG00000022332	7	ensembl	Khdrbs3	protein_coding	Cluster0001
Kif1a:ENSMUSG00000014602	ENSMUSG00000014602	15	ensembl_havana	Kif1a	protein_coding	Cluster0001
Kif26b:ENSMUSG00000026494	ENSMUSG00000026494	12	ensembl_havana	Kif26b	protein_coding	Cluster0001
Kif5a:ENSMUSG00000074657	ENSMUSG00000074657	4	ensembl	Kif5a	protein_coding	Cluster0001
Kif5c:ENSMUSG00000026764	ENSMUSG00000026764	15	ensembl_havana	Kif5c	protein_coding	Cluster0001
Kif7:ENSMUSG00000050382	ENSMUSG00000050382	14	ensembl_havana	Kif7	protein_coding	Cluster0001
Kirrel:ENSMUSG00000041734	ENSMUSG00000041734	15	ensembl_havana	Kirrel	protein_coding	Cluster0001
Klhdc8b:ENSMUSG00000032609	ENSMUSG00000032609	12	ensembl_havana	Klhdc8b	protein_coding	Cluster0001
Klhl13:ENSMUSG00000036782	ENSMUSG00000036782	13	ensembl_havana	Klhl13	protein_coding	Cluster0001
Klhl23:ENSMUSG00000042155	ENSMUSG00000042155	3	ensembl_havana	Klhl23	protein_coding	Cluster0001
Klhl29:ENSMUSG00000020627	ENSMUSG00000020627	9	ensembl	Klhl29	protein_coding	Cluster0001
Klhl30:ENSMUSG00000026308	ENSMUSG00000026308	8	ensembl_havana	Klhl30	protein_coding	Cluster0001
Klhl32:ENSMUSG00000040387	ENSMUSG00000040387	16	ensembl_havana	Klhl32	protein_coding	Cluster0001
Klhl38:ENSMUSG00000022357	ENSMUSG00000022357	2	ensembl_havana	Klhl38	protein_coding	Cluster0001
Klhl8:ENSMUSG00000029312	ENSMUSG00000029312	12	ensembl_havana	Klhl8	protein_coding	Cluster0001
Krt17:ENSMUSG00000035557	ENSMUSG00000035557	9	ensembl_havana	Krt17	protein_coding	Cluster0001
Lama1:ENSMUSG00000032796	ENSMUSG00000032796	7	ensembl	Lama1	protein_coding	Cluster0001
Lama2:ENSMUSG00000019899	ENSMUSG00000019899	15	ensembl_havana	Lama2	protein_coding	Cluster0001
Lama4:ENSMUSG00000019846	ENSMUSG00000019846	11	ensembl_havana	Lama4	protein_coding	Cluster0001
Lamb1:ENSMUSG00000002900	ENSMUSG00000002900	15	ensembl_havana	Lamb1	protein_coding	Cluster0001
Lamb2:ENSMUSG00000052911	ENSMUSG00000052911	9	ensembl_havana	Lamb2	protein_coding	Cluster0001
Lamc3:ENSMUSG00000026840	ENSMUSG00000026840	14	ensembl_havana	Lamc3	protein_coding	Cluster0001
Larp6:ENSMUSG00000034839	ENSMUSG00000034839	5	ensembl_havana	Larp6	protein_coding	Cluster0001
Layn:ENSMUSG00000060594	ENSMUSG00000060594	5	ensembl	Layn	protein_coding	Cluster0001
Ldb2:ENSMUSG00000039706	ENSMUSG00000039706	11	ensembl_havana	Ldb2	protein_coding	Cluster0001
Ldhb:ENSMUSG00000030246	ENSMUSG00000030246	11	ensembl_havana	Ldhb	protein_coding	Cluster0001
Lepr:ENSMUSG00000057722	ENSMUSG00000057722	17	ensembl_havana	Lepr	protein_coding	Cluster0001
Lgi2:ENSMUSG00000039252	ENSMUSG00000039252	11	ensembl_havana	Lgi2	protein_coding	Cluster0001
Lgi4:ENSMUSG00000036560	ENSMUSG00000036560	14	ensembl_havana	Lgi4	protein_coding	Cluster0001
Lgmn:ENSMUSG00000021190	ENSMUSG00000021190	14	ensembl_havana	Lgmn	protein_coding	Cluster0001
Lhfp:ENSMUSG00000048332	ENSMUSG00000048332	13	ensembl_havana	Lhfp	protein_coding	Cluster0001
Lhfpl5:ENSMUSG00000062252	ENSMUSG00000062252	8	ensembl_havana	Lhfpl5	protein_coding	Cluster0001
Lifr:ENSMUSG00000054263	ENSMUSG00000054263	11	ensembl	Lifr	protein_coding	Cluster0001
Limch1:ENSMUSG00000037736	ENSMUSG00000037736	18	ensembl_havana	Limch1	protein_coding	Cluster0001
Lims2:ENSMUSG00000024395	ENSMUSG00000024395	7	ensembl	Lims2	protein_coding	Cluster0001
Lin7b:ENSMUSG00000003872	ENSMUSG00000003872	8	ensembl	Lin7b	protein_coding	Cluster0001
Lix1:ENSMUSG00000047786	ENSMUSG00000047786	12	ensembl_havana	Lix1	protein_coding	Cluster0001
Lix1l:ENSMUSG00000049288	ENSMUSG00000049288	4	ensembl_havana	Lix1l	protein_coding	Cluster0001
Lmod1:ENSMUSG00000048096	ENSMUSG00000048096	7	ensembl_havana	Lmod1	protein_coding	Cluster0001
Lonrf2:ENSMUSG00000048814	ENSMUSG00000048814	10	ensembl_havana	Lonrf2	protein_coding	Cluster0001
Loxl1:ENSMUSG00000032334	ENSMUSG00000032334	9	ensembl	Loxl1	protein_coding	Cluster0001
Loxl2:ENSMUSG00000034205	ENSMUSG00000034205	16	ensembl_havana	Loxl2	protein_coding	Cluster0001
Loxl4:ENSMUSG00000025185	ENSMUSG00000025185	14	ensembl_havana	Loxl4	protein_coding	Cluster0001
Lrch2:ENSMUSG00000031290	ENSMUSG00000031290	14	ensembl_havana	Lrch2	protein_coding	Cluster0001
Lrfn1:ENSMUSG00000030600	ENSMUSG00000030600	15	ensembl_havana	Lrfn1	protein_coding	Cluster0001
Lrig1:ENSMUSG00000030029	ENSMUSG00000030029	14	ensembl_havana	Lrig1	protein_coding	Cluster0001
Lrp11:ENSMUSG00000019796	ENSMUSG00000019796	12	ensembl_havana	Lrp11	protein_coding	Cluster0001
Lrp3:ENSMUSG00000001802	ENSMUSG00000001802	16	ensembl_havana	Lrp3	protein_coding	Cluster0001
Lrrc14b:ENSMUSG00000021579	ENSMUSG00000021579	4	ensembl_havana	Lrrc14b	protein_coding	Cluster0001
Lrrc32:ENSMUSG00000090958	ENSMUSG00000090958	2	ensembl_havana	Lrrc32	protein_coding	Cluster0001
Lrrc49:ENSMUSG00000047766	ENSMUSG00000047766	15	ensembl_havana	Lrrc49	protein_coding	Cluster0001
Lrrc4b:ENSMUSG00000047085	ENSMUSG00000047085	14	ensembl_havana	Lrrc4b	protein_coding	Cluster0001
Lrrc4c:ENSMUSG00000050587	ENSMUSG00000050587	14	ensembl_havana	Lrrc4c	protein_coding	Cluster0001
Lrrc55:ENSMUSG00000075224	ENSMUSG00000075224	8	ensembl	Lrrc55	protein_coding	Cluster0001
Lrrn2:ENSMUSG00000026443	ENSMUSG00000026443	3	ensembl_havana	Lrrn2	protein_coding	Cluster0001
Lrrn3:ENSMUSG00000036295	ENSMUSG00000036295	4	ensembl	Lrrn3	protein_coding	Cluster0001
Lrrn4cl:ENSMUSG00000071656	ENSMUSG00000071656	6	ensembl	Lrrn4cl	protein_coding	Cluster0001
Lrrtm1:ENSMUSG00000060780	ENSMUSG00000060780	2	ensembl_havana	Lrrtm1	protein_coding	Cluster0001
Lsamp:ENSMUSG00000061080	ENSMUSG00000061080	11	ensembl_havana	Lsamp	protein_coding	Cluster0001
Ltbp1:ENSMUSG00000001870	ENSMUSG00000001870	15	ensembl_havana	Ltbp1	protein_coding	Cluster0001
Ltbp3:ENSMUSG00000024940	ENSMUSG00000024940	10	ensembl	Ltbp3	protein_coding	Cluster0001
Ltbp4:ENSMUSG00000040488	ENSMUSG00000040488	16	ensembl_havana	Ltbp4	protein_coding	Cluster0001
Lum:ENSMUSG00000036446	ENSMUSG00000036446	4	ensembl	Lum	protein_coding	Cluster0001
Lurap1:ENSMUSG00000028701	ENSMUSG00000028701	4	ensembl_havana	Lurap1	protein_coding	Cluster0001
Ly6c1:ENSMUSG00000079018	ENSMUSG00000079018	10	ensembl_havana	Ly6c1	protein_coding	Cluster0001
Mab21l1:ENSMUSG00000056947	ENSMUSG00000056947	5	ensembl_havana	Mab21l1	protein_coding	Cluster0001
Mab21l2:ENSMUSG00000057777	ENSMUSG00000057777	4	ensembl_havana	Mab21l2	protein_coding	Cluster0001
Maged1:ENSMUSG00000025151	ENSMUSG00000025151	16	ensembl_havana	Maged1	protein_coding	Cluster0001
Magee1:ENSMUSG00000031227	ENSMUSG00000031227	8	ensembl_havana	Magee1	protein_coding	Cluster0001
Mageh1:ENSMUSG00000047238	ENSMUSG00000047238	4	ensembl_havana	Mageh1	protein_coding	Cluster0001
Mamdc2:ENSMUSG00000033207	ENSMUSG00000033207	6	ensembl	Mamdc2	protein_coding	Cluster0001
Map1b:ENSMUSG00000052727	ENSMUSG00000052727	5	ensembl	Map1b	protein_coding	Cluster0001
Map4k5:ENSMUSG00000034761	ENSMUSG00000034761	15	ensembl_havana	Map4k5	protein_coding	Cluster0001
Map7d2:ENSMUSG00000041020	ENSMUSG00000041020	14	ensembl_havana	Map7d2	protein_coding	Cluster0001
Mapk10:ENSMUSG00000046709	ENSMUSG00000046709	16	ensembl_havana	Mapk10	protein_coding	Cluster0001
Mapk8ip1:ENSMUSG00000027223	ENSMUSG00000027223	15	ensembl_havana	Mapk8ip1	protein_coding	Cluster0001
Mapk8ip2:ENSMUSG00000022619	ENSMUSG00000022619	5	ensembl_havana	Mapk8ip2	protein_coding	Cluster0001
Mapt:ENSMUSG00000018411	ENSMUSG00000018411	17	ensembl_havana	Mapt	protein_coding	Cluster0001
Mark1:ENSMUSG00000026620	ENSMUSG00000026620	11	ensembl_havana	Mark1	protein_coding	Cluster0001
Marveld1:ENSMUSG00000044345	ENSMUSG00000044345	9	ensembl_havana	Marveld1	protein_coding	Cluster0001
Mast1:ENSMUSG00000053693	ENSMUSG00000053693	16	ensembl_havana	Mast1	protein_coding	Cluster0001
Mcam:ENSMUSG00000032135	ENSMUSG00000032135	14	ensembl_havana	Mcam	protein_coding	Cluster0001
Meis1:ENSMUSG00000020160	ENSMUSG00000020160	18	ensembl_havana	Meis1	protein_coding	Cluster0001
Meox2:ENSMUSG00000036144	ENSMUSG00000036144	6	ensembl_havana	Meox2	protein_coding	Cluster0001
Mettl24:ENSMUSG00000045555	ENSMUSG00000045555	3	ensembl_havana	Mettl24	protein_coding	Cluster0001
Mfap2:ENSMUSG00000060572	ENSMUSG00000060572	17	ensembl_havana	Mfap2	protein_coding	Cluster0001
Mfap3l:ENSMUSG00000031647	ENSMUSG00000031647	10	ensembl_havana	Mfap3l	protein_coding	Cluster0001
Mfap4:ENSMUSG00000042436	ENSMUSG00000042436	12	ensembl_havana	Mfap4	protein_coding	Cluster0001
Mgl2:ENSMUSG00000040950	ENSMUSG00000040950	13	ensembl_havana	Mgl2	protein_coding	Cluster0001
Mgll:ENSMUSG00000033174	ENSMUSG00000033174	17	ensembl_havana	Mgll	protein_coding	Cluster0001
Micu3:ENSMUSG00000039478	ENSMUSG00000039478	15	ensembl_havana	Micu3	protein_coding	Cluster0001
Mir143hg:ENSMUSG00000097324	ENSMUSG00000097324	8	havana	Mir143hg	lincRNA	Cluster0001
Mkx:ENSMUSG00000061013	ENSMUSG00000061013	5	ensembl_havana	Mkx	protein_coding	Cluster0001
Mmd2:ENSMUSG00000039533	ENSMUSG00000039533	8	ensembl_havana	Mmd2	protein_coding	Cluster0001
Mmp11:ENSMUSG00000000901	ENSMUSG00000000901	15	ensembl_havana	Mmp11	protein_coding	Cluster0001
Mmp16:ENSMUSG00000028226	ENSMUSG00000028226	15	ensembl_havana	Mmp16	protein_coding	Cluster0001
Mmp17:ENSMUSG00000029436	ENSMUSG00000029436	9	ensembl_havana	Mmp17	protein_coding	Cluster0001
Mmp19:ENSMUSG00000025355	ENSMUSG00000025355	6	ensembl	Mmp19	protein_coding	Cluster0001
Mmp2:ENSMUSG00000031740	ENSMUSG00000031740	7	ensembl	Mmp2	protein_coding	Cluster0001
Mmrn1:ENSMUSG00000054641	ENSMUSG00000054641	10	ensembl_havana	Mmrn1	protein_coding	Cluster0001
Mmrn2:ENSMUSG00000041445	ENSMUSG00000041445	8	ensembl	Mmrn2	protein_coding	Cluster0001
Mn1:ENSMUSG00000070576	ENSMUSG00000070576	4	ensembl_havana	Mn1	protein_coding	Cluster0001
Morn4:ENSMUSG00000049670	ENSMUSG00000049670	8	ensembl	Morn4	protein_coding	Cluster0001
Moxd1:ENSMUSG00000020000	ENSMUSG00000020000	7	ensembl_havana	Moxd1	protein_coding	Cluster0001
Mpdz:ENSMUSG00000028402	ENSMUSG00000028402	17	ensembl_havana	Mpdz	protein_coding	Cluster0001
Mpp2:ENSMUSG00000017314	ENSMUSG00000017314	12	ensembl_havana	Mpp2	protein_coding	Cluster0001
Mr1:ENSMUSG00000026471	ENSMUSG00000026471	14	ensembl_havana	Mr1	protein_coding	Cluster0001
Mrap2:ENSMUSG00000042761	ENSMUSG00000042761	14	ensembl_havana	Mrap2	protein_coding	Cluster0001
Mras:ENSMUSG00000032470	ENSMUSG00000032470	16	ensembl_havana	Mras	protein_coding	Cluster0001
Mrc2:ENSMUSG00000020695	ENSMUSG00000020695	14	ensembl_havana	Mrc2	protein_coding	Cluster0001
Mrgprf:ENSMUSG00000031070	ENSMUSG00000031070	15	ensembl_havana	Mrgprf	protein_coding	Cluster0001
Mrvi1:ENSMUSG00000005611	ENSMUSG00000005611	15	ensembl_havana	Mrvi1	protein_coding	Cluster0001
Ms4a4a:ENSMUSG00000101389	ENSMUSG00000101389	1	havana	Ms4a4a	protein_coding	Cluster0001
Ms4a4d:ENSMUSG00000024678	ENSMUSG00000024678	6	ensembl_havana	Ms4a4d	protein_coding	Cluster0001
Msrb3:ENSMUSG00000051236	ENSMUSG00000051236	13	ensembl_havana	Msrb3	protein_coding	Cluster0001
Mtcl1:ENSMUSG00000052105	ENSMUSG00000052105	16	ensembl_havana	Mtcl1	protein_coding	Cluster0001
Mtss1l:ENSMUSG00000033763	ENSMUSG00000033763	14	ensembl_havana	Mtss1l	protein_coding	Cluster0001
Mturn:ENSMUSG00000038065	ENSMUSG00000038065	13	ensembl_havana	Mturn	protein_coding	Cluster0001
Musk:ENSMUSG00000057280	ENSMUSG00000057280	15	ensembl_havana	Musk	protein_coding	Cluster0001
Mustn1:ENSMUSG00000042485	ENSMUSG00000042485	6	ensembl	Mustn1	protein_coding	Cluster0001
Mxra8:ENSMUSG00000029070	ENSMUSG00000029070	9	ensembl_havana	Mxra8	protein_coding	Cluster0001
Myh10:ENSMUSG00000020900	ENSMUSG00000020900	15	ensembl_havana	Myh10	protein_coding	Cluster0001
Myh11:ENSMUSG00000018830	ENSMUSG00000018830	8	ensembl	Myh11	protein_coding	Cluster0001
Myl1:ENSMUSG00000061816	ENSMUSG00000061816	15	ensembl_havana	Myl1	protein_coding	Cluster0001
Myl9:ENSMUSG00000067818	ENSMUSG00000067818	6	ensembl_havana	Myl9	protein_coding	Cluster0001
Mylk:ENSMUSG00000022836	ENSMUSG00000022836	10	ensembl_havana	Mylk	protein_coding	Cluster0001
Myo9a:ENSMUSG00000039585	ENSMUSG00000039585	15	ensembl_havana	Myo9a	protein_coding	Cluster0001
Myocd:ENSMUSG00000020542	ENSMUSG00000020542	18	ensembl_havana	Myocd	protein_coding	Cluster0001
Myof:ENSMUSG00000048612	ENSMUSG00000048612	15	ensembl	Myof	protein_coding	Cluster0001
Myom1:ENSMUSG00000024049	ENSMUSG00000024049	14	ensembl	Myom1	protein_coding	Cluster0001
Naalad2:ENSMUSG00000043943	ENSMUSG00000043943	14	ensembl_havana	Naalad2	protein_coding	Cluster0001
Nacad:ENSMUSG00000041073	ENSMUSG00000041073	10	ensembl_havana	Nacad	protein_coding	Cluster0001
Nalcn:ENSMUSG00000000197	ENSMUSG00000000197	7	ensembl	Nalcn	protein_coding	Cluster0001
Nap1l3:ENSMUSG00000055733	ENSMUSG00000055733	6	ensembl_havana	Nap1l3	protein_coding	Cluster0001
Nap1l5:ENSMUSG00000055430	ENSMUSG00000055430	4	ensembl_havana	Nap1l5	protein_coding	Cluster0001
Napb:ENSMUSG00000027438	ENSMUSG00000027438	14	ensembl_havana	Napb	protein_coding	Cluster0001
Ncam1:ENSMUSG00000039542	ENSMUSG00000039542	15	ensembl_havana	Ncam1	protein_coding	Cluster0001
Ncam2:ENSMUSG00000022762	ENSMUSG00000022762	17	ensembl_havana	Ncam2	protein_coding	Cluster0001
Ncs1:ENSMUSG00000062661	ENSMUSG00000062661	6	ensembl_havana	Ncs1	protein_coding	Cluster0001
Ndn:ENSMUSG00000033585	ENSMUSG00000033585	5	ensembl_havana	Ndn	protein_coding	Cluster0001
Ndrg4:ENSMUSG00000036564	ENSMUSG00000036564	16	ensembl_havana	Ndrg4	protein_coding	Cluster0001
Necab1:ENSMUSG00000040536	ENSMUSG00000040536	15	ensembl_havana	Necab1	protein_coding	Cluster0001
Necab2:ENSMUSG00000031837	ENSMUSG00000031837	13	ensembl_havana	Necab2	protein_coding	Cluster0001
Nefl:ENSMUSG00000022055	ENSMUSG00000022055	7	ensembl_havana	Nefl	protein_coding	Cluster0001
Nefm:ENSMUSG00000022054	ENSMUSG00000022054	11	ensembl_havana	Nefm	protein_coding	Cluster0001
Negr1:ENSMUSG00000040037	ENSMUSG00000040037	13	ensembl_havana	Negr1	protein_coding	Cluster0001
Nell1:ENSMUSG00000055409	ENSMUSG00000055409	14	ensembl_havana	Nell1	protein_coding	Cluster0001
Nell2:ENSMUSG00000022454	ENSMUSG00000022454	16	ensembl	Nell2	protein_coding	Cluster0001
Nes:ENSMUSG00000004891	ENSMUSG00000004891	16	ensembl_havana	Nes	protein_coding	Cluster0001
Nexn:ENSMUSG00000039103	ENSMUSG00000039103	12	ensembl_havana	Nexn	protein_coding	Cluster0001
Nfatc4:ENSMUSG00000023411	ENSMUSG00000023411	11	ensembl	Nfatc4	protein_coding	Cluster0001
Ngb:ENSMUSG00000021032	ENSMUSG00000021032	13	ensembl_havana	Ngb	protein_coding	Cluster0001
Ngf:ENSMUSG00000027859	ENSMUSG00000027859	10	ensembl_havana	Ngf	protein_coding	Cluster0001
Nhsl2:ENSMUSG00000079481	ENSMUSG00000079481	11	ensembl_havana	Nhsl2	protein_coding	Cluster0001
Nid1:ENSMUSG00000005397	ENSMUSG00000005397	7	ensembl	Nid1	protein_coding	Cluster0001
Nipa1:ENSMUSG00000047037	ENSMUSG00000047037	5	ensembl_havana	Nipa1	protein_coding	Cluster0001
Nipal4:ENSMUSG00000020411	ENSMUSG00000020411	2	ensembl_havana	Nipal4	protein_coding	Cluster0001
Nkd1:ENSMUSG00000031661	ENSMUSG00000031661	11	ensembl	Nkd1	protein_coding	Cluster0001
Nkd2:ENSMUSG00000021567	ENSMUSG00000021567	14	ensembl_havana	Nkd2	protein_coding	Cluster0001
Nkx2-3:ENSMUSG00000044220	ENSMUSG00000044220	13	ensembl_havana	Nkx2-3	protein_coding	Cluster0001
Nkx3-2:ENSMUSG00000049691	ENSMUSG00000049691	8	ensembl_havana	Nkx3-2	protein_coding	Cluster0001
Nlgn2:ENSMUSG00000051790	ENSMUSG00000051790	15	ensembl_havana	Nlgn2	protein_coding	Cluster0001
Nme5:ENSMUSG00000035984	ENSMUSG00000035984	14	ensembl_havana	Nme5	protein_coding	Cluster0001
Nmnat2:ENSMUSG00000042751	ENSMUSG00000042751	14	ensembl_havana	Nmnat2	protein_coding	Cluster0001
Nmur1:ENSMUSG00000026237	ENSMUSG00000026237	3	ensembl_havana	Nmur1	protein_coding	Cluster0001
Nog:ENSMUSG00000048616	ENSMUSG00000048616	4	ensembl_havana	Nog	protein_coding	Cluster0001
Nol3:ENSMUSG00000014776	ENSMUSG00000014776	6	ensembl	Nol3	protein_coding	Cluster0001
Nos1:ENSMUSG00000029361	ENSMUSG00000029361	18	ensembl_havana	Nos1	protein_coding	Cluster0001
Nos3:ENSMUSG00000028978	ENSMUSG00000028978	12	ensembl_havana	Nos3	protein_coding	Cluster0001
Notch3:ENSMUSG00000038146	ENSMUSG00000038146	7	ensembl_havana	Notch3	protein_coding	Cluster0001
Nphp1:ENSMUSG00000027378	ENSMUSG00000027378	16	ensembl_havana	Nphp1	protein_coding	Cluster0001
Npnt:ENSMUSG00000040998	ENSMUSG00000040998	18	ensembl_havana	Npnt	protein_coding	Cluster0001
Npr1:ENSMUSG00000027931	ENSMUSG00000027931	12	ensembl_havana	Npr1	protein_coding	Cluster0001
Npr2:ENSMUSG00000028469	ENSMUSG00000028469	15	ensembl_havana	Npr2	protein_coding	Cluster0001
Nptx1:ENSMUSG00000025582	ENSMUSG00000025582	4	ensembl_havana	Nptx1	protein_coding	Cluster0001
Nptx2:ENSMUSG00000059991	ENSMUSG00000059991	7	ensembl_havana	Nptx2	protein_coding	Cluster0001
Nptxr:ENSMUSG00000022421	ENSMUSG00000022421	18	ensembl_havana	Nptxr	protein_coding	Cluster0001
Npy1r:ENSMUSG00000036437	ENSMUSG00000036437	5	ensembl	Npy1r	protein_coding	Cluster0001
Npy2r:ENSMUSG00000028004	ENSMUSG00000028004	12	ensembl_havana	Npy2r	protein_coding	Cluster0001
Npy4r:ENSMUSG00000048337	ENSMUSG00000048337	3	ensembl	Npy4r	protein_coding	Cluster0001
Nr2f1:ENSMUSG00000069171	ENSMUSG00000069171	13	ensembl_havana	Nr2f1	protein_coding	Cluster0001
Nr2f2:ENSMUSG00000030551	ENSMUSG00000030551	14	ensembl_havana	Nr2f2	protein_coding	Cluster0001
Nrbp2:ENSMUSG00000075590	ENSMUSG00000075590	2	ensembl	Nrbp2	protein_coding	Cluster0001
Nrp1:ENSMUSG00000025810	ENSMUSG00000025810	8	ensembl	Nrp1	protein_coding	Cluster0001
Nrp2:ENSMUSG00000025969	ENSMUSG00000025969	15	ensembl_havana	Nrp2	protein_coding	Cluster0001
Nrsn1:ENSMUSG00000048978	ENSMUSG00000048978	13	ensembl_havana	Nrsn1	protein_coding	Cluster0001
Nrsn2:ENSMUSG00000059361	ENSMUSG00000059361	6	ensembl_havana	Nrsn2	protein_coding	Cluster0001
Nsg1:ENSMUSG00000029126	ENSMUSG00000029126	7	ensembl_havana	Nsg1	protein_coding	Cluster0001
Nsg2:ENSMUSG00000020297	ENSMUSG00000020297	10	ensembl_havana	Nsg2	protein_coding	Cluster0001
Nt5c1a:ENSMUSG00000054958	ENSMUSG00000054958	6	ensembl_havana	Nt5c1a	protein_coding	Cluster0001
Ntn1:ENSMUSG00000020902	ENSMUSG00000020902	12	ensembl_havana	Ntn1	protein_coding	Cluster0001
Ntsr1:ENSMUSG00000027568	ENSMUSG00000027568	9	ensembl_havana	Ntsr1	protein_coding	Cluster0001
Numbl:ENSMUSG00000063160	ENSMUSG00000063160	12	ensembl_havana	Numbl	protein_coding	Cluster0001
Nxn:ENSMUSG00000020844	ENSMUSG00000020844	6	ensembl_havana	Nxn	protein_coding	Cluster0001
Nxpe5:ENSMUSG00000047592	ENSMUSG00000047592	17	ensembl_havana	Nxpe5	protein_coding	Cluster0001
Nynrin:ENSMUSG00000075592	ENSMUSG00000075592	9	ensembl	Nynrin	protein_coding	Cluster0001
Oas1d:ENSMUSG00000032623	ENSMUSG00000032623	9	ensembl_havana	Oas1d	protein_coding	Cluster0001
Obsl1:ENSMUSG00000026211	ENSMUSG00000026211	17	ensembl_havana	Obsl1	protein_coding	Cluster0001
Ogdhl:ENSMUSG00000021913	ENSMUSG00000021913	7	ensembl	Ogdhl	protein_coding	Cluster0001
Ogn:ENSMUSG00000021390	ENSMUSG00000021390	5	ensembl	Ogn	protein_coding	Cluster0001
Olfm1:ENSMUSG00000026833	ENSMUSG00000026833	18	ensembl_havana	Olfm1	protein_coding	Cluster0001
Olfm2:ENSMUSG00000032172	ENSMUSG00000032172	7	ensembl	Olfm2	protein_coding	Cluster0001
Olfml1:ENSMUSG00000051041	ENSMUSG00000051041	7	ensembl_havana	Olfml1	protein_coding	Cluster0001
Olfml2a:ENSMUSG00000046618	ENSMUSG00000046618	7	ensembl_havana	Olfml2a	protein_coding	Cluster0001
Olfml3:ENSMUSG00000027848	ENSMUSG00000027848	12	ensembl_havana	Olfml3	protein_coding	Cluster0001
Olfr558:ENSMUSG00000070423	ENSMUSG00000070423	3	ensembl	Olfr558	protein_coding	Cluster0001
Opcml:ENSMUSG00000062257	ENSMUSG00000062257	12	ensembl_havana	Opcml	protein_coding	Cluster0001
Oprk1:ENSMUSG00000025905	ENSMUSG00000025905	13	ensembl_havana	Oprk1	protein_coding	Cluster0001
Oprl1:ENSMUSG00000027584	ENSMUSG00000027584	16	ensembl_havana	Oprl1	protein_coding	Cluster0001
Optc:ENSMUSG00000010311	ENSMUSG00000010311	15	ensembl_havana	Optc	protein_coding	Cluster0001
Osr1:ENSMUSG00000048387	ENSMUSG00000048387	7	ensembl	Osr1	protein_coding	Cluster0001
P2rx6:ENSMUSG00000022758	ENSMUSG00000022758	12	ensembl_havana	P2rx6	protein_coding	Cluster0001
P2ry14:ENSMUSG00000036381	ENSMUSG00000036381	13	ensembl_havana	P2ry14	protein_coding	Cluster0001
P2ry6:ENSMUSG00000048779	ENSMUSG00000048779	5	ensembl_havana	P2ry6	protein_coding	Cluster0001
P3h1:ENSMUSG00000028641	ENSMUSG00000028641	16	ensembl_havana	P3h1	protein_coding	Cluster0001
P3h2:ENSMUSG00000038168	ENSMUSG00000038168	5	ensembl_havana	P3h2	protein_coding	Cluster0001
P3h3:ENSMUSG00000023191	ENSMUSG00000023191	9	ensembl_havana	P3h3	protein_coding	Cluster0001
P4ha2:ENSMUSG00000018906	ENSMUSG00000018906	14	ensembl_havana	P4ha2	protein_coding	Cluster0001
P4htm:ENSMUSG00000006675	ENSMUSG00000006675	10	ensembl_havana	P4htm	protein_coding	Cluster0001
Pam:ENSMUSG00000026335	ENSMUSG00000026335	16	ensembl_havana	Pam	protein_coding	Cluster0001
Pamr1:ENSMUSG00000027188	ENSMUSG00000027188	8	ensembl_havana	Pamr1	protein_coding	Cluster0001
Pappa:ENSMUSG00000028370	ENSMUSG00000028370	7	ensembl_havana	Pappa	protein_coding	Cluster0001
Parva:ENSMUSG00000030770	ENSMUSG00000030770	14	ensembl_havana	Parva	protein_coding	Cluster0001
Parvb:ENSMUSG00000022438	ENSMUSG00000022438	6	ensembl_havana	Parvb	protein_coding	Cluster0001
Pbx3:ENSMUSG00000038718	ENSMUSG00000038718	15	ensembl_havana	Pbx3	protein_coding	Cluster0001
Pcbp3:ENSMUSG00000001120	ENSMUSG00000001120	15	ensembl_havana	Pcbp3	protein_coding	Cluster0001
Pcdh10:ENSMUSG00000049100	ENSMUSG00000049100	15	ensembl_havana	Pcdh10	protein_coding	Cluster0001
Pcdh12:ENSMUSG00000024440	ENSMUSG00000024440	12	ensembl_havana	Pcdh12	protein_coding	Cluster0001
Pcdh17:ENSMUSG00000035566	ENSMUSG00000035566	6	ensembl	Pcdh17	protein_coding	Cluster0001
Pcdh18:ENSMUSG00000037892	ENSMUSG00000037892	13	ensembl_havana	Pcdh18	protein_coding	Cluster0001
Pcdh7:ENSMUSG00000029108	ENSMUSG00000029108	14	ensembl_havana	Pcdh7	protein_coding	Cluster0001
Pcdh9:ENSMUSG00000055421	ENSMUSG00000055421	8	ensembl_havana	Pcdh9	protein_coding	Cluster0001
Pcdhb17:ENSMUSG00000046387	ENSMUSG00000046387	5	ensembl_havana	Pcdhb17	protein_coding	Cluster0001
Pcdhb18:ENSMUSG00000048347	ENSMUSG00000048347	5	ensembl_havana	Pcdhb18	protein_coding	Cluster0001
Pcdhb9:ENSMUSG00000051242	ENSMUSG00000051242	1	ensembl_havana	Pcdhb9	protein_coding	Cluster0001
Pcdhga10:ENSMUSG00000102222	ENSMUSG00000102222	1	havana	Pcdhga10	protein_coding	Cluster0001
Pcdhga2:ENSMUSG00000103332	ENSMUSG00000103332	1	havana	Pcdhga2	protein_coding	Cluster0001
Pcdhga3:ENSMUSG00000104346	ENSMUSG00000104346	1	ensembl_havana	Pcdhga3	protein_coding	Cluster0001
Pcdhgb2:ENSMUSG00000102748	ENSMUSG00000102748	1	havana	Pcdhgb2	protein_coding	Cluster0001
Pcdhgc3:ENSMUSG00000102918	ENSMUSG00000102918	1	ensembl_havana	Pcdhgc3	protein_coding	Cluster0001
Pcnxl4:ENSMUSG00000034501	ENSMUSG00000034501	6	ensembl	Pcnxl4	protein_coding	Cluster0001
Pcolce:ENSMUSG00000029718	ENSMUSG00000029718	14	ensembl_havana	Pcolce	protein_coding	Cluster0001
Pcolce2:ENSMUSG00000015354	ENSMUSG00000015354	8	ensembl_havana	Pcolce2	protein_coding	Cluster0001
Pcsk1n:ENSMUSG00000039278	ENSMUSG00000039278	10	ensembl_havana	Pcsk1n	protein_coding	Cluster0001
Pcsk2:ENSMUSG00000027419	ENSMUSG00000027419	9	ensembl_havana	Pcsk2	protein_coding	Cluster0001
Pde1a:ENSMUSG00000059173	ENSMUSG00000059173	19	ensembl_havana	Pde1a	protein_coding	Cluster0001
Pde4c:ENSMUSG00000031842	ENSMUSG00000031842	13	ensembl_havana	Pde4c	protein_coding	Cluster0001
Pde7b:ENSMUSG00000019990	ENSMUSG00000019990	14	ensembl_havana	Pde7b	protein_coding	Cluster0001
Pdgfd:ENSMUSG00000032006	ENSMUSG00000032006	14	ensembl	Pdgfd	protein_coding	Cluster0001
Pdgfra:ENSMUSG00000029231	ENSMUSG00000029231	15	ensembl_havana	Pdgfra	protein_coding	Cluster0001
Pdgfrb:ENSMUSG00000024620	ENSMUSG00000024620	11	ensembl_havana	Pdgfrb	protein_coding	Cluster0001
Pdlim3:ENSMUSG00000031636	ENSMUSG00000031636	6	ensembl	Pdlim3	protein_coding	Cluster0001
Pdlim4:ENSMUSG00000020388	ENSMUSG00000020388	12	ensembl_havana	Pdlim4	protein_coding	Cluster0001
Pdlim7:ENSMUSG00000021493	ENSMUSG00000021493	15	ensembl_havana	Pdlim7	protein_coding	Cluster0001
Pdpn:ENSMUSG00000028583	ENSMUSG00000028583	14	ensembl_havana	Pdpn	protein_coding	Cluster0001
Pdzd4:ENSMUSG00000002006	ENSMUSG00000002006	12	ensembl_havana	Pdzd4	protein_coding	Cluster0001
Pdzrn3:ENSMUSG00000035357	ENSMUSG00000035357	16	ensembl_havana	Pdzrn3	protein_coding	Cluster0001
Pdzrn4:ENSMUSG00000036218	ENSMUSG00000036218	15	ensembl	Pdzrn4	protein_coding	Cluster0001
Peg10:ENSMUSG00000092035	ENSMUSG00000092035	8	ensembl_havana	Peg10	protein_coding	Cluster0001
Peg3:ENSMUSG00000002265	ENSMUSG00000002265	16	ensembl_havana	Peg3	protein_coding	Cluster0001
Peli2:ENSMUSG00000021846	ENSMUSG00000021846	8	ensembl	Peli2	protein_coding	Cluster0001
Peli3:ENSMUSG00000024901	ENSMUSG00000024901	14	ensembl_havana	Peli3	protein_coding	Cluster0001
Penk:ENSMUSG00000045573	ENSMUSG00000045573	9	ensembl_havana	Penk	protein_coding	Cluster0001
Pfkm:ENSMUSG00000033065	ENSMUSG00000033065	13	ensembl	Pfkm	protein_coding	Cluster0001
Pgbd5:ENSMUSG00000050751	ENSMUSG00000050751	14	ensembl_havana	Pgbd5	protein_coding	Cluster0001
Pgm5:ENSMUSG00000041731	ENSMUSG00000041731	13	ensembl_havana	Pgm5	protein_coding	Cluster0001
Phactr1:ENSMUSG00000054728	ENSMUSG00000054728	16	ensembl_havana	Phactr1	protein_coding	Cluster0001
Phactr2:ENSMUSG00000062866	ENSMUSG00000062866	15	ensembl_havana	Phactr2	protein_coding	Cluster0001
Phf24:ENSMUSG00000036062	ENSMUSG00000036062	13	ensembl_havana	Phf24	protein_coding	Cluster0001
Phldb2:ENSMUSG00000033149	ENSMUSG00000033149	16	ensembl_havana	Phldb2	protein_coding	Cluster0001
Phox2a:ENSMUSG00000007946	ENSMUSG00000007946	10	ensembl_havana	Phox2a	protein_coding	Cluster0001
Phox2b:ENSMUSG00000012520	ENSMUSG00000012520	10	ensembl_havana	Phox2b	protein_coding	Cluster0001
Pi16:ENSMUSG00000024011	ENSMUSG00000024011	16	ensembl_havana	Pi16	protein_coding	Cluster0001
Pid1:ENSMUSG00000045658	ENSMUSG00000045658	16	ensembl_havana	Pid1	protein_coding	Cluster0001
Piezo2:ENSMUSG00000041482	ENSMUSG00000041482	16	ensembl_havana	Piezo2	protein_coding	Cluster0001
Pik3ip1:ENSMUSG00000034614	ENSMUSG00000034614	14	ensembl_havana	Pik3ip1	protein_coding	Cluster0001
Pirt:ENSMUSG00000048070	ENSMUSG00000048070	4	ensembl_havana	Pirt	protein_coding	Cluster0001
Pitpnm3:ENSMUSG00000040543	ENSMUSG00000040543	16	ensembl_havana	Pitpnm3	protein_coding	Cluster0001
Pkd2:ENSMUSG00000034462	ENSMUSG00000034462	9	ensembl_havana	Pkd2	protein_coding	Cluster0001
Pkia:ENSMUSG00000027499	ENSMUSG00000027499	12	ensembl_havana	Pkia	protein_coding	Cluster0001
Pknox2:ENSMUSG00000035934	ENSMUSG00000035934	15	ensembl_havana	Pknox2	protein_coding	Cluster0001
Pla1a:ENSMUSG00000002847	ENSMUSG00000002847	6	ensembl	Pla1a	protein_coding	Cluster0001
Pla2r1:ENSMUSG00000054580	ENSMUSG00000054580	14	ensembl_havana	Pla2r1	protein_coding	Cluster0001
Plagl1:ENSMUSG00000019817	ENSMUSG00000019817	18	ensembl_havana	Plagl1	protein_coding	Cluster0001
Plau:ENSMUSG00000021822	ENSMUSG00000021822	2	ensembl	Plau	protein_coding	Cluster0001
Plcb1:ENSMUSG00000051177	ENSMUSG00000051177	16	ensembl_havana	Plcb1	protein_coding	Cluster0001
Plcb4:ENSMUSG00000039943	ENSMUSG00000039943	16	ensembl_havana	Plcb4	protein_coding	Cluster0001
Plcl1:ENSMUSG00000038349	ENSMUSG00000038349	10	ensembl_havana	Plcl1	protein_coding	Cluster0001
Plekha4:ENSMUSG00000040428	ENSMUSG00000040428	18	ensembl	Plekha4	protein_coding	Cluster0001
Plekhb1:ENSMUSG00000030701	ENSMUSG00000030701	17	ensembl_havana	Plekhb1	protein_coding	Cluster0001
Plekhh2:ENSMUSG00000040852	ENSMUSG00000040852	5	ensembl	Plekhh2	protein_coding	Cluster0001
Plin4:ENSMUSG00000002831	ENSMUSG00000002831	13	ensembl_havana	Plin4	protein_coding	Cluster0001
Pln:ENSMUSG00000038583	ENSMUSG00000038583	12	ensembl	Pln	protein_coding	Cluster0001
Plod2:ENSMUSG00000032374	ENSMUSG00000032374	14	ensembl_havana	Plod2	protein_coding	Cluster0001
Plp1:ENSMUSG00000031425	ENSMUSG00000031425	15	ensembl_havana	Plp1	protein_coding	Cluster0001
Plpp3:ENSMUSG00000028517	ENSMUSG00000028517	8	ensembl_havana	Plpp3	protein_coding	Cluster0001
Plppr3:ENSMUSG00000035835	ENSMUSG00000035835	14	ensembl_havana	Plppr3	protein_coding	Cluster0001
Pls3:ENSMUSG00000016382	ENSMUSG00000016382	15	ensembl_havana	Pls3	protein_coding	Cluster0001
Plvap:ENSMUSG00000034845	ENSMUSG00000034845	5	ensembl	Plvap	protein_coding	Cluster0001
Plxdc2:ENSMUSG00000026748	ENSMUSG00000026748	13	ensembl_havana	Plxdc2	protein_coding	Cluster0001
Plxna4:ENSMUSG00000029765	ENSMUSG00000029765	12	ensembl_havana	Plxna4	protein_coding	Cluster0001
Plxnb3:ENSMUSG00000031385	ENSMUSG00000031385	14	ensembl_havana	Plxnb3	protein_coding	Cluster0001
Pnck:ENSMUSG00000002012	ENSMUSG00000002012	13	ensembl_havana	Pnck	protein_coding	Cluster0001
Pnmal1:ENSMUSG00000041141	ENSMUSG00000041141	7	ensembl_havana	Pnmal1	protein_coding	Cluster0001
Pnmal2:ENSMUSG00000070802	ENSMUSG00000070802	5	ensembl_havana	Pnmal2	protein_coding	Cluster0001
Podxl:ENSMUSG00000025608	ENSMUSG00000025608	9	ensembl_havana	Podxl	protein_coding	Cluster0001
Podxl2:ENSMUSG00000033152	ENSMUSG00000033152	13	ensembl_havana	Podxl2	protein_coding	Cluster0001
Popdc2:ENSMUSG00000022803	ENSMUSG00000022803	12	ensembl_havana	Popdc2	protein_coding	Cluster0001
Postn:ENSMUSG00000027750	ENSMUSG00000027750	16	ensembl_havana	Postn	protein_coding	Cluster0001
Ppm1e:ENSMUSG00000046442	ENSMUSG00000046442	4	ensembl_havana	Ppm1e	protein_coding	Cluster0001
Ppm1l:ENSMUSG00000027784	ENSMUSG00000027784	10	ensembl_havana	Ppm1l	protein_coding	Cluster0001
Ppp1r12b:ENSMUSG00000073557	ENSMUSG00000073557	11	ensembl_havana	Ppp1r12b	protein_coding	Cluster0001
Ppp1r12c:ENSMUSG00000019254	ENSMUSG00000019254	16	ensembl_havana	Ppp1r12c	protein_coding	Cluster0001
Ppp1r3c:ENSMUSG00000067279	ENSMUSG00000067279	2	ensembl	Ppp1r3c	protein_coding	Cluster0001
Ppp1r9a:ENSMUSG00000032827	ENSMUSG00000032827	15	ensembl_havana	Ppp1r9a	protein_coding	Cluster0001
Ppp2r2b:ENSMUSG00000024500	ENSMUSG00000024500	18	ensembl_havana	Ppp2r2b	protein_coding	Cluster0001
Ppp2r2c:ENSMUSG00000029120	ENSMUSG00000029120	10	ensembl_havana	Ppp2r2c	protein_coding	Cluster0001
Pqlc1:ENSMUSG00000034006	ENSMUSG00000034006	16	ensembl_havana	Pqlc1	protein_coding	Cluster0001
Prdm6:ENSMUSG00000069378	ENSMUSG00000069378	13	ensembl_havana	Prdm6	protein_coding	Cluster0001
Prelp:ENSMUSG00000041577	ENSMUSG00000041577	5	ensembl_havana	Prelp	protein_coding	Cluster0001
Prex2:ENSMUSG00000048960	ENSMUSG00000048960	13	ensembl_havana	Prex2	protein_coding	Cluster0001
Prickle1:ENSMUSG00000036158	ENSMUSG00000036158	12	ensembl_havana	Prickle1	protein_coding	Cluster0001
Prkab2:ENSMUSG00000038205	ENSMUSG00000038205	12	ensembl_havana	Prkab2	protein_coding	Cluster0001
Prkar1b:ENSMUSG00000025855	ENSMUSG00000025855	13	ensembl_havana	Prkar1b	protein_coding	Cluster0001
Prkar2b:ENSMUSG00000002997	ENSMUSG00000002997	15	ensembl_havana	Prkar2b	protein_coding	Cluster0001
Prkcdbp:ENSMUSG00000037060	ENSMUSG00000037060	2	ensembl	Prkcdbp	protein_coding	Cluster0001
Prkd1:ENSMUSG00000002688	ENSMUSG00000002688	7	ensembl	Prkd1	protein_coding	Cluster0001
Prkg1:ENSMUSG00000052920	ENSMUSG00000052920	14	ensembl_havana	Prkg1	protein_coding	Cluster0001
Pros1:ENSMUSG00000022912	ENSMUSG00000022912	8	ensembl_havana	Pros1	protein_coding	Cluster0001
Prph:ENSMUSG00000023484	ENSMUSG00000023484	13	ensembl	Prph	protein_coding	Cluster0001
Prr16:ENSMUSG00000073565	ENSMUSG00000073565	4	ensembl	Prr16	protein_coding	Cluster0001
Prrg3:ENSMUSG00000033361	ENSMUSG00000033361	13	ensembl_havana	Prrg3	protein_coding	Cluster0001
Prune2:ENSMUSG00000039126	ENSMUSG00000039126	9	ensembl	Prune2	protein_coding	Cluster0001
Psd:ENSMUSG00000037126	ENSMUSG00000037126	15	ensembl	Psd	protein_coding	Cluster0001
Psd3:ENSMUSG00000030465	ENSMUSG00000030465	18	ensembl_havana	Psd3	protein_coding	Cluster0001
Ptbp2:ENSMUSG00000028134	ENSMUSG00000028134	11	ensembl_havana	Ptbp2	protein_coding	Cluster0001
Ptger1:ENSMUSG00000019464	ENSMUSG00000019464	5	ensembl_havana	Ptger1	protein_coding	Cluster0001
Ptger3:ENSMUSG00000040016	ENSMUSG00000040016	16	ensembl_havana	Ptger3	protein_coding	Cluster0001
Ptges:ENSMUSG00000050737	ENSMUSG00000050737	13	ensembl_havana	Ptges	protein_coding	Cluster0001
Ptgfr:ENSMUSG00000028036	ENSMUSG00000028036	6	ensembl_havana	Ptgfr	protein_coding	Cluster0001
Ptgir:ENSMUSG00000043017	ENSMUSG00000043017	9	ensembl_havana	Ptgir	protein_coding	Cluster0001
Ptgis:ENSMUSG00000017969	ENSMUSG00000017969	13	ensembl_havana	Ptgis	protein_coding	Cluster0001
Ptgs2:ENSMUSG00000032487	ENSMUSG00000032487	8	ensembl_havana	Ptgs2	protein_coding	Cluster0001
Pth1r:ENSMUSG00000032492	ENSMUSG00000032492	14	ensembl_havana	Pth1r	protein_coding	Cluster0001
Ptk7:ENSMUSG00000023972	ENSMUSG00000023972	9	ensembl	Ptk7	protein_coding	Cluster0001
Ptn:ENSMUSG00000029838	ENSMUSG00000029838	11	ensembl_havana	Ptn	protein_coding	Cluster0001
Ptpdc1:ENSMUSG00000038042	ENSMUSG00000038042	9	ensembl	Ptpdc1	protein_coding	Cluster0001
Ptpn14:ENSMUSG00000026604	ENSMUSG00000026604	17	ensembl_havana	Ptpn14	protein_coding	Cluster0001
Ptprb:ENSMUSG00000020154	ENSMUSG00000020154	9	ensembl	Ptprb	protein_coding	Cluster0001
Ptprm:ENSMUSG00000033278	ENSMUSG00000033278	9	ensembl	Ptprm	protein_coding	Cluster0001
Ptprn:ENSMUSG00000026204	ENSMUSG00000026204	15	ensembl_havana	Ptprn	protein_coding	Cluster0001
Ptprs:ENSMUSG00000013236	ENSMUSG00000013236	16	ensembl_havana	Ptprs	protein_coding	Cluster0001
Ptpru:ENSMUSG00000028909	ENSMUSG00000028909	17	ensembl_havana	Ptpru	protein_coding	Cluster0001
Ptrf:ENSMUSG00000004044	ENSMUSG00000004044	9	ensembl_havana	Ptrf	protein_coding	Cluster0001
Pxdn:ENSMUSG00000020674	ENSMUSG00000020674	16	ensembl_havana	Pxdn	protein_coding	Cluster0001
Pygm:ENSMUSG00000032648	ENSMUSG00000032648	14	ensembl_havana	Pygm	protein_coding	Cluster0001
Pygo1:ENSMUSG00000034910	ENSMUSG00000034910	5	ensembl_havana	Pygo1	protein_coding	Cluster0001
Rab11fip5:ENSMUSG00000051343	ENSMUSG00000051343	11	ensembl_havana	Rab11fip5	protein_coding	Cluster0001
Rab12:ENSMUSG00000023460	ENSMUSG00000023460	12	ensembl_havana	Rab12	protein_coding	Cluster0001
Rab23:ENSMUSG00000004768	ENSMUSG00000004768	14	ensembl_havana	Rab23	protein_coding	Cluster0001
Rab34:ENSMUSG00000002059	ENSMUSG00000002059	18	ensembl_havana	Rab34	protein_coding	Cluster0001
Rab36:ENSMUSG00000020175	ENSMUSG00000020175	13	ensembl_havana	Rab36	protein_coding	Cluster0001
Rab3b:ENSMUSG00000003411	ENSMUSG00000003411	10	ensembl_havana	Rab3b	protein_coding	Cluster0001
Rab3c:ENSMUSG00000021700	ENSMUSG00000021700	9	ensembl	Rab3c	protein_coding	Cluster0001
Rab3il1:ENSMUSG00000024663	ENSMUSG00000024663	17	ensembl_havana	Rab3il1	protein_coding	Cluster0001
Rab40b:ENSMUSG00000025170	ENSMUSG00000025170	13	ensembl_havana	Rab40b	protein_coding	Cluster0001
Rab6b:ENSMUSG00000032549	ENSMUSG00000032549	7	ensembl_havana	Rab6b	protein_coding	Cluster0001
Rab7b:ENSMUSG00000052688	ENSMUSG00000052688	12	ensembl_havana	Rab7b	protein_coding	Cluster0001
Rai2:ENSMUSG00000043518	ENSMUSG00000043518	7	ensembl_havana	Rai2	protein_coding	Cluster0001
Ralyl:ENSMUSG00000039717	ENSMUSG00000039717	15	ensembl_havana	Ralyl	protein_coding	Cluster0001
Ramp2:ENSMUSG00000001240	ENSMUSG00000001240	13	ensembl_havana	Ramp2	protein_coding	Cluster0001
Rarg:ENSMUSG00000001288	ENSMUSG00000001288	14	ensembl_havana	Rarg	protein_coding	Cluster0001
Rarres1:ENSMUSG00000049404	ENSMUSG00000049404	7	ensembl_havana	Rarres1	protein_coding	Cluster0001
Rasgef1c:ENSMUSG00000020374	ENSMUSG00000020374	16	ensembl_havana	Rasgef1c	protein_coding	Cluster0001
Rasip1:ENSMUSG00000044562	ENSMUSG00000044562	11	ensembl	Rasip1	protein_coding	Cluster0001
Rasl10b:ENSMUSG00000020684	ENSMUSG00000020684	14	ensembl_havana	Rasl10b	protein_coding	Cluster0001
Rasl11a:ENSMUSG00000029641	ENSMUSG00000029641	8	ensembl_havana	Rasl11a	protein_coding	Cluster0001
Rassf3:ENSMUSG00000025795	ENSMUSG00000025795	7	ensembl	Rassf3	protein_coding	Cluster0001
Rassf8:ENSMUSG00000030259	ENSMUSG00000030259	12	ensembl_havana	Rassf8	protein_coding	Cluster0001
Rassf9:ENSMUSG00000044921	ENSMUSG00000044921	4	ensembl_havana	Rassf9	protein_coding	Cluster0001
Raver2:ENSMUSG00000035275	ENSMUSG00000035275	14	ensembl_havana	Raver2	protein_coding	Cluster0001
Rbfox1:ENSMUSG00000008658	ENSMUSG00000008658	15	ensembl	Rbfox1	protein_coding	Cluster0001
Rbfox2:ENSMUSG00000033565	ENSMUSG00000033565	16	ensembl	Rbfox2	protein_coding	Cluster0001
Rbm24:ENSMUSG00000038132	ENSMUSG00000038132	5	ensembl	Rbm24	protein_coding	Cluster0001
Rbms3:ENSMUSG00000039607	ENSMUSG00000039607	15	ensembl_havana	Rbms3	protein_coding	Cluster0001
Rbpms:ENSMUSG00000031586	ENSMUSG00000031586	16	ensembl_havana	Rbpms	protein_coding	Cluster0001
Rbpms2:ENSMUSG00000032387	ENSMUSG00000032387	14	ensembl	Rbpms2	protein_coding	Cluster0001
Rcan2:ENSMUSG00000039601	ENSMUSG00000039601	15	ensembl	Rcan2	protein_coding	Cluster0001
Rcn3:ENSMUSG00000019539	ENSMUSG00000019539	10	ensembl	Rcn3	protein_coding	Cluster0001
Reck:ENSMUSG00000028476	ENSMUSG00000028476	13	ensembl_havana	Reck	protein_coding	Cluster0001
Reep2:ENSMUSG00000038555	ENSMUSG00000038555	7	ensembl	Reep2	protein_coding	Cluster0001
Rem1:ENSMUSG00000000359	ENSMUSG00000000359	3	ensembl_havana	Rem1	protein_coding	Cluster0001
Rerg:ENSMUSG00000030222	ENSMUSG00000030222	13	ensembl_havana	Rerg	protein_coding	Cluster0001
Resp18:ENSMUSG00000033061	ENSMUSG00000033061	15	ensembl_havana	Resp18	protein_coding	Cluster0001
Rgma:ENSMUSG00000070509	ENSMUSG00000070509	15	ensembl_havana	Rgma	protein_coding	Cluster0001
Rgmb:ENSMUSG00000048027	ENSMUSG00000048027	7	ensembl	Rgmb	protein_coding	Cluster0001
Rgs4:ENSMUSG00000038530	ENSMUSG00000038530	11	ensembl_havana	Rgs4	protein_coding	Cluster0001
Rgs5:ENSMUSG00000026678	ENSMUSG00000026678	10	ensembl_havana	Rgs5	protein_coding	Cluster0001
Rgs6:ENSMUSG00000021219	ENSMUSG00000021219	16	ensembl_havana	Rgs6	protein_coding	Cluster0001
Rgs7bp:ENSMUSG00000021719	ENSMUSG00000021719	8	ensembl	Rgs7bp	protein_coding	Cluster0001
Rhoj:ENSMUSG00000046768	ENSMUSG00000046768	13	ensembl_havana	Rhoj	protein_coding	Cluster0001
Ric3:ENSMUSG00000048330	ENSMUSG00000048330	14	ensembl_havana	Ric3	protein_coding	Cluster0001
Rilpl1:ENSMUSG00000029392	ENSMUSG00000029392	12	ensembl_havana	Rilpl1	protein_coding	Cluster0001
Rims1:ENSMUSG00000041670	ENSMUSG00000041670	15	ensembl_havana	Rims1	protein_coding	Cluster0001
Rims3:ENSMUSG00000032890	ENSMUSG00000032890	17	ensembl_havana	Rims3	protein_coding	Cluster0001
Rit2:ENSMUSG00000057455	ENSMUSG00000057455	12	ensembl_havana	Rit2	protein_coding	Cluster0001
Rnf150:ENSMUSG00000047747	ENSMUSG00000047747	9	ensembl	Rnf150	protein_coding	Cluster0001
Rnf207:ENSMUSG00000058498	ENSMUSG00000058498	12	ensembl_havana	Rnf207	protein_coding	Cluster0001
Rnf217:ENSMUSG00000063760	ENSMUSG00000063760	9	ensembl_havana	Rnf217	protein_coding	Cluster0001
Robo1:ENSMUSG00000022883	ENSMUSG00000022883	10	ensembl_havana	Robo1	protein_coding	Cluster0001
Robo2:ENSMUSG00000052516	ENSMUSG00000052516	17	ensembl_havana	Robo2	protein_coding	Cluster0001
Robo4:ENSMUSG00000032125	ENSMUSG00000032125	19	ensembl_havana	Robo4	protein_coding	Cluster0001
Ror1:ENSMUSG00000035305	ENSMUSG00000035305	5	ensembl_havana	Ror1	protein_coding	Cluster0001
Ror2:ENSMUSG00000021464	ENSMUSG00000021464	14	ensembl_havana	Ror2	protein_coding	Cluster0001
Rora:ENSMUSG00000032238	ENSMUSG00000032238	17	ensembl_havana	Rora	protein_coding	Cluster0001
RP23-8I8.4:ENSMUSG00000108601	ENSMUSG00000108601	1	havana	RP23-8I8.4	TEC	Cluster0001
Rph3a:ENSMUSG00000029608	ENSMUSG00000029608	10	ensembl_havana	Rph3a	protein_coding	Cluster0001
Rragb:ENSMUSG00000041658	ENSMUSG00000041658	12	ensembl_havana	Rragb	protein_coding	Cluster0001
Rspo2:ENSMUSG00000051920	ENSMUSG00000051920	6	ensembl	Rspo2	protein_coding	Cluster0001
Rspo3:ENSMUSG00000019880	ENSMUSG00000019880	9	ensembl	Rspo3	protein_coding	Cluster0001
Rtn1:ENSMUSG00000021087	ENSMUSG00000021087	17	ensembl_havana	Rtn1	protein_coding	Cluster0001
Rtn2:ENSMUSG00000030401	ENSMUSG00000030401	16	ensembl_havana	Rtn2	protein_coding	Cluster0001
Rtn4rl2:ENSMUSG00000050896	ENSMUSG00000050896	12	ensembl_havana	Rtn4rl2	protein_coding	Cluster0001
Runx1t1:ENSMUSG00000006586	ENSMUSG00000006586	15	ensembl_havana	Runx1t1	protein_coding	Cluster0001
Rusc2:ENSMUSG00000035969	ENSMUSG00000035969	15	ensembl_havana	Rusc2	protein_coding	Cluster0001
Ryr2:ENSMUSG00000021313	ENSMUSG00000021313	15	ensembl	Ryr2	protein_coding	Cluster0001
S100b:ENSMUSG00000033208	ENSMUSG00000033208	7	ensembl_havana	S100b	protein_coding	Cluster0001
Sall1:ENSMUSG00000031665	ENSMUSG00000031665	6	ensembl	Sall1	protein_coding	Cluster0001
Samd4:ENSMUSG00000021838	ENSMUSG00000021838	16	ensembl_havana	Samd4	protein_coding	Cluster0001
Sbspon:ENSMUSG00000032719	ENSMUSG00000032719	4	ensembl_havana	Sbspon	protein_coding	Cluster0001
Scara3:ENSMUSG00000034463	ENSMUSG00000034463	3	ensembl	Scara3	protein_coding	Cluster0001
Scarf2:ENSMUSG00000012017	ENSMUSG00000012017	3	ensembl	Scarf2	protein_coding	Cluster0001
Scg2:ENSMUSG00000050711	ENSMUSG00000050711	7	ensembl_havana	Scg2	protein_coding	Cluster0001
Scg3:ENSMUSG00000032181	ENSMUSG00000032181	6	ensembl	Scg3	protein_coding	Cluster0001
Scn11a:ENSMUSG00000034115	ENSMUSG00000034115	9	ensembl	Scn11a	protein_coding	Cluster0001
Scn1b:ENSMUSG00000019194	ENSMUSG00000019194	14	ensembl	Scn1b	protein_coding	Cluster0001
Scn5a:ENSMUSG00000032511	ENSMUSG00000032511	17	ensembl_havana	Scn5a	protein_coding	Cluster0001
Scn7a:ENSMUSG00000034810	ENSMUSG00000034810	7	ensembl_havana	Scn7a	protein_coding	Cluster0001
Scrn1:ENSMUSG00000019124	ENSMUSG00000019124	10	ensembl_havana	Scrn1	protein_coding	Cluster0001
Scube1:ENSMUSG00000016763	ENSMUSG00000016763	14	ensembl_havana	Scube1	protein_coding	Cluster0001
Scube2:ENSMUSG00000007279	ENSMUSG00000007279	14	ensembl_havana	Scube2	protein_coding	Cluster0001
Sdc2:ENSMUSG00000022261	ENSMUSG00000022261	5	ensembl_havana	Sdc2	protein_coding	Cluster0001
Sdc3:ENSMUSG00000025743	ENSMUSG00000025743	14	ensembl_havana	Sdc3	protein_coding	Cluster0001
Sdk1:ENSMUSG00000039683	ENSMUSG00000039683	16	ensembl_havana	Sdk1	protein_coding	Cluster0001
Sdk2:ENSMUSG00000041592	ENSMUSG00000041592	16	ensembl_havana	Sdk2	protein_coding	Cluster0001
Sdpr:ENSMUSG00000045954	ENSMUSG00000045954	7	ensembl_havana	Sdpr	protein_coding	Cluster0001
Selp:ENSMUSG00000026580	ENSMUSG00000026580	16	ensembl_havana	Selp	protein_coding	Cluster0001
Sema3a:ENSMUSG00000028883	ENSMUSG00000028883	17	ensembl_havana	Sema3a	protein_coding	Cluster0001
Sema3f:ENSMUSG00000034684	ENSMUSG00000034684	12	ensembl_havana	Sema3f	protein_coding	Cluster0001
Sema3g:ENSMUSG00000021904	ENSMUSG00000021904	5	ensembl_havana	Sema3g	protein_coding	Cluster0001
Serpina3n:ENSMUSG00000021091	ENSMUSG00000021091	8	ensembl_havana	Serpina3n	protein_coding	Cluster0001
Serpinb8:ENSMUSG00000026315	ENSMUSG00000026315	13	ensembl_havana	Serpinb8	protein_coding	Cluster0001
Serpine2:ENSMUSG00000026249	ENSMUSG00000026249	10	ensembl_havana	Serpine2	protein_coding	Cluster0001
Serping1:ENSMUSG00000023224	ENSMUSG00000023224	12	ensembl_havana	Serping1	protein_coding	Cluster0001
Serpinh1:ENSMUSG00000070436	ENSMUSG00000070436	12	ensembl_havana	Serpinh1	protein_coding	Cluster0001
Sez6:ENSMUSG00000000632	ENSMUSG00000000632	13	ensembl_havana	Sez6	protein_coding	Cluster0001
Sez6l:ENSMUSG00000058153	ENSMUSG00000058153	14	ensembl_havana	Sez6l	protein_coding	Cluster0001
Sfrp1:ENSMUSG00000031548	ENSMUSG00000031548	7	ensembl_havana	Sfrp1	protein_coding	Cluster0001
Sgca:ENSMUSG00000001508	ENSMUSG00000001508	15	ensembl_havana	Sgca	protein_coding	Cluster0001
Sgcb:ENSMUSG00000029156	ENSMUSG00000029156	11	ensembl_havana	Sgcb	protein_coding	Cluster0001
Sgcd:ENSMUSG00000020354	ENSMUSG00000020354	15	ensembl_havana	Sgcd	protein_coding	Cluster0001
Sgce:ENSMUSG00000004631	ENSMUSG00000004631	15	ensembl_havana	Sgce	protein_coding	Cluster0001
Sgip1:ENSMUSG00000028524	ENSMUSG00000028524	21	ensembl_havana	Sgip1	protein_coding	Cluster0001
Sgtb:ENSMUSG00000042743	ENSMUSG00000042743	13	ensembl_havana	Sgtb	protein_coding	Cluster0001
Sh3bgr:ENSMUSG00000040666	ENSMUSG00000040666	17	ensembl_havana	Sh3bgr	protein_coding	Cluster0001
Shank3:ENSMUSG00000022623	ENSMUSG00000022623	15	ensembl_havana	Shank3	protein_coding	Cluster0001
Shc2:ENSMUSG00000020312	ENSMUSG00000020312	11	ensembl_havana	Shc2	protein_coding	Cluster0001
Shc4:ENSMUSG00000035109	ENSMUSG00000035109	14	ensembl_havana	Shc4	protein_coding	Cluster0001
Shd:ENSMUSG00000039154	ENSMUSG00000039154	6	ensembl	Shd	protein_coding	Cluster0001
She:ENSMUSG00000046280	ENSMUSG00000046280	9	ensembl_havana	She	protein_coding	Cluster0001
Shisa6:ENSMUSG00000053930	ENSMUSG00000053930	13	ensembl_havana	Shisa6	protein_coding	Cluster0001
Shroom4:ENSMUSG00000068270	ENSMUSG00000068270	15	ensembl_havana	Shroom4	protein_coding	Cluster0001
Siglec1:ENSMUSG00000027322	ENSMUSG00000027322	11	ensembl_havana	Siglec1	protein_coding	Cluster0001
Six5:ENSMUSG00000040841	ENSMUSG00000040841	5	ensembl_havana	Six5	protein_coding	Cluster0001
Slc10a4:ENSMUSG00000029219	ENSMUSG00000029219	10	ensembl_havana	Slc10a4	protein_coding	Cluster0001
Slc10a6:ENSMUSG00000029321	ENSMUSG00000029321	1	ensembl_havana	Slc10a6	protein_coding	Cluster0001
Slc16a2:ENSMUSG00000033965	ENSMUSG00000033965	10	ensembl_havana	Slc16a2	protein_coding	Cluster0001
Slc16a7:ENSMUSG00000020102	ENSMUSG00000020102	14	ensembl	Slc16a7	protein_coding	Cluster0001
Slc18a2:ENSMUSG00000025094	ENSMUSG00000025094	7	ensembl	Slc18a2	protein_coding	Cluster0001
Slc18a3:ENSMUSG00000100241	ENSMUSG00000100241	1	havana	Slc18a3	protein_coding	Cluster0001
Slc22a17:ENSMUSG00000022199	ENSMUSG00000022199	10	ensembl	Slc22a17	protein_coding	Cluster0001
Slc24a3:ENSMUSG00000063873	ENSMUSG00000063873	10	ensembl_havana	Slc24a3	protein_coding	Cluster0001
Slc25a23:ENSMUSG00000046329	ENSMUSG00000046329	14	ensembl_havana	Slc25a23	protein_coding	Cluster0001
Slc25a4:ENSMUSG00000031633	ENSMUSG00000031633	4	ensembl_havana	Slc25a4	protein_coding	Cluster0001
Slc27a6:ENSMUSG00000024600	ENSMUSG00000024600	8	ensembl_havana	Slc27a6	protein_coding	Cluster0001
Slc29a1:ENSMUSG00000023942	ENSMUSG00000023942	15	ensembl_havana	Slc29a1	protein_coding	Cluster0001
Slc2a12:ENSMUSG00000037490	ENSMUSG00000037490	5	ensembl_havana	Slc2a12	protein_coding	Cluster0001
Slc2a13:ENSMUSG00000036298	ENSMUSG00000036298	10	ensembl_havana	Slc2a13	protein_coding	Cluster0001
Slc2a4:ENSMUSG00000018566	ENSMUSG00000018566	14	ensembl_havana	Slc2a4	protein_coding	Cluster0001
Slc35d3:ENSMUSG00000050473	ENSMUSG00000050473	4	ensembl	Slc35d3	protein_coding	Cluster0001
Slc35e4:ENSMUSG00000048807	ENSMUSG00000048807	2	ensembl_havana	Slc35e4	protein_coding	Cluster0001
Slc35f1:ENSMUSG00000038602	ENSMUSG00000038602	7	ensembl_havana	Slc35f1	protein_coding	Cluster0001
Slc36a4:ENSMUSG00000043885	ENSMUSG00000043885	13	ensembl_havana	Slc36a4	protein_coding	Cluster0001
Slc43a3:ENSMUSG00000027074	ENSMUSG00000027074	14	ensembl_havana	Slc43a3	protein_coding	Cluster0001
Slc45a1:ENSMUSG00000039838	ENSMUSG00000039838	11	ensembl_havana	Slc45a1	protein_coding	Cluster0001
Slc4a3:ENSMUSG00000006576	ENSMUSG00000006576	16	ensembl_havana	Slc4a3	protein_coding	Cluster0001
Slc5a7:ENSMUSG00000023945	ENSMUSG00000023945	6	ensembl	Slc5a7	protein_coding	Cluster0001
Slc6a15:ENSMUSG00000019894	ENSMUSG00000019894	13	ensembl	Slc6a15	protein_coding	Cluster0001
Slc6a17:ENSMUSG00000027894	ENSMUSG00000027894	14	ensembl_havana	Slc6a17	protein_coding	Cluster0001
Slc7a14:ENSMUSG00000069072	ENSMUSG00000069072	9	ensembl_havana	Slc7a14	protein_coding	Cluster0001
Slc8a1:ENSMUSG00000054640	ENSMUSG00000054640	14	ensembl	Slc8a1	protein_coding	Cluster0001
Slc8a2:ENSMUSG00000030376	ENSMUSG00000030376	7	ensembl	Slc8a2	protein_coding	Cluster0001
Slc9a3r2:ENSMUSG00000002504	ENSMUSG00000002504	14	ensembl	Slc9a3r2	protein_coding	Cluster0001
Slit2:ENSMUSG00000031558	ENSMUSG00000031558	15	ensembl_havana	Slit2	protein_coding	Cluster0001
Slit3:ENSMUSG00000056427	ENSMUSG00000056427	10	ensembl_havana	Slit3	protein_coding	Cluster0001
Slitrk3:ENSMUSG00000048304	ENSMUSG00000048304	8	ensembl_havana	Slitrk3	protein_coding	Cluster0001
Slitrk5:ENSMUSG00000033214	ENSMUSG00000033214	9	ensembl	Slitrk5	protein_coding	Cluster0001
Smad9:ENSMUSG00000027796	ENSMUSG00000027796	2	ensembl_havana	Smad9	protein_coding	Cluster0001
Smim1:ENSMUSG00000078350	ENSMUSG00000078350	11	ensembl_havana	Smim1	protein_coding	Cluster0001
Smo:ENSMUSG00000001761	ENSMUSG00000001761	7	ensembl_havana	Smo	protein_coding	Cluster0001
Smtn:ENSMUSG00000020439	ENSMUSG00000020439	17	ensembl_havana	Smtn	protein_coding	Cluster0001
Snai1:ENSMUSG00000042821	ENSMUSG00000042821	7	ensembl_havana	Snai1	protein_coding	Cluster0001
Snai2:ENSMUSG00000022676	ENSMUSG00000022676	6	ensembl	Snai2	protein_coding	Cluster0001
Snap25:ENSMUSG00000027273	ENSMUSG00000027273	13	ensembl_havana	Snap25	protein_coding	Cluster0001
Snap91:ENSMUSG00000033419	ENSMUSG00000033419	15	ensembl_havana	Snap91	protein_coding	Cluster0001
Snca:ENSMUSG00000025889	ENSMUSG00000025889	13	ensembl_havana	Snca	protein_coding	Cluster0001
Sncaip:ENSMUSG00000024534	ENSMUSG00000024534	15	ensembl_havana	Sncaip	protein_coding	Cluster0001
Sncb:ENSMUSG00000034891	ENSMUSG00000034891	13	ensembl_havana	Sncb	protein_coding	Cluster0001
Sntb1:ENSMUSG00000060429	ENSMUSG00000060429	11	ensembl_havana	Sntb1	protein_coding	Cluster0001
Sntg2:ENSMUSG00000020672	ENSMUSG00000020672	13	ensembl_havana	Sntg2	protein_coding	Cluster0001
Snx32:ENSMUSG00000056185	ENSMUSG00000056185	4	ensembl	Snx32	protein_coding	Cluster0001
Sobp:ENSMUSG00000038248	ENSMUSG00000038248	8	ensembl_havana	Sobp	protein_coding	Cluster0001
Sod3:ENSMUSG00000072941	ENSMUSG00000072941	5	ensembl_havana	Sod3	protein_coding	Cluster0001
Soga3:ENSMUSG00000038916	ENSMUSG00000038916	6	ensembl	Soga3	protein_coding	Cluster0001
Sorbs2:ENSMUSG00000031626	ENSMUSG00000031626	16	ensembl_havana	Sorbs2	protein_coding	Cluster0001
Sorbs3:ENSMUSG00000022091	ENSMUSG00000022091	5	ensembl	Sorbs3	protein_coding	Cluster0001
Sorcs1:ENSMUSG00000043531	ENSMUSG00000043531	15	ensembl	Sorcs1	protein_coding	Cluster0001
Sox10:ENSMUSG00000033006	ENSMUSG00000033006	9	ensembl	Sox10	protein_coding	Cluster0001
Sox12:ENSMUSG00000051817	ENSMUSG00000051817	8	ensembl_havana	Sox12	protein_coding	Cluster0001
Sox17:ENSMUSG00000025902	ENSMUSG00000025902	13	ensembl_havana	Sox17	protein_coding	Cluster0001
Sox18:ENSMUSG00000046470	ENSMUSG00000046470	5	ensembl_havana	Sox18	protein_coding	Cluster0001
Sox7:ENSMUSG00000063060	ENSMUSG00000063060	5	ensembl	Sox7	protein_coding	Cluster0001
Sparc:ENSMUSG00000018593	ENSMUSG00000018593	12	ensembl_havana	Sparc	protein_coding	Cluster0001
Sparcl1:ENSMUSG00000029309	ENSMUSG00000029309	7	ensembl_havana	Sparcl1	protein_coding	Cluster0001
Speg:ENSMUSG00000026207	ENSMUSG00000026207	16	ensembl_havana	Speg	protein_coding	Cluster0001
Sphkap:ENSMUSG00000026163	ENSMUSG00000026163	17	ensembl_havana	Sphkap	protein_coding	Cluster0001
Spock1:ENSMUSG00000056222	ENSMUSG00000056222	14	ensembl_havana	Spock1	protein_coding	Cluster0001
Spock2:ENSMUSG00000058297	ENSMUSG00000058297	16	ensembl_havana	Spock2	protein_coding	Cluster0001
Spock3:ENSMUSG00000054162	ENSMUSG00000054162	15	ensembl_havana	Spock3	protein_coding	Cluster0001
Spon1:ENSMUSG00000038156	ENSMUSG00000038156	15	ensembl_havana	Spon1	protein_coding	Cluster0001
Spon2:ENSMUSG00000037379	ENSMUSG00000037379	7	ensembl_havana	Spon2	protein_coding	Cluster0001
Sprn:ENSMUSG00000045733	ENSMUSG00000045733	7	ensembl_havana	Sprn	protein_coding	Cluster0001
Spry1:ENSMUSG00000037211	ENSMUSG00000037211	12	ensembl_havana	Spry1	protein_coding	Cluster0001
Spry4:ENSMUSG00000024427	ENSMUSG00000024427	6	ensembl	Spry4	protein_coding	Cluster0001
Srpx:ENSMUSG00000090084	ENSMUSG00000090084	7	ensembl_havana	Srpx	protein_coding	Cluster0001
Srpx2:ENSMUSG00000031253	ENSMUSG00000031253	15	ensembl_havana	Srpx2	protein_coding	Cluster0001
Ssbp2:ENSMUSG00000003992	ENSMUSG00000003992	14	ensembl_havana	Ssbp2	protein_coding	Cluster0001
Ssc5d:ENSMUSG00000035279	ENSMUSG00000035279	8	ensembl_havana	Ssc5d	protein_coding	Cluster0001
Sspn:ENSMUSG00000030255	ENSMUSG00000030255	13	ensembl_havana	Sspn	protein_coding	Cluster0001
Sstr1:ENSMUSG00000035431	ENSMUSG00000035431	4	ensembl_havana	Sstr1	protein_coding	Cluster0001
Sstr4:ENSMUSG00000037014	ENSMUSG00000037014	4	ensembl_havana	Sstr4	protein_coding	Cluster0001
Ssu2:ENSMUSG00000034387	ENSMUSG00000034387	12	ensembl_havana	Ssu2	protein_coding	Cluster0001
Stac:ENSMUSG00000032502	ENSMUSG00000032502	8	ensembl_havana	Stac	protein_coding	Cluster0001
Stard8:ENSMUSG00000031216	ENSMUSG00000031216	13	ensembl_havana	Stard8	protein_coding	Cluster0001
Stbd1:ENSMUSG00000047963	ENSMUSG00000047963	7	ensembl_havana	Stbd1	protein_coding	Cluster0001
Stc1:ENSMUSG00000014813	ENSMUSG00000014813	8	ensembl	Stc1	protein_coding	Cluster0001
Stk32a:ENSMUSG00000039954	ENSMUSG00000039954	8	ensembl	Stk32a	protein_coding	Cluster0001
Stk38l:ENSMUSG00000001630	ENSMUSG00000001630	13	ensembl_havana	Stk38l	protein_coding	Cluster0001
Stmn2:ENSMUSG00000027500	ENSMUSG00000027500	10	ensembl_havana	Stmn2	protein_coding	Cluster0001
Stmn3:ENSMUSG00000027581	ENSMUSG00000027581	12	ensembl_havana	Stmn3	protein_coding	Cluster0001
Stmn4:ENSMUSG00000022044	ENSMUSG00000022044	14	ensembl_havana	Stmn4	protein_coding	Cluster0001
Stmnd1:ENSMUSG00000063529	ENSMUSG00000063529	3	ensembl	Stmnd1	protein_coding	Cluster0001
Sult4a1:ENSMUSG00000018865	ENSMUSG00000018865	8	ensembl	Sult4a1	protein_coding	Cluster0001
Sv2a:ENSMUSG00000038486	ENSMUSG00000038486	9	ensembl_havana	Sv2a	protein_coding	Cluster0001
Sv2b:ENSMUSG00000053025	ENSMUSG00000053025	13	ensembl_havana	Sv2b	protein_coding	Cluster0001
Svep1:ENSMUSG00000028369	ENSMUSG00000028369	15	ensembl_havana	Svep1	protein_coding	Cluster0001
Syde1:ENSMUSG00000032714	ENSMUSG00000032714	6	ensembl	Syde1	protein_coding	Cluster0001
Syn1:ENSMUSG00000037217	ENSMUSG00000037217	15	ensembl_havana	Syn1	protein_coding	Cluster0001
Syn2:ENSMUSG00000009394	ENSMUSG00000009394	13	ensembl_havana	Syn2	protein_coding	Cluster0001
Syndig1:ENSMUSG00000074736	ENSMUSG00000074736	10	ensembl_havana	Syndig1	protein_coding	Cluster0001
Syngr1:ENSMUSG00000022415	ENSMUSG00000022415	12	ensembl_havana	Syngr1	protein_coding	Cluster0001
Syngr3:ENSMUSG00000007021	ENSMUSG00000007021	4	ensembl_havana	Syngr3	protein_coding	Cluster0001
Synm:ENSMUSG00000030554	ENSMUSG00000030554	16	ensembl_havana	Synm	protein_coding	Cluster0001
Synpo2:ENSMUSG00000050315	ENSMUSG00000050315	13	ensembl_havana	Synpo2	protein_coding	Cluster0001
Syp:ENSMUSG00000031144	ENSMUSG00000031144	15	ensembl_havana	Syp	protein_coding	Cluster0001
Syt1:ENSMUSG00000035864	ENSMUSG00000035864	14	ensembl_havana	Syt1	protein_coding	Cluster0001
Syt13:ENSMUSG00000027220	ENSMUSG00000027220	2	ensembl_havana	Syt13	protein_coding	Cluster0001
Syt15:ENSMUSG00000041479	ENSMUSG00000041479	13	ensembl_havana	Syt15	protein_coding	Cluster0001
Syt17:ENSMUSG00000058420	ENSMUSG00000058420	8	ensembl_havana	Syt17	protein_coding	Cluster0001
Syt4:ENSMUSG00000024261	ENSMUSG00000024261	5	ensembl	Syt4	protein_coding	Cluster0001
Syt6:ENSMUSG00000027849	ENSMUSG00000027849	18	ensembl_havana	Syt6	protein_coding	Cluster0001
Syt9:ENSMUSG00000062542	ENSMUSG00000062542	11	ensembl_havana	Syt9	protein_coding	Cluster0001
Tacr1:ENSMUSG00000030043	ENSMUSG00000030043	11	ensembl_havana	Tacr1	protein_coding	Cluster0001
Tacr2:ENSMUSG00000020081	ENSMUSG00000020081	5	ensembl	Tacr2	protein_coding	Cluster0001
Tacr3:ENSMUSG00000028172	ENSMUSG00000028172	5	ensembl_havana	Tacr3	protein_coding	Cluster0001
Tagln:ENSMUSG00000032085	ENSMUSG00000032085	4	ensembl	Tagln	protein_coding	Cluster0001
Tagln3:ENSMUSG00000022658	ENSMUSG00000022658	10	ensembl_havana	Tagln3	protein_coding	Cluster0001
Tanc2:ENSMUSG00000053580	ENSMUSG00000053580	16	ensembl_havana	Tanc2	protein_coding	Cluster0001
Tbx2:ENSMUSG00000000093	ENSMUSG00000000093	6	ensembl_havana	Tbx2	protein_coding	Cluster0001
Tbxas1:ENSMUSG00000029925	ENSMUSG00000029925	13	ensembl_havana	Tbxas1	protein_coding	Cluster0001
Tcaf1:ENSMUSG00000036667	ENSMUSG00000036667	14	ensembl_havana	Tcaf1	protein_coding	Cluster0001
Tceal1:ENSMUSG00000049536	ENSMUSG00000049536	5	ensembl_havana	Tceal1	protein_coding	Cluster0001
Tceal3:ENSMUSG00000044550	ENSMUSG00000044550	11	ensembl_havana	Tceal3	protein_coding	Cluster0001
Tceal6:ENSMUSG00000031409	ENSMUSG00000031409	1	ensembl_havana	Tceal6	protein_coding	Cluster0001
Tcf21:ENSMUSG00000045680	ENSMUSG00000045680	7	ensembl	Tcf21	protein_coding	Cluster0001
Tcp11l1:ENSMUSG00000027175	ENSMUSG00000027175	10	ensembl_havana	Tcp11l1	protein_coding	Cluster0001
Tctn2:ENSMUSG00000029386	ENSMUSG00000029386	15	ensembl_havana	Tctn2	processed_transcript	Cluster0001
Tdrkh:ENSMUSG00000041912	ENSMUSG00000041912	12	ensembl_havana	Tdrkh	protein_coding	Cluster0001
Tek:ENSMUSG00000006386	ENSMUSG00000006386	15	ensembl_havana	Tek	protein_coding	Cluster0001
Tgfb1i1:ENSMUSG00000030782	ENSMUSG00000030782	15	ensembl_havana	Tgfb1i1	protein_coding	Cluster0001
Tgfb2:ENSMUSG00000039239	ENSMUSG00000039239	14	ensembl_havana	Tgfb2	protein_coding	Cluster0001
Tgfb3:ENSMUSG00000021253	ENSMUSG00000021253	6	ensembl	Tgfb3	protein_coding	Cluster0001
Tgfbr3:ENSMUSG00000029287	ENSMUSG00000029287	14	ensembl_havana	Tgfbr3	protein_coding	Cluster0001
Thbd:ENSMUSG00000074743	ENSMUSG00000074743	4	ensembl_havana	Thbd	protein_coding	Cluster0001
Thbs2:ENSMUSG00000023885	ENSMUSG00000023885	8	ensembl	Thbs2	protein_coding	Cluster0001
Thbs3:ENSMUSG00000028047	ENSMUSG00000028047	11	ensembl_havana	Thbs3	protein_coding	Cluster0001
Thsd4:ENSMUSG00000032289	ENSMUSG00000032289	15	ensembl_havana	Thsd4	protein_coding	Cluster0001
Thsd7a:ENSMUSG00000032625	ENSMUSG00000032625	14	ensembl_havana	Thsd7a	protein_coding	Cluster0001
Thsd7b:ENSMUSG00000042581	ENSMUSG00000042581	14	ensembl_havana	Thsd7b	protein_coding	Cluster0001
Tie1:ENSMUSG00000033191	ENSMUSG00000033191	14	ensembl_havana	Tie1	protein_coding	Cluster0001
Tifab:ENSMUSG00000049625	ENSMUSG00000049625	5	ensembl	Tifab	protein_coding	Cluster0001
Tigar:ENSMUSG00000038028	ENSMUSG00000038028	9	ensembl_havana	Tigar	protein_coding	Cluster0001
Timp2:ENSMUSG00000017466	ENSMUSG00000017466	9	ensembl_havana	Timp2	protein_coding	Cluster0001
Timp3:ENSMUSG00000020044	ENSMUSG00000020044	13	ensembl_havana	Timp3	protein_coding	Cluster0001
Tll1:ENSMUSG00000053626	ENSMUSG00000053626	4	ensembl	Tll1	protein_coding	Cluster0001
Tlr11:ENSMUSG00000051969	ENSMUSG00000051969	7	ensembl_havana	Tlr11	protein_coding	Cluster0001
Tlx2:ENSMUSG00000068327	ENSMUSG00000068327	5	ensembl_havana	Tlx2	protein_coding	Cluster0001
Tmc3:ENSMUSG00000038540	ENSMUSG00000038540	14	ensembl_havana	Tmc3	protein_coding	Cluster0001
Tmcc2:ENSMUSG00000042066	ENSMUSG00000042066	15	ensembl_havana	Tmcc2	protein_coding	Cluster0001
Tmem100:ENSMUSG00000069763	ENSMUSG00000069763	3	ensembl_havana	Tmem100	protein_coding	Cluster0001
Tmem119:ENSMUSG00000054675	ENSMUSG00000054675	5	ensembl_havana	Tmem119	protein_coding	Cluster0001
Tmem130:ENSMUSG00000043388	ENSMUSG00000043388	8	ensembl_havana	Tmem130	protein_coding	Cluster0001
Tmem132b:ENSMUSG00000070498	ENSMUSG00000070498	3	ensembl_havana	Tmem132b	protein_coding	Cluster0001
Tmem132e:ENSMUSG00000020701	ENSMUSG00000020701	12	ensembl_havana	Tmem132e	protein_coding	Cluster0001
Tmem136:ENSMUSG00000048503	ENSMUSG00000048503	6	ensembl	Tmem136	protein_coding	Cluster0001
Tmem178:ENSMUSG00000024245	ENSMUSG00000024245	4	ensembl	Tmem178	protein_coding	Cluster0001
Tmem178b:ENSMUSG00000057716	ENSMUSG00000057716	6	ensembl_havana	Tmem178b	protein_coding	Cluster0001
Tmem179:ENSMUSG00000054013	ENSMUSG00000054013	5	ensembl	Tmem179	protein_coding	Cluster0001
Tmem200a:ENSMUSG00000049420	ENSMUSG00000049420	8	ensembl	Tmem200a	protein_coding	Cluster0001
Tmem200b:ENSMUSG00000070720	ENSMUSG00000070720	3	ensembl	Tmem200b	protein_coding	Cluster0001
Tmem200c:ENSMUSG00000095407	ENSMUSG00000095407	1	ensembl	Tmem200c	protein_coding	Cluster0001
Tmem204:ENSMUSG00000024168	ENSMUSG00000024168	7	ensembl_havana	Tmem204	protein_coding	Cluster0001
Tmem255a:ENSMUSG00000036502	ENSMUSG00000036502	14	ensembl_havana	Tmem255a	protein_coding	Cluster0001
Tmem255b:ENSMUSG00000038457	ENSMUSG00000038457	16	ensembl	Tmem255b	protein_coding	Cluster0001
Tmem35:ENSMUSG00000033578	ENSMUSG00000033578	7	ensembl_havana	Tmem35	protein_coding	Cluster0001
Tmem47:ENSMUSG00000025666	ENSMUSG00000025666	16	ensembl_havana	Tmem47	protein_coding	Cluster0001
Tmem59l:ENSMUSG00000035964	ENSMUSG00000035964	7	ensembl	Tmem59l	protein_coding	Cluster0001
Tmem74:ENSMUSG00000054409	ENSMUSG00000054409	4	ensembl	Tmem74	protein_coding	Cluster0001
Tmem88:ENSMUSG00000045377	ENSMUSG00000045377	5	ensembl_havana	Tmem88	protein_coding	Cluster0001
Tmem8b:ENSMUSG00000078716	ENSMUSG00000078716	9	ensembl_havana	Tmem8b	protein_coding	Cluster0001
Tmod1:ENSMUSG00000028328	ENSMUSG00000028328	13	ensembl_havana	Tmod1	protein_coding	Cluster0001
Tmprss5:ENSMUSG00000032268	ENSMUSG00000032268	13	ensembl_havana	Tmprss5	protein_coding	Cluster0001
Tmtc1:ENSMUSG00000030306	ENSMUSG00000030306	14	ensembl_havana	Tmtc1	protein_coding	Cluster0001
Tnc:ENSMUSG00000028364	ENSMUSG00000028364	15	ensembl_havana	Tnc	protein_coding	Cluster0001
Tnfrsf19:ENSMUSG00000060548	ENSMUSG00000060548	12	ensembl	Tnfrsf19	protein_coding	Cluster0001
Tnfsf12:ENSMUSG00000097328	ENSMUSG00000097328	7	ensembl_havana	Tnfsf12	protein_coding	Cluster0001
Tnnt2:ENSMUSG00000026414	ENSMUSG00000026414	13	ensembl_havana	Tnnt2	protein_coding	Cluster0001
Tns1:ENSMUSG00000055322	ENSMUSG00000055322	14	ensembl_havana	Tns1	protein_coding	Cluster0001
Tnxb:ENSMUSG00000033327	ENSMUSG00000033327	16	ensembl_havana	Tnxb	protein_coding	Cluster0001
Tpbgl:ENSMUSG00000096606	ENSMUSG00000096606	2	ensembl_havana	Tpbgl	protein_coding	Cluster0001
Tpm1:ENSMUSG00000032366	ENSMUSG00000032366	15	ensembl_havana	Tpm1	protein_coding	Cluster0001
Tpm2:ENSMUSG00000028464	ENSMUSG00000028464	16	ensembl_havana	Tpm2	protein_coding	Cluster0001
Tram1l1:ENSMUSG00000044528	ENSMUSG00000044528	5	ensembl_havana	Tram1l1	protein_coding	Cluster0001
Trdn:ENSMUSG00000019787	ENSMUSG00000019787	8	ensembl	Trdn	protein_coding	Cluster0001
Tril:ENSMUSG00000043496	ENSMUSG00000043496	7	ensembl_havana	Tril	protein_coding	Cluster0001
Trim3:ENSMUSG00000036989	ENSMUSG00000036989	15	ensembl_havana	Trim3	protein_coding	Cluster0001
Trim47:ENSMUSG00000020773	ENSMUSG00000020773	11	ensembl_havana	Trim47	protein_coding	Cluster0001
Trip6:ENSMUSG00000023348	ENSMUSG00000023348	11	ensembl_havana	Trip6	protein_coding	Cluster0001
Trnp1:ENSMUSG00000056596	ENSMUSG00000056596	8	ensembl_havana	Trnp1	protein_coding	Cluster0001
Tro:ENSMUSG00000025272	ENSMUSG00000025272	16	ensembl_havana	Tro	protein_coding	Cluster0001
Trpc1:ENSMUSG00000032839	ENSMUSG00000032839	13	ensembl_havana	Trpc1	protein_coding	Cluster0001
Trpc3:ENSMUSG00000027716	ENSMUSG00000027716	13	ensembl_havana	Trpc3	protein_coding	Cluster0001
Trpc4:ENSMUSG00000027748	ENSMUSG00000027748	11	ensembl_havana	Trpc4	protein_coding	Cluster0001
Trpc6:ENSMUSG00000031997	ENSMUSG00000031997	8	ensembl	Trpc6	protein_coding	Cluster0001
Tshz2:ENSMUSG00000047907	ENSMUSG00000047907	11	ensembl_havana	Tshz2	protein_coding	Cluster0001
Tshz3:ENSMUSG00000021217	ENSMUSG00000021217	7	ensembl_havana	Tshz3	protein_coding	Cluster0001
Tspan18:ENSMUSG00000027217	ENSMUSG00000027217	13	ensembl_havana	Tspan18	protein_coding	Cluster0001
Tspan2:ENSMUSG00000027858	ENSMUSG00000027858	13	ensembl_havana	Tspan2	protein_coding	Cluster0001
Tspan9:ENSMUSG00000030352	ENSMUSG00000030352	14	ensembl_havana	Tspan9	protein_coding	Cluster0001
Tspyl4:ENSMUSG00000039485	ENSMUSG00000039485	7	ensembl_havana	Tspyl4	protein_coding	Cluster0001
Tspyl5:ENSMUSG00000038984	ENSMUSG00000038984	3	ensembl	Tspyl5	protein_coding	Cluster0001
Ttc12:ENSMUSG00000040219	ENSMUSG00000040219	4	ensembl_havana	Ttc12	protein_coding	Cluster0001
Ttc28:ENSMUSG00000033209	ENSMUSG00000033209	17	ensembl_havana	Ttc28	protein_coding	Cluster0001
Ttc9:ENSMUSG00000042734	ENSMUSG00000042734	5	ensembl	Ttc9	protein_coding	Cluster0001
Ttl:ENSMUSG00000027394	ENSMUSG00000027394	13	ensembl_havana	Ttl	protein_coding	Cluster0001
Ttll7:ENSMUSG00000036745	ENSMUSG00000036745	15	ensembl_havana	Ttll7	protein_coding	Cluster0001
Tub:ENSMUSG00000031028	ENSMUSG00000031028	14	ensembl_havana	Tub	protein_coding	Cluster0001
Tubb3:ENSMUSG00000062380	ENSMUSG00000062380	3	ensembl_havana	Tubb3	protein_coding	Cluster0001
Tubb4a:ENSMUSG00000062591	ENSMUSG00000062591	5	ensembl	Tubb4a	protein_coding	Cluster0001
Tubb6:ENSMUSG00000001473	ENSMUSG00000001473	6	ensembl	Tubb6	protein_coding	Cluster0001
Twist1:ENSMUSG00000035799	ENSMUSG00000035799	5	ensembl	Twist1	protein_coding	Cluster0001
Twsg1:ENSMUSG00000024098	ENSMUSG00000024098	5	ensembl	Twsg1	protein_coding	Cluster0001
Uchl1:ENSMUSG00000029223	ENSMUSG00000029223	12	ensembl_havana	Uchl1	protein_coding	Cluster0001
Unc45b:ENSMUSG00000018845	ENSMUSG00000018845	14	ensembl_havana	Unc45b	protein_coding	Cluster0001
Usp13:ENSMUSG00000056900	ENSMUSG00000056900	13	ensembl_havana	Usp13	protein_coding	Cluster0001
Vash1:ENSMUSG00000021256	ENSMUSG00000021256	5	ensembl_havana	Vash1	protein_coding	Cluster0001
Vasn:ENSMUSG00000039646	ENSMUSG00000039646	5	ensembl_havana	Vasn	protein_coding	Cluster0001
Vat1l:ENSMUSG00000046844	ENSMUSG00000046844	6	ensembl_havana	Vat1l	protein_coding	Cluster0001
Vcan:ENSMUSG00000021614	ENSMUSG00000021614	16	ensembl_havana	Vcan	protein_coding	Cluster0001
Vegfb:ENSMUSG00000024962	ENSMUSG00000024962	13	ensembl_havana	Vegfb	protein_coding	Cluster0001
Vgll3:ENSMUSG00000091243	ENSMUSG00000091243	1	ensembl	Vgll3	protein_coding	Cluster0001
Vstm4:ENSMUSG00000050666	ENSMUSG00000050666	13	ensembl_havana	Vstm4	protein_coding	Cluster0001
Vtn:ENSMUSG00000017344	ENSMUSG00000017344	4	ensembl_havana	Vtn	protein_coding	Cluster0001
Vwf:ENSMUSG00000001930	ENSMUSG00000001930	17	ensembl_havana	Vwf	protein_coding	Cluster0001
Wasf3:ENSMUSG00000029636	ENSMUSG00000029636	10	ensembl_havana	Wasf3	protein_coding	Cluster0001
Wdr35:ENSMUSG00000066643	ENSMUSG00000066643	12	ensembl_havana	Wdr35	protein_coding	Cluster0001
Wfdc1:ENSMUSG00000023336	ENSMUSG00000023336	5	ensembl	Wfdc1	protein_coding	Cluster0001
Wfikkn2:ENSMUSG00000044177	ENSMUSG00000044177	4	ensembl_havana	Wfikkn2	protein_coding	Cluster0001
Wisp1:ENSMUSG00000005124	ENSMUSG00000005124	9	ensembl_havana	Wisp1	protein_coding	Cluster0001
Wls:ENSMUSG00000028173	ENSMUSG00000028173	10	ensembl_havana	Wls	protein_coding	Cluster0001
Wnt2b:ENSMUSG00000027840	ENSMUSG00000027840	5	ensembl_havana	Wnt2b	protein_coding	Cluster0001
Wnt9a:ENSMUSG00000000126	ENSMUSG00000000126	11	ensembl_havana	Wnt9a	protein_coding	Cluster0001
Wscd2:ENSMUSG00000063430	ENSMUSG00000063430	9	ensembl_havana	Wscd2	protein_coding	Cluster0001
Wwc2:ENSMUSG00000031563	ENSMUSG00000031563	7	ensembl	Wwc2	protein_coding	Cluster0001
Wwtr1:ENSMUSG00000027803	ENSMUSG00000027803	14	ensembl_havana	Wwtr1	protein_coding	Cluster0001
Xcr1:ENSMUSG00000060509	ENSMUSG00000060509	4	ensembl_havana	Xcr1	protein_coding	Cluster0001
Zak:ENSMUSG00000004085	ENSMUSG00000004085	14	ensembl_havana	Zak	protein_coding	Cluster0001
Zbtb16:ENSMUSG00000066687	ENSMUSG00000066687	4	ensembl	Zbtb16	protein_coding	Cluster0001
Zc2hc1a:ENSMUSG00000043542	ENSMUSG00000043542	12	ensembl_havana	Zc2hc1a	protein_coding	Cluster0001
Zc3h12b:ENSMUSG00000035045	ENSMUSG00000035045	17	ensembl_havana	Zc3h12b	protein_coding	Cluster0001
Zcchc12:ENSMUSG00000036699	ENSMUSG00000036699	12	ensembl_havana	Zcchc12	protein_coding	Cluster0001
Zcchc24:ENSMUSG00000055538	ENSMUSG00000055538	7	ensembl_havana	Zcchc24	protein_coding	Cluster0001
Zeb1:ENSMUSG00000024238	ENSMUSG00000024238	13	ensembl_havana	Zeb1	protein_coding	Cluster0001
Zfhx4:ENSMUSG00000025255	ENSMUSG00000025255	18	ensembl_havana	Zfhx4	protein_coding	Cluster0001
Zfp13:ENSMUSG00000062012	ENSMUSG00000062012	13	ensembl	Zfp13	protein_coding	Cluster0001
Zfp248:ENSMUSG00000030145	ENSMUSG00000030145	14	ensembl_havana	Zfp248	protein_coding	Cluster0001
Zfp286:ENSMUSG00000047342	ENSMUSG00000047342	17	ensembl_havana	Zfp286	protein_coding	Cluster0001
Zfp30:ENSMUSG00000047473	ENSMUSG00000047473	14	ensembl_havana	Zfp30	protein_coding	Cluster0001
Zfp334:ENSMUSG00000017667	ENSMUSG00000017667	9	ensembl_havana	Zfp334	protein_coding	Cluster0001
Zfp365:ENSMUSG00000037855	ENSMUSG00000037855	15	ensembl_havana	Zfp365	protein_coding	Cluster0001
Zfp367:ENSMUSG00000044934	ENSMUSG00000044934	12	ensembl_havana	Zfp367	protein_coding	Cluster0001
Zfp423:ENSMUSG00000045333	ENSMUSG00000045333	15	ensembl_havana	Zfp423	protein_coding	Cluster0001
Zfp449:ENSMUSG00000073176	ENSMUSG00000073176	4	ensembl_havana	Zfp449	protein_coding	Cluster0001
Zfp521:ENSMUSG00000024420	ENSMUSG00000024420	8	ensembl	Zfp521	protein_coding	Cluster0001
Zfp532:ENSMUSG00000042439	ENSMUSG00000042439	12	ensembl_havana	Zfp532	protein_coding	Cluster0001
Zfp641:ENSMUSG00000022987	ENSMUSG00000022987	11	ensembl	Zfp641	protein_coding	Cluster0001
Zfp651:ENSMUSG00000013419	ENSMUSG00000013419	6	ensembl	Zfp651	protein_coding	Cluster0001
Zfp804a:ENSMUSG00000070866	ENSMUSG00000070866	4	ensembl_havana	Zfp804a	protein_coding	Cluster0001
Zfp9:ENSMUSG00000072623	ENSMUSG00000072623	6	ensembl_havana	Zfp9	protein_coding	Cluster0001
Zfpm2:ENSMUSG00000022306	ENSMUSG00000022306	8	ensembl	Zfpm2	protein_coding	Cluster0001
1700026L06Rik:ENSMUSG00000026809	ENSMUSG00000026809	15	ensembl_havana	1700026L06Rik	protein_coding	Cluster0002
2010309G21Rik:ENSMUSG00000106567	ENSMUSG00000106567	1	havana	2010309G21Rik	antisense	Cluster0002
36951:ENSMUSG00000036469	ENSMUSG00000036469	16	ensembl_havana	2001-03-01	protein_coding	Cluster0002
37135:ENSMUSG00000000486	ENSMUSG00000000486	13	ensembl_havana	2001-09-01	protein_coding	Cluster0002
4930426D05Rik:ENSMUSG00000043168	ENSMUSG00000043168	12	ensembl_havana	4930426D05Rik	antisense	Cluster0002
4933424M12Rik:ENSMUSG00000087289	ENSMUSG00000087289	2	havana	4933424M12Rik	lincRNA	Cluster0002
5031414D18Rik:ENSMUSG00000034959	ENSMUSG00000034959	7	ensembl	5031414D18Rik	protein_coding	Cluster0002
5430421N21Rik:ENSMUSG00000067613	ENSMUSG00000067613	5	ensembl_havana	5430421N21Rik	protein_coding	Cluster0002
5430427O19Rik:ENSMUSG00000025058	ENSMUSG00000025058	4	ensembl_havana	5430427O19Rik	protein_coding	Cluster0002
6030468B19Rik:ENSMUSG00000025573	ENSMUSG00000025573	4	ensembl_havana	6030468B19Rik	protein_coding	Cluster0002
8030453O22Rik:ENSMUSG00000085058	ENSMUSG00000085058	2	havana	8030453O22Rik	processed_transcript	Cluster0002
9930111J21Rik1:ENSMUSG00000069893	ENSMUSG00000069893	10	ensembl_havana	9930111J21Rik1	protein_coding	Cluster0002
9930111J21Rik2:ENSMUSG00000069892	ENSMUSG00000069892	9	ensembl_havana	9930111J21Rik2	protein_coding	Cluster0002
A530030E21Rik:ENSMUSG00000105160	ENSMUSG00000105160	1	havana	A530030E21Rik	TEC	Cluster0002
A530040E14Rik:ENSMUSG00000072109	ENSMUSG00000072109	11	ensembl_havana	A530040E14Rik	antisense	Cluster0002
A630001G21Rik:ENSMUSG00000052760	ENSMUSG00000052760	15	ensembl_havana	A630001G21Rik	protein_coding	Cluster0002
A630033H20Rik:ENSMUSG00000054293	ENSMUSG00000054293	10	ensembl_havana	A630033H20Rik	protein_coding	Cluster0002
AB124611:ENSMUSG00000057191	ENSMUSG00000057191	13	ensembl_havana	AB124611	protein_coding	Cluster0002
Acap1:ENSMUSG00000001588	ENSMUSG00000001588	12	ensembl_havana	Acap1	protein_coding	Cluster0002
Adrb2:ENSMUSG00000045730	ENSMUSG00000045730	3	ensembl	Adrb2	protein_coding	Cluster0002
Adssl1:ENSMUSG00000011148	ENSMUSG00000011148	13	ensembl	Adssl1	protein_coding	Cluster0002
Aff3:ENSMUSG00000037138	ENSMUSG00000037138	16	ensembl_havana	Aff3	protein_coding	Cluster0002
Agap2:ENSMUSG00000025422	ENSMUSG00000025422	8	ensembl	Agap2	protein_coding	Cluster0002
AI467606:ENSMUSG00000045165	ENSMUSG00000045165	6	ensembl_havana	AI467606	protein_coding	Cluster0002
AI504432:ENSMUSG00000056145	ENSMUSG00000056145	5	ensembl_havana	AI504432	lincRNA	Cluster0002
Akap5:ENSMUSG00000021057	ENSMUSG00000021057	15	ensembl_havana	Akap5	protein_coding	Cluster0002
Akna:ENSMUSG00000039158	ENSMUSG00000039158	11	ensembl_havana	Akna	protein_coding	Cluster0002
Ankrd33b:ENSMUSG00000022237	ENSMUSG00000022237	16	ensembl_havana	Ankrd33b	protein_coding	Cluster0002
Ankrd44:ENSMUSG00000052331	ENSMUSG00000052331	14	ensembl_havana	Ankrd44	protein_coding	Cluster0002
Apbb1ip:ENSMUSG00000026786	ENSMUSG00000026786	14	ensembl_havana	Apbb1ip	protein_coding	Cluster0002
Apobec3:ENSMUSG00000009585	ENSMUSG00000009585	17	ensembl_havana	Apobec3	protein_coding	Cluster0002
Arhgap15:ENSMUSG00000049744	ENSMUSG00000049744	15	ensembl_havana	Arhgap15	protein_coding	Cluster0002
Arhgap25:ENSMUSG00000030047	ENSMUSG00000030047	14	ensembl_havana	Arhgap25	protein_coding	Cluster0002
Arhgap27os3:ENSMUSG00000085887	ENSMUSG00000085887	2	havana	Arhgap27os3	antisense	Cluster0002
Arhgap30:ENSMUSG00000048865	ENSMUSG00000048865	16	ensembl_havana	Arhgap30	protein_coding	Cluster0002
Arhgap4:ENSMUSG00000031389	ENSMUSG00000031389	17	ensembl_havana	Arhgap4	protein_coding	Cluster0002
Arhgap9:ENSMUSG00000040345	ENSMUSG00000040345	9	ensembl	Arhgap9	protein_coding	Cluster0002
Arhgdib:ENSMUSG00000030220	ENSMUSG00000030220	13	ensembl_havana	Arhgdib	protein_coding	Cluster0002
Arhgef6:ENSMUSG00000031133	ENSMUSG00000031133	12	ensembl_havana	Arhgef6	protein_coding	Cluster0002
Arid5a:ENSMUSG00000037447	ENSMUSG00000037447	16	ensembl_havana	Arid5a	protein_coding	Cluster0002
Arl5c:ENSMUSG00000038352	ENSMUSG00000038352	15	ensembl_havana	Arl5c	protein_coding	Cluster0002
Atp10d:ENSMUSG00000046808	ENSMUSG00000046808	17	ensembl_havana	Atp10d	polymorphic_pseudogene	Cluster0002
B3gnt5:ENSMUSG00000022686	ENSMUSG00000022686	14	ensembl_havana	B3gnt5	protein_coding	Cluster0002
B3gnt8:ENSMUSG00000059479	ENSMUSG00000059479	7	ensembl_havana	B3gnt8	protein_coding	Cluster0002
Bank1:ENSMUSG00000037922	ENSMUSG00000037922	13	ensembl_havana	Bank1	protein_coding	Cluster0002
Basp1:ENSMUSG00000045763	ENSMUSG00000045763	7	ensembl	Basp1	protein_coding	Cluster0002
Batf:ENSMUSG00000034266	ENSMUSG00000034266	5	ensembl_havana	Batf	protein_coding	Cluster0002
BC035044:ENSMUSG00000090164	ENSMUSG00000090164	8	ensembl_havana	BC035044	protein_coding	Cluster0002
Bcat1:ENSMUSG00000030268	ENSMUSG00000030268	17	ensembl_havana	Bcat1	protein_coding	Cluster0002
Bcl11a:ENSMUSG00000000861	ENSMUSG00000000861	15	ensembl_havana	Bcl11a	protein_coding	Cluster0002
Bcl6:ENSMUSG00000022508	ENSMUSG00000022508	5	ensembl_havana	Bcl6	protein_coding	Cluster0002
Bcl7a:ENSMUSG00000029438	ENSMUSG00000029438	9	ensembl_havana	Bcl7a	protein_coding	Cluster0002
BE692007:ENSMUSG00000099757	ENSMUSG00000099757	1	havana	BE692007	processed_transcript	Cluster0002
Bfsp2:ENSMUSG00000032556	ENSMUSG00000032556	10	ensembl_havana	Bfsp2	protein_coding	Cluster0002
Bin2:ENSMUSG00000098112	ENSMUSG00000098112	7	havana	Bin2	protein_coding	Cluster0002
Blk:ENSMUSG00000014453	ENSMUSG00000014453	3	ensembl	Blk	protein_coding	Cluster0002
Bmyc:ENSMUSG00000049086	ENSMUSG00000049086	8	ensembl_havana	Bmyc	protein_coding	Cluster0002
Btbd19:ENSMUSG00000073771	ENSMUSG00000073771	11	ensembl_havana	Btbd19	protein_coding	Cluster0002
Btk:ENSMUSG00000031264	ENSMUSG00000031264	13	ensembl_havana	Btk	protein_coding	Cluster0002
Btla:ENSMUSG00000052013	ENSMUSG00000052013	14	ensembl_havana	Btla	protein_coding	Cluster0002
C920009B18Rik:ENSMUSG00000097352	ENSMUSG00000097352	7	havana	C920009B18Rik	transcribed_unprocessed_pseudogene	Cluster0002
CAAA01098150.1:ENSMUSG00000094621	ENSMUSG00000094621	1	ensembl	CAAA01098150.1	miRNA	Cluster0002
Cacna1d:ENSMUSG00000015968	ENSMUSG00000015968	16	ensembl	Cacna1d	protein_coding	Cluster0002
Cacna1i:ENSMUSG00000022416	ENSMUSG00000022416	15	ensembl_havana	Cacna1i	protein_coding	Cluster0002
Capg:ENSMUSG00000056737	ENSMUSG00000056737	14	ensembl_havana	Capg	protein_coding	Cluster0002
Card11:ENSMUSG00000036526	ENSMUSG00000036526	8	ensembl_havana	Card11	protein_coding	Cluster0002
Cbfb:ENSMUSG00000031885	ENSMUSG00000031885	13	ensembl_havana	Cbfb	protein_coding	Cluster0002
Ccdc79:ENSMUSG00000052616	ENSMUSG00000052616	10	ensembl_havana	Ccdc79	protein_coding	Cluster0002
Ccm2:ENSMUSG00000000378	ENSMUSG00000000378	15	ensembl_havana	Ccm2	protein_coding	Cluster0002
Ccr4:ENSMUSG00000047898	ENSMUSG00000047898	6	ensembl	Ccr4	protein_coding	Cluster0002
Ccr7:ENSMUSG00000037944	ENSMUSG00000037944	8	ensembl_havana	Ccr7	protein_coding	Cluster0002
Cd180:ENSMUSG00000021624	ENSMUSG00000021624	9	ensembl_havana	Cd180	protein_coding	Cluster0002
Cd19:ENSMUSG00000030724	ENSMUSG00000030724	7	ensembl_havana	Cd19	protein_coding	Cluster0002
Cd2:ENSMUSG00000027863	ENSMUSG00000027863	8	ensembl_havana	Cd2	protein_coding	Cluster0002
Cd22:ENSMUSG00000030577	ENSMUSG00000030577	13	ensembl_havana	Cd22	protein_coding	Cluster0002
Cd37:ENSMUSG00000030798	ENSMUSG00000030798	14	ensembl	Cd37	protein_coding	Cluster0002
Cd37:ENSMUSG00000109208	ENSMUSG00000109208	1	ensembl	Cd37	protein_coding	Cluster0002
Cd40:ENSMUSG00000017652	ENSMUSG00000017652	16	ensembl_havana	Cd40	protein_coding	Cluster0002
Cd52:ENSMUSG00000000682	ENSMUSG00000000682	7	ensembl_havana	Cd52	protein_coding	Cluster0002
Cd53:ENSMUSG00000040747	ENSMUSG00000040747	9	ensembl_havana	Cd53	protein_coding	Cluster0002
Cd69:ENSMUSG00000030156	ENSMUSG00000030156	5	ensembl_havana	Cd69	protein_coding	Cluster0002
Cd72:ENSMUSG00000028459	ENSMUSG00000028459	11	ensembl_havana	Cd72	protein_coding	Cluster0002
Cd79a:ENSMUSG00000003379	ENSMUSG00000003379	7	ensembl_havana	Cd79a	protein_coding	Cluster0002
Cd79b:ENSMUSG00000040592	ENSMUSG00000040592	11	ensembl_havana	Cd79b	protein_coding	Cluster0002
Cd83:ENSMUSG00000015396	ENSMUSG00000015396	3	ensembl	Cd83	protein_coding	Cluster0002
Cdk5r1:ENSMUSG00000048895	ENSMUSG00000048895	13	ensembl_havana	Cdk5r1	protein_coding	Cluster0002
Celf2:ENSMUSG00000002107	ENSMUSG00000002107	18	ensembl_havana	Celf2	protein_coding	Cluster0002
Cfap43:ENSMUSG00000044948	ENSMUSG00000044948	16	ensembl_havana	Cfap43	protein_coding	Cluster0002
Cfp:ENSMUSG00000001128	ENSMUSG00000001128	7	ensembl_havana	Cfp	protein_coding	Cluster0002
Chst10:ENSMUSG00000026080	ENSMUSG00000026080	13	ensembl_havana	Chst10	protein_coding	Cluster0002
Chst3:ENSMUSG00000057337	ENSMUSG00000057337	13	ensembl_havana	Chst3	protein_coding	Cluster0002
Chsy1:ENSMUSG00000032640	ENSMUSG00000032640	10	ensembl_havana	Chsy1	protein_coding	Cluster0002
Clec2i:ENSMUSG00000030365	ENSMUSG00000030365	11	ensembl_havana	Clec2i	protein_coding	Cluster0002
Cmah:ENSMUSG00000016756	ENSMUSG00000016756	16	ensembl_havana	Cmah	protein_coding	Cluster0002
Cnn2:ENSMUSG00000004665	ENSMUSG00000004665	10	ensembl_havana	Cnn2	protein_coding	Cluster0002
Cnp:ENSMUSG00000006782	ENSMUSG00000006782	16	ensembl_havana	Cnp	protein_coding	Cluster0002
Cnr2:ENSMUSG00000062585	ENSMUSG00000062585	11	ensembl_havana	Cnr2	protein_coding	Cluster0002
Coch:ENSMUSG00000020953	ENSMUSG00000020953	16	ensembl	Coch	protein_coding	Cluster0002
Col17a1:ENSMUSG00000025064	ENSMUSG00000025064	14	ensembl_havana	Col17a1	protein_coding	Cluster0002
Coro1a:ENSMUSG00000030707	ENSMUSG00000030707	15	ensembl_havana	Coro1a	protein_coding	Cluster0002
Cotl1:ENSMUSG00000031827	ENSMUSG00000031827	12	ensembl	Cotl1	protein_coding	Cluster0002
Cpne5:ENSMUSG00000024008	ENSMUSG00000024008	15	ensembl_havana	Cpne5	protein_coding	Cluster0002
Cr2:ENSMUSG00000026616	ENSMUSG00000026616	14	ensembl_havana	Cr2	protein_coding	Cluster0002
Crip3:ENSMUSG00000023968	ENSMUSG00000023968	15	ensembl_havana	Crip3	protein_coding	Cluster0002
Crisp3:ENSMUSG00000025433	ENSMUSG00000025433	7	ensembl_havana	Crisp3	protein_coding	Cluster0002
Csf1:ENSMUSG00000014599	ENSMUSG00000014599	10	ensembl_havana	Csf1	protein_coding	Cluster0002
Csn2:ENSMUSG00000063157	ENSMUSG00000063157	9	ensembl_havana	Csn2	protein_coding	Cluster0002
Csrnp1:ENSMUSG00000032515	ENSMUSG00000032515	7	ensembl	Csrnp1	protein_coding	Cluster0002
Ctla4:ENSMUSG00000026011	ENSMUSG00000026011	13	ensembl_havana	Ctla4	protein_coding	Cluster0002
Cxcr4:ENSMUSG00000045382	ENSMUSG00000045382	6	ensembl_havana	Cxcr4	protein_coding	Cluster0002
Cxcr5:ENSMUSG00000047880	ENSMUSG00000047880	14	ensembl	Cxcr5	protein_coding	Cluster0002
Cybb:ENSMUSG00000015340	ENSMUSG00000015340	10	ensembl_havana	Cybb	protein_coding	Cluster0002
Cyfip2:ENSMUSG00000020340	ENSMUSG00000020340	16	ensembl_havana	Cyfip2	protein_coding	Cluster0002
Cyp4f18:ENSMUSG00000003484	ENSMUSG00000003484	4	ensembl_havana	Cyp4f18	protein_coding	Cluster0002
Cyth4:ENSMUSG00000018008	ENSMUSG00000018008	7	ensembl	Cyth4	protein_coding	Cluster0002
D5Ertd605e:ENSMUSG00000106820	ENSMUSG00000106820	1	havana	D5Ertd605e	lincRNA	Cluster0002
D930015E06Rik:ENSMUSG00000033767	ENSMUSG00000033767	14	ensembl_havana	D930015E06Rik	protein_coding	Cluster0002
Def6:ENSMUSG00000002257	ENSMUSG00000002257	7	ensembl_havana	Def6	protein_coding	Cluster0002
Dennd1c:ENSMUSG00000002668	ENSMUSG00000002668	7	ensembl	Dennd1c	protein_coding	Cluster0002
Dennd4a:ENSMUSG00000053641	ENSMUSG00000053641	8	ensembl	Dennd4a	protein_coding	Cluster0002
Dennd4b:ENSMUSG00000042404	ENSMUSG00000042404	16	ensembl_havana	Dennd4b	protein_coding	Cluster0002
Dock10:ENSMUSG00000038608	ENSMUSG00000038608	15	ensembl_havana	Dock10	protein_coding	Cluster0002
Dock11:ENSMUSG00000031093	ENSMUSG00000031093	14	ensembl_havana	Dock11	protein_coding	Cluster0002
Dock2:ENSMUSG00000020143	ENSMUSG00000020143	15	ensembl_havana	Dock2	protein_coding	Cluster0002
Dok3:ENSMUSG00000035711	ENSMUSG00000035711	4	ensembl	Dok3	protein_coding	Cluster0002
Dusp2:ENSMUSG00000027368	ENSMUSG00000027368	6	ensembl_havana	Dusp2	protein_coding	Cluster0002
Ebf1:ENSMUSG00000057098	ENSMUSG00000057098	14	ensembl_havana	Ebf1	protein_coding	Cluster0002
Egr2:ENSMUSG00000037868	ENSMUSG00000037868	15	ensembl_havana	Egr2	protein_coding	Cluster0002
Egr3:ENSMUSG00000033730	ENSMUSG00000033730	3	ensembl	Egr3	protein_coding	Cluster0002
Eif5a2:ENSMUSG00000050192	ENSMUSG00000050192	8	ensembl_havana	Eif5a2	protein_coding	Cluster0002
Ets1:ENSMUSG00000032035	ENSMUSG00000032035	15	ensembl_havana	Ets1	protein_coding	Cluster0002
Evl:ENSMUSG00000021262	ENSMUSG00000021262	14	ensembl	Evl	protein_coding	Cluster0002
Fam111a:ENSMUSG00000024691	ENSMUSG00000024691	13	ensembl_havana	Fam111a	protein_coding	Cluster0002
Fam167a:ENSMUSG00000035095	ENSMUSG00000035095	11	ensembl_havana	Fam167a	protein_coding	Cluster0002
Fam43a:ENSMUSG00000046546	ENSMUSG00000046546	3	ensembl_havana	Fam43a	protein_coding	Cluster0002
Fam65b:ENSMUSG00000036006	ENSMUSG00000036006	19	ensembl_havana	Fam65b	protein_coding	Cluster0002
Fcer2a:ENSMUSG00000005540	ENSMUSG00000005540	10	ensembl_havana	Fcer2a	protein_coding	Cluster0002
Fcgr2b:ENSMUSG00000026656	ENSMUSG00000026656	15	ensembl_havana	Fcgr2b	protein_coding	Cluster0002
Fcho1:ENSMUSG00000070000	ENSMUSG00000070000	13	ensembl_havana	Fcho1	protein_coding	Cluster0002
Fcmr:ENSMUSG00000042474	ENSMUSG00000042474	6	ensembl_havana	Fcmr	protein_coding	Cluster0002
Fcrl1:ENSMUSG00000059994	ENSMUSG00000059994	10	ensembl_havana	Fcrl1	protein_coding	Cluster0002
Fcrla:ENSMUSG00000038421	ENSMUSG00000038421	13	ensembl_havana	Fcrla	protein_coding	Cluster0002
Fermt3:ENSMUSG00000024965	ENSMUSG00000024965	8	ensembl	Fermt3	protein_coding	Cluster0002
Ffar1:ENSMUSG00000044453	ENSMUSG00000044453	5	ensembl_havana	Ffar1	protein_coding	Cluster0002
Fgd3:ENSMUSG00000037946	ENSMUSG00000037946	11	ensembl_havana	Fgd3	protein_coding	Cluster0002
Fli1:ENSMUSG00000016087	ENSMUSG00000016087	13	ensembl_havana	Fli1	protein_coding	Cluster0002
Fmnl1:ENSMUSG00000055805	ENSMUSG00000055805	14	ensembl_havana	Fmnl1	protein_coding	Cluster0002
Fmnl3:ENSMUSG00000023008	ENSMUSG00000023008	18	ensembl_havana	Fmnl3	protein_coding	Cluster0002
Fndc5:ENSMUSG00000001334	ENSMUSG00000001334	9	ensembl_havana	Fndc5	protein_coding	Cluster0002
Fndc7:ENSMUSG00000045326	ENSMUSG00000045326	13	ensembl_havana	Fndc7	protein_coding	Cluster0002
Foxo1:ENSMUSG00000044167	ENSMUSG00000044167	6	ensembl_havana	Foxo1	protein_coding	Cluster0002
Fscn1:ENSMUSG00000029581	ENSMUSG00000029581	14	ensembl_havana	Fscn1	protein_coding	Cluster0002
Gatm:ENSMUSG00000027199	ENSMUSG00000027199	14	ensembl_havana	Gatm	protein_coding	Cluster0002
Gbp9:ENSMUSG00000029298	ENSMUSG00000029298	15	ensembl_havana	Gbp9	protein_coding	Cluster0002
Gdf11:ENSMUSG00000025352	ENSMUSG00000025352	6	ensembl_havana	Gdf11	protein_coding	Cluster0002
Gga2:ENSMUSG00000030872	ENSMUSG00000030872	14	ensembl_havana	Gga2	protein_coding	Cluster0002
Gimap1:ENSMUSG00000090019	ENSMUSG00000090019	5	ensembl_havana	Gimap1	protein_coding	Cluster0002
Gimap3:ENSMUSG00000039264	ENSMUSG00000039264	9	ensembl_havana	Gimap3	protein_coding	Cluster0002
Gimap4:ENSMUSG00000054435	ENSMUSG00000054435	16	ensembl_havana	Gimap4	protein_coding	Cluster0002
Gimap5:ENSMUSG00000043505	ENSMUSG00000043505	8	ensembl_havana	Gimap5	protein_coding	Cluster0002
Gimap6:ENSMUSG00000047867	ENSMUSG00000047867	11	ensembl_havana	Gimap6	protein_coding	Cluster0002
Gimap7:ENSMUSG00000043931	ENSMUSG00000043931	10	ensembl_havana	Gimap7	protein_coding	Cluster0002
Gimap8:ENSMUSG00000064262	ENSMUSG00000064262	7	ensembl_havana	Gimap8	protein_coding	Cluster0002
Gm11588:ENSMUSG00000086408	ENSMUSG00000086408	1	havana	Gm11588	lincRNA	Cluster0002
Gm11998:ENSMUSG00000087452	ENSMUSG00000087452	1	havana	Gm11998	antisense	Cluster0002
Gm12066:ENSMUSG00000085579	ENSMUSG00000085579	1	havana	Gm12066	lincRNA	Cluster0002
Gm13012:ENSMUSG00000085823	ENSMUSG00000085823	7	havana	Gm13012	antisense	Cluster0002
Gm15232:ENSMUSG00000084806	ENSMUSG00000084806	1	havana	Gm15232	lincRNA	Cluster0002
Gm15987:ENSMUSG00000085786	ENSMUSG00000085786	1	havana	Gm15987	antisense	Cluster0002
Gm16341:ENSMUSG00000087538	ENSMUSG00000087538	1	havana	Gm16341	antisense	Cluster0002
Gm16565:ENSMUSG00000089829	ENSMUSG00000089829	2	havana	Gm16565	processed_transcript	Cluster0002
Gm18342:ENSMUSG00000101279	ENSMUSG00000101279	1	havana	Gm18342	unprocessed_pseudogene	Cluster0002
Gm1966:ENSMUSG00000073902	ENSMUSG00000073902	5	havana	Gm1966	unprocessed_pseudogene	Cluster0002
Gm20506:ENSMUSG00000092222	ENSMUSG00000092222	1	havana	Gm20506	lincRNA	Cluster0002
Gm21975:ENSMUSG00000070354	ENSMUSG00000070354	13	ensembl_havana	Gm21975	protein_coding	Cluster0002
Gm2447:ENSMUSG00000102785	ENSMUSG00000102785	5	havana	Gm2447	lincRNA	Cluster0002
Gm26740:ENSMUSG00000097705	ENSMUSG00000097705	1	havana	Gm26740	antisense	Cluster0002
Gm28417:ENSMUSG00000100280	ENSMUSG00000100280	2	havana	Gm28417	processed_transcript	Cluster0002
Gm37065:ENSMUSG00000104413	ENSMUSG00000104413	1	havana	Gm37065	antisense	Cluster0002
Gm42835:ENSMUSG00000104554	ENSMUSG00000104554	1	havana	Gm42835	antisense	Cluster0002
Gm42870:ENSMUSG00000105128	ENSMUSG00000105128	1	havana	Gm42870	TEC	Cluster0002
Gm43291:ENSMUSG00000105646	ENSMUSG00000105646	1	havana	Gm43291	lincRNA	Cluster0002
Gm43388:ENSMUSG00000104927	ENSMUSG00000104927	1	havana	Gm43388	lincRNA	Cluster0002
Gm4955:ENSMUSG00000037849	ENSMUSG00000037849	7	ensembl_havana	Gm4955	protein_coding	Cluster0002
Gm8369:ENSMUSG00000058470	ENSMUSG00000058470	10	ensembl_havana	Gm8369	protein_coding	Cluster0002
Gm9025:ENSMUSG00000082433	ENSMUSG00000082433	2	havana	Gm9025	processed_pseudogene	Cluster0002
Gpr132:ENSMUSG00000021298	ENSMUSG00000021298	7	ensembl	Gpr132	protein_coding	Cluster0002
Gpr174:ENSMUSG00000073008	ENSMUSG00000073008	11	ensembl_havana	Gpr174	protein_coding	Cluster0002
Gpr18:ENSMUSG00000050350	ENSMUSG00000050350	7	ensembl	Gpr18	protein_coding	Cluster0002
Gpr183:ENSMUSG00000051212	ENSMUSG00000051212	7	ensembl	Gpr183	protein_coding	Cluster0002
Gpsm3:ENSMUSG00000034786	ENSMUSG00000034786	17	ensembl_havana	Gpsm3	protein_coding	Cluster0002
Grap:ENSMUSG00000004837	ENSMUSG00000004837	2	ensembl_havana	Grap	protein_coding	Cluster0002
Grk6:ENSMUSG00000074886	ENSMUSG00000074886	10	ensembl	Grk6	protein_coding	Cluster0002
Grm6:ENSMUSG00000000617	ENSMUSG00000000617	14	ensembl_havana	Grm6	protein_coding	Cluster0002
H2-DMb2:ENSMUSG00000037548	ENSMUSG00000037548	14	ensembl_havana	H2-DMb2	protein_coding	Cluster0002
H2-Eb2:ENSMUSG00000067341	ENSMUSG00000067341	5	ensembl_havana	H2-Eb2	protein_coding	Cluster0002
H2-Oa:ENSMUSG00000024334	ENSMUSG00000024334	8	ensembl_havana	H2-Oa	protein_coding	Cluster0002
H2-Ob:ENSMUSG00000041538	ENSMUSG00000041538	15	ensembl_havana	H2-Ob	protein_coding	Cluster0002
Haao:ENSMUSG00000000673	ENSMUSG00000000673	8	ensembl	Haao	protein_coding	Cluster0002
Havcr1:ENSMUSG00000040405	ENSMUSG00000040405	13	ensembl_havana	Havcr1	protein_coding	Cluster0002
Hcls1:ENSMUSG00000022831	ENSMUSG00000022831	14	ensembl_havana	Hcls1	protein_coding	Cluster0002
Hcn3:ENSMUSG00000028051	ENSMUSG00000028051	10	ensembl_havana	Hcn3	protein_coding	Cluster0002
Hhex:ENSMUSG00000024986	ENSMUSG00000024986	11	ensembl_havana	Hhex	protein_coding	Cluster0002
Hivep3:ENSMUSG00000028634	ENSMUSG00000028634	16	ensembl_havana	Hivep3	protein_coding	Cluster0002
Hmgb1-ps8:ENSMUSG00000097295	ENSMUSG00000097295	1	havana	Hmgb1-ps8	processed_pseudogene	Cluster0002
Hmha1:ENSMUSG00000035697	ENSMUSG00000035697	14	ensembl_havana	Hmha1	protein_coding	Cluster0002
Hnrnpa1:ENSMUSG00000046434	ENSMUSG00000046434	15	ensembl	Hnrnpa1	protein_coding	Cluster0002
Hrh2:ENSMUSG00000034987	ENSMUSG00000034987	3	ensembl_havana	Hrh2	protein_coding	Cluster0002
Hvcn1:ENSMUSG00000064267	ENSMUSG00000064267	13	ensembl_havana	Hvcn1	protein_coding	Cluster0002
Icos:ENSMUSG00000026009	ENSMUSG00000026009	14	ensembl_havana	Icos	protein_coding	Cluster0002
Ifi203:ENSMUSG00000039997	ENSMUSG00000039997	16	ensembl_havana	Ifi203	protein_coding	Cluster0002
Ighd:ENSMUSG00000104213	ENSMUSG00000104213	5	havana	Ighd	IG_C_gene	Cluster0002
Ighg3:ENSMUSG00000076615	ENSMUSG00000076615	3	ensembl_havana	Ighg3	IG_C_gene	Cluster0002
Ighm:ENSMUSG00000076617	ENSMUSG00000076617	9	ensembl_havana	Ighm	IG_C_gene	Cluster0002
Ighv6-6:ENSMUSG00000076680	ENSMUSG00000076680	1	ensembl_havana	Ighv6-6	IG_V_gene	Cluster0002
Iglj3:ENSMUSG00000105231	ENSMUSG00000105231	1	havana	Iglj3	IG_J_gene	Cluster0002
Ikzf1:ENSMUSG00000018654	ENSMUSG00000018654	17	ensembl_havana	Ikzf1	protein_coding	Cluster0002
Ikzf3:ENSMUSG00000018168	ENSMUSG00000018168	8	ensembl_havana	Ikzf3	protein_coding	Cluster0002
Il12a:ENSMUSG00000027776	ENSMUSG00000027776	12	ensembl_havana	Il12a	protein_coding	Cluster0002
Il16:ENSMUSG00000001741	ENSMUSG00000001741	12	ensembl_havana	Il16	protein_coding	Cluster0002
Il21:ENSMUSG00000027718	ENSMUSG00000027718	8	ensembl_havana	Il21	protein_coding	Cluster0002
Il21r:ENSMUSG00000030745	ENSMUSG00000030745	9	ensembl_havana	Il21r	protein_coding	Cluster0002
Il2rg:ENSMUSG00000031304	ENSMUSG00000031304	18	ensembl_havana	Il2rg	protein_coding	Cluster0002
Il5ra:ENSMUSG00000005364	ENSMUSG00000005364	11	ensembl_havana	Il5ra	protein_coding	Cluster0002
Inpp4b:ENSMUSG00000037940	ENSMUSG00000037940	15	ensembl_havana	Inpp4b	protein_coding	Cluster0002
Inpp5d:ENSMUSG00000026288	ENSMUSG00000026288	14	ensembl_havana	Inpp5d	protein_coding	Cluster0002
Ipcef1:ENSMUSG00000064065	ENSMUSG00000064065	15	ensembl_havana	Ipcef1	protein_coding	Cluster0002
Irak3:ENSMUSG00000020227	ENSMUSG00000020227	10	ensembl_havana	Irak3	protein_coding	Cluster0002
Irf4:ENSMUSG00000021356	ENSMUSG00000021356	9	ensembl_havana	Irf4	protein_coding	Cluster0002
Irf5:ENSMUSG00000029771	ENSMUSG00000029771	12	ensembl_havana	Irf5	protein_coding	Cluster0002
Irgc1:ENSMUSG00000062028	ENSMUSG00000062028	8	ensembl_havana	Irgc1	protein_coding	Cluster0002
Itga4:ENSMUSG00000027009	ENSMUSG00000027009	18	ensembl_havana	Itga4	protein_coding	Cluster0002
Itgal:ENSMUSG00000030830	ENSMUSG00000030830	18	ensembl_havana	Itgal	protein_coding	Cluster0002
Itgb2:ENSMUSG00000000290	ENSMUSG00000000290	13	ensembl_havana	Itgb2	protein_coding	Cluster0002
Izumo1r:ENSMUSG00000031933	ENSMUSG00000031933	17	ensembl_havana	Izumo1r	protein_coding	Cluster0002
Jade2:ENSMUSG00000020387	ENSMUSG00000020387	15	ensembl_havana	Jade2	protein_coding	Cluster0002
Kcnab2:ENSMUSG00000028931	ENSMUSG00000028931	11	ensembl_havana	Kcnab2	protein_coding	Cluster0002
Kcng4:ENSMUSG00000045246	ENSMUSG00000045246	11	ensembl_havana	Kcng4	protein_coding	Cluster0002
Klhl14:ENSMUSG00000042514	ENSMUSG00000042514	11	ensembl_havana	Klhl14	protein_coding	Cluster0002
Klhl6:ENSMUSG00000043008	ENSMUSG00000043008	8	ensembl_havana	Klhl6	protein_coding	Cluster0002
Kmo:ENSMUSG00000039783	ENSMUSG00000039783	15	ensembl_havana	Kmo	protein_coding	Cluster0002
Kynu:ENSMUSG00000026866	ENSMUSG00000026866	16	ensembl_havana	Kynu	protein_coding	Cluster0002
Laptm5:ENSMUSG00000028581	ENSMUSG00000028581	17	ensembl_havana	Laptm5	protein_coding	Cluster0002
Lat2:ENSMUSG00000040751	ENSMUSG00000040751	12	ensembl_havana	Lat2	protein_coding	Cluster0002
Lax1:ENSMUSG00000051998	ENSMUSG00000051998	14	ensembl_havana	Lax1	protein_coding	Cluster0002
Lbh:ENSMUSG00000024063	ENSMUSG00000024063	12	ensembl_havana	Lbh	protein_coding	Cluster0002
Lcp1:ENSMUSG00000021998	ENSMUSG00000021998	16	ensembl_havana	Lcp1	protein_coding	Cluster0002
Limd2:ENSMUSG00000040699	ENSMUSG00000040699	13	ensembl_havana	Limd2	protein_coding	Cluster0002
Limk1:ENSMUSG00000029674	ENSMUSG00000029674	13	ensembl_havana	Limk1	protein_coding	Cluster0002
Lipc:ENSMUSG00000032207	ENSMUSG00000032207	9	ensembl	Lipc	protein_coding	Cluster0002
Lmo2:ENSMUSG00000032698	ENSMUSG00000032698	15	ensembl_havana	Lmo2	protein_coding	Cluster0002
Lpxn:ENSMUSG00000024696	ENSMUSG00000024696	8	ensembl	Lpxn	protein_coding	Cluster0002
Lrmp:ENSMUSG00000030263	ENSMUSG00000030263	13	ensembl_havana	Lrmp	protein_coding	Cluster0002
Lrrk2:ENSMUSG00000036273	ENSMUSG00000036273	15	ensembl_havana	Lrrk2	protein_coding	Cluster0002
Lsp1:ENSMUSG00000018819	ENSMUSG00000018819	10	ensembl_havana	Lsp1	protein_coding	Cluster0002
Lta:ENSMUSG00000024402	ENSMUSG00000024402	5	ensembl_havana	Lta	protein_coding	Cluster0002
Ltb:ENSMUSG00000024399	ENSMUSG00000024399	5	ensembl_havana	Ltb	protein_coding	Cluster0002
Ly86:ENSMUSG00000021423	ENSMUSG00000021423	5	ensembl	Ly86	protein_coding	Cluster0002
Ly9:ENSMUSG00000004707	ENSMUSG00000004707	14	ensembl_havana	Ly9	protein_coding	Cluster0002
Lyl1:ENSMUSG00000034041	ENSMUSG00000034041	4	ensembl	Lyl1	protein_coding	Cluster0002
Malt1:ENSMUSG00000032688	ENSMUSG00000032688	7	ensembl_havana	Malt1	protein_coding	Cluster0002
Map3k19:ENSMUSG00000051590	ENSMUSG00000051590	9	ensembl_havana	Map3k19	protein_coding	Cluster0002
Map4k1:ENSMUSG00000037337	ENSMUSG00000037337	11	ensembl_havana	Map4k1	protein_coding	Cluster0002
Mapk11:ENSMUSG00000053137	ENSMUSG00000053137	6	ensembl	Mapk11	protein_coding	Cluster0002
Mbd4:ENSMUSG00000030322	ENSMUSG00000030322	12	ensembl_havana	Mbd4	protein_coding	Cluster0002
Mcm3:ENSMUSG00000041859	ENSMUSG00000041859	10	ensembl_havana	Mcm3	protein_coding	Cluster0002
Mef2c:ENSMUSG00000005583	ENSMUSG00000005583	16	ensembl_havana	Mef2c	protein_coding	Cluster0002
Mfge8:ENSMUSG00000030605	ENSMUSG00000030605	15	ensembl_havana	Mfge8	protein_coding	Cluster0002
Mfng:ENSMUSG00000018169	ENSMUSG00000018169	12	ensembl_havana	Mfng	protein_coding	Cluster0002
Mif:ENSMUSG00000033307	ENSMUSG00000033307	6	ensembl	Mif	protein_coding	Cluster0002
Mndal:ENSMUSG00000090272	ENSMUSG00000090272	7	ensembl_havana	Mndal	protein_coding	Cluster0002
Mob3a:ENSMUSG00000003348	ENSMUSG00000003348	9	ensembl	Mob3a	protein_coding	Cluster0002
Ms4a1:ENSMUSG00000024673	ENSMUSG00000024673	9	ensembl_havana	Ms4a1	protein_coding	Cluster0002
Ms4a4c:ENSMUSG00000024675	ENSMUSG00000024675	19	ensembl_havana	Ms4a4c	protein_coding	Cluster0002
Msn:ENSMUSG00000031207	ENSMUSG00000031207	16	ensembl_havana	Msn	protein_coding	Cluster0002
Mthfd1l:ENSMUSG00000040675	ENSMUSG00000040675	17	ensembl_havana	Mthfd1l	protein_coding	Cluster0002
Mycbp2:ENSMUSG00000033004	ENSMUSG00000033004	14	ensembl_havana	Mycbp2	protein_coding	Cluster0002
Myo1g:ENSMUSG00000020437	ENSMUSG00000020437	12	ensembl_havana	Myo1g	protein_coding	Cluster0002
N4bp3:ENSMUSG00000001053	ENSMUSG00000001053	15	ensembl_havana	N4bp3	protein_coding	Cluster0002
Napsa:ENSMUSG00000002204	ENSMUSG00000002204	9	ensembl_havana	Napsa	protein_coding	Cluster0002
Nckap1l:ENSMUSG00000022488	ENSMUSG00000022488	8	ensembl	Nckap1l	protein_coding	Cluster0002
Nfam1:ENSMUSG00000058099	ENSMUSG00000058099	15	ensembl_havana	Nfam1	protein_coding	Cluster0002
Nfatc1:ENSMUSG00000033016	ENSMUSG00000033016	15	ensembl	Nfatc1	protein_coding	Cluster0002
Nfatc2:ENSMUSG00000027544	ENSMUSG00000027544	16	ensembl_havana	Nfatc2	protein_coding	Cluster0002
Nfkbid:ENSMUSG00000036931	ENSMUSG00000036931	14	ensembl_havana	Nfkbid	protein_coding	Cluster0002
Nrm:ENSMUSG00000059791	ENSMUSG00000059791	14	ensembl_havana	Nrm	protein_coding	Cluster0002
Nrros:ENSMUSG00000052384	ENSMUSG00000052384	13	ensembl_havana	Nrros	protein_coding	Cluster0002
Nup210:ENSMUSG00000030091	ENSMUSG00000030091	17	ensembl_havana	Nup210	protein_coding	Cluster0002
Nxpe2:ENSMUSG00000032028	ENSMUSG00000032028	15	ensembl_havana	Nxpe2	protein_coding	Cluster0002
Nxpe3:ENSMUSG00000075033	ENSMUSG00000075033	3	ensembl	Nxpe3	protein_coding	Cluster0002
Osm:ENSMUSG00000058755	ENSMUSG00000058755	3	ensembl_havana	Osm	protein_coding	Cluster0002
Otulin:ENSMUSG00000046034	ENSMUSG00000046034	7	ensembl	Otulin	protein_coding	Cluster0002
P2ry10:ENSMUSG00000050921	ENSMUSG00000050921	12	ensembl_havana	P2ry10	protein_coding	Cluster0002
Pacs1:ENSMUSG00000024855	ENSMUSG00000024855	9	ensembl	Pacs1	protein_coding	Cluster0002
Pacsin1:ENSMUSG00000040276	ENSMUSG00000040276	14	ensembl_havana	Pacsin1	protein_coding	Cluster0002
Parp1:ENSMUSG00000026496	ENSMUSG00000026496	11	ensembl_havana	Parp1	protein_coding	Cluster0002
Parp8:ENSMUSG00000021725	ENSMUSG00000021725	8	ensembl	Parp8	protein_coding	Cluster0002
Parvg:ENSMUSG00000022439	ENSMUSG00000022439	9	ensembl_havana	Parvg	protein_coding	Cluster0002
Pax5:ENSMUSG00000014030	ENSMUSG00000014030	15	ensembl_havana	Pax5	protein_coding	Cluster0002
Pced1b:ENSMUSG00000044250	ENSMUSG00000044250	7	ensembl	Pced1b	protein_coding	Cluster0002
Pdcd1:ENSMUSG00000026285	ENSMUSG00000026285	7	ensembl_havana	Pdcd1	protein_coding	Cluster0002
Pde4a:ENSMUSG00000032177	ENSMUSG00000032177	16	ensembl_havana	Pde4a	protein_coding	Cluster0002
Pde7a:ENSMUSG00000069094	ENSMUSG00000069094	12	ensembl_havana	Pde7a	protein_coding	Cluster0002
Phf11a:ENSMUSG00000044703	ENSMUSG00000044703	5	ensembl_havana	Phf11a	protein_coding	Cluster0002
Phf11b:ENSMUSG00000091649	ENSMUSG00000091649	3	ensembl_havana	Phf11b	protein_coding	Cluster0002
Phf19:ENSMUSG00000026873	ENSMUSG00000026873	9	ensembl_havana	Phf19	protein_coding	Cluster0002
Phgdh:ENSMUSG00000053398	ENSMUSG00000053398	11	ensembl_havana	Phgdh	protein_coding	Cluster0002
Pik3cd:ENSMUSG00000039936	ENSMUSG00000039936	18	ensembl_havana	Pik3cd	protein_coding	Cluster0002
Pik3cg:ENSMUSG00000020573	ENSMUSG00000020573	16	ensembl_havana	Pik3cg	protein_coding	Cluster0002
Pik3r6:ENSMUSG00000046207	ENSMUSG00000046207	14	ensembl_havana	Pik3r6	protein_coding	Cluster0002
Pim2:ENSMUSG00000031155	ENSMUSG00000031155	14	ensembl_havana	Pim2	protein_coding	Cluster0002
Platr17:ENSMUSG00000092349	ENSMUSG00000092349	1	havana	Platr17	lincRNA	Cluster0002
Plcb2:ENSMUSG00000040061	ENSMUSG00000040061	17	ensembl_havana	Plcb2	protein_coding	Cluster0002
Pld3:ENSMUSG00000003363	ENSMUSG00000003363	15	ensembl_havana	Pld3	protein_coding	Cluster0002
Pld4:ENSMUSG00000052160	ENSMUSG00000052160	6	ensembl	Pld4	protein_coding	Cluster0002
Plek:ENSMUSG00000020120	ENSMUSG00000020120	15	ensembl_havana	Plek	protein_coding	Cluster0002
Plxnc1:ENSMUSG00000074785	ENSMUSG00000074785	4	ensembl_havana	Plxnc1	protein_coding	Cluster0002
Plxnd1:ENSMUSG00000030123	ENSMUSG00000030123	15	ensembl_havana	Plxnd1	protein_coding	Cluster0002
Pou2af1:ENSMUSG00000032053	ENSMUSG00000032053	7	ensembl	Pou2af1	protein_coding	Cluster0002
Pou2f2:ENSMUSG00000008496	ENSMUSG00000008496	18	ensembl_havana	Pou2f2	protein_coding	Cluster0002
Ppm1m:ENSMUSG00000020253	ENSMUSG00000020253	14	ensembl_havana	Ppm1m	protein_coding	Cluster0002
Ppp1r16b:ENSMUSG00000037754	ENSMUSG00000037754	13	ensembl_havana	Ppp1r16b	protein_coding	Cluster0002
Ppp1r18:ENSMUSG00000034595	ENSMUSG00000034595	17	ensembl_havana	Ppp1r18	protein_coding	Cluster0002
Prex1:ENSMUSG00000039621	ENSMUSG00000039621	13	ensembl_havana	Prex1	protein_coding	Cluster0002
Prkcb:ENSMUSG00000052889	ENSMUSG00000052889	11	ensembl_havana	Prkcb	protein_coding	Cluster0002
Ptp4a3:ENSMUSG00000059895	ENSMUSG00000059895	12	ensembl	Ptp4a3	protein_coding	Cluster0002
Ptpn1:ENSMUSG00000027540	ENSMUSG00000027540	13	ensembl_havana	Ptpn1	protein_coding	Cluster0002
Ptpn6:ENSMUSG00000004266	ENSMUSG00000004266	15	ensembl_havana	Ptpn6	protein_coding	Cluster0002
Ptpn7:ENSMUSG00000031506	ENSMUSG00000031506	11	ensembl_havana	Ptpn7	protein_coding	Cluster0002
Ptprc:ENSMUSG00000026395	ENSMUSG00000026395	16	ensembl_havana	Ptprc	protein_coding	Cluster0002
Ptprcap:ENSMUSG00000045826	ENSMUSG00000045826	8	ensembl_havana	Ptprcap	protein_coding	Cluster0002
Pydc3:ENSMUSG00000066677	ENSMUSG00000066677	11	ensembl_havana	Pydc3	protein_coding	Cluster0002
Pydc4:ENSMUSG00000073491	ENSMUSG00000073491	10	ensembl_havana	Pydc4	protein_coding	Cluster0002
Pyhin1:ENSMUSG00000043263	ENSMUSG00000043263	13	ensembl_havana	Pyhin1	protein_coding	Cluster0002
Raet1d:ENSMUSG00000078452	ENSMUSG00000078452	10	ensembl_havana	Raet1d	protein_coding	Cluster0002
Rasal3:ENSMUSG00000052142	ENSMUSG00000052142	15	ensembl_havana	Rasal3	protein_coding	Cluster0002
Rasgrp1:ENSMUSG00000027347	ENSMUSG00000027347	18	ensembl_havana	Rasgrp1	protein_coding	Cluster0002
Rasgrp3:ENSMUSG00000071042	ENSMUSG00000071042	11	ensembl	Rasgrp3	protein_coding	Cluster0002
Rassf2:ENSMUSG00000027339	ENSMUSG00000027339	15	ensembl_havana	Rassf2	protein_coding	Cluster0002
Rassf5:ENSMUSG00000026430	ENSMUSG00000026430	15	ensembl_havana	Rassf5	protein_coding	Cluster0002
Rbm38:ENSMUSG00000027510	ENSMUSG00000027510	17	ensembl_havana	Rbm38	protein_coding	Cluster0002
Rcsd1:ENSMUSG00000040723	ENSMUSG00000040723	14	ensembl_havana	Rcsd1	protein_coding	Cluster0002
Rel:ENSMUSG00000020275	ENSMUSG00000020275	9	ensembl_havana	Rel	protein_coding	Cluster0002
Rest:ENSMUSG00000029249	ENSMUSG00000029249	15	ensembl_havana	Rest	protein_coding	Cluster0002
Rftn1:ENSMUSG00000039316	ENSMUSG00000039316	14	ensembl_havana	Rftn1	protein_coding	Cluster0002
Rgs14:ENSMUSG00000052087	ENSMUSG00000052087	13	ensembl_havana	Rgs14	protein_coding	Cluster0002
Rgs18:ENSMUSG00000026357	ENSMUSG00000026357	3	ensembl_havana	Rgs18	protein_coding	Cluster0002
Rgs19:ENSMUSG00000002458	ENSMUSG00000002458	13	ensembl_havana	Rgs19	protein_coding	Cluster0002
Rhoh:ENSMUSG00000029204	ENSMUSG00000029204	7	ensembl_havana	Rhoh	protein_coding	Cluster0002
Rinl:ENSMUSG00000051735	ENSMUSG00000051735	7	ensembl_havana	Rinl	protein_coding	Cluster0002
Rltpr:ENSMUSG00000050357	ENSMUSG00000050357	8	ensembl	Rltpr	protein_coding	Cluster0002
Rnase6:ENSMUSG00000021880	ENSMUSG00000021880	6	ensembl	Rnase6	protein_coding	Cluster0002
Rnf157:ENSMUSG00000052949	ENSMUSG00000052949	14	ensembl_havana	Rnf157	protein_coding	Cluster0002
Rogdi:ENSMUSG00000022540	ENSMUSG00000022540	16	ensembl_havana	Rogdi	protein_coding	Cluster0002
RP24-67F19.6:ENSMUSG00000108732	ENSMUSG00000108732	1	havana	RP24-67F19.6	TEC	Cluster0002
Rpa1:ENSMUSG00000000751	ENSMUSG00000000751	13	ensembl_havana	Rpa1	protein_coding	Cluster0002
Rpgrip1:ENSMUSG00000057132	ENSMUSG00000057132	15	ensembl_havana	Rpgrip1	protein_coding	Cluster0002
Rrad:ENSMUSG00000031880	ENSMUSG00000031880	6	ensembl	Rrad	protein_coding	Cluster0002
Ryr1:ENSMUSG00000030592	ENSMUSG00000030592	17	ensembl_havana	Ryr1	protein_coding	Cluster0002
S1pr1:ENSMUSG00000045092	ENSMUSG00000045092	8	ensembl_havana	S1pr1	protein_coding	Cluster0002
S1pr4:ENSMUSG00000044199	ENSMUSG00000044199	5	ensembl	S1pr4	protein_coding	Cluster0002
Samsn1:ENSMUSG00000022876	ENSMUSG00000022876	17	ensembl_havana	Samsn1	protein_coding	Cluster0002
Sash3:ENSMUSG00000031101	ENSMUSG00000031101	6	ensembl_havana	Sash3	protein_coding	Cluster0002
Scimp:ENSMUSG00000057135	ENSMUSG00000057135	12	ensembl_havana	Scimp	protein_coding	Cluster0002
Scn4a:ENSMUSG00000001027	ENSMUSG00000001027	7	ensembl_havana	Scn4a	protein_coding	Cluster0002
Sell:ENSMUSG00000026581	ENSMUSG00000026581	14	ensembl_havana	Sell	protein_coding	Cluster0002
Sema4d:ENSMUSG00000021451	ENSMUSG00000021451	15	ensembl_havana	Sema4d	protein_coding	Cluster0002
Sesn3:ENSMUSG00000032009	ENSMUSG00000032009	8	ensembl_havana	Sesn3	protein_coding	Cluster0002
Sh2d1a:ENSMUSG00000005696	ENSMUSG00000005696	11	ensembl_havana	Sh2d1a	protein_coding	Cluster0002
Sh2d3c:ENSMUSG00000059013	ENSMUSG00000059013	12	ensembl_havana	Sh2d3c	protein_coding	Cluster0002
Sh3bgrl3:ENSMUSG00000028843	ENSMUSG00000028843	8	ensembl_havana	Sh3bgrl3	protein_coding	Cluster0002
Sh3kbp1:ENSMUSG00000040990	ENSMUSG00000040990	17	ensembl_havana	Sh3kbp1	protein_coding	Cluster0002
Shisa8:ENSMUSG00000096883	ENSMUSG00000096883	1	ensembl	Shisa8	protein_coding	Cluster0002
Siglecg:ENSMUSG00000030468	ENSMUSG00000030468	12	ensembl_havana	Siglecg	protein_coding	Cluster0002
Sipa1:ENSMUSG00000056917	ENSMUSG00000056917	12	ensembl	Sipa1	protein_coding	Cluster0002
Sla:ENSMUSG00000022372	ENSMUSG00000022372	14	ensembl_havana	Sla	protein_coding	Cluster0002
Slain1:ENSMUSG00000055717	ENSMUSG00000055717	13	ensembl_havana	Slain1	protein_coding	Cluster0002
Slamf1:ENSMUSG00000015316	ENSMUSG00000015316	11	ensembl_havana	Slamf1	protein_coding	Cluster0002
Slamf6:ENSMUSG00000015314	ENSMUSG00000015314	10	ensembl_havana	Slamf6	protein_coding	Cluster0002
Slc15a4:ENSMUSG00000029416	ENSMUSG00000029416	17	ensembl_havana	Slc15a4	protein_coding	Cluster0002
Slc1a2:ENSMUSG00000005089	ENSMUSG00000005089	15	ensembl_havana	Slc1a2	protein_coding	Cluster0002
Slc25a19:ENSMUSG00000020744	ENSMUSG00000020744	13	ensembl_havana	Slc25a19	protein_coding	Cluster0002
Slc2a8:ENSMUSG00000026791	ENSMUSG00000026791	14	ensembl_havana	Slc2a8	protein_coding	Cluster0002
Slc44a2:ENSMUSG00000057193	ENSMUSG00000057193	7	ensembl	Slc44a2	protein_coding	Cluster0002
Slc7a5:ENSMUSG00000040010	ENSMUSG00000040010	10	ensembl_havana	Slc7a5	protein_coding	Cluster0002
Slc9a7:ENSMUSG00000037341	ENSMUSG00000037341	13	ensembl_havana	Slc9a7	protein_coding	Cluster0002
Snn:ENSMUSG00000037972	ENSMUSG00000037972	6	ensembl	Snn	protein_coding	Cluster0002
Snx8:ENSMUSG00000029560	ENSMUSG00000029560	12	ensembl_havana	Snx8	protein_coding	Cluster0002
Sp110:ENSMUSG00000070034	ENSMUSG00000070034	13	ensembl_havana	Sp110	protein_coding	Cluster0002
Spi1:ENSMUSG00000002111	ENSMUSG00000002111	8	ensembl_havana	Spi1	protein_coding	Cluster0002
Srgn:ENSMUSG00000020077	ENSMUSG00000020077	14	ensembl_havana	Srgn	protein_coding	Cluster0002
Srpk3:ENSMUSG00000002007	ENSMUSG00000002007	5	ensembl_havana	Srpk3	protein_coding	Cluster0002
St8sia1:ENSMUSG00000030283	ENSMUSG00000030283	7	ensembl_havana	St8sia1	protein_coding	Cluster0002
St8sia4:ENSMUSG00000040710	ENSMUSG00000040710	10	ensembl_havana	St8sia4	protein_coding	Cluster0002
St8sia6:ENSMUSG00000003418	ENSMUSG00000003418	11	ensembl_havana	St8sia6	protein_coding	Cluster0002
Stap1:ENSMUSG00000029254	ENSMUSG00000029254	16	ensembl_havana	Stap1	protein_coding	Cluster0002
Stat5a:ENSMUSG00000004043	ENSMUSG00000004043	14	ensembl_havana	Stat5a	protein_coding	Cluster0002
Stk26:ENSMUSG00000031112	ENSMUSG00000031112	10	ensembl_havana	Stk26	protein_coding	Cluster0002
Strada:ENSMUSG00000069631	ENSMUSG00000069631	14	ensembl_havana	Strada	protein_coding	Cluster0002
Susd3:ENSMUSG00000021384	ENSMUSG00000021384	14	ensembl_havana	Susd3	protein_coding	Cluster0002
Swap70:ENSMUSG00000031015	ENSMUSG00000031015	7	ensembl	Swap70	protein_coding	Cluster0002
Syk:ENSMUSG00000021457	ENSMUSG00000021457	14	ensembl_havana	Syk	protein_coding	Cluster0002
Tacstd2:ENSMUSG00000051397	ENSMUSG00000051397	5	ensembl_havana	Tacstd2	protein_coding	Cluster0002
Tagap:ENSMUSG00000033450	ENSMUSG00000033450	7	ensembl_havana	Tagap	protein_coding	Cluster0002
Tbc1d10c:ENSMUSG00000040247	ENSMUSG00000040247	5	ensembl	Tbc1d10c	protein_coding	Cluster0002
Tbc1d4:ENSMUSG00000033083	ENSMUSG00000033083	16	ensembl_havana	Tbc1d4	protein_coding	Cluster0002
Tcf7:ENSMUSG00000000782	ENSMUSG00000000782	15	ensembl_havana	Tcf7	protein_coding	Cluster0002
Tespa1:ENSMUSG00000034833	ENSMUSG00000034833	9	ensembl	Tespa1	protein_coding	Cluster0002
Tgfb1:ENSMUSG00000002603	ENSMUSG00000002603	15	ensembl_havana	Tgfb1	protein_coding	Cluster0002
Thada:ENSMUSG00000024251	ENSMUSG00000024251	9	ensembl	Thada	protein_coding	Cluster0002
Them6:ENSMUSG00000056665	ENSMUSG00000056665	2	ensembl_havana	Them6	protein_coding	Cluster0002
Themis2:ENSMUSG00000037731	ENSMUSG00000037731	5	ensembl_havana	Themis2	protein_coding	Cluster0002
Tigit:ENSMUSG00000071552	ENSMUSG00000071552	4	ensembl	Tigit	protein_coding	Cluster0002
Tlr7:ENSMUSG00000044583	ENSMUSG00000044583	13	ensembl_havana	Tlr7	protein_coding	Cluster0002
Tlr9:ENSMUSG00000045322	ENSMUSG00000045322	10	ensembl_havana	Tlr9	protein_coding	Cluster0002
Tmed8:ENSMUSG00000034111	ENSMUSG00000034111	5	ensembl	Tmed8	protein_coding	Cluster0002
Tmem121:ENSMUSG00000049036	ENSMUSG00000049036	7	ensembl_havana	Tmem121	protein_coding	Cluster0002
Tmem123:ENSMUSG00000050912	ENSMUSG00000050912	15	ensembl_havana	Tmem123	protein_coding	Cluster0002
Tmem156:ENSMUSG00000037913	ENSMUSG00000037913	11	ensembl_havana	Tmem156	protein_coding	Cluster0002
Tmem163:ENSMUSG00000026347	ENSMUSG00000026347	13	ensembl_havana	Tmem163	protein_coding	Cluster0002
Tmem173:ENSMUSG00000024349	ENSMUSG00000024349	9	ensembl	Tmem173	protein_coding	Cluster0002
Tmem194b:ENSMUSG00000043015	ENSMUSG00000043015	15	ensembl_havana	Tmem194b	protein_coding	Cluster0002
Tnfaip8:ENSMUSG00000062210	ENSMUSG00000062210	13	ensembl_havana	Tnfaip8	protein_coding	Cluster0002
Tnfrsf13b:ENSMUSG00000010142	ENSMUSG00000010142	12	ensembl_havana	Tnfrsf13b	protein_coding	Cluster0002
Tnfrsf13c:ENSMUSG00000068105	ENSMUSG00000068105	10	ensembl	Tnfrsf13c	protein_coding	Cluster0002
Tnfrsf26:ENSMUSG00000045362	ENSMUSG00000045362	8	ensembl_havana	Tnfrsf26	protein_coding	Cluster0002
Tnfrsf8:ENSMUSG00000028602	ENSMUSG00000028602	12	ensembl_havana	Tnfrsf8	protein_coding	Cluster0002
Tnni2:ENSMUSG00000031097	ENSMUSG00000031097	14	ensembl_havana	Tnni2	protein_coding	Cluster0002
Tox2:ENSMUSG00000074607	ENSMUSG00000074607	11	ensembl_havana	Tox2	protein_coding	Cluster0002
Traf1:ENSMUSG00000026875	ENSMUSG00000026875	14	ensembl_havana	Traf1	protein_coding	Cluster0002
Traf3ip3:ENSMUSG00000037318	ENSMUSG00000037318	10	ensembl_havana	Traf3ip3	protein_coding	Cluster0002
Treml2:ENSMUSG00000071068	ENSMUSG00000071068	6	ensembl	Treml2	protein_coding	Cluster0002
Trerf1:ENSMUSG00000064043	ENSMUSG00000064043	13	ensembl_havana	Trerf1	processed_transcript	Cluster0002
Trex2:ENSMUSG00000031372	ENSMUSG00000031372	7	ensembl_havana	Trex2	protein_coding	Cluster0002
Trib2:ENSMUSG00000020601	ENSMUSG00000020601	7	ensembl_havana	Trib2	protein_coding	Cluster0002
Trim30b:ENSMUSG00000052749	ENSMUSG00000052749	8	ensembl_havana	Trim30b	protein_coding	Cluster0002
Trmt112:ENSMUSG00000038812	ENSMUSG00000038812	16	ensembl_havana	Trmt112	protein_coding	Cluster0002
Tspan32:ENSMUSG00000000244	ENSMUSG00000000244	17	ensembl_havana	Tspan32	protein_coding	Cluster0002
Tspan33:ENSMUSG00000001763	ENSMUSG00000001763	14	ensembl_havana	Tspan33	protein_coding	Cluster0002
Tspyl3:ENSMUSG00000074671	ENSMUSG00000074671	6	ensembl_havana	Tspyl3	protein_coding	Cluster0002
Ttpal:ENSMUSG00000017679	ENSMUSG00000017679	16	ensembl_havana	Ttpal	protein_coding	Cluster0002
Unc93b1:ENSMUSG00000036908	ENSMUSG00000036908	16	ensembl_havana	Unc93b1	protein_coding	Cluster0002
Vav1:ENSMUSG00000034116	ENSMUSG00000034116	17	ensembl_havana	Vav1	protein_coding	Cluster0002
Vcam1:ENSMUSG00000027962	ENSMUSG00000027962	14	ensembl_havana	Vcam1	protein_coding	Cluster0002
Vpreb3:ENSMUSG00000000903	ENSMUSG00000000903	3	ensembl_havana	Vpreb3	protein_coding	Cluster0002
Was:ENSMUSG00000031165	ENSMUSG00000031165	6	ensembl_havana	Was	protein_coding	Cluster0002
Wbscr28:ENSMUSG00000040576	ENSMUSG00000040576	8	ensembl_havana	Wbscr28	protein_coding	Cluster0002
Wdfy4:ENSMUSG00000051506	ENSMUSG00000051506	16	ensembl_havana	Wdfy4	protein_coding	Cluster0002
Wdr91:ENSMUSG00000058486	ENSMUSG00000058486	11	ensembl_havana	Wdr91	protein_coding	Cluster0002
Wipf1:ENSMUSG00000075284	ENSMUSG00000075284	10	ensembl_havana	Wipf1	protein_coding	Cluster0002
Xkrx:ENSMUSG00000031258	ENSMUSG00000031258	4	ensembl_havana	Xkrx	protein_coding	Cluster0002
Zfp296:ENSMUSG00000011267	ENSMUSG00000011267	8	ensembl_havana	Zfp296	protein_coding	Cluster0002
Zfp318:ENSMUSG00000015597	ENSMUSG00000015597	16	ensembl_havana	Zfp318	protein_coding	Cluster0002
Zfp831:ENSMUSG00000050600	ENSMUSG00000050600	5	ensembl_havana	Zfp831	protein_coding	Cluster0002
0610031O16Rik:ENSMUSG00000099146	ENSMUSG00000099146	7	havana	0610031O16Rik	antisense	Cluster0003
1110002J07Rik:ENSMUSG00000097134	ENSMUSG00000097134	1	ensembl	1110002J07Rik	lincRNA	Cluster0003
1190005I06Rik:ENSMUSG00000043687	ENSMUSG00000043687	15	ensembl_havana	1190005I06Rik	protein_coding	Cluster0003
1300017J02Rik:ENSMUSG00000033688	ENSMUSG00000033688	9	ensembl_havana	1300017J02Rik	protein_coding	Cluster0003
1700016F12Rik:ENSMUSG00000104955	ENSMUSG00000104955	1	havana	1700016F12Rik	lincRNA	Cluster0003
1700025G04Rik:ENSMUSG00000032666	ENSMUSG00000032666	16	ensembl_havana	1700025G04Rik	protein_coding	Cluster0003
1700066B19Rik:ENSMUSG00000073598	ENSMUSG00000073598	3	ensembl_havana	1700066B19Rik	protein_coding	Cluster0003
1810064F22Rik:ENSMUSG00000090925	ENSMUSG00000090925	2	ensembl_havana	1810064F22Rik	antisense	Cluster0003
2310043L19Rik:ENSMUSG00000101746	ENSMUSG00000101746	1	havana	2310043L19Rik	lincRNA	Cluster0003
2810468N07Rik:ENSMUSG00000091475	ENSMUSG00000091475	2	havana	2810468N07Rik	processed_transcript	Cluster0003
3110043O21Rik:ENSMUSG00000028300	ENSMUSG00000028300	14	ensembl_havana	3110043O21Rik	protein_coding	Cluster0003
4930402H24Rik:ENSMUSG00000027309	ENSMUSG00000027309	18	ensembl_havana	4930402H24Rik	protein_coding	Cluster0003
4930579G24Rik:ENSMUSG00000027811	ENSMUSG00000027811	9	ensembl_havana	4930579G24Rik	protein_coding	Cluster0003
4933440M02Rik:ENSMUSG00000045928	ENSMUSG00000045928	2	ensembl_havana	4933440M02Rik	lincRNA	Cluster0003
5730419F03Rik:ENSMUSG00000099364	ENSMUSG00000099364	1	havana	5730419F03Rik	lincRNA	Cluster0003
9330159M07Rik:ENSMUSG00000097177	ENSMUSG00000097177	7	havana	9330159M07Rik	processed_transcript	Cluster0003
9430037G07Rik:ENSMUSG00000097073	ENSMUSG00000097073	7	havana	9430037G07Rik	lincRNA	Cluster0003
A730036I17Rik:ENSMUSG00000056738	ENSMUSG00000056738	11	ensembl_havana	A730036I17Rik	lincRNA	Cluster0003
A930024N18Rik:ENSMUSG00000097566	ENSMUSG00000097566	1	ensembl	A930024N18Rik	lincRNA	Cluster0003
Abca13:ENSMUSG00000004668	ENSMUSG00000004668	14	ensembl_havana	Abca13	protein_coding	Cluster0003
Abcc5:ENSMUSG00000022822	ENSMUSG00000022822	15	ensembl_havana	Abcc5	protein_coding	Cluster0003
Abhd16b:ENSMUSG00000055882	ENSMUSG00000055882	8	ensembl_havana	Abhd16b	protein_coding	Cluster0003
AC132444.2:ENSMUSG00000094728	ENSMUSG00000094728	1	ensembl	AC132444.2	protein_coding	Cluster0003
Ackr2:ENSMUSG00000044534	ENSMUSG00000044534	7	ensembl	Ackr2	protein_coding	Cluster0003
Acot5:ENSMUSG00000042540	ENSMUSG00000042540	12	ensembl_havana	Acot5	protein_coding	Cluster0003
Acot6:ENSMUSG00000043487	ENSMUSG00000043487	3	ensembl_havana	Acot6	protein_coding	Cluster0003
Adam3:ENSMUSG00000031553	ENSMUSG00000031553	15	ensembl_havana	Adam3	protein_coding	Cluster0003
Adamts13:ENSMUSG00000014852	ENSMUSG00000014852	16	ensembl_havana	Adamts13	protein_coding	Cluster0003
Adgb:ENSMUSG00000050994	ENSMUSG00000050994	20	ensembl_havana	Adgb	protein_coding	Cluster0003
Adgrb1:ENSMUSG00000034730	ENSMUSG00000034730	16	ensembl_havana	Adgrb1	protein_coding	Cluster0003
Adgrd1:ENSMUSG00000044017	ENSMUSG00000044017	16	ensembl_havana	Adgrd1	protein_coding	Cluster0003
Adgrl2:ENSMUSG00000028184	ENSMUSG00000028184	12	ensembl_havana	Adgrl2	protein_coding	Cluster0003
Adora1:ENSMUSG00000042429	ENSMUSG00000042429	8	ensembl_havana	Adora1	protein_coding	Cluster0003
Aebp2:ENSMUSG00000030232	ENSMUSG00000030232	17	ensembl_havana	Aebp2	protein_coding	Cluster0003
Agps:ENSMUSG00000042410	ENSMUSG00000042410	15	ensembl_havana	Agps	protein_coding	Cluster0003
Ahr:ENSMUSG00000019256	ENSMUSG00000019256	17	ensembl_havana	Ahr	protein_coding	Cluster0003
AI429214:ENSMUSG00000074384	ENSMUSG00000074384	3	ensembl	AI429214	protein_coding	Cluster0003
Aif1l:ENSMUSG00000001864	ENSMUSG00000001864	13	ensembl_havana	Aif1l	protein_coding	Cluster0003
Ajuba:ENSMUSG00000022178	ENSMUSG00000022178	10	ensembl	Ajuba	protein_coding	Cluster0003
Akr1c21:ENSMUSG00000021207	ENSMUSG00000021207	8	ensembl_havana	Akr1c21	protein_coding	Cluster0003
Akt3:ENSMUSG00000019699	ENSMUSG00000019699	15	ensembl_havana	Akt3	protein_coding	Cluster0003
Alox5:ENSMUSG00000025701	ENSMUSG00000025701	12	ensembl_havana	Alox5	protein_coding	Cluster0003
Amigo3:ENSMUSG00000032593	ENSMUSG00000032593	5	ensembl_havana	Amigo3	protein_coding	Cluster0003
Ankrd42:ENSMUSG00000041343	ENSMUSG00000041343	19	ensembl_havana	Ankrd42	protein_coding	Cluster0003
Anxa10:ENSMUSG00000031635	ENSMUSG00000031635	13	ensembl	Anxa10	protein_coding	Cluster0003
Anxa5:ENSMUSG00000027712	ENSMUSG00000027712	13	ensembl_havana	Anxa5	protein_coding	Cluster0003
Apobec2:ENSMUSG00000040694	ENSMUSG00000040694	3	ensembl	Apobec2	protein_coding	Cluster0003
Aqp4:ENSMUSG00000024411	ENSMUSG00000024411	9	ensembl	Aqp4	protein_coding	Cluster0003
Arc:ENSMUSG00000022602	ENSMUSG00000022602	14	ensembl_havana	Arc	protein_coding	Cluster0003
Arhgap8:ENSMUSG00000078954	ENSMUSG00000078954	9	ensembl_havana	Arhgap8	protein_coding	Cluster0003
Arl11:ENSMUSG00000043157	ENSMUSG00000043157	7	ensembl	Arl11	protein_coding	Cluster0003
Arl4c:ENSMUSG00000049866	ENSMUSG00000049866	12	ensembl_havana	Arl4c	protein_coding	Cluster0003
Atrn:ENSMUSG00000027312	ENSMUSG00000027312	14	ensembl_havana	Atrn	protein_coding	Cluster0003
Atxn10:ENSMUSG00000016541	ENSMUSG00000016541	9	ensembl	Atxn10	protein_coding	Cluster0003
AU015836:ENSMUSG00000081044	ENSMUSG00000081044	8	ensembl_havana	AU015836	protein_coding	Cluster0003
Avil:ENSMUSG00000025432	ENSMUSG00000025432	11	ensembl_havana	Avil	protein_coding	Cluster0003
B430306N03Rik:ENSMUSG00000043740	ENSMUSG00000043740	14	ensembl_havana	B430306N03Rik	protein_coding	Cluster0003
BC021614:ENSMUSG00000058216	ENSMUSG00000058216	12	ensembl_havana	BC021614	protein_coding	Cluster0003
BC147527:ENSMUSG00000094796	ENSMUSG00000094796	1	ensembl	BC147527	protein_coding	Cluster0003
Bcl2a1d:ENSMUSG00000099974	ENSMUSG00000099974	1	ensembl_havana	Bcl2a1d	protein_coding	Cluster0003
Bcl2l11:ENSMUSG00000027381	ENSMUSG00000027381	16	ensembl_havana	Bcl2l11	protein_coding	Cluster0003
Bend4:ENSMUSG00000092060	ENSMUSG00000092060	4	ensembl_havana	Bend4	protein_coding	Cluster0003
Bhlhe41:ENSMUSG00000030256	ENSMUSG00000030256	11	ensembl_havana	Bhlhe41	protein_coding	Cluster0003
Blnk:ENSMUSG00000061132	ENSMUSG00000061132	13	ensembl_havana	Blnk	protein_coding	Cluster0003
Bmp2:ENSMUSG00000027358	ENSMUSG00000027358	6	ensembl_havana	Bmp2	protein_coding	Cluster0003
Bmp8b:ENSMUSG00000002384	ENSMUSG00000002384	2	ensembl_havana	Bmp8b	protein_coding	Cluster0003
Bpifb2:ENSMUSG00000027481	ENSMUSG00000027481	2	ensembl_havana	Bpifb2	protein_coding	Cluster0003
Bpifc:ENSMUSG00000050108	ENSMUSG00000050108	12	ensembl_havana	Bpifc	protein_coding	Cluster0003
Bsdc1:ENSMUSG00000040859	ENSMUSG00000040859	14	ensembl_havana	Bsdc1	protein_coding	Cluster0003
Btbd11:ENSMUSG00000020042	ENSMUSG00000020042	15	ensembl_havana	Btbd11	protein_coding	Cluster0003
C1qtnf6:ENSMUSG00000022440	ENSMUSG00000022440	8	ensembl_havana	C1qtnf6	protein_coding	Cluster0003
C4bp:ENSMUSG00000026405	ENSMUSG00000026405	14	ensembl_havana	C4bp	protein_coding	Cluster0003
Calcb:ENSMUSG00000030666	ENSMUSG00000030666	11	ensembl_havana	Calcb	protein_coding	Cluster0003
Camk2a:ENSMUSG00000024617	ENSMUSG00000024617	16	ensembl_havana	Camk2a	protein_coding	Cluster0003
Car8:ENSMUSG00000041261	ENSMUSG00000041261	9	ensembl_havana	Car8	protein_coding	Cluster0003
Ccdc108:ENSMUSG00000047021	ENSMUSG00000047021	14	ensembl_havana	Ccdc108	protein_coding	Cluster0003
Ccdc184:ENSMUSG00000029875	ENSMUSG00000029875	4	ensembl	Ccdc184	protein_coding	Cluster0003
Ccdc33:ENSMUSG00000037716	ENSMUSG00000037716	14	ensembl_havana	Ccdc33	protein_coding	Cluster0003
Ccdc88b:ENSMUSG00000047810	ENSMUSG00000047810	8	ensembl	Ccdc88b	protein_coding	Cluster0003
Ccl2:ENSMUSG00000035385	ENSMUSG00000035385	5	ensembl_havana	Ccl2	protein_coding	Cluster0003
Ccl20:ENSMUSG00000026166	ENSMUSG00000026166	14	ensembl_havana	Ccl20	protein_coding	Cluster0003
Ccl9:ENSMUSG00000019122	ENSMUSG00000019122	8	ensembl_havana	Ccl9	protein_coding	Cluster0003
Ccr3:ENSMUSG00000035448	ENSMUSG00000035448	8	ensembl	Ccr3	protein_coding	Cluster0003
Ccr6:ENSMUSG00000040899	ENSMUSG00000040899	13	ensembl	Ccr6	protein_coding	Cluster0003
Cd24a:ENSMUSG00000047139	ENSMUSG00000047139	8	ensembl	Cd24a	protein_coding	Cluster0003
Cd300lf:ENSMUSG00000047798	ENSMUSG00000047798	15	ensembl_havana	Cd300lf	protein_coding	Cluster0003
Cd55b:ENSMUSG00000026401	ENSMUSG00000026401	15	ensembl_havana	Cd55b	protein_coding	Cluster0003
Cd80:ENSMUSG00000075122	ENSMUSG00000075122	4	ensembl	Cd80	protein_coding	Cluster0003
Celsr1:ENSMUSG00000016028	ENSMUSG00000016028	9	ensembl	Celsr1	protein_coding	Cluster0003
Ces1b:ENSMUSG00000078964	ENSMUSG00000078964	1	ensembl	Ces1b	protein_coding	Cluster0003
Ces2f:ENSMUSG00000062826	ENSMUSG00000062826	6	ensembl	Ces2f	protein_coding	Cluster0003
Ces3a:ENSMUSG00000069922	ENSMUSG00000069922	11	ensembl	Ces3a	protein_coding	Cluster0003
Cfap45:ENSMUSG00000026546	ENSMUSG00000026546	16	ensembl_havana	Cfap45	protein_coding	Cluster0003
Chst8:ENSMUSG00000060402	ENSMUSG00000060402	7	ensembl_havana	Chst8	protein_coding	Cluster0003
Clca3a2:ENSMUSG00000028262	ENSMUSG00000028262	13	ensembl_havana	Clca3a2	protein_coding	Cluster0003
Clca3b:ENSMUSG00000037033	ENSMUSG00000037033	9	ensembl_havana	Clca3b	protein_coding	Cluster0003
Cldn13:ENSMUSG00000008843	ENSMUSG00000008843	4	ensembl_havana	Cldn13	protein_coding	Cluster0003
Clu:ENSMUSG00000022037	ENSMUSG00000022037	14	ensembl_havana	Clu	protein_coding	Cluster0003
Cmtm8:ENSMUSG00000041012	ENSMUSG00000041012	3	ensembl	Cmtm8	protein_coding	Cluster0003
Cpb2:ENSMUSG00000021999	ENSMUSG00000021999	8	ensembl	Cpb2	protein_coding	Cluster0003
Csf2rb:ENSMUSG00000071713	ENSMUSG00000071713	4	ensembl	Csf2rb	protein_coding	Cluster0003
Csgalnact1:ENSMUSG00000036356	ENSMUSG00000036356	14	ensembl_havana	Csgalnact1	protein_coding	Cluster0003
Ctsh:ENSMUSG00000032359	ENSMUSG00000032359	14	ensembl_havana	Ctsh	protein_coding	Cluster0003
Cxcl16:ENSMUSG00000018920	ENSMUSG00000018920	11	ensembl_havana	Cxcl16	protein_coding	Cluster0003
Cxcl2:ENSMUSG00000058427	ENSMUSG00000058427	10	ensembl_havana	Cxcl2	protein_coding	Cluster0003
Cxcl3:ENSMUSG00000029379	ENSMUSG00000029379	10	ensembl_havana	Cxcl3	protein_coding	Cluster0003
Cyp4f39:ENSMUSG00000061126	ENSMUSG00000061126	4	ensembl	Cyp4f39	protein_coding	Cluster0003
D10Wsu102e:ENSMUSG00000020255	ENSMUSG00000020255	7	ensembl	D10Wsu102e	protein_coding	Cluster0003
D630011A20Rik:ENSMUSG00000097421	ENSMUSG00000097421	1	ensembl	D630011A20Rik	protein_coding	Cluster0003
Dapk2:ENSMUSG00000032380	ENSMUSG00000032380	8	ensembl_havana	Dapk2	protein_coding	Cluster0003
Dazl:ENSMUSG00000010592	ENSMUSG00000010592	8	ensembl	Dazl	protein_coding	Cluster0003
Dclk1:ENSMUSG00000027797	ENSMUSG00000027797	15	ensembl_havana	Dclk1	protein_coding	Cluster0003
Ddit4:ENSMUSG00000020108	ENSMUSG00000020108	3	ensembl	Ddit4	protein_coding	Cluster0003
Defb6:ENSMUSG00000050756	ENSMUSG00000050756	3	ensembl_havana	Defb6	protein_coding	Cluster0003
Dnah7b:ENSMUSG00000041144	ENSMUSG00000041144	10	ensembl_havana	Dnah7b	protein_coding	Cluster0003
Dok1:ENSMUSG00000068335	ENSMUSG00000068335	6	ensembl_havana	Dok1	protein_coding	Cluster0003
Dph7:ENSMUSG00000026975	ENSMUSG00000026975	10	ensembl_havana	Dph7	protein_coding	Cluster0003
Dscam:ENSMUSG00000050272	ENSMUSG00000050272	9	ensembl_havana	Dscam	protein_coding	Cluster0003
Dscaml1:ENSMUSG00000032087	ENSMUSG00000032087	9	ensembl	Dscaml1	protein_coding	Cluster0003
Dusp15:ENSMUSG00000042662	ENSMUSG00000042662	16	ensembl_havana	Dusp15	protein_coding	Cluster0003
Dusp4:ENSMUSG00000031530	ENSMUSG00000031530	6	ensembl_havana	Dusp4	protein_coding	Cluster0003
E130012A19Rik:ENSMUSG00000043439	ENSMUSG00000043439	5	ensembl_havana	E130012A19Rik	protein_coding	Cluster0003
[truncated: 6,996 more rows]
