# Supplementary material for: Aging-Related Impairments to M Cells in Peyer’s Patches Coincide With Disturbances to Paneth Cells
Source: Front Immunol. 2021 Dec 6;12:761949. doi: 10.3389/fimmu.2021.761949 (PMC8687451; doi:10.3389/fimmu.2021.761949)
Supplement: Supplementary Table 2 — Enrichment analyses of the genes in clusters 1-50 and 116. Each tab contains details of the significantly over-represented gene ontologies (GO) and significantly enriched TF binding site motifs for the genes in the specified cluster. [file Table_2.xlsx]

## Sheet: C001
source	term_name	term_id	adjusted_p_value	negative_log10_of_adjusted_p_value	term_size	query_size	intersection_size	effective_domain_size	intersections
GO:MF	protein binding	GO:0005515	1.03508e-49	48.985	10266	1307	900	21091	9330182L06RIK,ABCC9,ABCG4,ABLIM2,ABLIM3,ACKR1,ACKR3,ACKR4,ACTA2,ACVRL1,ADAM11,ADAM22,ADAMTS1,ADAMTS4,ADAMTSL4,ADARB1,ADCY1,ADCY5,ADCYAP1,ADCYAP1R1,ADGRA2,ADGRB2,ADGRG6,ADGRL1,ADGRL3,ADRA2C,AEBP1,AFAP1L2,AGTR1A,AHI1,AHRR,AKAP12,AKAP6,ALDH1A3,ALDH7A1,AMIGO1,AMOTL1,ANGPT1,ANGPTL1,ANGPTL2,ANK1,ANK2,ANKRD34A,ANKRD63,ANO2,ANTXR1,ANXA1,AOC3,AOX1,APBA1,APBB1,APC2,APLN,ARHGAP23,ARHGAP44,ARHGAP6,ARHGEF17,A…
GO:MF	extracellular matrix structural constituent	GO:0005201	3.96937e-32	31.4013	133	1307	58	21091	ASPN,BGN,BMPER,COL12A1,COL14A1,COL16A1,COL18A1,COL1A1,COL1A2,COL23A1,COL28A1,COL3A1,COL4A5,COL5A1,COL5A2,COL5A3,COL6A1,COL6A2,COL6A3,COL6A4,COL8A1,COL8A2,DCN,DPT,ECM1,EFEMP1,EFEMP2,EMILIN1,FBLN2,FBLN5,FBN1,FN1,HMCN2,LAMA1,LAMA2,LAMA4,LAMB1,LAMB2,LTBP1,LUM,MFAP4,MMRN2,NID1,NTN1,OGN,PCOLCE2,POSTN,PRELP,PXDN,SCARA3,SLIT2,SPARC,SPOCK2,SPON1,SRPX2,TNC,TNXB,VTN
GO:MF	calcium ion binding	GO:0005509	3.04454e-28	27.5165	717	1307	133	21091	ADGRE1,ADGRL3,ADGRL4,ANXA1,AOAH,AOC3,ASPN,ASTN2,C1RA,C1S1,CACNA1B,CADPS,CALB2,CASQ1,CASQ2,CCBE1,CD248,CD93,CDH11,CDH13,CDH19,CDH2,CDH3,CDH5,CDH6,CLEC3B,CLSTN2,CLSTN3,CRTAC1,DCHS1,DGKB,DHH,DNER,DOC2B,DSC3,DYSF,EDIL3,EFCAB9,EFCC1,EFEMP1,EFEMP2,EGFLAM,EHD2,FAT4,FBLN2,FBLN5,FBLN7,FBN1,FKBP10,FKBP14,FKBP9,FSTL1,FSTL5,HMCN2,HPCA,HPCAL4,KCNIP2,KCNIP4,LOXL2,LTBP1,LTBP3,LTBP4,MICU3,MMRN1,MYL1,MYL9,NCS1,NE…
GO:MF	binding	GO:0005488	3.9076e-27	26.4081	15044	1307	1102	21091	9330182L06RIK,A4GALT,AATK,ABCA8A,ABCA9,ABCC9,ABCG4,ABLIM2,ABLIM3,ACKR1,ACKR3,ACKR4,ACTA2,ACTG2,ACVRL1,ADAM11,ADAM22,ADAMDEC1,ADAMTS1,ADAMTS18,ADAMTS4,ADAMTS7,ADAMTS8,ADAMTSL4,ADARB1,ADCY1,ADCY5,ADCYAP1,ADCYAP1R1,ADGRA2,ADGRB2,ADGRE1,ADGRG6,ADGRL1,ADGRL3,ADGRL4,ADRA2B,ADRA2C,AEBP1,AFAP1L2,AGTR1A,AHI1,AHRR,AK4,AKAP12,AKAP6,ALDH1A3,ALDH7A1,AMIGO1,AMOTL1,ANGPT1,ANGPTL1,ANGPTL2,ANK1,ANK2,ANKRD34A,ANKR…
GO:MF	cation channel activity	GO:0005261	9.54688e-17	16.0201	329	1307	69	21091	ABCC9,ASIC2,ASIC4,CACNA1B,CACNA1C,CACNA1G,CACNA1H,CACNA2D3,CACNB1,CACNB2,CACNG4,CHRNA3,CHRNA5,CNGA3,CNR1,FAM155A,FAM26E,GRIA1,GRIA3,GRIA4,GRIK3,HTR3A,HTR3B,KCNA2,KCNA5,KCNA6,KCNAB1,KCNB1,KCNC2,KCNC4,KCND2,KCND3,KCNE4,KCNF1,KCNG1,KCNH2,KCNIP2,KCNIP4,KCNJ10,KCNJ12,KCNJ5,KCNJ8,KCNK13,KCNK2,KCNK3,KCNMA1,KCNMB1,KCNN3,KCNQ2,KCNQ3,KCNQ4,KCNT2,LRRC55,NALCN,NCS1,P2RX6,PIEZO2,PKD2,RYR2,SCN11A,SCN1B,SCN5A,S…
GO:MF	heparin binding	GO:0008201	3.3518e-16	15.4747	148	1307	44	21091	ADAMTS1,BMP4,CFH,CHRD,CLEC3B,COL23A1,COL5A1,COL5A3,CRISPLD2,CTGF,ECM2,FBLN7,FBN1,FGF1,FGF2,FGF7,FGFR1,FN1,FSTL1,GREM2,NELL1,NELL2,NRP1,NRP2,PCOLCE,PCOLCE2,POSTN,PRELP,PTN,PTPRS,RSPO2,RSPO3,SELP,SERPINE2,SFRP1,SLIT2,SLIT3,TGFBR3,THBS2,THBS3,TNXB,VEGFB,VTN,WISP1
GO:MF	glycosaminoglycan binding	GO:0005539	6.54439e-16	15.1841	206	1307	52	21091	ADAMTS1,BGN,BMP4,CFH,CHRD,CLEC3B,COL23A1,COL5A1,COL5A3,CRISPLD2,CTGF,DCN,ECM2,EGFLAM,ENG,FBLN7,FBN1,FGF1,FGF2,FGF7,FGFR1,FN1,FSTL1,GREM2,LAYN,NELL1,NELL2,NRP1,NRP2,PCOLCE,PCOLCE2,POSTN,PRELP,PTN,PTPRS,RSPO2,RSPO3,SELP,SERPINE2,SFRP1,SLIT2,SLIT3,SPOCK2,SPOCK3,TGFBR3,THBS2,THBS3,TNXB,VCAN,VEGFB,VTN,WISP1
GO:MF	growth factor binding	GO:0019838	6.10226e-15	14.2145	145	1307	42	21091	ACVRL1,CD109,COL1A1,COL1A2,COL3A1,COL5A1,COL6A1,CTGF,ENG,FGFR1,FGFR2,FLT1,FLT4,HTRA3,IGF1R,IGFBP2,IGFBP3,IGFBP4,IGFBP5,IGFBP7,IL1R1,KAZALD1,KDR,LIFR,LRRC32,LTBP1,LTBP3,LTBP4,NKD2,NRP1,PDGFRA,PDGFRB,PTN,SCN5A,SRPX2,TEK,TGFB3,TGFBR3,TWSG1,VASN,WFIKKN2,WISP1
GO:MF	collagen binding	GO:0005518	1.28192e-14	13.8921	70	1307	29	21091	ADGRG6,AEBP1,ANTXR1,ASPN,CCBE1,CHADL,COL6A1,COL6A2,COL6A4,CRTAP,CSPG4,DCN,DDR2,ECM2,ITGA11,ITGA9,ITGB1,LUM,MRC2,MUSK,NID1,PCOLCE,PCOLCE2,SERPINH1,SPARC,SPARCL1,TNXB,VTN,VWF
GO:MF	gated channel activity	GO:0022836	1.01722e-13	12.9926	329	1307	64	21091	ANO2,ASIC2,ASIC4,CACNA1B,CACNA1C,CACNA1G,CACNA1H,CACNA2D3,CACNB1,CACNB2,CACNG4,CHRNA3,CHRNA5,CNGA3,CNR1,FAM155A,GABRB3,GLRB,GRIA1,GRIA3,GRIA4,GRIK3,HTR3A,HTR3B,KCNA2,KCNA5,KCNA6,KCNAB1,KCNB1,KCNC2,KCNC4,KCND2,KCND3,KCNE4,KCNF1,KCNG1,KCNH2,KCNIP2,KCNIP4,KCNJ10,KCNJ12,KCNJ5,KCNJ8,KCNK13,KCNK2,KCNK3,KCNMA1,KCNMB1,KCNN3,KCNQ2,KCNQ3,KCNQ4,KCNT2,LRRC55,NCS1,P2RX6,PIEZO2,PKD2,RYR2,SCN11A,SCN1B,SCN5A,SCN…
GO:MF	cytoskeletal protein binding	GO:0008092	1.23459e-13	12.9085	983	1307	129	21091	ABLIM2,ABLIM3,ANK1,ANTXR1,APBB1,APC2,AXL,BAG2,BRSK1,CACNA1C,CACNB2,CALD1,CAP2,CAV3,CFL2,CLIP3,CLIP4,CNN1,CRYAB,CSRP1,CTNNA2,CTNNA3,DAAM2,DES,DLG4,DMD,DMTN,DNAL1,DYSF,EML1,ENAH,FABP3,FAM107A,FAM83D,FERMT2,FEZ1,FGF13,FHOD3,FLNA,FLNC,FMN2,FXYD1,GAS2L2,GJA1,GRIA1,HIP1,HPCA,HSPA2,HSPB7,ITGB1,JMY,KCNA2,KCNA5,KCNQ2,KIF1A,KIF26B,KIF5A,KIF5C,KIF7,KIRREL,LARP6,LIMCH1,LMOD1,MAP1B,MAPK8IP1,MAPK8IP2,MAPT,MAST…
GO:MF	ion channel activity	GO:0005216	2.17765e-13	12.662	424	1307	74	21091	ABCC9,ANO2,ASIC2,ASIC4,CACNA1B,CACNA1C,CACNA1G,CACNA1H,CACNA2D3,CACNB1,CACNB2,CACNG4,CHRNA3,CHRNA5,CNGA3,CNR1,FAM155A,FAM26E,GABRB3,GJC1,GJD3,GLRB,GRIA1,GRIA3,GRIA4,GRIK3,HTR3A,HTR3B,KCNA2,KCNA5,KCNA6,KCNAB1,KCNB1,KCNC2,KCNC4,KCND2,KCND3,KCNE4,KCNF1,KCNG1,KCNH2,KCNIP2,KCNIP4,KCNJ10,KCNJ12,KCNJ5,KCNJ8,KCNK13,KCNK2,KCNK3,KCNMA1,KCNMB1,KCNN3,KCNQ2,KCNQ3,KCNQ4,KCNT2,LRRC55,NALCN,NCS1,P2RX6,PIEZO2,PKD…
GO:MF	structural molecule activity	GO:0005198	3.01929e-13	12.5201	611	1307	93	21091	ANK2,ASPN,BGN,BMPER,BVES,COL12A1,COL14A1,COL16A1,COL18A1,COL1A1,COL1A2,COL23A1,COL28A1,COL3A1,COL4A5,COL5A1,COL5A2,COL5A3,COL6A1,COL6A2,COL6A3,COL6A4,COL8A1,COL8A2,CRYAB,CSRP1,CTNNA2,DCN,DES,DLG2,DLG4,DMD,DPT,ECM1,EFEMP1,EFEMP2,EMILIN1,FBLN2,FBLN5,FBN1,FN1,GFAP,HMCN2,HSPB6,INA,KRT17,LAMA1,LAMA2,LAMA4,LAMB1,LAMB2,LTBP1,LUM,MARVELD1,MFAP4,MMRN2,MPP2,MYH11,MYL1,MYOM1,NEFL,NEFM,NEXN,NID1,NTN1,OGN,PCO…
GO:MF	channel activity	GO:0015267	3.38902e-13	12.4699	465	1307	78	21091	ABCC9,ANO2,ASIC2,ASIC4,CACNA1B,CACNA1C,CACNA1G,CACNA1H,CACNA2D3,CACNB1,CACNB2,CACNG4,CHRNA3,CHRNA5,CNGA3,CNR1,FAM155A,FAM26E,GABRB3,GJA1,GJA5,GJC1,GJC2,GJC3,GJD3,GLRB,GRIA1,GRIA3,GRIA4,GRIK3,HTR3A,HTR3B,KCNA2,KCNA5,KCNA6,KCNAB1,KCNB1,KCNC2,KCNC4,KCND2,KCND3,KCNE4,KCNF1,KCNG1,KCNH2,KCNIP2,KCNIP4,KCNJ10,KCNJ12,KCNJ5,KCNJ8,KCNK13,KCNK2,KCNK3,KCNMA1,KCNMB1,KCNN3,KCNQ2,KCNQ3,KCNQ4,KCNT2,LRRC55,NALCN,N…
GO:MF	passive transmembrane transporter activity	GO:0022803	3.38902e-13	12.4699	465	1307	78	21091	ABCC9,ANO2,ASIC2,ASIC4,CACNA1B,CACNA1C,CACNA1G,CACNA1H,CACNA2D3,CACNB1,CACNB2,CACNG4,CHRNA3,CHRNA5,CNGA3,CNR1,FAM155A,FAM26E,GABRB3,GJA1,GJA5,GJC1,GJC2,GJC3,GJD3,GLRB,GRIA1,GRIA3,GRIA4,GRIK3,HTR3A,HTR3B,KCNA2,KCNA5,KCNA6,KCNAB1,KCNB1,KCNC2,KCNC4,KCND2,KCND3,KCNE4,KCNF1,KCNG1,KCNH2,KCNIP2,KCNIP4,KCNJ10,KCNJ12,KCNJ5,KCNJ8,KCNK13,KCNK2,KCNK3,KCNMA1,KCNMB1,KCNN3,KCNQ2,KCNQ3,KCNQ4,KCNT2,LRRC55,NALCN,N…
GO:MF	cell adhesion molecule binding	GO:0050839	2.8908e-12	11.539	273	1307	55	21091	ADGRL1,CADM1,CCDC141,CDH11,CDH13,CDH19,CDH2,CDH3,CDH5,CDH6,CNTN5,COL16A1,COL3A1,CTGF,CTNNA2,CTNNA3,CXCL12,DCHS1,DMD,EDIL3,EMILIN1,FBLN5,FBN1,FERMT2,FGF1,FGF2,FGFR1,FN1,GFAP,GFRA1,IGF1,ITGA11,ITGB1,JAM2,JAM3,KDR,KIRREL,LAMB1,LAMB2,LRRC4C,NEXN,NLGN2,NOS3,NPNT,PLPP3,PLXNB3,POSTN,PTN,PTPRB,PTPRM,TIMP2,TRPC4,VTN,VWF,WISP1
GO:MF	voltage-gated cation channel activity	GO:0022843	1.02738e-11	10.9883	139	1307	37	21091	CACNA1B,CACNA1C,CACNA1G,CACNA1H,CACNA2D3,CACNB1,CACNB2,CACNG4,CNR1,KCNA2,KCNA5,KCNA6,KCNAB1,KCNB1,KCNC2,KCNC4,KCND2,KCND3,KCNE4,KCNF1,KCNG1,KCNH2,KCNIP2,KCNJ10,KCNJ12,KCNJ5,KCNJ8,KCNK2,KCNK3,KCNQ2,KCNQ3,KCNQ4,KCNT2,LRRC55,NCS1,PKD2,SNAP25
GO:MF	metal ion transmembrane transporter activity	GO:0046873	1.34155e-11	10.8724	419	1307	70	21091	ABCC9,ASIC2,ASIC4,ATP1A2,ATP1B2,ATP2B3,ATP2B4,CACNA1B,CACNA1C,CACNA1G,CACNA1H,CACNA2D3,CACNB1,CACNB2,CACNG4,CNR1,FAM155A,GRIK3,KCNA2,KCNA5,KCNA6,KCNAB1,KCNB1,KCNC2,KCNC4,KCND2,KCND3,KCNE4,KCNF1,KCNG1,KCNH2,KCNIP2,KCNIP4,KCNJ10,KCNJ12,KCNJ5,KCNJ8,KCNK13,KCNK2,KCNK3,KCNMA1,KCNMB1,KCNN3,KCNQ2,KCNQ3,KCNQ4,KCNT2,LRRC55,NCS1,NIPA1,NIPAL4,PKD2,RYR2,SCN11A,SCN1B,SCN5A,SCN7A,SLC10A4,SLC10A6,SLC18A2,SLC24A…
GO:MF	potassium channel activity	GO:0005267	1.58328e-11	10.8004	120	1307	34	21091	ABCC9,GRIK3,KCNA2,KCNA5,KCNA6,KCNAB1,KCNB1,KCNC2,KCNC4,KCND2,KCND3,KCNE4,KCNF1,KCNG1,KCNH2,KCNIP2,KCNIP4,KCNJ10,KCNJ12,KCNJ5,KCNJ8,KCNK13,KCNK2,KCNK3,KCNMA1,KCNMB1,KCNN3,KCNQ2,KCNQ3,KCNQ4,KCNT2,LRRC55,PKD2,SNAP25
GO:MF	inorganic cation transmembrane transporter activity	GO:0022890	1.69923e-11	10.7697	569	1307	85	21091	ABCC9,ASIC2,ASIC4,ATP1A2,ATP1B2,ATP2B3,ATP2B4,CACNA1B,CACNA1C,CACNA1G,CACNA1H,CACNA2D3,CACNB1,CACNB2,CACNG4,CHRNA3,CHRNA5,CNGA3,CNR1,FAM155A,FAM26E,GRIA1,GRIA3,GRIA4,GRIK3,HTR3A,HTR3B,KCNA2,KCNA5,KCNA6,KCNAB1,KCNB1,KCNC2,KCNC4,KCND2,KCND3,KCNE4,KCNF1,KCNG1,KCNH2,KCNIP2,KCNIP4,KCNJ10,KCNJ12,KCNJ5,KCNJ8,KCNK13,KCNK2,KCNK3,KCNMA1,KCNMB1,KCNN3,KCNQ2,KCNQ3,KCNQ4,KCNT2,LRRC55,NALCN,NCS1,NIPA1,NIPAL4,P2…
GO:MF	voltage-gated ion channel activity	GO:0005244	3.37156e-11	10.4722	189	1307	43	21091	CACNA1B,CACNA1C,CACNA1G,CACNA1H,CACNA2D3,CACNB1,CACNB2,CACNG4,CNR1,KCNA2,KCNA5,KCNA6,KCNAB1,KCNB1,KCNC2,KCNC4,KCND2,KCND3,KCNE4,KCNF1,KCNG1,KCNH2,KCNIP2,KCNIP4,KCNJ10,KCNJ12,KCNJ5,KCNJ8,KCNK13,KCNK2,KCNK3,KCNQ2,KCNQ3,KCNQ4,KCNT2,LRRC55,NCS1,PKD2,SCN11A,SCN1B,SCN5A,SCN7A,SNAP25
GO:MF	voltage-gated channel activity	GO:0022832	4.10182e-11	10.387	190	1307	43	21091	CACNA1B,CACNA1C,CACNA1G,CACNA1H,CACNA2D3,CACNB1,CACNB2,CACNG4,CNR1,KCNA2,KCNA5,KCNA6,KCNAB1,KCNB1,KCNC2,KCNC4,KCND2,KCND3,KCNE4,KCNF1,KCNG1,KCNH2,KCNIP2,KCNIP4,KCNJ10,KCNJ12,KCNJ5,KCNJ8,KCNK13,KCNK2,KCNK3,KCNQ2,KCNQ3,KCNQ4,KCNT2,LRRC55,NCS1,PKD2,SCN11A,SCN1B,SCN5A,SCN7A,SNAP25
GO:MF	extracellular matrix structural constituent conferring tensile strength	GO:0030020	7.42328e-11	10.1294	34	1307	18	21091	COL12A1,COL14A1,COL16A1,COL18A1,COL1A1,COL1A2,COL23A1,COL28A1,COL3A1,COL4A5,COL5A1,COL5A2,COL5A3,COL6A1,COL6A2,COL6A3,COL6A4,COL8A1
GO:MF	ion channel binding	GO:0044325	9.22597e-11	10.035	141	1307	36	21091	ABCC9,AKAP6,ANK1,ANK2,BAG2,CACNA1C,CAV1,CAV3,CDH5,CNTNAP2,DPP10,FGF13,FKBP1B,FLNA,FXYD1,KCNAB1,KCNB1,KCNC2,KCND3,KCNE4,KCNIP2,KCNQ3,LRRC55,MPP2,NOS1,PIRT,PKD2,PPP1R9A,RIMS3,RNF207,SCN1B,SCN5A,SNAP25,STAC,TCAF1,TRDN
GO:MF	voltage-gated potassium channel activity	GO:0005249	2.46444e-10	9.60828	84	1307	27	21091	KCNA2,KCNA5,KCNA6,KCNAB1,KCNB1,KCNC2,KCNC4,KCND2,KCND3,KCNE4,KCNF1,KCNG1,KCNH2,KCNIP2,KCNJ10,KCNJ12,KCNJ5,KCNJ8,KCNK2,KCNK3,KCNQ2,KCNQ3,KCNQ4,KCNT2,LRRC55,PKD2,SNAP25
GO:MF	potassium ion transmembrane transporter activity	GO:0015079	3.98984e-10	9.39904	155	1307	37	21091	ABCC9,ATP1A2,ATP1B2,GRIK3,KCNA2,KCNA5,KCNA6,KCNAB1,KCNB1,KCNC2,KCNC4,KCND2,KCND3,KCNE4,KCNF1,KCNG1,KCNH2,KCNIP2,KCNIP4,KCNJ10,KCNJ12,KCNJ5,KCNJ8,KCNK13,KCNK2,KCNK3,KCNMA1,KCNMB1,KCNN3,KCNQ2,KCNQ3,KCNQ4,KCNT2,LRRC55,PKD2,SLC24A3,SNAP25
GO:MF	cation transmembrane transporter activity	GO:0008324	6.71222e-10	9.17313	618	1307	86	21091	ABCC9,ASIC2,ASIC4,ATP1A2,ATP1B2,ATP2B3,ATP2B4,CACNA1B,CACNA1C,CACNA1G,CACNA1H,CACNA2D3,CACNB1,CACNB2,CACNG4,CHRNA3,CHRNA5,CNGA3,CNR1,FAM155A,FAM26E,GRIA1,GRIA3,GRIA4,GRIK3,HTR3A,HTR3B,KCNA2,KCNA5,KCNA6,KCNAB1,KCNB1,KCNC2,KCNC4,KCND2,KCND3,KCNE4,KCNF1,KCNG1,KCNH2,KCNIP2,KCNIP4,KCNJ10,KCNJ12,KCNJ5,KCNJ8,KCNK13,KCNK2,KCNK3,KCNMA1,KCNMB1,KCNN3,KCNQ2,KCNQ3,KCNQ4,KCNT2,LRRC55,NALCN,NCS1,NIPA1,NIPAL4,P2…
GO:MF	sulfur compound binding	GO:1901681	9.00391e-10	9.04557	258	1307	49	21091	ADAMTS1,BMP4,CFH,CHRD,CLEC3B,COL23A1,COL5A1,COL5A3,CRISPLD2,CTGF,ECM2,FBLN7,FBN1,FGF1,FGF2,FGF7,FGFR1,FN1,FSTL1,GREM1,GREM2,HPSE2,NELL1,NELL2,NRP1,NRP2,OGDHL,PCOLCE,PCOLCE2,POSTN,PRELP,PTGES,PTN,PTPRS,RSPO2,RSPO3,RYR2,SELP,SERPINE2,SFRP1,SLIT2,SLIT3,TGFBR3,THBS2,THBS3,TNXB,VEGFB,VTN,WISP1
GO:MF	signaling receptor binding	GO:0005102	2.84643e-09	8.5457	1780	1307	182	21091	9330182L06RIK,ADCYAP1,ADRA2C,AGTR1A,ANGPT1,ANGPTL1,ANGPTL2,APLN,ARTN,BBS1,BDKRB2,BEX2,BMP4,BMP5,C1QTNF2,C1QTNF9,CACNG4,CADM1,CADM4,CAV1,CAV2,CDH5,CERS1,CHN1,CMTM5,CNRIP1,CNTFR,COL16A1,COL3A1,COLEC10,CTGF,CXCL12,CXCL14,DHH,DKK2,DKK3,DLG4,DMD,DMTN,DNER,DOCK4,ECM1,EDA,EDIL3,EDNRB,EFEMP1,EFNA5,EMILIN1,ENG,ENHO,EPHA7,ESR1,F2R,FAM19A1,FAM19A5,FBLN5,FBN1,FERMT2,FGF1,FGF13,FGF18,FGF2,FGF7,FGFR1,FIBCD1,FK…
GO:MF	peptide receptor activity	GO:0001653	3.34715e-09	8.47533	150	1307	35	21091	ACKR3,ACKR4,ADCYAP1R1,AGTR1A,APLNR,BDKRB2,CALCRL,CX3CR1,EDNRA,EDNRB,F2R,GAL,GALR2,GCGR,GLP2R,GPR37,GPR37L1,GRPR,NMUR1,NPR1,NPR2,NPY1R,NPY2R,NPY4R,NTSR1,OPRK1,OPRL1,PTH1R,RAMP2,SSTR1,SSTR4,TACR1,TACR2,TACR3,XCR1
GO:MF	G protein-coupled peptide receptor activity	GO:0008528	1.83796e-08	7.73566	143	1307	33	21091	ACKR3,ACKR4,ADCYAP1R1,AGTR1A,APLNR,BDKRB2,CALCRL,CX3CR1,EDNRA,EDNRB,F2R,GAL,GALR2,GCGR,GLP2R,GPR37,GPR37L1,GRPR,NMUR1,NPY1R,NPY2R,NPY4R,NTSR1,OPRK1,OPRL1,PTH1R,RAMP2,SSTR1,SSTR4,TACR1,TACR2,TACR3,XCR1
GO:MF	actin binding	GO:0003779	3.80487e-08	7.41966	442	1307	65	21091	ABLIM2,ABLIM3,ANTXR1,CACNB2,CALD1,CAP2,CFL2,CNN1,CTNNA2,CTNNA3,DAAM2,DMD,DMTN,ENAH,FAM107A,FERMT2,FHOD3,FLNA,FLNC,FMN2,GAS2L2,HIP1,HPCA,ITGB1,JMY,LIMCH1,LMOD1,MAP1B,MTSS1L,MYH10,MYH11,MYLK,MYO9A,MYOM1,NEXN,NOS3,PARVA,PARVB,PDLIM3,PDLIM4,PDLIM7,PHACTR1,PHACTR2,PKNOX2,PLEKHH2,PLS3,PPP1R9A,SHANK3,SHROOM4,SMTN,SNCA,SNTB1,SNTG2,STK38L,SYN1,SYNPO2,TAGLN,TMOD1,TNNT2,TNS1,TPM1,TPM2,TRPC6,VASH1,WASF3
GO:MF	inorganic molecular entity transmembrane transporter activity	GO:0015318	3.92385e-07	6.40629	813	1307	96	21091	ABCC9,ANO2,ASIC2,ASIC4,ATP1A2,ATP1B2,ATP2B3,ATP2B4,CACNA1B,CACNA1C,CACNA1G,CACNA1H,CACNA2D3,CACNB1,CACNB2,CACNG4,CHRNA3,CHRNA5,CNGA3,CNR1,FAM155A,FAM26E,GABRB3,GJA1,GJC1,GJD3,GLRB,GRIA1,GRIA3,GRIA4,GRIK3,HTR3A,HTR3B,KCNA2,KCNA5,KCNA6,KCNAB1,KCNB1,KCNC2,KCNC4,KCND2,KCND3,KCNE4,KCNF1,KCNG1,KCNH2,KCNIP2,KCNIP4,KCNJ10,KCNJ12,KCNJ5,KCNJ8,KCNK13,KCNK2,KCNK3,KCNMA1,KCNMB1,KCNN3,KCNQ2,KCNQ3,KCNQ4,KCNT2,L…
GO:MF	transmembrane transporter activity	GO:0022857	6.45211e-07	6.1903	1060	1307	116	21091	ABCA8A,ABCA9,ABCC9,ABCG4,ANO2,ASIC2,ASIC4,ATP1A2,ATP1B2,ATP2B3,ATP2B4,CACNA1B,CACNA1C,CACNA1G,CACNA1H,CACNA2D3,CACNB1,CACNB2,CACNG4,CHRNA3,CHRNA5,CNGA3,CNR1,CPLX1,FAM155A,FAM26E,GABRB3,GJA1,GJA5,GJC1,GJC2,GJC3,GJD3,GLRB,GRIA1,GRIA3,GRIA4,GRIK3,HTR3A,HTR3B,KCNA2,KCNA5,KCNA6,KCNAB1,KCNB1,KCNC2,KCNC4,KCND2,KCND3,KCNE4,KCNF1,KCNG1,KCNH2,KCNIP2,KCNIP4,KCNJ10,KCNJ12,KCNJ5,KCNJ8,KCNK13,KCNK2,KCNK3,KCNMA…
GO:MF	monovalent inorganic cation transmembrane transporter activity	GO:0015077	6.86183e-07	6.16356	359	1307	54	21091	ABCC9,ASIC2,ASIC4,ATP1A2,ATP1B2,CACNA1G,GRIK3,KCNA2,KCNA5,KCNA6,KCNAB1,KCNB1,KCNC2,KCNC4,KCND2,KCND3,KCNE4,KCNF1,KCNG1,KCNH2,KCNIP2,KCNIP4,KCNJ10,KCNJ12,KCNJ5,KCNJ8,KCNK13,KCNK2,KCNK3,KCNMA1,KCNMB1,KCNN3,KCNQ2,KCNQ3,KCNQ4,KCNT2,LRRC55,PKD2,SCN11A,SCN1B,SCN5A,SCN7A,SLC10A4,SLC10A6,SLC18A2,SLC24A3,SLC2A13,SLC2A4,SLC45A1,SLC5A7,SLC6A15,SLC8A1,SLC8A2,SNAP25
GO:MF	integrin binding	GO:0005178	9.62346e-07	6.01667	132	1307	29	21091	COL16A1,COL3A1,CTGF,CXCL12,DMD,EDIL3,EMILIN1,FBLN5,FBN1,FERMT2,FGF1,FGF2,FN1,GFAP,GFRA1,IGF1,ITGB1,JAM2,JAM3,KDR,LAMB1,LAMB2,NPNT,PLPP3,PTN,TIMP2,VTN,VWF,WISP1
GO:MF	protein-containing complex binding	GO:0044877	1.41981e-06	5.84777	1451	1307	146	21091	ABLIM2,ABLIM3,ACVRL1,ADGRG6,AEBP1,ANK1,ANTXR1,APBA1,APBB1,ASPN,CACNB2,CALY,CAV1,CAV3,CCBE1,CD300LG,CD93,CDH13,CDH2,CDH5,CFL2,CHADL,CHRNA3,CHRNA5,COL16A1,COL3A1,COL6A1,COL6A2,COL6A4,COLEC12,CPEB1,CRTAP,CRYAB,CSPG4,CTGF,CTNNA2,CTNNA3,CXCL12,DCN,DDR2,DLG2,DLG4,DMD,DMTN,ECM2,EDIL3,EMILIN1,ENO2,ESR1,F2R,FBLN5,FBN1,FERMT2,FGF1,FGF2,FGFR1,FHOD3,FLNA,FN1,FSTL3,GABRB3,GAS2L2,GFAP,GFRA1,GLI3,GLRB,GNAI1,GNA…
GO:MF	transforming growth factor beta binding	GO:0050431	2.20966e-06	5.65568	24	1307	12	21091	ACVRL1,CD109,ENG,LRRC32,LTBP1,LTBP3,LTBP4,TGFB3,TGFBR3,TWSG1,VASN,WFIKKN2
GO:MF	transmembrane receptor protein kinase activity	GO:0019199	2.77657e-06	5.55649	84	1307	22	21091	ACVRL1,AXL,DDR2,EFEMP1,ENG,EPHA7,FGFR1,FGFR2,FLT1,FLT4,IGF1R,KDR,MUSK,NRP1,NRP2,PDGFRA,PDGFRB,ROR1,ROR2,TEK,TGFBR3,TIE1
GO:MF	identical protein binding	GO:0042802	3.22832e-06	5.49102	2143	1307	197	21091	ABCC9,ABCG4,ADAMTSL4,ADARB1,ADRA2C,AHI1,ALDH1A3,ALDH7A1,AMOTL1,ANGPT1,ANO2,ANXA1,AOC3,AOX1,APLN,ATL1,BAG2,BMP4,C1QTNF2,C1QTNF3,C1QTNF7,C1QTNF9,C1RA,CACNB2,CADM1,CADM3,CAP2,CASKIN1,CASQ1,CASQ2,CAV1,CAV2,CDH13,CDH2,CDR2L,CERCAM,CFH,CIDEA,CNKSR2,CNR1,COL18A1,COL1A1,COL1A2,COL23A1,CRYAB,CTNNA2,DACT3,DAPK1,DES,EHD2,EMILIN1,ENG,ENO2,EPOR,ESR1,FBLN5,FBN1,FGF2,FGFR1,FGFR2,FIBIN,FLNA,FLNC,FLT4,FN1,FOXP2,F…
GO:MF	transporter activity	GO:0005215	4.48711e-06	5.34803	1146	1307	120	21091	ABCA8A,ABCA9,ABCC9,ABCG4,ANO2,ASIC2,ASIC4,ATP10A,ATP1A2,ATP1B2,ATP2B3,ATP2B4,CACNA1B,CACNA1C,CACNA1G,CACNA1H,CACNA2D3,CACNB1,CACNB2,CACNG4,CHRNA3,CHRNA5,CNGA3,CNR1,CPLX1,FABP3,FAM155A,FAM26E,GABRB3,GJA1,GJA5,GJC1,GJC2,GJC3,GJD3,GLRB,GRIA1,GRIA3,GRIA4,GRIK3,HTR3A,HTR3B,IGF1R,KCNA2,KCNA5,KCNA6,KCNAB1,KCNB1,KCNC2,KCNC4,KCND2,KCND3,KCNE4,KCNF1,KCNG1,KCNH2,KCNIP2,KCNIP4,KCNJ10,KCNJ12,KCNJ5,KCNJ8,KCNK1…
GO:MF	transmembrane receptor protein tyrosine kinase activity	GO:0004714	5.60944e-06	5.25108	66	1307	19	21091	AXL,DDR2,EFEMP1,EPHA7,FGFR1,FGFR2,FLT1,FLT4,IGF1R,KDR,MUSK,NRP1,NRP2,PDGFRA,PDGFRB,ROR1,ROR2,TEK,TIE1
GO:MF	ion channel regulator activity	GO:0099106	6.04125e-06	5.21887	110	1307	25	21091	ABCC9,AMIGO1,ANK2,CACNB2,CACNG4,CAV1,CAV3,DPP6,FKBP1B,FLNA,FXYD1,FXYD6,FXYD7,HPCAL4,KCNAB1,KCNE4,KCNIP2,KCNIP4,KCNK2,KCNMB1,LRRC55,PLN,PRKG1,REM1,SCN1B
GO:MF	outward rectifier potassium channel activity	GO:0015271	1.06332e-05	4.97334	14	1307	9	21091	KCNA2,KCNA5,KCNB1,KCND2,KCND3,KCNIP2,KCNK2,KCNT2,PKD2
GO:MF	channel regulator activity	GO:0016247	1.37931e-05	4.86034	139	1307	28	21091	ABCC9,AMIGO1,ANK2,ATP2B4,CACNB2,CACNG4,CAV1,CAV3,DPP6,FGF13,FKBP1B,FLNA,FXYD1,FXYD6,FXYD7,HPCAL4,KCNAB1,KCNE4,KCNIP2,KCNIP4,KCNK2,KCNMB1,LRRC55,NOS1,PLN,PRKG1,REM1,SCN1B
GO:MF	ion transmembrane transporter activity	GO:0015075	1.50531e-05	4.82237	922	1307	100	21091	ABCC9,ANO2,ASIC2,ASIC4,ATP1A2,ATP1B2,ATP2B3,ATP2B4,CACNA1B,CACNA1C,CACNA1G,CACNA1H,CACNA2D3,CACNB1,CACNB2,CACNG4,CHRNA3,CHRNA5,CNGA3,CNR1,FAM155A,FAM26E,GABRB3,GJA1,GJC1,GJD3,GLRB,GRIA1,GRIA3,GRIA4,GRIK3,HTR3A,HTR3B,KCNA2,KCNA5,KCNA6,KCNAB1,KCNB1,KCNC2,KCNC4,KCND2,KCND3,KCNE4,KCNF1,KCNG1,KCNH2,KCNIP2,KCNIP4,KCNJ10,KCNJ12,KCNJ5,KCNJ8,KCNK13,KCNK2,KCNK3,KCNMA1,KCNMB1,KCNN3,KCNQ2,KCNQ3,KCNQ4,KCNT2,L…
GO:MF	extracellular matrix binding	GO:0050840	1.85699e-05	4.73119	57	1307	17	21091	ADGRG6,BGN,CD248,CLEC14A,DCN,ECM1,FBLN2,ITGA9,ITGB1,NID1,OLFML2A,SLIT2,SPARC,SPARCL1,SPOCK2,SSC5D,VTN
GO:MF	PDZ domain binding	GO:0030165	2.73413e-05	4.56318	110	1307	24	21091	APBA1,ATP2B3,ATP2B4,CADM1,DLG2,DLG4,DMD,DOCK4,DTNA,FZD1,FZD2,GJA1,GRIA1,GRIA3,KCNJ12,LIN7B,MPP2,MUSK,NKD1,SDC2,SHISA6,SNTB1,SNTG2,TMEM88
GO:MF	vascular endothelial growth factor-activated receptor activity	GO:0005021	3.01214e-05	4.52112	6	1307	6	21091	FLT1,FLT4,KDR,NRP1,NRP2,PDGFRA
GO:MF	metal ion binding	GO:0046872	6.26651e-05	4.20297	4080	1307	327	21091	ABLIM2,ABLIM3,ACVRL1,ADAMDEC1,ADAMTS1,ADAMTS18,ADAMTS4,ADAMTS7,ADAMTS8,ADARB1,ADCY1,ADCY5,ADGRE1,ADGRL3,ADGRL4,AEBP1,ANTXR1,ANXA1,AOAH,AOC3,AOX1,ARSI,ASPHD2,ASPN,ASTN2,ATP10A,ATP1A2,ATP2B3,ATP2B4,B4GALT2,BCL6B,BNC2,BRSK1,BRSK2,C1RA,C1S1,CACNA1B,CACNA1C,CACNA2D3,CADPS,CALB2,CAR11,CAR14,CASQ1,CASQ2,CCBE1,CD248,CD93,CDH11,CDH13,CDH19,CDH2,CDH3,CDH5,CDH6,CHN1,CLEC3B,CLSTN2,CLSTN3,COL18A1,COL1A1,COL1A…
GO:MF	neuropeptide receptor activity	GO:0008188	6.32547e-05	4.19891	42	1307	14	21091	GAL,GALR2,GPR37,GRPR,NMUR1,NPY1R,NPY2R,NPY4R,NTSR1,SSTR1,SSTR4,TACR1,TACR2,TACR3
GO:MF	cation binding	GO:0043169	7.82698e-05	4.10641	4177	1307	333	21091	ABLIM2,ABLIM3,ACVRL1,ADAMDEC1,ADAMTS1,ADAMTS18,ADAMTS4,ADAMTS7,ADAMTS8,ADARB1,ADCY1,ADCY5,ADGRE1,ADGRL3,ADGRL4,AEBP1,ANTXR1,ANXA1,AOAH,AOC3,AOX1,ARSI,ASPHD2,ASPN,ASTN2,ATP10A,ATP1A2,ATP2B3,ATP2B4,B4GALT2,BCL6B,BNC2,BRSK1,BRSK2,C1RA,C1S1,CACNA1B,CACNA1C,CACNA2D3,CADPS,CALB2,CAR11,CAR14,CASQ1,CASQ2,CCBE1,CD248,CD93,CDH11,CDH13,CDH19,CDH2,CDH3,CDH5,CDH6,CHN1,CHRNA3,CHRNA5,CLEC3B,CLSTN2,CLSTN3,COL18A…
GO:MF	potassium channel regulator activity	GO:0015459	0.000167537	3.77589	45	1307	14	21091	ABCC9,AMIGO1,ANK2,CAV1,CAV3,DPP6,FLNA,KCNAB1,KCNE4,KCNIP2,KCNIP4,KCNK2,KCNMB1,LRRC55
GO:MF	proteoglycan binding	GO:0043394	0.000179374	3.74624	39	1307	13	21091	CFH,CHRD,COL5A1,COL5A3,FBLN7,FN1,GREM1,HPSE2,NID1,PTN,PTPRS,SLIT2,TNC
GO:MF	calmodulin binding	GO:0005516	0.000182966	3.73763	184	1307	31	21091	ADCY1,AEBP1,AKAP12,ATP2B4,CACNA1C,CALD1,CAMK1G,CNN1,DAPK1,EFCAB9,FBXL2,GAP43,KCNN3,KCNQ2,KCNQ3,KCNQ4,MYH10,MYLK,NOS1,NOS3,PDE1A,PLCB1,PNCK,REM1,RIT2,RYR2,SCN5A,SLC8A1,SLC8A2,SNTB1,SYT1
GO:MF	delayed rectifier potassium channel activity	GO:0005251	0.000214925	3.66771	28	1307	11	21091	KCNA2,KCNA5,KCNA6,KCNB1,KCNC2,KCNC4,KCNE4,KCNG1,KCNH2,KCNQ3,KCNQ4
GO:MF	metalloendopeptidase inhibitor activity	GO:0008191	0.000245593	3.60978	14	1307	8	21091	NGF,RARRES1,RECK,SPOCK1,SPOCK3,TIMP2,TIMP3,WFIKKN2
GO:MF	cytokine binding	GO:0019955	0.000267838	3.57213	141	1307	26	21091	ACKR1,ACKR3,ACKR4,ACVRL1,CD109,CNTFR,CX3CR1,ENG,FGF2,GREM1,GREM2,IL1R1,ITGB1,LEPR,LIFR,LRRC32,LTBP1,LTBP3,LTBP4,NOG,TGFB3,TGFBR3,TWSG1,VASN,WFIKKN2,XCR1
GO:MF	vascular endothelial growth factor binding	GO:0038085	0.000487819	3.31174	5	1307	5	21091	KDR,NRP1,PDGFRA,PDGFRB,PTN
GO:MF	clathrin binding	GO:0030276	0.000667523	3.17553	64	1307	16	21091	CALY,DAB2,DNAJC6,EPN2,HIP1,NSG1,NSG2,SNAP91,SYT1,SYT13,SYT15,SYT17,SYT4,SYT6,SYT9,TRPC6
GO:MF	extracellular matrix structural constituent conferring compression resistance	GO:0030021	0.00111606	2.95231	12	1307	7	21091	ASPN,BGN,DCN,LUM,OGN,PRELP,SPOCK2
GO:MF	platelet-derived growth factor binding	GO:0048407	0.00111606	2.95231	12	1307	7	21091	COL1A1,COL1A2,COL3A1,COL5A1,COL6A1,PDGFRA,PDGFRB
GO:MF	insulin-like growth factor binding	GO:0005520	0.00203316	2.69183	28	1307	10	21091	CTGF,HTRA3,IGF1R,IGFBP2,IGFBP3,IGFBP4,IGFBP5,IGFBP7,KAZALD1,WISP1
GO:MF	L-ascorbic acid binding	GO:0031418	0.0046718	2.33052	19	1307	8	21091	DBH,P3H1,P3H2,P3H3,P4HA2,P4HTM,PAM,PLOD2
GO:MF	ligand-gated cation channel activity	GO:0099094	0.00491484	2.30849	99	1307	19	21091	ASIC2,ASIC4,CHRNA3,CHRNA5,CNGA3,GRIA1,GRIA3,GRIA4,GRIK3,HTR3A,HTR3B,KCNH2,KCNJ10,KCNJ12,KCNJ5,KCNJ8,P2RX6,PKD2,RYR2
GO:MF	coreceptor activity	GO:0015026	0.0058176	2.23526	25	1307	9	21091	ACKR3,CSPG4,ENG,GFRA4,RAMP2,RECK,RGMA,RGMB,TGFBR3
GO:MF	scaffold protein binding	GO:0097110	0.00612462	2.21292	75	1307	16	21091	ADCY5,ATP2B4,CACNA1G,CACNA1H,CAV2,DLG4,GJA1,GRIA1,KCNA5,KCNH2,KIF5A,NOS1,NOS3,RYR2,SCN5A,SHANK3
GO:MF	carbohydrate binding	GO:0030246	0.0065111	2.18635	281	1307	37	21091	ADGRL1,ADGRL3,CD248,CD93,CHODL,CLEC14A,CLEC1A,CLEC3B,CLEC4A3,CNTN1,COLEC10,COLEC12,DBH,ENG,FBXO2,GALNT16,GALNT18,LAYN,LOXL2,MGL2,MRC2,NPTX2,P3H1,P3H2,P3H3,P4HA2,P4HTM,PAM,PFKM,PLA2R1,PLOD2,PPP1R3C,PTPRB,SELP,STBD1,VCAN,VTN
GO:MF	cadherin binding	GO:0045296	0.00746711	2.12685	68	1307	15	21091	CDH11,CDH13,CDH19,CDH2,CDH3,CDH5,CDH6,CTNNA2,CTNNA3,DCHS1,KDR,NOS3,PTPRB,PTPRM,TRPC4
GO:MF	gap junction channel activity involved in cardiac conduction electrical coupling	GO:0086075	0.00789458	2.10267	4	1307	4	21091	GJA1,GJA5,GJC1,GJD3
GO:MF	neuropeptide binding	GO:0042923	0.00840914	2.07525	26	1307	9	21091	ADCYAP1R1,GALR2,GPR149,GPR37,GRPR,NMUR1,OPRK1,OPRL1,SSTR1
GO:MF	kinase binding	GO:0019900	0.00884926	2.05309	827	1307	82	21091	ACTA2,ACVRL1,AGTR1A,ANGPT1,ARTN,ATP2B4,BC034090,BRSK1,BRSK2,CACNB2,CADM4,CADPS,CASQ2,CAV1,CAV2,CDH2,CDH5,CNKSR2,CSPG4,DACT1,DACT3,DLG2,DLG4,DOCK4,EEF1A2,ESR1,FAM212B,FAM83D,FERMT2,FEZ1,FLNA,GDNF,GFAP,GJA1,GPRC5B,GRB14,GRIA1,HPCA,HSPB1,ITGB1,KCNA5,KCNQ3,LDHB,MAPK8IP1,MAPK8IP2,MAPT,MUSK,MYOM1,NCS1,NELL1,NELL2,NOL3,NPR1,NRP1,PAM,PDGFRB,PFKM,PIK3IP1,PITPNM3,PKIA,PLCB4,PPP1R12B,PPP1R12C,PPP1R9A,PRKAB2…
GO:MF	gap junction channel activity involved in cell communication by electrical coupling	GO:1903763	0.00921782	2.03537	7	1307	5	21091	GJA1,GJA5,GJC1,GJC2,GJD3
GO:MF	voltage-gated potassium channel activity involved in cardiac muscle cell action potential repolarization	GO:0086008	0.010612	1.9742	11	1307	6	21091	KCNA5,KCND3,KCNE4,KCNH2,KCNJ5,KCNJ8
GO:MF	calcium ion transmembrane transporter activity	GO:0015085	0.0120153	1.92026	133	1307	22	21091	ATP2B3,ATP2B4,CACNA1B,CACNA1C,CACNA1G,CACNA1H,CACNA2D3,CACNB1,CACNB2,CACNG4,CNR1,FAM155A,NCS1,PKD2,RYR2,SLC24A3,SLC8A1,SLC8A2,TRPC1,TRPC3,TRPC4,TRPC6
GO:MF	ion binding	GO:0043167	0.020678	1.68449	5944	1307	432	21091	AATK,ABCA8A,ABCA9,ABCC9,ABCG4,ABLIM2,ABLIM3,ACTA2,ACTG2,ACVRL1,ADAMDEC1,ADAMTS1,ADAMTS18,ADAMTS4,ADAMTS7,ADAMTS8,ADARB1,ADCY1,ADCY5,ADGRE1,ADGRL3,ADGRL4,AEBP1,AK4,ALDH1A3,ANTXR1,ANXA1,AOAH,AOC3,AOX1,APBA1,ARSI,ASPHD2,ASPN,ASTN2,ATL1,ATP10A,ATP1A2,ATP2B3,ATP2B4,AXL,B4GALT2,BCL6B,BNC2,BRSK1,BRSK2,BVES,C1RA,C1S1,CACNA1B,CACNA1C,CACNA2D3,CADPS,CALB2,CAMK1G,CAR11,CAR14,CASQ1,CASQ2,CCBE1,CD248,CD93,CDH…
GO:MF	procollagen-proline dioxygenase activity	GO:0019798	0.0233199	1.63227	8	1307	5	21091	P3H1,P3H2,P3H3,P4HA2,P4HTM
GO:MF	growth factor activity	GO:0008083	0.0245521	1.60991	149	1307	23	21091	ARTN,BMP4,BMP5,CERS1,CTGF,CXCL12,EFEMP1,FGF1,FGF13,FGF18,FGF2,FGF7,GDF10,GDNF,HGF,IGF1,NGF,OGN,PDGFD,PTN,TGFB2,TGFB3,VEGFB
GO:MF	myosin binding	GO:0017022	0.0255072	1.59334	75	1307	15	21091	AXL,CALD1,DMD,FXYD1,GRIA1,KIRREL,LARP6,LIMCH1,MYL9,NKD2,RAB3B,RAB3C,RAB6B,SHROOM4,SNAP25
GO:MF	calcium-dependent phospholipid binding	GO:0005544	0.0272057	1.56534	51	1307	12	21091	ANXA1,CPNE4,DOC2B,DYSF,RPH3A,SYT1,SYT13,SYT15,SYT17,SYT4,SYT6,SYT9
GO:MF	beta-catenin binding	GO:0008013	0.0313875	1.50324	85	1307	16	21091	APC2,CDH2,CDH5,CTNNA3,DACT1,ESR1,GJA1,GLI3,KANK1,NOS3,PTPRU,RORA,SALL1,SLC9A3R2,SOX17,TRPC4
GO:MF	ligand-gated ion channel activity	GO:0015276	0.0330414	1.48094	132	1307	21	21091	ASIC2,ASIC4,CHRNA3,CHRNA5,CNGA3,GABRB3,GLRB,GRIA1,GRIA3,GRIA4,GRIK3,HTR3A,HTR3B,KCNH2,KCNJ10,KCNJ12,KCNJ5,KCNJ8,P2RX6,PKD2,RYR2
GO:MF	protein domain specific binding	GO:0019904	0.0335426	1.4744	794	1307	77	21091	AFAP1L2,APBA1,ARHGAP6,ATP2B3,ATP2B4,CACNA1C,CACNB2,CADM1,CASKIN1,CLEC3B,DLC1,DLG2,DLG4,DMD,DNAJC6,DOCK4,DTNA,EFS,EHD2,ENAH,FGFR1,FN1,FZD1,FZD2,GATA2,GJA1,GJA5,GRIA1,GRIA3,HOXC4,HPCAL4,HSPA2,ICA1L,ITGB1,KCNAB1,KCNH2,KCNJ12,KHDRBS3,LDB2,LIN7B,MAPT,MPP2,MUSK,NEFL,NKD1,NOL3,PKD2,PLXNB3,PPP1R9A,PRKAR2B,RASSF9,RGS6,ROBO1,SCN5A,SDC2,SGIP1,SH3BGR,SHANK3,SHC4,SHISA6,SNAP25,SNCA,SNTB1,SNTG2,SORBS2,SPON1,ST…
GO:MF	SNARE binding	GO:0000149	0.0338611	1.4703	113	1307	19	21091	ABCC9,CAV1,CAV2,CPLX1,DAPK1,DOC2B,EXOC3L2,KCNB1,NAPB,SNAP25,SNCA,SYP,SYT1,SYT13,SYT15,SYT17,SYT4,SYT6,SYT9
GO:MF	scavenger receptor activity	GO:0005044	0.0383013	1.41679	45	1307	11	21091	ACKR3,ACKR4,CD163,COLEC12,FCRLS,LOXL2,LOXL4,SCARF2,SSC5D,TMPRSS5,VTN
GO:MF	enzyme binding	GO:0019899	0.0400854	1.39701	1988	1307	164	21091	ACTA2,ACVRL1,ADAMTS4,ADAMTSL4,ADCY5,ADCYAP1R1,AGTR1A,AKAP12,AKAP6,ANGPT1,ANK1,ANK2,APBB1,ARHGAP6,ARTN,ATP1B2,ATP2B4,BACE1,BAG2,BC034090,BDKRB2,BRSK1,BRSK2,CACNA1B,CACNA1C,CACNB2,CADM4,CADPS,CAP2,CASP12,CASQ2,CAV1,CAV2,CAV3,CCBE1,CDH2,CDH5,CHL1,CNKSR2,CNTNAP2,COL1A1,COL1A2,COL3A1,CSPG4,DACT1,DACT3,DLG2,DLG4,DMD,DOCK4,ECM1,EEF1A2,EIF4EBP1,ENO2,ESR1,F3,FAM212B,FAM83D,FBXL2,FERMT2,FEZ1,FGD1,FLNA,FLT4…
GO:MF	peptide hormone binding	GO:0017046	0.0407524	1.38985	53	1307	12	21091	ADCYAP1R1,CALCRL,EDNRB,GALR2,GCGR,GLP2R,IGF1R,LEPR,NPR1,NPR2,PTH1R,RAMP2
GO:MF	hormone binding	GO:0042562	0.0420399	1.37634	87	1307	16	21091	ADCYAP1R1,ALDH1A3,ATP1A2,CALCRL,CDH13,EDNRB,ESR1,GALR2,GCGR,GLP2R,IGF1R,LEPR,NPR1,NPR2,PTH1R,RAMP2
GO:MF	ligand-gated channel activity	GO:0022834	0.0461446	1.33588	135	1307	21	21091	ASIC2,ASIC4,CHRNA3,CHRNA5,CNGA3,GABRB3,GLRB,GRIA1,GRIA3,GRIA4,GRIK3,HTR3A,HTR3B,KCNH2,KCNJ10,KCNJ12,KCNJ5,KCNJ8,P2RX6,PKD2,RYR2
GO:MF	structural constituent of muscle	GO:0008307	0.0482982	1.31607	19	1307	7	21091	CSRP1,DMD,MYH11,MYL1,NEXN,PDLIM3,SYNM
GO:BP	system development	GO:0048731	1.11942e-75	74.951	4897	1294	594	21354	9330182L06RIK,ACKR3,ACTA2,ACTG2,ACVRL1,ADAM22,ADAMTS1,ADAMTS18,ADAMTS7,ADARB1,ADCY1,ADCYAP1,ADGRA2,ADGRB2,ADGRF5,ADGRG3,ADGRG6,ADGRL1,ADGRL3,ADRA2B,ADRA2C,AGTR1A,AK4,AKAP6,ALDH1A3,AMIGO1,AMOTL1,ANGPT1,ANGPTL1,ANGPTL2,ANK1,ANK2,ANTXR1,ANXA1,APBB1,APH1C,APLN,APLNR,APOD,APOLD1,ARHGAP44,ARHGEF15,ARHGEF9,ARTN,ASIC2,ASPN,ASTN1,ASTN2,ATL1,ATOH8,ATP1A2,ATP1B2,ATP2B4,AW551984,AXL,B4GALT2,BBS1,BBS7,BEND6,B…
GO:BP	multicellular organism development	GO:0007275	2.2881e-72	71.6405	5474	1294	630	21354	9330182L06RIK,ACKR3,ACTA2,ACTG2,ACVRL1,ADAM22,ADAMTS1,ADAMTS18,ADAMTS7,ADARB1,ADCY1,ADCYAP1,ADCYAP1R1,ADGRA2,ADGRB2,ADGRF5,ADGRG3,ADGRG6,ADGRL1,ADGRL3,ADRA2B,ADRA2C,AGTR1A,AK4,AKAP6,ALDH1A3,AMIGO1,AMOTL1,ANGPT1,ANGPTL1,ANGPTL2,ANK1,ANK2,ANTXR1,ANXA1,APBA1,APBB1,APH1C,APLN,APLNR,APOD,APOLD1,ARHGAP44,ARHGEF15,ARHGEF9,ARTN,ASIC2,ASPN,ASTN1,ASTN2,ATL1,ATOH8,ATP1A2,ATP1B2,ATP2B4,AW551984,AXL,B4GALT2,B…
GO:BP	anatomical structure development	GO:0048856	7.17065e-68	67.1444	6028	1294	660	21354	9330182L06RIK,ACKR3,ACTA2,ACTG2,ACVRL1,ADAM22,ADAMTS1,ADAMTS18,ADAMTS7,ADAMTSL4,ADARB1,ADCY1,ADCYAP1,ADCYAP1R1,ADGRA2,ADGRB2,ADGRF5,ADGRG3,ADGRG6,ADGRL1,ADGRL3,ADRA2B,ADRA2C,AGTR1A,AK4,AKAP6,ALDH1A3,AMIGO1,AMOTL1,ANGPT1,ANGPTL1,ANGPTL2,ANK1,ANK2,ANTXR1,ANXA1,APBA1,APBB1,APH1C,APLN,APLNR,APOD,APOLD1,ARHGAP44,ARHGEF15,ARHGEF9,ARTN,ASIC2,ASPN,ASTN1,ASTN2,ATL1,ATOH8,ATP1A2,ATP1B2,ATP2B4,AW551984,AXL,…
GO:BP	developmental process	GO:0032502	4.09427e-63	62.3878	6586	1294	688	21354	9330182L06RIK,ACKR3,ACTA2,ACTG2,ACVRL1,ADAM22,ADAMTS1,ADAMTS18,ADAMTS7,ADAMTSL4,ADARB1,ADCY1,ADCYAP1,ADCYAP1R1,ADGRA2,ADGRB2,ADGRF5,ADGRG3,ADGRG6,ADGRL1,ADGRL3,ADRA2B,ADRA2C,AGTR1A,AK4,AKAP6,ALDH1A3,AMIGO1,AMOTL1,ANGPT1,ANGPTL1,ANGPTL2,ANK1,ANK2,ANTXR1,ANXA1,APBA1,APBB1,APH1C,APLN,APLNR,APOD,APOLD1,ARHGAP44,ARHGEF15,ARHGEF9,ARTN,ASIC2,ASPN,ASTN1,ASTN2,ATL1,ATOH8,ATP1A2,ATP1B2,ATP2B4,AW551984,AXL,…
GO:BP	anatomical structure morphogenesis	GO:0009653	6.49324e-63	62.1875	2730	1294	392	21354	ACKR3,ACTA2,ACTG2,ACVRL1,ADAMTS1,ADARB1,ADCY1,ADGRA2,ADGRB2,ADGRF5,ADGRG6,AGTR1A,ALDH1A3,AMIGO1,AMOTL1,ANGPT1,ANGPTL1,ANGPTL2,ANK2,ANTXR1,ANXA1,APBB1,APLN,APLNR,APOLD1,ARHGAP44,ARHGEF15,ARTN,ASPN,ASTN2,ATL1,ATOH8,ATP2B4,AXL,BBS1,BMP4,BMP5,BMPER,BOC,BRSK1,BRSK2,BVES,C3AR1,C5AR1,C6,CACNA1C,CADM1,CALCRL,CAP2,CASQ1,CASQ2,CAV1,CAV3,CC2D2A,CCBE1,CCDC141,CCM2L,CD109,CD248,CDC42EP3,CDH11,CDH13,CDH19,CDH2…
GO:BP	regulation of localization	GO:0032879	3.68262e-56	55.4338	2861	1294	390	21354	ACKR3,ACTA2,ACVRL1,ADAMTS1,ADARB1,ADCY1,ADCY5,ADCYAP1,ADCYAP1R1,ADGRA2,ADGRG3,AGTR1A,AKAP12,AKAP6,AMIGO1,AMOTL1,ANGPT1,ANK2,ANXA1,AOC3,APBA1,APBB1,APLN,APLNR,APOD,ARHGAP44,ASIC2,ASTN2,ATOH8,ATP1A2,ATP1B2,ATP2B4,AXL,BACE1,BBS1,BC034090,BMP4,BMPER,BRSK2,BVES,C1QTNF2,C1QTNF3,C3AR1,C5AR1,CACNA1B,CACNA1C,CACNA1G,CACNA2D3,CACNB1,CACNB2,CACNG4,CADM4,CADPS,CALY,CASQ1,CASQ2,CAV1,CAV2,CAV3,CCBE1,CCDC65,CD2…
GO:BP	nervous system development	GO:0007399	1.40739e-50	49.8516	2430	1294	341	21354	9330182L06RIK,ADAM22,ADAMTS1,ADARB1,ADCY1,ADCYAP1,ADGRA2,ADGRB2,ADGRG6,ADGRL1,ADGRL3,ADRA2B,ADRA2C,AK4,ALDH1A3,AMIGO1,ANK2,ANXA1,APBB1,APOD,ARHGAP44,ARHGEF15,ARHGEF9,ARTN,ASIC2,ASTN1,ASTN2,ATL1,ATOH8,ATP1A2,ATP1B2,ATP2B4,AXL,B4GALT2,BBS1,BBS7,BEND6,BMP4,BMP5,BOC,BRSK1,BRSK2,C5AR1,CADM1,CAV1,CBLN2,CC2D2A,CCDC141,CDH11,CDH2,CDKL5,CERS1,CFH,CHL1,CHN1,CHODL,CHRD,CHRDL1,CHRNA3,CLSTN2,CLSTN3,CNGA3,CNR1…
GO:BP	circulatory system development	GO:0072359	5.10453e-48	47.292	1170	1294	215	21354	ACKR3,ACTA2,ACVRL1,ADAMTS1,ADGRA2,ADGRB2,ADGRF5,ADGRG6,AGTR1A,AKAP6,AMOTL1,ANGPT1,ANGPTL1,ANGPTL2,ANTXR1,ANXA1,APLN,APLNR,APOLD1,ARHGEF15,ATP2B4,AW551984,BBS7,BMP4,BMP5,BMPER,BVES,C3AR1,C5AR1,C6,CACNA1C,CALCRL,CAV1,CAV3,CC2D2A,CCBE1,CCM2L,CDH13,CDH2,CDH5,CFH,CLEC14A,COL14A1,COL18A1,COL1A1,COL1A2,COL3A1,COL5A1,COL8A1,COL8A2,CSPG4,CTGF,CX3CR1,CXCL12,CYP1B1,DCHS1,DCN,DYSF,ECM1,EDNRA,EFEMP2,EMILIN1,E…
GO:BP	cell-cell signaling	GO:0007267	5.63606e-42	41.249	1501	1294	238	21354	ADARB1,ADCY1,ADCY5,ADCYAP1,ADGRA2,AGTR1A,AKAP12,AMOTL1,ANK2,ANXA1,APBA1,APC2,APLN,BACE1,BMP4,BRSK1,BRSK2,C1QTNF3,CACNA1B,CACNA1C,CACNA1G,CACNB1,CACNB2,CACNG4,CADM1,CADPS,CALB2,CAV1,CAV2,CBLN2,CDH11,CDH2,CDH3,CELF4,CELF6,CHRM2,CHRNA3,CHRNA5,CLSTN2,CLSTN3,CNR1,COL1A1,CPEB1,CPLX1,CX3CR1,CXCL12,DAAM2,DAB2,DACT1,DACT3,DGKB,DHH,DKK2,DKK3,DLG2,DLG4,DMPK,DOC2B,DRP2,DTNA,EDA,EFNA5,ELAVL4,ENHO,F2R,FAM107A,…
GO:BP	animal organ development	GO:0048513	1.35765e-41	40.8672	3628	1294	420	21354	ACTA2,ACTG2,ACVRL1,ADAMTS1,ADAMTS18,ADAMTS7,ADARB1,ADCY1,ADCYAP1,ADGRF5,ADGRG3,ADGRG6,ADGRL3,AGTR1A,AK4,AKAP6,ALDH1A3,AMIGO1,ANGPT1,ANK1,ANXA1,APH1C,APLN,APLNR,APOD,ARHGEF15,ARTN,ASPN,ATP1A2,ATP1B2,ATP2B4,AW551984,AXL,B4GALT2,BBS1,BBS7,BGN,BMP4,BMP5,BMPER,BNC2,BVES,C3AR1,C5AR1,CACNA1C,CADM1,CALCRL,CASQ1,CAV1,CAV2,CAV3,CC2D2A,CCBE1,CCDC141,CCM2L,CD109,CD248,CDH2,CDH3,CELF4,CERS1,CFH,CFL2,CHADL,CHR…
GO:BP	tissue development	GO:0009888	2.74153e-41	40.562	1963	1294	280	21354	9330182L06RIK,ACTA2,ACTG2,ACVRL1,ADAMTS7,ADAMTSL4,ADARB1,AGTR1A,AKAP6,ALDH1A3,ANGPT1,ANXA1,APOD,APOLD1,ARTN,ASPN,ASTN2,ATOH8,AW551984,BBS1,BGN,BMP4,BMP5,BMPER,BNC2,BRSK1,BRSK2,BVES,C3AR1,CASQ1,CAV1,CAV2,CAV3,CC2D2A,CCM2L,CD109,CDH2,CDH3,CDH5,CERS1,CFH,CFL2,CHADL,CHRD,CLEC3B,COL12A1,COL14A1,COL18A1,COL1A1,COL1A2,COL3A1,COL5A1,COL5A2,COL6A1,COL8A1,CSRP1,CTGF,CXCL12,CYP1B1,CYP7B1,CYTL1,DAB2,DACT1,DA…
GO:BP	localization	GO:0051179	2.84357e-41	40.5461	6190	1294	606	21354	ABCA8A,ABCA9,ABCC9,ABCG4,ACKR3,ACKR4,ACTA2,ACVRL1,ADAM22,ADAMTS1,ADARB1,ADCY1,ADCY5,ADCYAP1,ADCYAP1R1,ADGRA2,ADGRG3,ADGRL3,AGTR1A,AKAP12,AKAP6,AMIGO1,AMOTL1,ANGPT1,ANK1,ANK2,ANO2,ANTXR1,ANXA1,AOC3,AP3B2,APBA1,APBB1,APLN,APLNR,APOD,APOL10B,APOL7C,APOLD1,ARHGAP44,ARHGEF9,ARMCX3,ARTN,ASIC2,ASIC4,ASTN1,ASTN2,ATOH8,ATP10A,ATP1A2,ATP1B2,ATP2B3,ATP2B4,AXL,BACE1,BBS1,BBS7,BC034090,BDKRB2,BMP4,BMPER,BRSK1…
GO:BP	tube morphogenesis	GO:0035239	1.63275e-40	39.7871	916	1294	175	21354	ACKR3,ACVRL1,ADAMTS1,ADGRA2,ADGRB2,ADGRF5,AGTR1A,AMOTL1,ANGPT1,ANGPTL1,ANGPTL2,ANXA1,APLN,APLNR,APOLD1,ATOH8,ATP2B4,BMP4,BMP5,BMPER,C3AR1,C5AR1,C6,CALCRL,CAV1,CAV3,CC2D2A,CCBE1,CDH13,CDH2,CDH5,CFH,CLEC14A,COL18A1,COL3A1,COL8A1,COL8A2,CSPG4,CTGF,CX3CR1,CXCL12,CYP1B1,DACT1,DCHS1,DCN,DYSF,ECM1,EDA,EDAR,EDNRA,EMILIN1,ENAH,ENG,EPHA7,EPN2,EPOR,ESR1,F3,FAT4,FBLN5,FGF1,FGF18,FGF2,FGFR1,FKBP10,FLNA,FLT1,F…
GO:BP	multicellular organismal process	GO:0032501	1.74828e-40	39.7574	8531	1294	757	21354	9330182L06RIK,ABCC9,ACKR3,ACTA2,ACTG2,ACVRL1,ADAM22,ADAMTS1,ADAMTS18,ADAMTS7,ADARB1,ADCY1,ADCY5,ADCYAP1,ADCYAP1R1,ADGRA2,ADGRB2,ADGRF5,ADGRG3,ADGRG6,ADGRL1,ADGRL3,ADRA2B,ADRA2C,AFAP1L2,AGTR1A,AK4,AKAP12,AKAP6,ALDH1A3,AMIGO1,AMOTL1,ANGPT1,ANGPTL1,ANGPTL2,ANK1,ANK2,ANTXR1,ANXA1,AOC3,APBA1,APBB1,APH1C,APLN,APLNR,APOD,APOLD1,ARHGAP44,ARHGEF15,ARHGEF9,ARTN,ASIC2,ASIC4,ASPN,ASTN1,ASTN2,ATL1,ATOH8,ATP1A…
GO:BP	cell adhesion	GO:0007155	6.06267e-40	39.2173	1377	1294	222	21354	ACKR3,ACVRL1,ADAMTS18,ADGRL1,ADGRL3,AMIGO1,ANGPT1,ANTXR1,ANXA1,AOC3,APOD,ARHGAP6,ASTN1,ASTN2,ATP1B2,AXL,BMP4,BMP5,BVES,CADM1,CADM3,CADM4,CAV1,CCDC141,CCM2L,CD200,CD93,CD99L2,CDH11,CDH13,CDH19,CDH2,CDH3,CDH5,CDH6,CERCAM,CFH,CHL1,CHRD,CLSTN2,CLSTN3,CNTN1,CNTN5,CNTNAP2,CNTNAP5A,COL12A1,COL14A1,COL16A1,COL18A1,COL1A1,COL28A1,COL3A1,COL5A1,COL5A3,COL6A1,COL6A2,COL6A3,COL6A4,COL8A1,COL8A2,COLEC10,CTGF,…
GO:BP	tube development	GO:0035295	2.27426e-39	38.6432	1140	1294	197	21354	ACKR3,ACVRL1,ADAMTS1,ADGRA2,ADGRB2,ADGRF5,AGTR1A,AMOTL1,ANGPT1,ANGPTL1,ANGPTL2,ANXA1,APLN,APLNR,APOLD1,ATOH8,ATP2B4,BMP4,BMP5,BMPER,C3AR1,C5AR1,C6,CALCRL,CAV1,CAV3,CC2D2A,CCBE1,CDH13,CDH2,CDH5,CFH,CLEC14A,CLMP,COL18A1,COL3A1,COL8A1,COL8A2,CRISPLD2,CSPG4,CTGF,CX3CR1,CXCL12,CYP1B1,DACT1,DCHS1,DCN,DYSF,DZIP1L,ECM1,EDA,EDAR,EDNRA,EDNRB,EIF4EBP1,EMILIN1,ENAH,ENG,EPHA7,EPN2,EPOR,ESR1,F3,FAT4,FBLN5,FGF1…
GO:BP	biological adhesion	GO:0022610	2.56241e-39	38.5914	1389	1294	222	21354	ACKR3,ACVRL1,ADAMTS18,ADGRL1,ADGRL3,AMIGO1,ANGPT1,ANTXR1,ANXA1,AOC3,APOD,ARHGAP6,ASTN1,ASTN2,ATP1B2,AXL,BMP4,BMP5,BVES,CADM1,CADM3,CADM4,CAV1,CCDC141,CCM2L,CD200,CD93,CD99L2,CDH11,CDH13,CDH19,CDH2,CDH3,CDH5,CDH6,CERCAM,CFH,CHL1,CHRD,CLSTN2,CLSTN3,CNTN1,CNTN5,CNTNAP2,CNTNAP5A,COL12A1,COL14A1,COL16A1,COL18A1,COL1A1,COL28A1,COL3A1,COL5A1,COL5A3,COL6A1,COL6A2,COL6A3,COL6A4,COL8A1,COL8A2,COLEC10,CTGF,…
GO:BP	movement of cell or subcellular component	GO:0006928	7.00754e-39	38.1544	2087	1294	286	21354	ACKR3,ACKR4,ACTA2,ACVRL1,ADAMTS1,ADARB1,ADGRA2,ADGRG3,ADGRL3,AGTR1A,AKAP12,AKAP6,AMOTL1,ANGPT1,ANK2,ANXA1,AOC3,AP3B2,APBB1,APOD,ARMCX3,ARTN,ASTN1,ASTN2,ATOH8,ATP1A2,ATP1B2,ATP2B4,AXL,BBS1,BMP4,BMPER,BOC,BVES,C3AR1,C5AR1,CACNA1C,CACNA1G,CACNA1H,CACNB2,CADM1,CADM4,CALY,CASQ2,CAV1,CAV3,CCBE1,CCDC141,CCDC65,CD248,CD99L2,CDH13,CDH2,CDH5,CDKL5,CFL2,CHL1,CHN1,CHRD,CLEC14A,CNTN5,COL18A1,COL1A1,COL3A1,COL…
GO:BP	vasculature development	GO:0001944	1.20268e-38	37.9199	774	1294	156	21354	ACKR3,ACTA2,ACVRL1,ADAMTS1,ADGRA2,ADGRB2,ADGRF5,AGTR1A,AMOTL1,ANGPT1,ANGPTL1,ANGPTL2,ANTXR1,ANXA1,APLN,APLNR,APOLD1,ARHGEF15,ATP2B4,BMP4,BMPER,C3AR1,C5AR1,C6,CALCRL,CAV1,CCBE1,CDH13,CDH2,CDH5,CFH,CLEC14A,COL18A1,COL1A1,COL1A2,COL3A1,COL5A1,COL8A1,COL8A2,CSPG4,CTGF,CX3CR1,CXCL12,CYP1B1,DCN,DYSF,ECM1,EDNRA,EFEMP2,EMILIN1,ENG,EPN2,EPOR,F3,FBLN5,FGF1,FGF18,FGF2,FGFR1,FKBP10,FLNA,FLT1,FLT4,FN1,FOXF1,G…
GO:BP	regulation of multicellular organismal process	GO:0051239	3.5085e-38	37.4549	2773	1294	343	21354	9330182L06RIK,ABCC9,ACVRL1,ADAMTS1,ADAMTS18,ADAMTS7,ADCYAP1,ADGRA2,ADGRB2,ADGRL1,ADGRL3,ADRA2B,ADRA2C,AFAP1L2,AGTR1A,AKAP12,AKAP6,AMIGO1,AMOTL1,ANGPT1,ANK2,ANXA1,APLN,APLNR,APOD,APOLD1,ASIC2,ASPN,ATOH8,ATP1A2,ATP2B4,AXL,BCL6B,BMP4,BMPER,BVES,C1QTNF3,C3AR1,C5AR1,C6,CACNA1B,CACNA1C,CACNA1G,CACNB2,CACNG4,CALCRL,CALD1,CASQ1,CASQ2,CAV1,CAV3,CBLN2,CCBE1,CCM2L,CD109,CD200,CDH2,CDH3,CDH5,CDKL5,CELF4,CHAD…
GO:BP	regulation of cell communication	GO:0010646	1.63375e-37	36.7868	3250	1294	380	21354	9330182L06RIK,ACKR3,ACTA2,ACVRL1,ADCY1,ADCY5,ADCYAP1,ADCYAP1R1,ADGRA2,ADGRG3,ADRA2B,ADRA2C,AFAP1L2,AGTR1A,AKAP12,AKAP6,ALDH1A3,ANGPT1,ANK2,ANXA1,APBA1,APC2,APLN,APLNR,APOD,ARHGAP44,ARHGEF25,ASPN,ATP2B4,AXL,BACE1,BDKRB2,BEND6,BMP4,BMP5,BMPER,BRSK1,BRSK2,C1QTNF2,C1QTNF3,C5AR1,CACNA1B,CACNB2,CACNG4,CADM4,CALB2,CASQ2,CAV1,CAV2,CAV3,CCBE1,CCDC3,CD109,CDH11,CDH13,CDH2,CDH3,CDH5,CELF4,CERS1,CHN1,CHRD,CH…
GO:BP	regulation of signaling	GO:0023051	1.68362e-37	36.7738	3263	1294	381	21354	9330182L06RIK,ACKR3,ACTA2,ACVRL1,ADCY1,ADCY5,ADCYAP1,ADCYAP1R1,ADGRA2,ADGRG3,ADRA2B,ADRA2C,AFAP1L2,AGTR1A,AKAP12,AKAP6,ALDH1A3,ANGPT1,ANK2,ANXA1,APBA1,APC2,APLN,APLNR,APOD,ARHGAP44,ARHGEF25,ASPN,ATP2B4,AXL,BACE1,BDKRB2,BEND6,BMP4,BMP5,BMPER,BRSK1,BRSK2,BVES,C1QTNF2,C1QTNF3,C5AR1,CACNA1B,CACNB2,CACNG4,CADM4,CALB2,CAV1,CAV2,CAV3,CCBE1,CCDC3,CD109,CDH11,CDH13,CDH2,CDH3,CDH5,CELF4,CERS1,CHN1,CHRD,CHR…
GO:BP	blood vessel development	GO:0001568	4.24582e-37	36.372	743	1294	150	21354	ACKR3,ACTA2,ACVRL1,ADAMTS1,ADGRA2,ADGRB2,ADGRF5,AGTR1A,AMOTL1,ANGPT1,ANGPTL1,ANGPTL2,ANTXR1,ANXA1,APLN,APLNR,APOLD1,ATP2B4,BMP4,BMPER,C3AR1,C5AR1,C6,CALCRL,CAV1,CCBE1,CDH13,CDH2,CDH5,CFH,CLEC14A,COL18A1,COL1A1,COL1A2,COL3A1,COL5A1,COL8A1,COL8A2,CSPG4,CTGF,CX3CR1,CXCL12,CYP1B1,DCN,DYSF,ECM1,EDNRA,EFEMP2,EMILIN1,ENG,EPN2,EPOR,F3,FBLN5,FGF1,FGF18,FGF2,FGFR1,FKBP10,FLNA,FLT1,FLT4,FN1,FOXF1,GATA2,GJA1…
GO:BP	locomotion	GO:0040011	5.14011e-35	34.289	1845	1294	256	21354	ACKR3,ACKR4,ACTA2,ACVRL1,ADAMTS1,ADARB1,ADGRA2,ADGRG3,ADGRL3,AGTR1A,AKAP12,AMOTL1,ANGPT1,ANXA1,AOC3,APBB1,APOD,ARTN,ASTN1,ASTN2,ATOH8,ATP1A2,ATP1B2,ATP2B4,AXL,BBS1,BMP4,BMPER,BOC,BVES,C3AR1,C5AR1,CACNA1H,CADM1,CADM4,CAV1,CCBE1,CCDC141,CCDC65,CD248,CD99L2,CDH13,CDH2,CDH5,CDKL5,CFL2,CHL1,CHN1,CHRD,CLEC14A,CMTM5,CNTN5,COL18A1,COL1A1,COL3A1,COL5A1,COLEC10,CPEB1,CSPG4,CTGF,CTNNA2,CX3CR1,CXCL12,CXCL14,…
GO:BP	cell differentiation	GO:0030154	8.03815e-35	34.0948	4404	1294	461	21354	ACKR3,ACTA2,ACVRL1,ADAM22,ADAMTS1,ADAMTS7,ADAMTSL4,ADARB1,ADCY1,ADCYAP1,ADCYAP1R1,ADGRA2,ADGRF5,ADGRG3,ADGRG6,ADGRL3,ADRA2B,ADRA2C,AKAP6,AMIGO1,ANGPT1,ANK1,ANK2,ANTXR1,ANXA1,APBB1,APLNR,APOD,APOLD1,ARHGAP44,ARTN,ASTN1,ASTN2,ATL1,ATOH8,ATP1B2,AW551984,AXL,BBS1,BBS7,BCL6B,BEND6,BMP4,BMP5,BOC,BRSK1,BRSK2,BVES,C5AR1,CADM1,CASQ1,CASQ2,CAV1,CAV2,CAV3,CCDC141,CCDC3,CD109,CDH11,CDH2,CDH3,CDH5,CDKL5,CFH,C…
GO:BP	cellular developmental process	GO:0048869	1.55719e-34	33.8077	4483	1294	466	21354	ACKR3,ACTA2,ACVRL1,ADAM22,ADAMTS1,ADAMTS7,ADAMTSL4,ADARB1,ADCY1,ADCYAP1,ADCYAP1R1,ADGRA2,ADGRF5,ADGRG3,ADGRG6,ADGRL3,ADRA2B,ADRA2C,AKAP6,AMIGO1,ANGPT1,ANK1,ANK2,ANTXR1,ANXA1,APBB1,APLNR,APOD,APOLD1,ARHGAP44,ARTN,ASTN1,ASTN2,ATL1,ATOH8,ATP1B2,AW551984,AXL,BBS1,BBS7,BCL6B,BEND6,BMP4,BMP5,BOC,BRSK1,BRSK2,BVES,C5AR1,CADM1,CASQ1,CASQ2,CAV1,CAV2,CAV3,CCDC141,CCDC3,CD109,CDH11,CDH2,CDH3,CDH5,CDKL5,CFH,C…
GO:BP	anatomical structure formation involved in morphogenesis	GO:0048646	3.30905e-34	33.4803	1174	1294	191	21354	ACKR3,ACVRL1,ADAMTS1,ADGRA2,ADGRB2,ADGRG6,AGTR1A,ALDH1A3,AMOTL1,ANGPT1,ANGPTL1,ANGPTL2,ANK2,ANXA1,APLN,APLNR,APOLD1,ATOH8,ATP2B4,BMP4,BMP5,BMPER,C3AR1,C5AR1,C6,CALCRL,CASQ1,CASQ2,CAV1,CAV3,CC2D2A,CCBE1,CD109,CDH13,CDH5,CFH,CFL2,CHRD,CLEC14A,COL12A1,COL18A1,COL1A1,COL5A1,COL5A2,COL6A1,COL8A1,COL8A2,CSPG4,CSRP1,CTGF,CX3CR1,CXCL12,CYP1B1,DCHS1,DCN,DYSF,ECM1,EDA,EDAR,EDNRA,EHD2,EMILIN1,ENAH,ENG,EPN2,…
GO:BP	cell surface receptor signaling pathway	GO:0007166	4.56184e-34	33.3409	2688	1294	326	21354	9330182L06RIK,ACKR1,ACKR3,ACKR4,ACVRL1,ADAM22,ADCY5,ADCYAP1R1,ADGRA2,ADGRB2,ADGRE1,ADGRF5,ADGRG3,ADGRG6,ADGRL1,ADGRL3,ADGRL4,AFAP1L2,AGTR1A,AMOTL1,ANGPT1,ANGPTL1,ANXA1,APC2,APH1C,APLN,APOD,ARTN,ASPN,ATOH8,AXL,BBS7,BEND6,BMP4,BMP5,BMPER,BOC,C3AR1,C5AR1,CADM4,CALCRL,CAV1,CAV2,CAV3,CC2D2A,CCBE1,CCDC3,CD109,CDH13,CDH2,CDH3,CDH5,CDH6,CELF4,CERS1,CHN1,CHRD,CHRDL1,CHRNA3,CHRNA5,CIDEA,CLEC14A,CNTFR,CNTN1…
GO:BP	regulation of cellular component movement	GO:0051270	1.4615e-33	32.8352	1077	1294	180	21354	ACKR3,ACTA2,ACVRL1,ADAMTS1,ADARB1,ADGRA2,ADGRG3,AKAP12,AKAP6,AMOTL1,ANGPT1,ANK2,ANXA1,AOC3,APOD,ATOH8,ATP1A2,ATP1B2,ATP2B4,BBS1,BMP4,BMPER,C3AR1,C5AR1,CACNA1C,CADM4,CALY,CASQ2,CAV1,CAV3,CCBE1,CCDC65,CD99L2,CDH13,CDH5,CHRD,COL18A1,COL1A1,COL3A1,CPEB1,CTNNA2,CTNNA3,CX3CR1,CXCL12,CXCL14,CYGB,CYP1B1,DAB2,DCN,DDR2,DLC1,DMTN,DOCK4,DYSF,ECM1,EDNRA,EFEMP1,EMILIN1,ENG,F2R,FAM107A,FERMT2,FEZ1,FGF1,FGF13,FG…
GO:BP	blood vessel morphogenesis	GO:0048514	1.95807e-33	32.7082	646	1294	133	21354	ACKR3,ACVRL1,ADAMTS1,ADGRA2,ADGRB2,ADGRF5,AGTR1A,AMOTL1,ANGPT1,ANGPTL1,ANGPTL2,ANXA1,APLN,APLNR,APOLD1,ATP2B4,BMP4,BMPER,C3AR1,C5AR1,C6,CALCRL,CAV1,CCBE1,CDH13,CDH2,CDH5,CFH,CLEC14A,COL18A1,COL3A1,COL8A1,COL8A2,CSPG4,CTGF,CX3CR1,CXCL12,CYP1B1,DCN,DYSF,ECM1,EDNRA,EMILIN1,ENG,EPN2,EPOR,F3,FBLN5,FGF1,FGF18,FGF2,FGFR1,FKBP10,FLNA,FLT1,FLT4,FN1,FOXF1,GATA2,GJA1,GJA5,GJC1,GPR4,GREM1,HAND1,HAND2,HAS2,HE…
GO:BP	regulation of biological quality	GO:0065008	2.12381e-33	32.6729	3934	1294	422	21354	ACKR3,ACKR4,ACTA2,ACVRL1,ADAM22,ADAMTS18,ADCY1,ADCY5,ADCYAP1,ADCYAP1R1,ADGRB2,ADGRF5,ADGRL1,ADGRL3,ADRA2B,ADRA2C,AGTR1A,AKAP12,AKAP6,ALDH1A3,AMIGO1,ANGPT1,ANK1,ANK2,ANXA1,AOC3,APBA1,APBB1,APLN,APLNR,ARHGAP44,ARHGEF15,ARMCX1,ASIC2,ATP10A,ATP1A2,ATP1B2,ATP2B3,ATP2B4,AXL,BACE1,BAG2,BBS1,BDKRB2,BMP4,BMP5,BRSK1,BRSK2,BVES,C1QTNF3,C1QTNF9,C3AR1,C5AR1,C7,CACNA1B,CACNA1C,CACNA1G,CACNA1H,CACNB2,CACNG4,CAD…
GO:BP	cell migration	GO:0016477	1.60069e-32	31.7957	1499	1294	219	21354	ACKR3,ACKR4,ACTA2,ACVRL1,ADAMTS1,ADARB1,ADGRA2,ADGRG3,ADGRL3,AGTR1A,AKAP12,AMOTL1,ANGPT1,ANXA1,AOC3,APBB1,APOD,ARTN,ASTN1,ASTN2,ATOH8,ATP1B2,ATP2B4,AXL,BBS1,BMP4,BMPER,BVES,C3AR1,C5AR1,CADM1,CAV1,CCBE1,CCDC141,CD248,CD99L2,CDH13,CDH2,CDH5,CDKL5,CHL1,CHRD,CLEC14A,COL18A1,COL1A1,COL3A1,COL5A1,CPEB1,CSPG4,CTGF,CTNNA2,CX3CR1,CXCL12,CXCL14,CYGB,CYP1B1,CYP7B1,DAB2,DBH,DCHS1,DCN,DDR2,DLC1,DMTN,DOCK4,DYS…
GO:BP	cell development	GO:0048468	1.67166e-32	31.7769	2361	1294	295	21354	ACTA2,ADAM22,ADAMTS1,ADAMTSL4,ADARB1,ADCY1,ADCYAP1,ADGRA2,ADGRF5,ADGRG6,AKAP6,AMIGO1,ANK1,ANK2,ANTXR1,APBB1,APOD,ARHGAP44,ARTN,ATL1,ATP1B2,AXL,BBS1,BMP4,BMP5,BOC,BRSK1,BRSK2,BVES,C5AR1,CASQ1,CASQ2,CAV2,CAV3,CCDC141,CDH11,CDH2,CDH5,CDKL5,CFH,CFL2,CHL1,CHN1,CHODL,CHRNA3,CNGA3,CNR1,CNTN1,CNTN5,CNTNAP2,COL14A1,COL18A1,CPEB1,CRTAC1,CSPG4,CSRP1,CTNNA2,CX3CR1,CXCL12,DAAM2,DACT1,DHH,DLG2,DLG4,DMD,DMTN,DN…
GO:BP	regulation of transport	GO:0051049	2.301e-32	31.6381	1866	1294	252	21354	ADCY1,ADCY5,ADCYAP1,ADCYAP1R1,AGTR1A,AKAP6,AMIGO1,ANGPT1,ANK2,ANXA1,AOC3,APBA1,APBB1,APLN,APLNR,APOD,ARHGAP44,ASIC2,ATP1A2,ATP1B2,ATP2B4,AXL,BACE1,BMP4,BRSK2,BVES,C1QTNF2,C1QTNF3,CACNA1B,CACNA1C,CACNA1G,CACNA2D3,CACNB1,CACNB2,CACNG4,CADPS,CALY,CASQ1,CASQ2,CAV1,CAV3,CD200,CDH13,CDH2,CDH3,CHRM2,CHRNA3,CHRNA5,CLIP3,CNR1,CNTN1,CPLX1,CRYAB,CXCL12,DAB2,DAPK1,DLG4,DMD,DMPK,DMTN,DNAJC6,DOC2B,DPP6,DYSF,ED…
GO:BP	neurogenesis	GO:0022008	6.34532e-32	31.1975	1776	1294	243	21354	ADAM22,ADAMTS1,ADARB1,ADCY1,ADCYAP1,ADGRG6,ADGRL3,ADRA2B,ADRA2C,AMIGO1,ANXA1,APBB1,APOD,ARHGAP44,ARTN,ASTN1,ASTN2,ATL1,ATOH8,ATP1B2,AXL,BBS1,BEND6,BMP4,BMP5,BOC,BRSK1,BRSK2,C5AR1,CAV1,CCDC141,CDH11,CDH2,CDKL5,CFH,CHL1,CHN1,CHODL,CHRDL1,CHRNA3,CNGA3,CNR1,CNTN1,CNTN5,CNTNAP2,COL3A1,CPEB1,CRTAC1,CSPG4,CTNNA2,CX3CR1,CXCL12,DAAM2,DACT1,DCHS1,DLG2,DLG4,DMD,DNER,EDNRB,EFEMP1,EFNA5,ELAVL4,EML1,ENAH,EPHA7…
GO:BP	animal organ morphogenesis	GO:0009887	1.49601e-31	30.8251	1045	1294	173	21354	ACTA2,ACTG2,ACVRL1,ADAMTS1,ADARB1,ADGRG6,AGTR1A,ALDH1A3,ANGPT1,ASPN,BBS1,BMP4,BMP5,CAV1,CAV3,CCM2L,CDH2,CFH,CNGA3,COL1A1,COL1A2,COL3A1,COL5A1,COL5A2,COL8A1,COL8A2,CTGF,CTNNA2,CYP7B1,DAB2,DACT1,DCHS1,EDA,EDAR,EDNRA,EFEMP1,EGFLAM,ENG,EPOR,ESR1,FAT4,FBN1,FGF1,FGF18,FGF2,FGF7,FGFR1,FGFR2,FJX1,FLNA,FLRT2,FOXF1,FOXF2,FOXP2,FRZB,FZD1,FZD2,GAS1,GATA2,GDNF,GJA1,GJA5,GLI2,GLI3,GNAO1,GPC3,GREM1,GREM2,HAND1,…
GO:BP	extracellular matrix organization	GO:0030198	1.15641e-30	29.9369	289	1294	83	21354	ADAMTS1,ADAMTS18,ADAMTS4,ADAMTS7,ADAMTSL1,ADAMTSL3,ADAMTSL4,AEBP1,ANTXR1,APBB1,CAV1,CAV2,CHADL,COL14A1,COL16A1,COL18A1,COL1A1,COL1A2,COL23A1,COL28A1,COL3A1,COL4A5,COL5A1,COL5A2,COL5A3,COL6A4,COL8A1,COL8A2,CRISPLD2,CRTAP,CTGF,CYP1B1,DDR2,DPT,ECM2,EFEMP2,EGFLAM,EMILIN1,ENG,FBLN2,FBLN5,FKBP10,FLRT2,FN1,FOXF1,FOXF2,GFAP,GREM1,HAS2,HPSE2,ITGA8,ITGB1,KAZALD1,LAMB1,LAMB2,LOXL2,LOXL4,LTBP3,LUM,MFAP4,MMP1…
GO:BP	localization of cell	GO:0051674	1.61206e-30	29.7926	1655	1294	229	21354	ACKR3,ACKR4,ACTA2,ACVRL1,ADAMTS1,ADARB1,ADGRA2,ADGRG3,ADGRL3,AGTR1A,AKAP12,AMOTL1,ANGPT1,ANXA1,AOC3,APBB1,APOD,ARTN,ASTN1,ASTN2,ATOH8,ATP1B2,ATP2B4,AXL,BBS1,BMP4,BMPER,BVES,C3AR1,C5AR1,CACNA1H,CADM1,CADM4,CAV1,CCBE1,CCDC141,CCDC65,CD248,CD99L2,CDH13,CDH2,CDH5,CDKL5,CFL2,CHL1,CHRD,CLEC14A,COL18A1,COL1A1,COL3A1,COL5A1,CPEB1,CSPG4,CTGF,CTNNA2,CX3CR1,CXCL12,CXCL14,CYGB,CYP1B1,CYP7B1,DAB2,DBH,DCHS1,DC…
GO:BP	cell motility	GO:0048870	1.61206e-30	29.7926	1655	1294	229	21354	ACKR3,ACKR4,ACTA2,ACVRL1,ADAMTS1,ADARB1,ADGRA2,ADGRG3,ADGRL3,AGTR1A,AKAP12,AMOTL1,ANGPT1,ANXA1,AOC3,APBB1,APOD,ARTN,ASTN1,ASTN2,ATOH8,ATP1B2,ATP2B4,AXL,BBS1,BMP4,BMPER,BVES,C3AR1,C5AR1,CACNA1H,CADM1,CADM4,CAV1,CCBE1,CCDC141,CCDC65,CD248,CD99L2,CDH13,CDH2,CDH5,CDKL5,CFL2,CHL1,CHRD,CLEC14A,COL18A1,COL1A1,COL3A1,COL5A1,CPEB1,CSPG4,CTGF,CTNNA2,CX3CR1,CXCL12,CXCL14,CYGB,CYP1B1,CYP7B1,DAB2,DBH,DCHS1,DC…
GO:BP	extracellular structure organization	GO:0043062	2.0169e-30	29.6953	291	1294	83	21354	ADAMTS1,ADAMTS18,ADAMTS4,ADAMTS7,ADAMTSL1,ADAMTSL3,ADAMTSL4,AEBP1,ANTXR1,APBB1,CAV1,CAV2,CHADL,COL14A1,COL16A1,COL18A1,COL1A1,COL1A2,COL23A1,COL28A1,COL3A1,COL4A5,COL5A1,COL5A2,COL5A3,COL6A4,COL8A1,COL8A2,CRISPLD2,CRTAP,CTGF,CYP1B1,DDR2,DPT,ECM2,EFEMP2,EGFLAM,EMILIN1,ENG,FBLN2,FBLN5,FKBP10,FLRT2,FN1,FOXF1,FOXF2,GFAP,GREM1,HAS2,HPSE2,ITGA8,ITGB1,KAZALD1,LAMB1,LAMB2,LOXL2,LOXL4,LTBP3,LUM,MFAP4,MMP1…
GO:BP	generation of neurons	GO:0048699	1.55867e-29	28.8072	1635	1294	225	21354	ADAMTS1,ADARB1,ADCY1,ADCYAP1,ADGRL3,ADRA2B,ADRA2C,AMIGO1,APBB1,APOD,ARHGAP44,ARTN,ASTN1,ASTN2,ATL1,ATOH8,ATP1B2,AXL,BBS1,BEND6,BMP4,BMP5,BOC,BRSK1,BRSK2,CAV1,CCDC141,CDH11,CDH2,CDKL5,CFH,CHL1,CHN1,CHODL,CHRDL1,CHRNA3,CNGA3,CNR1,CNTN1,CNTN5,CNTNAP2,COL3A1,CPEB1,CRTAC1,CSPG4,CTNNA2,CX3CR1,CXCL12,DAAM2,DACT1,DLG2,DLG4,DMD,EDNRB,EFEMP1,EFNA5,ELAVL4,EML1,ENAH,EPHA7,EPOR,ETV1,FAIM2,FAM19A1,FAT4,FEZ1,FG…
GO:BP	regulation of ion transmembrane transport	GO:0034765	2.15222e-29	28.6671	589	1294	120	21354	AGTR1A,AKAP6,AMIGO1,ANK2,AOC3,APLNR,ASIC2,ATP1A2,ATP1B2,ATP2B4,BMP4,C1QTNF2,CACNA1B,CACNA1C,CACNA1G,CACNA2D3,CACNB1,CACNB2,CACNG4,CASQ1,CASQ2,CAV1,CAV3,CLIP3,DAPK1,DLG4,DMD,DPP6,DYSF,EDNRA,ESR1,F2R,FGF13,FKBP1B,FLNA,FXYD1,FXYD6,FXYD7,GAL,GALR2,GJA1,GJA5,GJC2,GPC3,GRB10,HECW2,HPCA,HSPA2,HTR3A,HTR3B,IGF1,IRS1,ITGB1,JPH2,JPH3,KCNA2,KCNA5,KCNA6,KCNAB1,KCNB1,KCNC2,KCNC4,KCND2,KCND3,KCNE4,KCNF1,KCNG1,K…
GO:BP	regulation of transmembrane transport	GO:0034762	4.2346e-29	28.3732	593	1294	120	21354	AGTR1A,AKAP6,AMIGO1,ANK2,AOC3,APLNR,ASIC2,ATP1A2,ATP1B2,ATP2B4,BMP4,C1QTNF2,CACNA1B,CACNA1C,CACNA1G,CACNA2D3,CACNB1,CACNB2,CACNG4,CASQ1,CASQ2,CAV1,CAV3,CLIP3,DAPK1,DLG4,DMD,DPP6,DYSF,EDNRA,ESR1,F2R,FGF13,FKBP1B,FLNA,FXYD1,FXYD6,FXYD7,GAL,GALR2,GJA1,GJA5,GJC2,GPC3,GRB10,HECW2,HPCA,HSPA2,HTR3A,HTR3B,IGF1,IRS1,ITGB1,JPH2,JPH3,KCNA2,KCNA5,KCNA6,KCNAB1,KCNB1,KCNC2,KCNC4,KCND2,KCND3,KCNE4,KCNF1,KCNG1,K…
GO:BP	cell junction organization	GO:0034330	8.7605e-29	28.0575	740	1294	136	21354	ACVRL1,ADGRB2,ADGRL1,ADGRL3,AMIGO1,ANK2,APBB1,APOD,ARHGAP44,ARHGAP6,ARHGEF15,ARHGEF9,ASIC2,C5AR1,CACNB1,CACNB2,CADM1,CAV1,CBLN2,CDH11,CDH19,CDH2,CDH5,CDH6,CDKL5,CLSTN2,CLSTN3,CNKSR2,CNTN5,COL16A1,COL4A5,CTNNA2,CX3CR1,DACT1,DCHS1,DGKB,DLC1,DLG2,DLG4,DMPK,DMTN,DRP2,EFNA5,EPHA7,F2R,FAM107A,FERMT2,FGF13,FLNA,FLRT2,FN1,FZD1,GABRB3,GAP43,GDNF,GJA1,GJA5,GJC1,GJD3,GLRB,GPBAR1,GPC6,GREM1,INA,ITGB1,JAM3,KD…
GO:BP	regulation of developmental process	GO:0050793	1.3615e-28	27.866	2602	1294	305	21354	9330182L06RIK,ACVRL1,ADAMTS1,ADAMTS7,ADCYAP1,ADGRA2,ADGRB2,ADGRL1,ADGRL3,ADRA2B,ADRA2C,AGTR1A,AKAP6,AMIGO1,ANXA1,APBB1,APLNR,APOLD1,ARHGAP44,ARHGEF15,ASIC2,ASPN,ATOH8,ATP2B4,AXL,BCL6B,BEND6,BMP4,BMP5,BMPER,BOC,BRSK1,BRSK2,BVES,C3AR1,C5AR1,C6,CACNA1C,CAV1,CAV3,CBLN2,CCBE1,CCDC3,CD109,CDC42EP3,CDH2,CDH3,CDH5,CDKL5,CELF4,CHADL,CHN1,CHODL,CHRD,CHRNA3,CLSTN2,CLSTN3,CMTM5,COL14A1,COL1A1,COL5A1,COL5A2,C…
GO:BP	signaling	GO:0023052	2.85534e-28	27.5443	7187	1294	633	21354	9330182L06RIK,ABCC9,ACKR1,ACKR3,ACKR4,ACTA2,ACVRL1,ADAM22,ADARB1,ADCY1,ADCY5,ADCYAP1,ADCYAP1R1,ADGRA2,ADGRB2,ADGRE1,ADGRF5,ADGRG3,ADGRG6,ADGRL1,ADGRL3,ADGRL4,ADRA2B,ADRA2C,AFAP1L2,AGTR1A,AKAP12,AKAP6,ALDH1A3,AMOTL1,ANGPT1,ANGPTL1,ANK1,ANK2,ANXA1,APBA1,APC2,APH1C,APLN,APLNR,APOD,ARHGAP20,ARHGAP23,ARHGAP44,ARHGAP6,ARHGEF25,ARHGEF9,ARTN,ASIC2,ASPN,ATOH8,ATP2B4,AXL,BACE1,BBS7,BDKRB2,BEND6,BEX2,BMP4,B…
GO:BP	angiogenesis	GO:0001525	3.7748e-28	27.4231	546	1294	113	21354	ACKR3,ACVRL1,ADAMTS1,ADGRA2,ADGRB2,AGTR1A,AMOTL1,ANGPT1,ANGPTL1,ANGPTL2,ANXA1,APLN,APLNR,APOLD1,ATP2B4,BMP4,BMPER,C3AR1,C5AR1,C6,CALCRL,CAV1,CCBE1,CDH13,CDH5,CFH,CLEC14A,COL18A1,COL8A1,COL8A2,CSPG4,CTGF,CX3CR1,CXCL12,CYP1B1,DCN,DYSF,ECM1,EDNRA,EMILIN1,ENG,EPN2,F3,FBLN5,FGF1,FGF18,FGF2,FGFR1,FLNA,FLT1,FLT4,FN1,GATA2,GJA5,GPR4,GREM1,HAND1,HAND2,HGF,HHIP,HOXA5,HOXA7,HSPB1,HSPB6,ITGB1,JAM3,KDR,LEPR,L…
GO:BP	heart development	GO:0007507	3.79902e-28	27.4203	615	1294	121	21354	ACVRL1,ADAMTS1,ADGRG6,AGTR1A,AKAP6,ANGPT1,APLN,APLNR,AW551984,BBS7,BMP4,BMP5,BVES,CACNA1C,CALCRL,CAV3,CC2D2A,CCM2L,COL14A1,COL3A1,COL5A1,DCHS1,EDNRA,EMILIN1,ENG,EPOR,FAT4,FBN1,FGF1,FGF2,FGFR1,FHOD3,FLNA,FLRT2,FN1,FOXF1,FOXL1,FREM2,FZD1,FZD2,GJA1,GJA5,GJC1,GLI2,GLI3,GPC3,GREM1,HAND1,HAND2,HAS2,HEY2,HSPB7,IFITM2,IGF1,ITGB1,JPH2,KCNAB1,KCNJ8,KCNK2,LTBP1,MEIS1,MMP2,MYH10,MYH11,MYOCD,NDRG4,NFATC4,NOG,…
GO:BP	positive regulation of biological process	GO:0048518	3.9242e-28	27.4062	6334	1294	576	21354	9330182L06RIK,ABLIM2,ABLIM3,ACKR3,ACTA2,ACTG2,ACVRL1,ADAMTS1,ADAMTSL4,ADARB1,ADCY1,ADCYAP1,ADCYAP1R1,ADGRA2,ADGRB2,ADGRF5,ADGRL1,ADGRL3,ADRA2B,ADRA2C,AFAP1L2,AGTR1A,AKAP12,AKAP6,ALDH1A3,AMIGO1,AMOTL1,ANGPT1,ANK1,ANK2,ANTXR1,ANXA1,AOC3,APBB1,APLN,APLNR,ARHGEF15,ARMCX3,ARTN,ASIC2,ATOH8,ATP1B2,ATP2B4,AXL,BACE1,BAG2,BBS7,BEND6,BEX2,BMP4,BMP5,BMPER,BOC,BVES,C1QTNF2,C1QTNF3,C1QTNF9,C1RA,C1RL,C1S1,C3AR1…
GO:BP	regulation of locomotion	GO:0040012	8.47695e-28	27.0718	1037	1294	165	21354	ACKR3,ACTA2,ACVRL1,ADAMTS1,ADARB1,ADGRA2,ADGRG3,AKAP12,AMOTL1,ANGPT1,ANXA1,AOC3,APOD,ARTN,ATOH8,ATP1B2,ATP2B4,BBS1,BMP4,BMPER,BVES,C3AR1,C5AR1,CADM4,CAV1,CCBE1,CD99L2,CDH13,CDH5,CHRD,COL18A1,COL1A1,COL3A1,CPEB1,CTNNA2,CX3CR1,CXCL12,CXCL14,CYGB,CYP1B1,DAB2,DCN,DDR2,DLC1,DMTN,DOCK4,DYSF,ECM1,EDNRA,EFEMP1,EMILIN1,ENG,F2R,FAM107A,FERMT2,FGF1,FGF18,FGF2,FGF7,FGFR1,FLNA,FLRT2,FLT1,FLT4,FN1,FOXF1,GAS2L2…
GO:BP	neuron development	GO:0048666	8.93541e-28	27.0489	1212	1294	182	21354	ADAMTS1,ADARB1,ADCY1,ADCYAP1,AMIGO1,APBB1,APOD,ARHGAP44,ARTN,ATL1,ATP1B2,BBS1,BMP4,BMP5,BOC,BRSK1,BRSK2,CCDC141,CDH11,CDH2,CDKL5,CFH,CHL1,CHN1,CHODL,CHRNA3,CNGA3,CNR1,CNTN1,CNTN5,CNTNAP2,CPEB1,CRTAC1,CSPG4,CTNNA2,CXCL12,DACT1,DLG2,DLG4,DMD,EDNRB,EFEMP1,EFNA5,ELAVL4,ENAH,EPHA7,EPOR,ETV1,FAT4,FEZ1,FGFR1,FKBP1B,FLNA,FLRT2,FN1,FZD1,FZD2,GABRB3,GALR2,GAP43,GAS1,GATA2,GDNF,GFAP,GFRA1,GJA1,GLI2,GLI3,GNA…
GO:BP	regulation of cell motility	GO:2000145	1.37499e-27	26.8617	991	1294	160	21354	ACKR3,ACTA2,ACVRL1,ADAMTS1,ADARB1,ADGRA2,ADGRG3,AKAP12,AMOTL1,ANGPT1,ANXA1,AOC3,APOD,ATOH8,ATP1B2,ATP2B4,BBS1,BMP4,BMPER,C3AR1,C5AR1,CADM4,CAV1,CCBE1,CD99L2,CDH13,CDH5,CHRD,COL18A1,COL1A1,COL3A1,CPEB1,CTNNA2,CX3CR1,CXCL12,CXCL14,CYGB,CYP1B1,DAB2,DCN,DDR2,DLC1,DMTN,DOCK4,DYSF,ECM1,EDNRA,EFEMP1,EMILIN1,ENG,F2R,FAM107A,FERMT2,FGF1,FGF18,FGF2,FGF7,FGFR1,FLNA,FLRT2,FLT1,FLT4,FN1,FOXF1,GAS2L2,GATA2,GJA…
GO:BP	neuron differentiation	GO:0030182	1.46452e-27	26.8343	1474	1294	206	21354	ADAMTS1,ADARB1,ADCY1,ADCYAP1,ADRA2B,ADRA2C,AMIGO1,APBB1,APOD,ARHGAP44,ARTN,ATL1,ATOH8,ATP1B2,BBS1,BEND6,BMP4,BMP5,BOC,BRSK1,BRSK2,CAV1,CCDC141,CDH11,CDH2,CDKL5,CFH,CHL1,CHN1,CHODL,CHRDL1,CHRNA3,CNGA3,CNR1,CNTN1,CNTN5,CNTNAP2,CPEB1,CRTAC1,CSPG4,CTNNA2,CXCL12,DACT1,DLG2,DLG4,DMD,EDNRB,EFEMP1,EFNA5,ELAVL4,ENAH,EPHA7,EPOR,ETV1,FAIM2,FAT4,FEZ1,FGFR1,FKBP1B,FLNA,FLRT2,FN1,FZD1,FZD2,GABRB3,GALR2,GAP43,G…
GO:BP	positive regulation of cellular process	GO:0048522	1.59808e-27	26.7964	5833	1294	540	21354	9330182L06RIK,ABLIM2,ABLIM3,ACKR3,ACTA2,ACVRL1,ADAMTS1,ADAMTSL4,ADARB1,ADCY1,ADCYAP1,ADCYAP1R1,ADGRA2,ADGRB2,ADGRF5,ADGRL1,ADGRL3,ADRA2B,ADRA2C,AFAP1L2,AGTR1A,AKAP12,AKAP6,ALDH1A3,AMIGO1,AMOTL1,ANGPT1,ANK1,ANK2,ANTXR1,ANXA1,AOC3,APBB1,APLN,APLNR,ARHGEF15,ARMCX3,ASIC2,ATOH8,ATP1B2,ATP2B4,AXL,BACE1,BAG2,BBS7,BEND6,BEX2,BMP4,BMP5,BMPER,BOC,BVES,C1QTNF2,C1QTNF3,C1QTNF9,C3AR1,C5AR1,C6,CACNA1B,CACNA1C,…
GO:BP	neuron projection development	GO:0031175	1.62168e-27	26.79	1073	1294	168	21354	ADAMTS1,ADARB1,ADCY1,ADCYAP1,AMIGO1,APBB1,APOD,ARHGAP44,ARTN,ATL1,ATP1B2,BBS1,BMP4,BMP5,BOC,BRSK1,BRSK2,CCDC141,CDH11,CDH2,CDKL5,CHL1,CHN1,CHODL,CHRNA3,CNR1,CNTN1,CNTN5,CNTNAP2,CPEB1,CRTAC1,CSPG4,CTNNA2,CXCL12,DACT1,DLG4,DMD,EFEMP1,EFNA5,ELAVL4,ENAH,EPHA7,EPOR,ETV1,FAT4,FEZ1,FGFR1,FKBP1B,FLNA,FLRT2,FN1,FZD1,GALR2,GAP43,GAS1,GDNF,GFAP,GFRA1,GJA1,GLI2,GLI3,GNAO1,GPRC5B,HECW2,HGF,HSPB1,ITGB1,JAM3,KA…
GO:BP	regulation of cell migration	GO:0030334	3.84623e-27	26.415	940	1294	154	21354	ACKR3,ACTA2,ACVRL1,ADAMTS1,ADARB1,ADGRA2,ADGRG3,AKAP12,AMOTL1,ANGPT1,ANXA1,AOC3,APOD,ATOH8,ATP1B2,ATP2B4,BMP4,BMPER,C3AR1,C5AR1,CAV1,CCBE1,CD99L2,CDH13,CDH5,CHRD,COL18A1,COL1A1,COL3A1,CPEB1,CTNNA2,CX3CR1,CXCL12,CXCL14,CYGB,CYP1B1,DAB2,DCN,DDR2,DLC1,DMTN,DOCK4,DYSF,ECM1,EDNRA,EFEMP1,EMILIN1,ENG,F2R,FAM107A,FERMT2,FGF1,FGF18,FGF2,FGF7,FGFR1,FLNA,FLRT2,FLT1,FLT4,FN1,FOXF1,GATA2,GJA1,GPR173,GREM1,HAS…
GO:BP	response to growth factor	GO:0070848	8.35487e-27	26.0781	698	1294	128	21354	9330182L06RIK,ACVRL1,ADAMTS7,ADGRA2,ANGPT1,ANXA1,APLN,ASPN,ATP2B4,BMP4,BMP5,BMPER,CADM4,CAV1,CAV2,CAV3,CCBE1,CD109,CDH5,CERS1,CHRD,CHRDL1,CIDEA,CLEC3B,COL1A1,COL1A2,COL3A1,CTGF,CX3CR1,DAB2,DCN,DMD,ELAVL4,EMILIN1,ENG,EPN2,FAT4,FBN1,FERMT2,FEZ1,FGF1,FGF18,FGF2,FGF7,FGFR1,FGFR2,FLRT2,FLT1,FLT4,FSTL1,FSTL3,FZD1,GAS1,GDNF,GFRA1,GPC3,GRB10,GREM1,GREM2,HAS2,HGF,HHIP,HSPB1,HTR3A,HTRA3,ITGA8,KCNC2,KCND3,K…
GO:BP	cellular response to growth factor stimulus	GO:0071363	8.81264e-27	26.0549	671	1294	125	21354	9330182L06RIK,ACVRL1,ADAMTS7,ADGRA2,ANGPT1,ANXA1,APLN,ASPN,ATP2B4,BMP4,BMP5,BMPER,CADM4,CAV1,CAV2,CAV3,CCBE1,CD109,CDH5,CERS1,CHRD,CHRDL1,CIDEA,CLEC3B,COL1A1,COL1A2,COL3A1,CTGF,CX3CR1,DAB2,DCN,DMD,ELAVL4,EMILIN1,ENG,EPN2,FAT4,FBN1,FERMT2,FEZ1,FGF1,FGF18,FGF2,FGF7,FGFR1,FGFR2,FLRT2,FLT1,FLT4,FSTL1,FSTL3,FZD1,GAS1,GDNF,GFRA1,GPC3,GRB10,GREM1,GREM2,HAS2,HGF,HHIP,HSPB1,HTR3A,HTRA3,ITGA8,KCND3,KDR,LGM…
GO:BP	enzyme linked receptor protein signaling pathway	GO:0007167	9.70648e-27	26.0129	918	1294	151	21354	9330182L06RIK,ACVRL1,ADGRA2,AFAP1L2,ANGPT1,ANGPTL1,APLN,APOD,ASPN,ATOH8,AXL,BMP4,BMP5,BMPER,CADM4,CAV1,CAV2,CAV3,CCBE1,CD109,CDH13,CDH3,CDH5,CERS1,CHN1,CHRD,CHRDL1,CHRNA3,CIDEA,CLEC14A,COL1A1,COL1A2,COL3A1,COL4A5,CSPG4,CTGF,DAB2,DCN,DDR2,EFEMP1,EFNA5,EFS,EIF4EBP1,EMILIN1,ENG,ENHO,EPHA7,EPN2,ESR1,F3,FAT4,FBN1,FERMT2,FGF1,FGF18,FGF2,FGF7,FGFR1,FGFR2,FLRT2,FLT1,FLT4,FSTL1,FSTL3,FZD1,GDF10,GDNF,GFRA1…
GO:BP	cell communication	GO:0007154	6.23419e-26	25.2052	7249	1294	629	21354	9330182L06RIK,ACKR1,ACKR3,ACKR4,ACTA2,ACVRL1,ADAM22,ADARB1,ADCY1,ADCY5,ADCYAP1,ADCYAP1R1,ADGRA2,ADGRB2,ADGRE1,ADGRF5,ADGRG3,ADGRG6,ADGRL1,ADGRL3,ADGRL4,ADRA2B,ADRA2C,AFAP1L2,AGTR1A,AKAP12,AKAP6,ALDH1A3,AMOTL1,ANGPT1,ANGPTL1,ANK1,ANK2,ANXA1,APBA1,APC2,APH1C,APLN,APLNR,APOD,ARHGAP20,ARHGAP23,ARHGAP44,ARHGAP6,ARHGEF25,ARHGEF9,ARTN,ASIC2,ASPN,ATOH8,ATP2B4,AXL,BACE1,BBS7,BDKRB2,BEND6,BEX2,BMP4,BMP5,BM…
GO:BP	synaptic signaling	GO:0099536	1.29079e-25	24.8891	736	1294	130	21354	ADARB1,ADCY1,ADCYAP1,AKAP12,APBA1,BACE1,BRSK1,CACNA1B,CACNA1C,CACNA1G,CACNB1,CACNB2,CACNG4,CADM1,CADPS,CALB2,CAV2,CBLN2,CDH11,CDH2,CELF4,CELF6,CHRM2,CHRNA3,CHRNA5,CLSTN2,CLSTN3,CNR1,CPEB1,CPLX1,CX3CR1,DGKB,DLG2,DLG4,DMPK,DOC2B,DRP2,DTNA,ELAVL4,F2R,FAM107A,GABBR1,GABRB3,GDNF,GFAP,GJC1,GLRB,GNAI1,GRIA1,GRIA4,GRIK3,HTR3B,ITGB1,JPH3,JPH4,KCNB1,KCNC4,KCNJ10,KCNQ4,LAMA2,LGMN,LIN7B,LRRC4C,LRRTM1,LY6C1,M…
GO:BP	tissue morphogenesis	GO:0048729	1.80207e-25	24.7442	646	1294	120	21354	ACTA2,ACTG2,ACVRL1,ADARB1,AGTR1A,ALDH1A3,ANGPT1,ARTN,ASTN2,BMP4,BMP5,BRSK1,BRSK2,CAV3,CC2D2A,CCM2L,CHRD,COL3A1,COL5A1,CXCL12,CYP7B1,DAB2,DACT1,DCHS1,EDNRA,ENAH,ENG,EPHA7,EPOR,ESR1,FAT4,FERMT2,FGF1,FGF2,FGF7,FGFR1,FGFR2,FLNA,FOXF1,FOXF2,FOXL1,FREM2,FRZB,FZD1,FZD2,GDNF,GJA1,GLI2,GLI3,GPC3,GREM1,HAND1,HAND2,HEY2,HGF,HHIP,HOXA5,HOXB2,ID4,IGF1,IGFBP5,ITGA8,KDR,KIF26B,KRT17,LAMA1,MAGED1,MMP2,MYLK,MYO9A…
GO:BP	cation transport	GO:0006812	4.13125e-25	24.3839	1208	1294	176	21354	ABCC9,ADCYAP1,ADCYAP1R1,AGTR1A,AKAP6,AMIGO1,ANK1,ANK2,APLNR,ASIC2,ASIC4,ATP1A2,ATP1B2,ATP2B3,ATP2B4,BMP4,CACNA1B,CACNA1C,CACNA1G,CACNA1H,CACNA2D3,CACNB1,CACNB2,CACNG4,CALCRL,CASQ1,CASQ2,CAV1,CAV3,CHRNA3,CNGA3,CNR1,CNTN1,CTGF,CXCL12,DAPK1,DLG4,DMD,DMPK,DPP6,DYSF,EDNRA,F2R,FAM155A,FAM26E,FGF13,FGF2,FKBP1B,FLNA,FXYD1,FXYD6,FXYD7,GABBR1,GAL,GALR2,GDNF,GJA1,GJA5,GJC2,GNAO1,HECW2,HPCA,HSPA2,IGF1,ITGB1,…
GO:BP	regulation of ion transport	GO:0043269	4.68149e-25	24.3296	1382	1294	192	21354	ADCY5,ADCYAP1,ADCYAP1R1,AGTR1A,AKAP6,AMIGO1,ANGPT1,ANK2,ANXA1,AOC3,APBB1,APLN,APLNR,APOD,ARHGAP44,ASIC2,ATP1A2,ATP1B2,ATP2B4,BMP4,BRSK2,C1QTNF2,C1QTNF3,CACNA1B,CACNA1C,CACNA1G,CACNA2D3,CACNB1,CACNB2,CACNG4,CASQ1,CASQ2,CAV1,CAV3,CD200,CHRNA3,CLIP3,CNR1,CNTN1,CXCL12,DAPK1,DLG4,DMD,DMPK,DMTN,DOC2B,DPP6,DYSF,EDNRA,EFNA5,ENHO,ESR1,F2R,FABP3,FGF13,FGFR1,FKBP1B,FLNA,FNDC1,FRMD4A,FXYD1,FXYD6,FXYD7,GABBR1…
GO:BP	trans-synaptic signaling	GO:0099537	5.4253e-25	24.2656	709	1294	126	21354	ADARB1,ADCY1,ADCYAP1,AKAP12,APBA1,BACE1,BRSK1,CACNA1B,CACNA1C,CACNA1G,CACNB1,CACNB2,CACNG4,CADM1,CADPS,CALB2,CAV2,CBLN2,CDH11,CDH2,CELF4,CELF6,CHRM2,CHRNA3,CHRNA5,CLSTN2,CLSTN3,CNR1,CPEB1,CPLX1,CX3CR1,DGKB,DLG2,DLG4,DMPK,DOC2B,ELAVL4,F2R,FAM107A,GABBR1,GABRB3,GDNF,GFAP,GJC1,GLRB,GNAI1,GRIA1,GRIA4,GRIK3,HTR3B,ITGB1,JPH3,JPH4,KCNB1,KCNC4,KCNJ10,KCNQ4,LAMA2,LGMN,LIN7B,LRRC4C,LRRTM1,MAP1B,MAPK8IP2,MA…
GO:BP	chemical synaptic transmission	GO:0007268	6.52219e-25	24.1856	701	1294	125	21354	ADARB1,ADCY1,ADCYAP1,AKAP12,APBA1,BACE1,BRSK1,CACNA1B,CACNA1C,CACNA1G,CACNB1,CACNB2,CACNG4,CADPS,CALB2,CAV2,CBLN2,CDH11,CDH2,CELF4,CELF6,CHRM2,CHRNA3,CHRNA5,CLSTN2,CLSTN3,CNR1,CPEB1,CPLX1,CX3CR1,DGKB,DLG2,DLG4,DMPK,DOC2B,ELAVL4,F2R,FAM107A,GABBR1,GABRB3,GDNF,GFAP,GJC1,GLRB,GNAI1,GRIA1,GRIA4,GRIK3,HTR3B,ITGB1,JPH3,JPH4,KCNB1,KCNC4,KCNJ10,KCNQ4,LAMA2,LGMN,LIN7B,LRRC4C,LRRTM1,MAP1B,MAPK8IP2,MAPT,MGL…
GO:BP	anterograde trans-synaptic signaling	GO:0098916	6.52219e-25	24.1856	701	1294	125	21354	ADARB1,ADCY1,ADCYAP1,AKAP12,APBA1,BACE1,BRSK1,CACNA1B,CACNA1C,CACNA1G,CACNB1,CACNB2,CACNG4,CADPS,CALB2,CAV2,CBLN2,CDH11,CDH2,CELF4,CELF6,CHRM2,CHRNA3,CHRNA5,CLSTN2,CLSTN3,CNR1,CPEB1,CPLX1,CX3CR1,DGKB,DLG2,DLG4,DMPK,DOC2B,ELAVL4,F2R,FAM107A,GABBR1,GABRB3,GDNF,GFAP,GJC1,GLRB,GNAI1,GRIA1,GRIA4,GRIK3,HTR3B,ITGB1,JPH3,JPH4,KCNB1,KCNC4,KCNJ10,KCNQ4,LAMA2,LGMN,LIN7B,LRRC4C,LRRTM1,MAP1B,MAPK8IP2,MAPT,MGL…
GO:BP	regulation of metal ion transport	GO:0010959	3.42444e-24	23.4654	430	1294	93	21354	ADCYAP1,ADCYAP1R1,AGTR1A,AKAP6,AMIGO1,ANK2,APLNR,ATP1A2,ATP1B2,ATP2B4,BMP4,CACNA1B,CACNA1C,CACNA1G,CACNB1,CACNB2,CASQ1,CASQ2,CAV1,CAV3,CNTN1,CXCL12,DMD,DMPK,DPP6,DYSF,EDNRA,F2R,FGF13,FKBP1B,FLNA,FXYD1,FXYD6,FXYD7,GAL,GALR2,GJA1,GJC2,GNAO1,HECW2,HPCA,HSPA2,IGF1,ITGB1,JPH2,JPH3,JPH4,KCNA5,KCNAB1,KCNC2,KCNE4,KCNG1,KCNH2,KCNIP2,KCNIP4,KCNMB1,LRRC55,MYLK,NGF,NOL3,NOS1,NOS3,NTSR1,OPRK1,OPRL1,OSR1,P2RY6…
GO:BP	cell projection organization	GO:0030030	4.46917e-24	23.3498	1586	1294	208	21354	ABLIM2,ABLIM3,ADAMTS1,ADARB1,ADCY1,ADCYAP1,AMIGO1,APBB1,APOD,ARHGAP44,ARTN,ATL1,ATP1B2,BBS1,BBS7,BMP4,BMP5,BOC,BRSK1,BRSK2,CAV1,CC2D2A,CCDC141,CCDC65,CDC42EP3,CDH11,CDH13,CDH2,CDKL5,CHL1,CHN1,CHODL,CHRNA3,CNR1,CNTN1,CNTN5,CNTNAP2,CPEB1,CRTAC1,CSPG4,CTNNA2,CXCL12,DACT1,DLG4,DMD,DMTN,DNAL1,DZIP1,DZIP1L,EFEMP1,EFNA5,EHD2,ELAVL4,ENAH,EPHA7,EPOR,ETV1,FAT4,FEZ1,FGD1,FGFR1,FKBP1B,FLNA,FLRT2,FN1,FZD1,GAL…
GO:BP	metal ion transport	GO:0030001	5.79834e-24	23.2367	902	1294	144	21354	ABCC9,ADCYAP1,ADCYAP1R1,AGTR1A,AKAP6,AMIGO1,ANK2,APLNR,ASIC2,ASIC4,ATP1A2,ATP1B2,ATP2B3,ATP2B4,BMP4,CACNA1B,CACNA1C,CACNA1G,CACNA1H,CACNA2D3,CACNB1,CACNB2,CACNG4,CALCRL,CASQ1,CASQ2,CAV1,CAV3,CNTN1,CTGF,CXCL12,DMD,DMPK,DPP6,DYSF,EDNRA,F2R,FAM155A,FGF13,FGF2,FKBP1B,FLNA,FXYD1,FXYD6,FXYD7,GAL,GALR2,GJA1,GJA5,GJC2,GNAO1,HECW2,HPCA,HSPA2,IGF1,ITGB1,JPH2,JPH3,JPH4,KCNA2,KCNA5,KCNA6,KCNAB1,KCNB1,KCNC2,K…
GO:BP	regulation of signal transduction	GO:0009966	9.75856e-24	23.0106	2834	1294	310	21354	9330182L06RIK,ACKR3,ACTA2,ACVRL1,ADCYAP1,ADCYAP1R1,ADGRA2,ADGRG3,ADRA2B,ADRA2C,AFAP1L2,AGTR1A,AKAP12,AKAP6,ALDH1A3,ANGPT1,APC2,APLN,APLNR,APOD,ARHGAP44,ARHGEF25,ASPN,ATP2B4,AXL,BDKRB2,BEND6,BMP4,BMP5,BMPER,C1QTNF2,C1QTNF3,C5AR1,CACNG4,CADM4,CAV1,CAV2,CAV3,CCBE1,CCDC3,CD109,CDH13,CDH2,CDH3,CDH5,CELF4,CERS1,CHN1,CHRD,CHRDL1,CIDEA,CNKSR2,CNRIP1,COL1A1,COL3A1,CSPG4,CTGF,CX3CR1,CXCL12,CYP1B1,CYP7B1,DA…
GO:BP	regulation of system process	GO:0044057	1.18884e-23	22.9249	620	1294	114	21354	ABCC9,ADRA2B,ADRA2C,AGTR1A,AKAP6,ANK2,APLN,ASIC2,ATP1A2,ATP2B4,BVES,CACNA1B,CACNA1C,CACNA1G,CACNB2,CACNG4,CALCRL,CALD1,CASQ1,CASQ2,CAV1,CAV3,CELF4,CHRM2,CHRNA3,CTGF,CTNNA3,DBH,DLG4,DMD,DMPK,DOCK4,EDNRB,F2R,FGF13,FGFR1,FKBP1B,FLNA,FXYD1,GAL,GJA1,GJA5,GJC1,GJD3,GNAO1,HAND2,HEY2,HGF,HSPB6,IGF1,IGFBP5,JAM2,KCNA5,KCNC4,KCND3,KCNE4,KCNH2,KCNJ10,KCNJ5,MGLL,MMP2,MRVI1,MYOCD,NLGN2,NOL3,NOS1,NOS3,NPNT,NPTX…
GO:BP	plasma membrane bounded cell projection organization	GO:0120036	1.8391e-23	22.7354	1546	1294	203	21354	ABLIM2,ABLIM3,ADAMTS1,ADARB1,ADCY1,ADCYAP1,AMIGO1,APBB1,APOD,ARHGAP44,ARTN,ATL1,ATP1B2,BBS1,BBS7,BMP4,BMP5,BOC,BRSK1,BRSK2,CAV1,CC2D2A,CCDC141,CCDC65,CDC42EP3,CDH11,CDH13,CDH2,CDKL5,CHL1,CHN1,CHODL,CHRNA3,CNR1,CNTN1,CNTN5,CNTNAP2,CPEB1,CRTAC1,CSPG4,CTNNA2,CXCL12,DACT1,DLG4,DMD,DMTN,DNAL1,DZIP1,DZIP1L,EFEMP1,EFNA5,EHD2,ELAVL4,ENAH,EPHA7,EPOR,ETV1,FAT4,FEZ1,FGD1,FGFR1,FKBP1B,FLNA,FLRT2,FN1,FZD1,GAL…
GO:BP	synapse organization	GO:0050808	5.71746e-23	22.2428	471	1294	96	21354	ADGRB2,ADGRL1,ADGRL3,AMIGO1,APBB1,ARHGAP44,ARHGEF15,ARHGEF9,ASIC2,C5AR1,CACNB1,CACNB2,CADM1,CBLN2,CDH2,CDKL5,CLSTN2,CLSTN3,CNKSR2,CNTN5,COL4A5,CTNNA2,CX3CR1,DACT1,DGKB,DLG2,DLG4,DMPK,DRP2,EFNA5,EPHA7,F2R,FGF13,FLNA,FLRT2,FZD1,GABRB3,GAP43,GDNF,GLRB,GPC6,INA,KIF1A,LAMB2,LGI2,LGMN,LRFN1,LRRC4B,LRRC4C,LRRN3,LRRTM1,MAP1B,MAPT,MPP2,MUSK,MYH10,NEFL,NFATC4,NLGN2,NRP1,NRP2,NTN1,OBSL1,PCDH17,PCDHGC3,PDZRN…
GO:BP	cellular component organization	GO:0016043	7.25993e-23	22.1391	6100	1294	542	21354	A4GALT,ABLIM2,ABLIM3,ACVRL1,ADAMTS1,ADAMTS18,ADAMTS4,ADAMTS7,ADAMTSL1,ADAMTSL3,ADAMTSL4,ADARB1,ADCY1,ADCYAP1,ADGRB2,ADGRG6,ADGRL1,ADGRL3,ADGRL4,AEBP1,AKAP6,ALDH1A3,AMIGO1,AMOTL1,ANGPT1,ANK1,ANK2,ANTXR1,ANXA1,APBA1,APBB1,APC2,APLN,APOD,ARHGAP44,ARHGAP6,ARHGEF15,ARHGEF17,ARHGEF9,ARMCX3,ARTN,ASIC2,ATL1,ATP10A,ATP1B2,AXL,BBS1,BBS7,BC034090,BMP4,BMP5,BOC,BRSK1,BRSK2,C1QTNF9,C5AR1,CACNB1,CACNB2,CADM1,C…
GO:BP	regulation of biological process	GO:0050789	9.51894e-23	22.0214	12791	1294	951	21354	9330182L06RIK,ABCC9,ABLIM2,ABLIM3,ACKR1,ACKR3,ACKR4,ACTA2,ACTG2,ACVRL1,ADAM22,ADAMTS1,ADAMTS18,ADAMTS7,ADAMTSL4,ADARB1,ADCY1,ADCY5,ADCYAP1,ADCYAP1R1,ADGRA2,ADGRB2,ADGRE1,ADGRF5,ADGRG3,ADGRG6,ADGRL1,ADGRL3,ADGRL4,ADRA2B,ADRA2C,AEBP1,AFAP1L2,AGTR1A,AHRR,AK4,AKAP12,AKAP6,ALDH1A3,AMIGO1,AMOTL1,ANGPT1,ANGPTL1,ANK1,ANK2,ANTXR1,ANXA1,AOAH,AOC3,APBA1,APBB1,APC2,APH1C,APLN,APLNR,APOD,APOLD1,ARHGAP20,ARHGA…
GO:BP	regulation of cellular process	GO:0050794	1.88052e-22	21.7257	12239	1294	919	21354	9330182L06RIK,ABLIM2,ABLIM3,ACKR1,ACKR3,ACKR4,ACTA2,ACVRL1,ADAM22,ADAMTS1,ADAMTS18,ADAMTS7,ADAMTSL4,ADARB1,ADCY1,ADCY5,ADCYAP1,ADCYAP1R1,ADGRA2,ADGRB2,ADGRE1,ADGRF5,ADGRG3,ADGRG6,ADGRL1,ADGRL3,ADGRL4,ADRA2B,ADRA2C,AEBP1,AFAP1L2,AGTR1A,AHRR,AK4,AKAP12,AKAP6,ALDH1A3,AMIGO1,AMOTL1,ANGPT1,ANGPTL1,ANK1,ANK2,ANTXR1,ANXA1,AOC3,APBA1,APBB1,APC2,APH1C,APLN,APLNR,APOD,APOLD1,ARHGAP20,ARHGAP23,ARHGAP44,ARHG…
GO:BP	cellular response to chemical stimulus	GO:0070887	2.82858e-22	21.5484	3111	1294	327	21354	9330182L06RIK,ABCG4,ACKR1,ACKR3,ACKR4,ACVRL1,ADAMTS7,ADCY1,ADCY5,ADCYAP1,ADGRA2,AGTR1A,AHRR,AK4,AKAP12,AKAP6,AMIGO1,ANGPT1,ANXA1,APLN,ASIC2,ASPN,ATP1A2,ATP2B4,AXL,BACE1,BDKRB2,BMP4,BMP5,BMPER,BRSK2,C1QTNF9,C3AR1,C5AR1,CACNA1H,CACNB1,CADM4,CALCRL,CALY,CASP12,CASQ2,CAV1,CAV2,CAV3,CCBE1,CCDC3,CD109,CDH5,CERS1,CHRD,CHRDL1,CHRM2,CHRNA3,CIDEA,CLEC3B,CNTFR,COL16A1,COL1A1,COL1A2,COL3A1,COL5A2,COL6A1,COLE…
GO:BP	muscle contraction	GO:0006936	3.05623e-22	21.5148	310	1294	75	21354	ACTA2,ADRA2B,ADRA2C,AKAP6,ANK2,ATP1A2,ATP2B4,BDKRB2,CACNA1C,CACNA1G,CACNB2,CALCRL,CALD1,CASQ1,CASQ2,CAV1,CAV3,CHRM2,CHRNA3,CTGF,CTNNA3,DMD,DMPK,DOCK4,EDNRA,EDNRB,F2R,FGF13,FKBP1B,FLNA,FXYD1,GDNF,GJA5,HSPB6,KCNA5,KCND3,KCNE4,KCNH2,KCNJ5,KCNJ8,LMOD1,MRVI1,MYL1,MYLK,MYOCD,MYOM1,NMUR1,NOS1,NPNT,NPY1R,NPY2R,PLN,PRKG1,PTGS2,RNF207,RYR2,SCN1B,SCN5A,SCN7A,SGCD,SLC8A1,SMTN,STAC,STC1,SYNM,TACR1,TACR2,TACR3…
GO:BP	circulatory system process	GO:0003013	3.08018e-22	21.5114	516	1294	100	21354	ABCC9,ACTA2,ACVRL1,ADRA2B,ADRA2C,AGTR1A,AKAP12,AKAP6,ANGPT1,ANK2,AOC3,APLN,ASIC2,ATP1A2,ATP2B4,BDKRB2,BVES,C3AR1,CACNA1B,CACNA1C,CACNA1G,CACNB2,CASQ2,CAV1,CAV3,CDH5,CHRM2,CNR1,COL1A2,CTGF,CTNNA3,DBH,DMD,DMPK,DOCK4,EDNRA,EDNRB,ENG,F2R,FERMT2,FGF13,FKBP1B,FLNA,FXYD1,GJA1,GJA5,GJC1,GJD3,GNAO1,GPR37L1,GPR4,HEY2,KCNA5,KCND3,KCNE4,KCNH2,KCNJ5,KCNJ8,MMP2,MRVI1,MYL1,NOS1,NOS3,NPY1R,NR2F2,NTSR1,OPRL1,PLN,…
GO:BP	blood circulation	GO:0008015	3.20051e-22	21.4948	490	1294	97	21354	ABCC9,ACTA2,ACVRL1,ADRA2B,ADRA2C,AGTR1A,AKAP12,AKAP6,ANGPT1,ANK2,AOC3,APLN,ASIC2,ATP1A2,ATP2B4,BDKRB2,BVES,C3AR1,CACNA1B,CACNA1C,CACNA1G,CACNB2,CASQ2,CAV1,CAV3,CDH5,CHRM2,CNR1,COL1A2,CTGF,CTNNA3,DBH,DMD,DMPK,DOCK4,EDNRA,EDNRB,ENG,F2R,FERMT2,FGF13,FKBP1B,FLNA,FXYD1,GJA1,GJA5,GJC1,GJD3,GNAO1,GPR37L1,GPR4,HEY2,KCNA5,KCND3,KCNE4,KCNH2,KCNJ5,KCNJ8,MMP2,MRVI1,MYL1,NOS1,NOS3,NPY1R,NR2F2,NTSR1,OPRL1,PLN,…
GO:BP	regulation of cation transmembrane transport	GO:1904062	3.32389e-22	21.4784	373	1294	83	21354	AGTR1A,AKAP6,AMIGO1,ANK2,APLNR,ASIC2,ATP1A2,ATP1B2,ATP2B4,BMP4,CACNA1C,CACNB1,CACNB2,CACNG4,CASQ1,CASQ2,CAV1,CAV3,DAPK1,DLG4,DMD,DPP6,DYSF,EDNRA,F2R,FGF13,FKBP1B,FLNA,FXYD1,FXYD6,FXYD7,GAL,GALR2,GJC2,HECW2,HPCA,HSPA2,ITGB1,JPH2,JPH3,KCNAB1,KCNC2,KCNE4,KCNG1,KCNH2,KCNIP2,KCNIP4,KCNMB1,LRRC55,MAPK8IP2,NGF,NLGN2,NOL3,NOS1,NTSR1,OPRK1,OPRL1,OSR1,P2RY6,PIRT,PKD2,PLCB1,PLN,PLP1,PRKD1,PRKG1,REM1,RGS4,RN…
GO:BP	central nervous system development	GO:0007417	5.25653e-22	21.2793	1025	1294	152	21354	ADARB1,ADCY1,ADCYAP1,ADGRA2,ADGRL3,AK4,ALDH1A3,AMIGO1,APOD,ATP1A2,ATP1B2,ATP2B4,AXL,B4GALT2,BBS1,BBS7,BMP4,BMP5,C5AR1,CCDC141,CDH11,CDH2,CERS1,CHRD,CNTN1,CNTNAP2,COL3A1,CRTAC1,CTNNA2,CX3CR1,CXCL12,DAAM2,DMD,DNER,DRP2,EFNA5,ELAVL4,EML1,ENG,EPHA7,EPOR,FAIM2,FAT4,FEZ1,FGF13,FGF2,FGFR1,FLNA,FOXP2,FUT10,GABRB3,GAS1,GATA2,GDNF,GFAP,GJC2,GLI2,GLI3,GNAO1,GPR37L1,H2AFY2,HNMT,HOXB2,HPCA,ID4,IGF1,ITGA8,ITGB…
GO:BP	biological regulation	GO:0065007	2.84826e-21	20.5454	13429	1294	981	21354	9330182L06RIK,ABCC9,ABLIM2,ABLIM3,ACKR1,ACKR3,ACKR4,ACTA2,ACTG2,ACVRL1,ADAM22,ADAMTS1,ADAMTS18,ADAMTS7,ADAMTSL4,ADARB1,ADCY1,ADCY5,ADCYAP1,ADCYAP1R1,ADGRA2,ADGRB2,ADGRE1,ADGRF5,ADGRG3,ADGRG6,ADGRL1,ADGRL3,ADGRL4,ADRA2B,ADRA2C,AEBP1,AFAP1L2,AGTR1A,AHRR,AK4,AKAP12,AKAP6,ALDH1A3,AMIGO1,AMOTL1,ANGPT1,ANGPTL1,ANK1,ANK2,ANTXR1,ANXA1,AOAH,AOC3,APBA1,APBB1,APC2,APH1C,APLN,APLNR,APOD,APOLD1,ARHGAP20,ARHGA…
GO:BP	muscle system process	GO:0003012	3.70377e-21	20.4314	436	1294	89	21354	ACTA2,ADRA2B,ADRA2C,AKAP6,ANK2,ATP1A2,ATP2B4,BDKRB2,CACNA1C,CACNA1G,CACNB2,CALCRL,CALD1,CASQ1,CASQ2,CAV1,CAV3,CHRM2,CHRNA3,COL14A1,CTGF,CTNNA3,DMD,DMPK,DOCK4,EDNRA,EDNRB,F2R,FGF13,FKBP1B,FLNA,FXYD1,GDNF,GJA5,HAND2,HEY2,HSPB6,IGF1,IGFBP5,KCNA5,KCND3,KCNE4,KCNH2,KCNJ5,KCNJ8,LMOD1,MRVI1,MYL1,MYLK,MYOCD,MYOM1,NMUR1,NOL3,NOS1,NOS3,NPNT,NPY1R,NPY2R,PI16,PLN,PRKG1,PTGS2,RGS4,RNF207,RYR2,SCN1B,SCN5A,SCN7…
GO:BP	regulation of anatomical structure morphogenesis	GO:0022603	5.40428e-21	20.2673	964	1294	144	21354	ACVRL1,ADAMTS1,ADGRA2,ADGRB2,AGTR1A,AMIGO1,ANXA1,APLNR,ARHGAP44,ATP2B4,BMP4,BMPER,BRSK1,BRSK2,BVES,C3AR1,C5AR1,C6,CAV3,CCBE1,CDC42EP3,CDH2,CDH5,CDKL5,CHN1,CHODL,CHRNA3,CX3CR1,CXCL12,CYP1B1,DAB2,DACT1,DCN,DLC1,DLG4,DMTN,ECM1,EDNRA,EFNA5,EMILIN1,ENG,EPHA7,EPN2,ESR1,F3,FBLN5,FERMT2,FGD1,FGF1,FGF18,FGF2,FGF7,FGFR1,FLNA,FLT1,FLT4,FN1,FZD1,FZD2,GATA2,GDNF,GJA1,GPC3,GPR4,GREM1,HAS2,HECW2,HGF,HHIP,HOXA5,…
GO:BP	regulation of multicellular organismal development	GO:2000026	7.08658e-21	20.1496	1447	1294	188	21354	9330182L06RIK,ACVRL1,ADAMTS1,ADAMTS7,ADCYAP1,ADGRA2,ADGRB2,ADGRL1,ADGRL3,AKAP6,AMIGO1,ANXA1,APLNR,APOLD1,ASIC2,ASPN,ATOH8,ATP2B4,AXL,BMP4,BMPER,C3AR1,C5AR1,C6,CAV1,CAV3,CBLN2,CCBE1,CD109,CDH2,CDH3,CDH5,CDKL5,CHADL,CHODL,CLSTN2,CLSTN3,COL14A1,CTGF,CX3CR1,CXCL12,CYP1B1,DAAM2,DCN,DDR2,ECM1,EFEMP1,EFNA5,EMILIN1,ENG,EPHA7,EPN2,F3,FAT4,FBLN5,FBN1,FGF1,FGF18,FGF2,FGFR1,FLRT2,FLT1,FN1,FRZB,FSTL3,GAL,GATA…
GO:BP	muscle structure development	GO:0061061	7.9682e-21	20.0986	658	1294	113	21354	ADARB1,AKAP6,ANGPT1,ANK2,AW551984,BMP4,BOC,BVES,CASQ1,CASQ2,CAV1,CAV2,CAV3,CCM2L,CDH2,CFH,CFL2,CMTM5,CNTFR,COL14A1,COL3A1,CRYAB,CSRP1,CXCL12,CXCL14,DCN,DES,DMD,DMPK,DNER,DYSF,EDNRB,EHD2,ENG,EPOR,ETV1,FHOD3,FLNC,FOXF1,FOXP2,FZD1,FZD2,GJA1,GREM1,HAND1,HAND2,HEY2,HLX,IGF1,IGFBP3,IGFBP5,ITGA8,ITGB1,JAM2,JPH2,KCNAB1,MEOX2,MYH10,MYH11,MYLK,MYOCD,MYOF,MYOM1,NFATC4,NOG,NOL3,NPNT,NR2F2,OLFM2,PDGFRA,PDGFRB…
GO:BP	regulation of blood circulation	GO:1903522	1.00389e-20	19.9983	251	1294	65	21354	ABCC9,ADRA2B,ADRA2C,AGTR1A,AKAP6,ANK2,APLN,ASIC2,ATP1A2,ATP2B4,BVES,CACNA1B,CACNA1C,CACNA1G,CACNB2,CASQ2,CAV1,CAV3,CHRM2,CTGF,CTNNA3,DBH,DMD,DMPK,DOCK4,F2R,FGF13,FKBP1B,FLNA,FXYD1,GJA1,GJA5,GJC1,GJD3,GNAO1,HEY2,KCNA5,KCND3,KCNE4,KCNH2,KCNJ5,MMP2,NOS1,NOS3,NPY1R,PLN,POPDC2,PRKG1,PTGS2,RGS4,RYR2,SCN1B,SCN5A,SEMA3A,SLC4A3,SLC8A1,SMTN,STC1,TACR1,TACR3,TBX2,TBXAS1,TGFB2,TNNT2,TPM1
GO:BP	behavior	GO:0007610	1.20035e-20	19.9207	719	1294	119	21354	ADAM22,ADARB1,ADCY1,ADCY5,ADCYAP1,ADGRL3,AGTR1A,ALDH1A3,AOC3,APBA1,APLN,ASIC4,ASTN1,ATP1A2,ATP1B2,B4GALT2,BACE1,BBS1,BRSK1,CACNA1B,CACNA1C,CELF6,CHL1,CHRNA3,CHRNA5,CNR1,CNTFR,CNTNAP2,CX3CR1,CXCL12,CYP7B1,DBH,DLG4,ELAVL4,ETV1,FGF13,FOXP2,GABRB3,GAL,GJA1,GLI3,GLRB,GNAO1,GNG7,GNG8,GPR37,GPRC5B,GRIA1,GRPR,HAND2,IGF1,ITGA8,ITGB1,JPH3,JPH4,KCNA2,KCNAB1,KCND2,KCNJ10,KCNK2,LAMB1,LEPR,LGI4,LGMN,LRRTM1,LSA…
GO:BP	head development	GO:0060322	1.36044e-20	19.8663	809	1294	128	21354	ADCY1,ADCYAP1,ADGRL3,AK4,ALDH1A3,AMIGO1,APOD,ATP1A2,ATP1B2,ATP2B4,AXL,B4GALT2,BBS1,BBS7,BMP4,BMP5,C5AR1,CCDC141,CDH2,CERS1,CHRD,CNTN1,CNTNAP2,COL1A1,COL3A1,CRISPLD1,CRISPLD2,CRTAC1,CTNNA2,CXCL12,DMD,EDNRA,EFNA5,ELAVL4,EML1,EPHA7,EPOR,FAIM2,FAT4,FEZ1,FGF13,FGF2,FGFR1,FLNA,FOXP2,FUT10,GABRB3,GAS1,GATA2,GJC2,GLI2,GLI3,GNAO1,GPR37L1,H2AFY2,HNMT,HOXB2,HPCA,ID4,IGF1,ITGA8,ITGB1,KCNAB1,KCNC2,KCNK3,KIF1A…
GO:BP	positive regulation of locomotion	GO:0040017	3.02324e-20	19.5195	602	1294	106	21354	ACKR3,ACTA2,ADAMTS1,ADGRA2,AKAP12,AMOTL1,ANGPT1,ANXA1,AOC3,ARTN,ATOH8,BMP4,BVES,C3AR1,C5AR1,CAV1,CCBE1,CD99L2,CDH13,CDH5,COL18A1,COL1A1,CPEB1,CX3CR1,CXCL12,CXCL14,CYP1B1,DAB2,DDR2,DMTN,DOCK4,DYSF,EDNRA,F2R,FAM107A,FERMT2,FGF1,FGF18,FGF2,FGF7,FGFR1,FLNA,FLT1,FLT4,FN1,FOXF1,GATA2,HAS2,HGF,HSPB1,IGF1,IGF1R,IGFBP5,IL1R1,ITGB1,JAM2,JAM3,KDR,LAMB1,LGMN,MCAM,MMP2,MYLK,NOS3,NRP1,NTN1,OPRK1,P2RY6,PDGFD,PD…
GO:BP	cellular component organization or biogenesis	GO:0071840	7.32034e-20	19.1355	6283	1294	543	21354	A4GALT,ABLIM2,ABLIM3,ACVRL1,ADAMTS1,ADAMTS18,ADAMTS4,ADAMTS7,ADAMTSL1,ADAMTSL3,ADAMTSL4,ADARB1,ADCY1,ADCYAP1,ADGRB2,ADGRG6,ADGRL1,ADGRL3,ADGRL4,AEBP1,AKAP6,ALDH1A3,AMIGO1,AMOTL1,ANGPT1,ANK1,ANK2,ANTXR1,ANXA1,APBA1,APBB1,APC2,APLN,APOD,ARHGAP44,ARHGAP6,ARHGEF15,ARHGEF17,ARHGEF9,ARMCX3,ARTN,ASIC2,ATL1,ATP10A,ATP1B2,AXL,BBS1,BBS7,BC034090,BMP4,BMP5,BOC,BRSK1,BRSK2,C1QTNF9,C5AR1,CACNB1,CACNB2,CADM1,C…
GO:BP	cation transmembrane transport	GO:0098655	8.82992e-20	19.054	887	1294	134	21354	ABCC9,AGTR1A,AKAP6,AMIGO1,ANK2,APLNR,ASIC2,ASIC4,ATP1A2,ATP1B2,ATP2B3,ATP2B4,BMP4,CACNA1B,CACNA1C,CACNA1G,CACNA1H,CACNA2D3,CACNB1,CACNB2,CACNG4,CASQ1,CASQ2,CAV1,CAV3,CNGA3,DAPK1,DLG4,DMD,DPP6,DYSF,EDNRA,F2R,FAM155A,FAM26E,FGF13,FGF2,FKBP1B,FLNA,FXYD1,FXYD6,FXYD7,GAL,GALR2,GJC2,HECW2,HPCA,HSPA2,ITGB1,JPH2,JPH3,KCNA2,KCNA5,KCNA6,KCNAB1,KCNB1,KCNC2,KCNC4,KCND2,KCND3,KCNE4,KCNF1,KCNG1,KCNH2,KCNIP2,KC…
GO:BP	regulation of cytosolic calcium ion concentration	GO:0051480	1.51655e-19	18.8191	390	1294	81	21354	ACKR3,ACKR4,ADCY5,ADCYAP1,ADCYAP1R1,AGTR1A,AKAP6,ANK2,APLNR,ATP1A2,ATP2B3,ATP2B4,BDKRB2,BMP4,C3AR1,C5AR1,CACNA1C,CACNA1G,CACNB2,CALB2,CASQ1,CASQ2,CAV1,CAV2,CAV3,CNR1,CX3CR1,DLG4,DMD,EDNRA,EDNRB,EPOR,ESR1,F2R,FAM155A,FGF2,FKBP1B,FXYD1,FZD2,GALR2,GATA2,GJA1,GPR20,GPR4,GRIA1,JPH2,JPH3,KCNA5,KCNK3,NCS1,NGF,NOL3,NOS1,NPY1R,NPY2R,NTSR1,OPRL1,P2RY6,PDGFRA,PKD2,PLN,PRKD1,PRKG1,PTGER1,PTGFR,PTGIR,PTH1R,RI…
GO:BP	regulation of response to stimulus	GO:0048583	1.72408e-19	18.7634	3852	1294	373	21354	9330182L06RIK,ACKR3,ACTA2,ACVRL1,ADAMTS18,ADCYAP1,ADCYAP1R1,ADGRA2,ADGRG3,ADRA2B,ADRA2C,AFAP1L2,AGTR1A,AKAP12,AKAP6,ALDH1A3,ANGPT1,ANXA1,AOAH,AOC3,APBB1,APC2,APLN,APLNR,APOD,ARHGAP44,ARHGEF25,ARTN,ASPN,ATP2B4,AXL,BACE1,BCL6B,BDKRB2,BEND6,BMP4,BMP5,BMPER,C1QTNF2,C1QTNF3,C1QTNF9,C1RA,C1RL,C1S1,C3AR1,C5AR1,C6,C7,CACNG4,CADM1,CADM4,CALCRL,CASP12,CASQ1,CAV1,CAV2,CAV3,CCBE1,CCDC3,CD109,CD200,CDH13,CDH2…
GO:BP	inorganic cation transmembrane transport	GO:0098662	2.68068e-19	18.5718	775	1294	122	21354	ABCC9,AGTR1A,AKAP6,AMIGO1,ANK2,APLNR,ASIC2,ASIC4,ATP1A2,ATP1B2,ATP2B3,ATP2B4,BMP4,CACNA1B,CACNA1C,CACNA1G,CACNA1H,CACNA2D3,CACNB1,CACNB2,CACNG4,CASQ1,CASQ2,CAV1,CAV3,CNGA3,DMD,DPP6,DYSF,EDNRA,F2R,FAM155A,FGF13,FGF2,FKBP1B,FLNA,FXYD1,FXYD6,FXYD7,GAL,GALR2,GJC2,HECW2,HPCA,HSPA2,ITGB1,JPH2,JPH3,KCNA2,KCNA5,KCNA6,KCNAB1,KCNB1,KCNC2,KCNC4,KCND2,KCND3,KCNE4,KCNF1,KCNG1,KCNH2,KCNIP2,KCNIP4,KCNJ10,KCNJ12…
GO:BP	morphogenesis of an epithelium	GO:0002009	6.77098e-19	18.1693	541	1294	97	21354	ACVRL1,AGTR1A,ALDH1A3,ANGPT1,ASTN2,BMP4,BMP5,BRSK1,BRSK2,CAV3,CC2D2A,COL5A1,CXCL12,CYP7B1,DAB2,DACT1,DCHS1,EDNRA,ENAH,ENG,EPHA7,ESR1,FAT4,FERMT2,FGF1,FGF2,FGF7,FGFR1,FLNA,FOXF1,FOXF2,FREM2,FRZB,FZD1,FZD2,GDNF,GJA1,GLI2,GLI3,GPC3,GREM1,HAND1,HAND2,HGF,HHIP,HOXA5,HOXB2,ID4,IGF1,IGFBP5,KDR,KIF26B,KRT17,LAMA1,MAGED1,MMP2,MYO9A,NFATC4,NKD1,NOG,NPNT,NRP1,NTN1,OSR1,PDGFRA,PHLDB2,PKD2,PLEKHA4,PODXL,PRICK…
GO:BP	cell morphogenesis involved in differentiation	GO:0000904	1.04927e-18	17.9791	767	1294	120	21354	ADARB1,ADCY1,AMIGO1,ANTXR1,APBB1,ARHGAP44,ARTN,ATL1,AXL,BBS1,BOC,BRSK1,BRSK2,BVES,CCDC141,CDH11,CDH2,CDKL5,CHL1,CHN1,CHODL,CHRNA3,CNTN5,COL18A1,CTNNA2,CXCL12,DACT1,DLG4,DMTN,EFNA5,ELAVL4,ENAH,EPHA7,ETV1,FERMT2,FLNA,FLRT2,FN1,FRMD6,GAP43,GAS1,GDNF,GLI2,GLI3,HAS2,HECW2,ITGA8,ITGB1,KANK1,KIF1A,KIF5A,KIF5C,LAMA1,LAMA2,LAMB1,LAMB2,LAMC3,LHFPL5,LIMS2,LRRC4C,MAP1B,MAPK8IP2,MAPT,MGLL,MYH10,NDN,NEFL,NEXN,…
GO:BP	regulation of cellular component organization	GO:0051128	1.16437e-18	17.9339	2428	1294	263	21354	ACVRL1,ADAMTS1,ADCYAP1,ADGRB2,ADGRL1,ADGRL3,AEBP1,AKAP6,AMIGO1,ANGPT1,ANK1,ANTXR1,ANXA1,APBB1,APLN,APOD,ARHGAP44,ARHGAP6,ARHGEF15,ARHGEF9,ASIC2,ATP1B2,AXL,BMP4,BMP5,BRSK1,BRSK2,CALY,CAV1,CAV2,CAV3,CBLN2,CCDC8,CDC42EP3,CDH13,CDH2,CDH5,CDKL5,CFL2,CHADL,CHN1,CHODL,CHRNA3,CLIP3,CLSTN2,CLSTN3,CNR1,CNTN1,COL14A1,COL16A1,COL5A1,CPEB1,CPLX1,CRYAB,CSPG4,CTGF,CTNNA2,CXCL12,DAB2,DACT1,DACT3,DCBLD2,DCN,DDR2,…
GO:BP	positive regulation of developmental process	GO:0051094	1.32669e-18	17.8772	1409	1294	179	21354	9330182L06RIK,ACVRL1,ADGRB2,ADGRL1,ADGRL3,ADRA2B,ADRA2C,AGTR1A,AKAP6,AMIGO1,ANXA1,APLNR,ASIC2,ATOH8,AXL,BEND6,BMP4,BMP5,BMPER,BOC,C3AR1,C5AR1,C6,CAV3,CBLN2,CCBE1,CCDC3,CDH5,CDKL5,CHODL,CLSTN2,CLSTN3,COL1A1,CTGF,CX3CR1,CXCL12,CYP1B1,DAB2,DACT1,DCN,DDR2,DLG4,DMD,DMTN,ECM1,EDNRA,EFNA5,EHD2,ELAVL4,ENG,F3,FERMT2,FEZ1,FGF1,FGF18,FGF2,FGFR1,FKBP1B,FLNA,FLRT2,FLT1,FN1,FRZB,GAL,GATA2,GDF10,GDNF,GFAP,GJA1,…
GO:BP	brain development	GO:0007420	1.85162e-18	17.7324	762	1294	119	21354	ADCY1,ADCYAP1,ADGRL3,AK4,ALDH1A3,AMIGO1,APOD,ATP1A2,ATP1B2,ATP2B4,AXL,B4GALT2,BBS1,BBS7,BMP4,BMP5,C5AR1,CCDC141,CDH2,CERS1,CHRD,CNTN1,CNTNAP2,COL3A1,CRTAC1,CTNNA2,CXCL12,DMD,EFNA5,ELAVL4,EML1,EPHA7,EPOR,FAIM2,FAT4,FEZ1,FGF13,FGF2,FGFR1,FLNA,FOXP2,FUT10,GABRB3,GAS1,GATA2,GJC2,GLI2,GLI3,GNAO1,GPR37L1,H2AFY2,HNMT,HOXB2,HPCA,ID4,IGF1,ITGA8,ITGB1,KCNAB1,KCNC2,KCNK3,KIF1A,LAMB1,MAST1,MEIS1,MYH10,NDRG4,…
GO:BP	positive regulation of cellular component movement	GO:0051272	1.8795e-18	17.726	605	1294	103	21354	ACKR3,ACTA2,ADAMTS1,ADGRA2,AKAP12,AMOTL1,ANGPT1,ANXA1,AOC3,ATOH8,BMP4,C3AR1,C5AR1,CALY,CAV1,CCBE1,CD99L2,CDH13,CDH5,COL18A1,COL1A1,CPEB1,CX3CR1,CXCL12,CXCL14,CYP1B1,DAB2,DDR2,DMTN,DOCK4,DYSF,EDNRA,F2R,FAM107A,FERMT2,FEZ1,FGF1,FGF18,FGF2,FGF7,FGFR1,FLNA,FLT1,FLT4,FN1,FOXF1,GATA2,HAS2,HGF,HSPB1,IGF1,IGF1R,IGFBP5,IL1R1,ITGB1,JAM2,JAM3,KDR,LAMB1,LGMN,MCAM,MMP2,MYLK,NOS3,NRP1,NTN1,P2RY6,PDGFD,PDGFRA,P…
GO:BP	cell population proliferation	GO:0008283	2.13304e-18	17.671	2086	1294	235	21354	ACVRL1,ADAMTS1,ADARB1,ADCYAP1,AGTR1A,ANGPT1,ANXA1,APLN,APLNR,APOD,ATOH8,BBS1,BCL6B,BDKRB2,BMP4,BMP5,BMPER,C3AR1,C5AR1,CADM4,CALCRL,CAV1,CAV2,CAV3,CD109,CD248,CDH13,CDH2,CDH3,CDH5,CHRD,CNN1,CNTFR,COL18A1,COL8A1,COL8A2,CPEB1,CRIP2,CSPG4,CTGF,CX3CR1,CXCL12,CYP1B1,CYP7B1,DBH,DCHS1,DDR2,DLC1,DMD,DPT,DYSF,ECM1,EDNRA,EDNRB,EFEMP1,EML1,ENG,EPOR,ESR1,F2R,F3,FAM19A1,FAM83D,FAT4,FBLN5,FBXO2,FERMT2,FGF1,FGF1…
GO:BP	positive regulation of cell motility	GO:2000147	2.44294e-18	17.6121	588	1294	101	21354	ACKR3,ACTA2,ADAMTS1,ADGRA2,AKAP12,AMOTL1,ANGPT1,ANXA1,AOC3,ATOH8,BMP4,C3AR1,C5AR1,CAV1,CCBE1,CD99L2,CDH13,CDH5,COL18A1,COL1A1,CPEB1,CX3CR1,CXCL12,CXCL14,CYP1B1,DAB2,DDR2,DMTN,DOCK4,DYSF,EDNRA,F2R,FAM107A,FERMT2,FGF1,FGF18,FGF2,FGF7,FGFR1,FLNA,FLT1,FLT4,FN1,FOXF1,GATA2,HAS2,HGF,HSPB1,IGF1,IGF1R,IGFBP5,IL1R1,ITGB1,JAM2,JAM3,KDR,LAMB1,LGMN,MCAM,MMP2,MYLK,NOS3,NRP1,NTN1,P2RY6,PDGFD,PDGFRA,PDGFRB,PLAU…
GO:BP	heart contraction	GO:0060047	2.79001e-18	17.5544	231	1294	59	21354	ABCC9,AKAP6,ANK2,APLN,ATP1A2,ATP2B4,BVES,CACNA1B,CACNA1C,CACNA1G,CACNB2,CASQ2,CAV1,CAV3,CHRM2,CTGF,CTNNA3,DMD,DMPK,FGF13,FKBP1B,FLNA,FXYD1,GJA1,GJA5,GJC1,GJD3,GNAO1,HEY2,KCNA5,KCND3,KCNE4,KCNH2,KCNJ5,KCNJ8,MYL1,NOS1,NOS3,PLN,POPDC2,PRKG1,RGS4,RNF207,RYR2,SCN1B,SCN5A,SEMA3A,SGCD,SLC4A3,SLC8A1,SMTN,STC1,TACR3,TBX2,TGFB2,TNNT2,TPM1,TRDN,VEGFB
GO:BP	cellular calcium ion homeostasis	GO:0006874	3.76328e-18	17.4244	489	1294	90	21354	ACKR3,ACKR4,ADCY5,ADCYAP1,ADCYAP1R1,AGTR1A,AKAP6,ANK2,APLNR,ATP1A2,ATP2B3,ATP2B4,BDKRB2,BMP4,C3AR1,C5AR1,CACNA1C,CACNA1G,CACNB2,CALB2,CASQ1,CASQ2,CAV1,CAV2,CAV3,CDH5,CNR1,CX3CR1,DLG4,DMD,DMPK,EDNRA,EDNRB,EPOR,ESR1,F2R,FAM155A,FGF2,FKBP1B,FXYD1,FZD2,GALR2,GATA2,GJA1,GPR20,GPR4,GRIA1,JPH2,JPH3,KCNA5,KCNK3,KCTD17,MICU3,NCS1,NGF,NOL3,NOS1,NPY1R,NPY2R,NTSR1,OPRL1,P2RY6,PDGFRA,PKD2,PLN,PRKD1,PRKG1,PTGE…
GO:BP	heart process	GO:0003015	5.11588e-18	17.2911	241	1294	60	21354	ABCC9,AKAP6,ANK2,APLN,ATP1A2,ATP2B4,BVES,CACNA1B,CACNA1C,CACNA1G,CACNB2,CASQ2,CAV1,CAV3,CHRM2,CTGF,CTNNA3,DMD,DMPK,FGF13,FKBP1B,FLNA,FXYD1,GJA1,GJA5,GJC1,GJD3,GNAO1,HEY2,KCNA5,KCND3,KCNE4,KCNH2,KCNJ5,KCNJ8,MYL1,NOS1,NOS3,PLN,POPDC2,PRKG1,RGS4,RNF207,RYR2,SCN1B,SCN5A,SEMA3A,SGCD,SLC4A3,SLC8A1,SMTN,STC1,TACR3,TBX2,TGFB2,TNNT2,TPM1,TRDN,VEGFB,WWTR1
GO:BP	regulation of heart contraction	GO:0008016	5.42521e-18	17.2656	191	1294	53	21354	ABCC9,AKAP6,ANK2,APLN,ATP1A2,ATP2B4,BVES,CACNA1B,CACNA1C,CACNA1G,CACNB2,CASQ2,CAV1,CAV3,CHRM2,CTGF,CTNNA3,DMD,DMPK,FGF13,FKBP1B,FLNA,FXYD1,GJA1,GJA5,GJC1,GJD3,GNAO1,HEY2,KCNA5,KCND3,KCNE4,KCNH2,KCNJ5,NOS1,NOS3,PLN,POPDC2,PRKG1,RGS4,RYR2,SCN1B,SCN5A,SEMA3A,SLC4A3,SLC8A1,SMTN,STC1,TACR3,TBX2,TGFB2,TNNT2,TPM1
GO:BP	regulation of cellular response to growth factor stimulus	GO:0090287	6.43672e-18	17.1913	288	1294	66	21354	9330182L06RIK,ACVRL1,ADGRA2,ANGPT1,APLN,ASPN,ATP2B4,BMP4,BMPER,CADM4,CAV1,CAV2,CAV3,CCBE1,CD109,CDH5,CHRD,CHRDL1,CIDEA,DAB2,DCN,DMD,EMILIN1,ENG,EPN2,FBN1,FGF1,FGF18,FGF2,FGFR1,FSTL1,FSTL3,FZD1,GPC3,GRB10,GREM1,GREM2,HHIP,HTRA3,ITGA8,LTBP1,MMRN2,MYOCD,MYOF,NGF,NOG,NPNT,PEG10,RBPMS2,RGMA,ROBO1,SFRP1,SLIT2,SPRY1,SPRY4,TEK,TGFB1I1,TGFB3,TGFBR3,TMEM204,TWSG1,VASN,VEGFB,WFIKKN2,ZEB1,ZFP423
GO:BP	response to wounding	GO:0009611	7.10969e-18	17.1481	521	1294	93	21354	ACTA2,ACVRL1,ADAMTS18,ADRA2B,ADRA2C,ANXA1,APOD,AXL,CADM4,CAV1,CAV3,CCM2L,CD109,CDH3,CFH,CHL1,COL1A1,COL3A1,COL5A1,DCBLD2,DCN,DMTN,DYSF,ENG,F13A1,F2R,F3,FERMT2,FGF1,FGF2,FGF7,FGFR2,FKBP10,FKBP1B,FLNA,FN1,FOXF1,GAP43,GATA2,GDNF,GFAP,GJA1,GLI3,GPR4,IGF1,ITGA9,ITGB1,JAM3,KANK1,KCNK2,KDR,LAMB2,MAP1B,MCAM,MMP2,MMRN1,MORN4,MUSTN1,MYH10,MYLK,MYOF,NEFL,NOG,NOL3,NRP1,PDGFRA,PDGFRB,PHLDB2,PLAU,PLPP3,POSTN,P…
GO:BP	positive regulation of cell communication	GO:0010647	7.27015e-18	17.1385	1726	1294	204	21354	9330182L06RIK,ACKR3,ACTA2,ACVRL1,ADCY1,ADCYAP1,ADCYAP1R1,ADGRA2,ADRA2B,ADRA2C,AFAP1L2,AGTR1A,AKAP12,AKAP6,ALDH1A3,ANGPT1,APLN,AXL,BMP4,BMP5,BMPER,C1QTNF2,C1QTNF3,C5AR1,CACNA1B,CACNB2,CACNG4,CALB2,CAV1,CAV2,CCBE1,CDH13,CDH2,CDH3,CDH5,CERS1,CLSTN2,CLSTN3,CNR1,COL1A1,COL3A1,CSPG4,CTGF,CX3CR1,CYP1B1,DAAM2,DAB2,DACT1,DCN,DKK2,DLG4,DMTN,DOC2B,EDA,EDAR,EDNRA,ENG,ENHO,EPN2,EPOR,ESR1,EVC,F2R,F3,FAM107A,FE…
GO:BP	calcium ion homeostasis	GO:0055074	7.5468e-18	17.1222	503	1294	91	21354	ACKR3,ACKR4,ADCY5,ADCYAP1,ADCYAP1R1,AGTR1A,AKAP6,ANK2,APLNR,ATP1A2,ATP2B3,ATP2B4,BDKRB2,BMP4,C3AR1,C5AR1,CACNA1C,CACNA1G,CACNB2,CALB2,CASQ1,CASQ2,CAV1,CAV2,CAV3,CDH5,CNR1,CX3CR1,DLG4,DMD,DMPK,EDNRA,EDNRB,EPOR,ESR1,F2R,FAM155A,FGF2,FKBP1B,FXYD1,FZD2,GALR2,GATA2,GJA1,GPR20,GPR4,GRIA1,JPH2,JPH3,KCNA5,KCNK3,KCTD17,MICU3,NCS1,NGF,NOL3,NOS1,NPY1R,NPY2R,NTSR1,OPRL1,P2RY6,PDGFRA,PKD2,PLN,PRKD1,PRKG1,PTGE…
GO:BP	cellular response to organic substance	GO:0071310	7.94721e-18	17.0998	2461	1294	263	21354	9330182L06RIK,ABCG4,ACKR1,ACKR3,ACKR4,ACVRL1,ADAMTS7,ADCY1,ADCY5,ADCYAP1,ADGRA2,AGTR1A,AKAP12,AKAP6,AMIGO1,ANGPT1,ANXA1,APLN,ASPN,ATP1A2,ATP2B4,AXL,BACE1,BMP4,BMP5,BMPER,BRSK2,C1QTNF9,CACNA1H,CACNB1,CADM4,CALCRL,CALY,CASP12,CASQ2,CAV1,CAV2,CAV3,CCBE1,CCDC3,CD109,CDH5,CERS1,CHRD,CHRDL1,CHRM2,CIDEA,CLEC3B,CNTFR,COL16A1,COL1A1,COL1A2,COL3A1,COL5A2,COL6A1,COLEC12,CPEB1,CTGF,CX3CR1,CXCL12,CYP1B1,CYP7B…
GO:BP	cell morphogenesis	GO:0000902	9.21132e-18	17.0357	1062	1294	146	21354	ADARB1,ADCY1,AMIGO1,ANTXR1,ANXA1,APBB1,ARHGAP44,ARTN,ATL1,AXL,BBS1,BOC,BRSK1,BRSK2,BVES,CADM1,CAP2,CCDC141,CDC42EP3,CDH11,CDH19,CDH2,CDH5,CDH6,CDKL5,CHL1,CHN1,CHODL,CHRNA3,CNTN5,CNTNAP2,COL18A1,CTNNA2,CXCL12,DACT1,DCHS1,DLC1,DLG4,DMD,DMTN,EFNA5,ELAVL4,ENAH,EPHA7,ETV1,FERMT2,FGD1,FLNA,FLRT2,FN1,FRMD6,GAP43,GAS1,GDNF,GJA1,GLI2,GLI3,GREM1,HAS2,HECW2,HGF,ITGA8,ITGB1,KANK1,KDR,KIF1A,KIF5A,KIF5C,LAMA1,…
GO:BP	ion transmembrane transport	GO:0034220	1.05808e-17	16.9755	1355	1294	172	21354	ABCC9,AGTR1A,AKAP6,AMIGO1,ANK2,ANO2,AOC3,APLNR,ASIC2,ASIC4,ATP1A2,ATP1B2,ATP2B3,ATP2B4,BMP4,C1QTNF2,CACNA1B,CACNA1C,CACNA1G,CACNA1H,CACNA2D3,CACNB1,CACNB2,CACNG4,CASQ1,CASQ2,CAV1,CAV3,CHRNA3,CHRNA5,CLIP3,CNGA3,DAPK1,DLG4,DMD,DPP6,DYSF,EDNRA,ESR1,F2R,FAM155A,FAM26E,FGF13,FGF2,FKBP1B,FLNA,FXYD1,FXYD6,FXYD7,GABRB3,GAL,GALR2,GFAP,GJA1,GJA5,GJC1,GJC2,GJD3,GLRB,GPC3,GRB10,GRIA1,GRIA3,GRIA4,GRIK3,HECW2,…
GO:BP	positive regulation of signaling	GO:0023056	1.09928e-17	16.9589	1732	1294	204	21354	9330182L06RIK,ACKR3,ACTA2,ACVRL1,ADCY1,ADCYAP1,ADCYAP1R1,ADGRA2,ADRA2B,ADRA2C,AFAP1L2,AGTR1A,AKAP12,AKAP6,ALDH1A3,ANGPT1,APLN,AXL,BMP4,BMP5,BMPER,BVES,C1QTNF2,C1QTNF3,C5AR1,CACNA1B,CACNB2,CACNG4,CALB2,CAV1,CAV2,CCBE1,CDH13,CDH2,CDH3,CDH5,CERS1,CLSTN2,CLSTN3,CNR1,COL1A1,COL3A1,CSPG4,CTGF,CX3CR1,CYP1B1,DAAM2,DAB2,DACT1,DCN,DKK2,DLG4,DMTN,DOC2B,EDA,EDAR,EDNRA,ENG,ENHO,EPN2,EPOR,ESR1,EVC,F2R,F3,FAM10…
GO:BP	regulation of cell population proliferation	GO:0042127	1.16282e-17	16.9345	1769	1294	207	21354	ACVRL1,ADAMTS1,ADARB1,ADCYAP1,AGTR1A,ANGPT1,ANXA1,APLN,APLNR,APOD,ATOH8,BCL6B,BDKRB2,BMP4,BMP5,C3AR1,C5AR1,CADM4,CALCRL,CAV1,CAV2,CAV3,CD109,CD248,CDH13,CDH2,CDH3,CDH5,CHRD,CNN1,CNTFR,COL18A1,CPEB1,CRIP2,CTGF,CX3CR1,CXCL12,CYP1B1,CYP7B1,DBH,DDR2,DLC1,DMD,DPT,DYSF,ECM1,EDNRA,EDNRB,EFEMP1,ENG,EPOR,ESR1,F2R,F3,FAM19A1,FBLN5,FBXO2,FERMT2,FGF1,FGF18,FGF2,FGF7,FGFR1,FGFR2,FLNA,FLT1,FLT4,FN1,FOXF1,FOXP2…
GO:BP	response to organic substance	GO:0010033	1.20756e-17	16.9181	3434	1294	336	21354	9330182L06RIK,ABCC9,ABCG4,ACKR1,ACKR3,ACKR4,ACVRL1,ADAMTS7,ADCY1,ADCY5,ADCYAP1,ADCYAP1R1,ADGRA2,ADGRL3,AGTR1A,AKAP12,AKAP6,AMIGO1,ANGPT1,ANK2,ANXA1,APLN,ASPN,ATP1A2,ATP2B4,AXL,BACE1,BMP4,BMP5,BMPER,BRSK2,C1QTNF9,C5AR1,CACNA1B,CACNA1H,CACNB1,CACNG4,CADM4,CALCRL,CALY,CASP12,CASQ1,CASQ2,CAV1,CAV2,CAV3,CCBE1,CCDC3,CD109,CDH13,CDH5,CERS1,CFH,CHRD,CHRDL1,CHRM2,CHRNA3,CIDEA,CLEC3B,CNGA3,CNR1,CNTFR,COL16…
GO:BP	transport	GO:0006810	1.28607e-17	16.8907	4550	1294	416	21354	ABCA8A,ABCA9,ABCC9,ABCG4,ACKR3,ACKR4,ADCY1,ADCY5,ADCYAP1,ADCYAP1R1,AGTR1A,AKAP12,AKAP6,AMIGO1,ANGPT1,ANK1,ANK2,ANO2,ANTXR1,ANXA1,AOC3,AP3B2,APBA1,APBB1,APLN,APLNR,APOD,APOL10B,APOL7C,APOLD1,ARHGAP44,ARMCX3,ASIC2,ASIC4,ASTN2,ATP10A,ATP1A2,ATP1B2,ATP2B3,ATP2B4,AXL,BACE1,BBS1,BBS7,BDKRB2,BMP4,BRSK1,BRSK2,BVES,C1QTNF2,C1QTNF3,CACNA1B,CACNA1C,CACNA1G,CACNA1H,CACNA2D3,CACNB1,CACNB2,CACNG4,CADPS,CALCRL,…
GO:BP	negative regulation of biological process	GO:0048519	1.33372e-17	16.8749	5611	1294	489	21354	9330182L06RIK,ACKR3,ACVRL1,ADAMTS1,ADAMTS18,ADAMTS7,ADARB1,ADCYAP1,ADCYAP1R1,ADGRA2,ADGRB2,ADGRF5,ADGRG3,ADRA2C,AEBP1,AGTR1A,AKAP6,ANGPT1,ANK2,ANTXR1,ANXA1,AOAH,APBB1,APC2,APLN,APLNR,APOD,ARHGAP44,ARHGAP6,ARHGEF15,ASIC2,ASPN,ASTN2,ATOH8,ATP1A2,ATP1B2,ATP2B4,AXL,BACE1,BAG2,BCL6B,BDKRB2,BEND6,BMP4,BMP5,BMPER,BRSK1,C1QTNF3,C5AR1,CACNA1C,CADM4,CALCRL,CASQ1,CASQ2,CAV1,CAV2,CAV3,CCDC3,CCDC8,CCM2L,CD109…
GO:BP	establishment of localization	GO:0051234	1.40286e-17	16.853	4695	1294	426	21354	ABCA8A,ABCA9,ABCC9,ABCG4,ACKR3,ACKR4,ADCY1,ADCY5,ADCYAP1,ADCYAP1R1,AGTR1A,AKAP12,AKAP6,AMIGO1,ANGPT1,ANK1,ANK2,ANO2,ANTXR1,ANXA1,AOC3,AP3B2,APBA1,APBB1,APLN,APLNR,APOD,APOL10B,APOL7C,APOLD1,ARHGAP44,ARMCX3,ASIC2,ASIC4,ASTN2,ATP10A,ATP1A2,ATP1B2,ATP2B3,ATP2B4,AXL,BACE1,BBS1,BBS7,BDKRB2,BMP4,BRSK1,BRSK2,BVES,C1QTNF2,C1QTNF3,CACNA1B,CACNA1C,CACNA1G,CACNA1H,CACNA2D3,CACNB1,CACNB2,CACNG4,CADPS,CALCRL,…
GO:BP	positive regulation of cell migration	GO:0030335	1.701e-17	16.7693	565	1294	97	21354	ACKR3,ACTA2,ADAMTS1,ADGRA2,AKAP12,AMOTL1,ANGPT1,ANXA1,AOC3,ATOH8,BMP4,C3AR1,C5AR1,CAV1,CCBE1,CD99L2,CDH13,CDH5,COL18A1,COL1A1,CPEB1,CX3CR1,CXCL12,CXCL14,CYP1B1,DAB2,DDR2,DMTN,DOCK4,DYSF,EDNRA,F2R,FAM107A,FERMT2,FGF1,FGF18,FGF2,FGF7,FGFR1,FLNA,FLT1,FLT4,FN1,FOXF1,GATA2,HAS2,HGF,HSPB1,IGF1,IGF1R,IGFBP5,IL1R1,ITGB1,JAM2,JAM3,KDR,LAMB1,LGMN,MCAM,MMP2,MYLK,NOS3,NRP1,P2RY6,PDGFD,PDGFRA,PDGFRB,PLAU,PLP1…
GO:BP	cellular component morphogenesis	GO:0032989	1.73041e-17	16.7619	803	1294	121	21354	ADARB1,ADCY1,AMIGO1,ANK2,APBB1,ARHGAP44,ARTN,ATL1,BOC,BRSK1,BRSK2,CASQ1,CASQ2,CAV3,CCDC141,CDH11,CDH2,CDKL5,CFL2,CHL1,CHN1,CHODL,CHRNA3,CNTN5,CNTNAP2,CSRP1,CTNNA2,CXCL12,DACT1,DLG4,DMD,EFNA5,ELAVL4,ENAH,EPHA7,ETV1,FEZ1,FHOD3,FLRT2,FN1,GAP43,GAS1,GDNF,GJA1,GLI2,GLI3,HECW2,ITGB1,KANK1,KIF1A,KIF5A,KIF5C,LAMA1,LAMA2,LAMB2,LIFR,LRRC4C,MAP1B,MAPK8IP2,MAPT,MGLL,MYH10,MYO9A,NDN,NEFL,NES,NEXN,NFATC4,NGF,N…
GO:BP	modulation of chemical synaptic transmission	GO:0050804	2.06672e-17	16.6847	501	1294	90	21354	ADCY1,ADCYAP1,AKAP12,APBA1,BACE1,BRSK1,CACNA1B,CACNB2,CACNG4,CALB2,CDH11,CDH2,CELF4,CHRM2,CHRNA3,CHRNA5,CLSTN2,CLSTN3,CNR1,CPEB1,CPLX1,CX3CR1,DGKB,DLG4,DMPK,ELAVL4,F2R,FAM107A,GABBR1,GFAP,GNAI1,GRIA1,GRIA4,GRIK3,ITGB1,JPH3,JPH4,KCNB1,KCNC4,KCNJ10,KCNQ4,LAMA2,LGMN,LRRC4C,LRRTM1,MAP1B,MAPK8IP2,MAPT,MGLL,MPP2,MUSK,NCS1,NFATC4,NGF,NLGN2,NOS1,NPTX1,NPTX2,NPTXR,NPY2R,NSG1,PCDH17,PHF24,PLCB1,PLCB4,PLCL1…
GO:BP	regulation of trans-synaptic signaling	GO:0099177	2.37502e-17	16.6243	502	1294	90	21354	ADCY1,ADCYAP1,AKAP12,APBA1,BACE1,BRSK1,CACNA1B,CACNB2,CACNG4,CALB2,CDH11,CDH2,CELF4,CHRM2,CHRNA3,CHRNA5,CLSTN2,CLSTN3,CNR1,CPEB1,CPLX1,CX3CR1,DGKB,DLG4,DMPK,ELAVL4,F2R,FAM107A,GABBR1,GFAP,GNAI1,GRIA1,GRIA4,GRIK3,ITGB1,JPH3,JPH4,KCNB1,KCNC4,KCNJ10,KCNQ4,LAMA2,LGMN,LRRC4C,LRRTM1,MAP1B,MAPK8IP2,MAPT,MGLL,MPP2,MUSK,NCS1,NFATC4,NGF,NLGN2,NOS1,NPTX1,NPTX2,NPTXR,NPY2R,NSG1,PCDH17,PHF24,PLCB1,PLCB4,PLCL1…
GO:BP	transmembrane transport	GO:0055085	2.52877e-17	16.5971	1553	1294	188	21354	ABCA8A,ABCA9,ABCC9,ABCG4,AGTR1A,AKAP6,AMIGO1,ANK2,ANO2,AOC3,APLNR,ASIC2,ASIC4,ATP1A2,ATP1B2,ATP2B3,ATP2B4,BMP4,C1QTNF2,CACNA1B,CACNA1C,CACNA1G,CACNA1H,CACNA2D3,CACNB1,CACNB2,CACNG4,CASQ1,CASQ2,CAV1,CAV3,CHRNA3,CHRNA5,CLIP3,CNGA3,DAPK1,DLG4,DMD,DPP6,DYSF,EDNRA,ESR1,F2R,FAM155A,FAM26E,FGF13,FGF2,FKBP1B,FLNA,FXYD1,FXYD6,FXYD7,GABRB3,GAL,GALR2,GFAP,GJA1,GJA5,GJC1,GJC2,GJC3,GJD3,GLRB,GPC3,GRB10,GRIA1,…
GO:BP	negative regulation of cellular process	GO:0048523	2.65332e-17	16.5762	5115	1294	454	21354	ACKR3,ACVRL1,ADAMTS18,ADAMTS7,ADARB1,ADCYAP1,ADCYAP1R1,ADGRA2,ADGRF5,ADGRG3,AEBP1,AGTR1A,AKAP6,ANGPT1,ANK2,ANTXR1,ANXA1,APBB1,APC2,APLN,APLNR,APOD,ARHGAP44,ARHGAP6,ARHGEF15,ASIC2,ASPN,ASTN2,ATOH8,ATP1A2,ATP1B2,ATP2B4,AXL,BAG2,BCL6B,BDKRB2,BEND6,BMP4,BMP5,BMPER,BRSK1,C1QTNF3,C5AR1,CACNA1C,CADM4,CASQ1,CASQ2,CAV1,CAV2,CAV3,CCDC3,CCDC8,CCM2L,CD109,CD200,CDH13,CDH2,CDH5,CELF4,CERS1,CHADL,CHL1,CHRD,CHR…
GO:BP	regulation of transmembrane transporter activity	GO:0022898	3.03426e-17	16.5179	280	1294	64	21354	AKAP6,AMIGO1,ANK2,ASIC2,ATP1A2,ATP1B2,BMP4,CACNB1,CACNB2,CACNG4,CASQ1,CASQ2,CAV1,CAV3,DAPK1,DLG4,DMD,DYSF,FGF13,FKBP1B,FXYD1,FXYD6,FXYD7,GAL,GALR2,GJA1,HECW2,HPCA,HSPA2,HTR3A,HTR3B,ITGB1,JPH2,JPH3,KCNAB1,KCNC2,KCNE4,KCNG1,LRRC55,MAPK8IP2,NLGN2,NTSR1,OPRL1,OSR1,P2RY6,PIRT,PKD2,PLCB1,PLN,PRKG1,REM1,RNF207,RPH3A,RYR2,SCN1B,SHANK3,SHISA6,SLC25A4,SNCA,STAC,TCAF1,TRDN,TRPC6,TWIST1
GO:BP	response to endogenous stimulus	GO:0009719	4.34398e-17	16.3621	1620	1294	193	21354	9330182L06RIK,ACVRL1,ADAMTS7,ADCY5,ADCYAP1,AGTR1A,AKAP6,AMIGO1,ANXA1,APLN,ASPN,ATP1A2,ATP2B4,BACE1,BMP4,BMP5,BMPER,C1QTNF9,CACNA1H,CACNB1,CALY,CASQ2,CAV1,CAV2,CAV3,CD109,CDH13,CDH5,CERS1,CHRD,CHRDL1,CHRM2,CIDEA,CLEC3B,CNGA3,COL16A1,COL1A1,COL1A2,COL3A1,COL5A2,COL6A1,CPEB1,CTGF,CX3CR1,CXCL12,CYP7B1,DAB2,DHH,DMTN,EDNRB,EFNA5,EIF4EBP1,ELAVL4,EMILIN1,ENG,ENHO,ESR1,FABP3,FAM107A,FAT4,FBN1,FERMT2,FGF1,…
GO:BP	mesenchyme development	GO:0060485	8.03276e-17	16.0951	277	1294	63	21354	ACTA2,ACTG2,ACVRL1,BMP4,BMP5,BNC2,CDH2,COL1A1,DAB2,DACT3,DCHS1,EDNRA,EDNRB,ENG,FAM83D,FERMT2,FGFR1,FGFR2,FLNA,FN1,FOXF1,FRZB,GDNF,GJA1,GREM1,HAND1,HAND2,HAS2,HEY2,HOXA5,LOXL2,MYOCD,NOG,NOS3,NRP1,NRP2,OLFM1,OSR1,PDGFRB,PHLDB2,PHOX2B,PKD2,PTK7,RBM24,SEMA3A,SEMA3F,SEMA3G,SFRP1,SMO,SNAI1,SNAI2,SOX10,SPRY1,TBX2,TCF21,TGFB1I1,TGFB2,TGFB3,TGFBR3,TMEM100,TWIST1,VASN,WWTR1
GO:BP	regulation of transporter activity	GO:0032409	8.1491e-17	16.0889	293	1294	65	21354	AKAP6,AMIGO1,ANK2,ASIC2,ATP1A2,ATP1B2,BMP4,CACNB1,CACNB2,CACNG4,CASQ1,CASQ2,CAV1,CAV3,DAPK1,DLG4,DMD,DYSF,FGF13,FKBP1B,FXYD1,FXYD6,FXYD7,GAL,GALR2,GJA1,HECW2,HPCA,HSPA2,HTR3A,HTR3B,ITGB1,JPH2,JPH3,KCNAB1,KCNC2,KCNE4,KCNG1,LRRC55,MAPK8IP2,NLGN2,NTSR1,OPRL1,OSR1,P2RY6,PIRT,PKD2,PLCB1,PLN,PRKG1,REM1,RNF207,RPH3A,RYR2,SCN1B,SHANK3,SHISA6,SLC25A4,SNCA,STAC,SYNGR3,TCAF1,TRDN,TRPC6,TWIST1
GO:BP	embryo development	GO:0009790	1.05683e-16	15.976	1179	1294	154	21354	ACVRL1,ADGRF5,ALDH1A3,ANGPT1,APBA1,APLN,APLNR,ATOH8,BMP4,BMP5,C6,CACNA1C,CC2D2A,CELF4,CERS1,CHRD,COL12A1,COL1A1,COL5A1,COL5A2,COL6A1,COL8A1,COLEC10,DACT1,DCHS1,DSC3,DZIP1L,EDNRA,EFEMP1,ENAH,ENG,EPN2,EXOC3L2,FBN1,FGF2,FGFR1,FGFR2,FKBP10,FN1,FOXF1,FOXF2,FREM2,FRZB,FZD1,FZD2,GAS1,GATA2,GDNF,GJA1,GJA5,GLI2,GLI3,GPC3,GPR161,GREM1,GREM2,HAND1,HAND2,HEY2,HLX,HOXA5,HOXA7,HOXB2,HOXC4,HOXC6,HOXC9,IGF1,ITGA…
GO:BP	regulation of membrane potential	GO:0042391	1.28329e-16	15.8917	459	1294	84	21354	ADCYAP1,AKAP6,ANK2,ASIC2,ATP1B2,BVES,CACNA1C,CACNA1G,CACNA1H,CACNB2,CASQ2,CAV1,CAV3,CELF4,CHRNA3,CHRNA5,CNR1,CTNNA3,DCN,DLG4,DMD,DMPK,DPP6,FGF13,FKBP1B,FLNA,FXYD1,GABBR1,GABRB3,GJA1,GJA5,GLRB,GRIA1,GRIA3,GRIA4,GRIK3,HEBP2,HTR3B,KCNA2,KCNA5,KCNB1,KCNC2,KCNC4,KCND2,KCND3,KCNE4,KCNH2,KCNIP2,KCNJ10,KCNJ5,KCNJ8,KCNK13,KCNK2,KCNK3,KCNQ3,KDR,MAPK8IP2,MAPT,MPP2,NLGN2,NPY2R,NTSR1,P2RX6,PID1,PIEZO2,POPDC2,…
GO:BP	cellular divalent inorganic cation homeostasis	GO:0072503	1.59055e-16	15.7985	516	1294	90	21354	ACKR3,ACKR4,ADCY5,ADCYAP1,ADCYAP1R1,AGTR1A,AKAP6,ANK2,APLNR,ATP1A2,ATP2B3,ATP2B4,BDKRB2,BMP4,C3AR1,C5AR1,CACNA1C,CACNA1G,CACNB2,CALB2,CASQ1,CASQ2,CAV1,CAV2,CAV3,CDH5,CNR1,CX3CR1,DLG4,DMD,DMPK,EDNRA,EDNRB,EPOR,ESR1,F2R,FAM155A,FGF2,FKBP1B,FXYD1,FZD2,GALR2,GATA2,GJA1,GPR20,GPR4,GRIA1,JPH2,JPH3,KCNA5,KCNK3,KCTD17,MICU3,NCS1,NGF,NOL3,NOS1,NPY1R,NPY2R,NTSR1,OPRL1,P2RY6,PDGFRA,PKD2,PLN,PRKD1,PRKG1,PTGE…
GO:BP	negative regulation of multicellular organismal process	GO:0051241	2.83612e-16	15.5473	1079	1294	144	21354	9330182L06RIK,ACVRL1,ADAMTS1,ADAMTS18,ADAMTS7,ADCYAP1,ADGRB2,ADRA2C,ANGPT1,ANXA1,APLN,APOD,ASPN,ATP1A2,ATP2B4,AXL,BMP4,C1QTNF3,CALCRL,CAV3,CDH3,CHADL,CIDEA,CX3CR1,DAAM2,DACT3,DCN,DOCK4,ECM1,EFEMP1,EMILIN1,EPHA7,EPN2,F2R,FBLN5,FBN1,FGF2,FGFR1,FKBP1B,FN1,FRZB,FSTL3,GATA2,GFRA4,GJA1,GJA5,GLI2,GLI3,GPR149,GPR37L1,GPR4,GREM1,HEY2,HGF,HHIP,HLX,HOXA5,HOXA7,HSPB1,ID4,IGF1,IGFBP5,IL17D,JAM2,KCNC4,KCNK2,LA…
GO:BP	cellular response to endogenous stimulus	GO:0071495	2.96693e-16	15.5277	1329	1294	166	21354	9330182L06RIK,ACVRL1,ADAMTS7,ADCY5,ADCYAP1,AGTR1A,AKAP6,AMIGO1,ANXA1,APLN,ASPN,ATP1A2,ATP2B4,BACE1,BMP4,BMP5,BMPER,C1QTNF9,CACNA1H,CACNB1,CALY,CASQ2,CAV1,CAV2,CAV3,CD109,CDH5,CERS1,CHRD,CHRDL1,CHRM2,CIDEA,CLEC3B,COL16A1,COL1A1,COL1A2,COL3A1,COL5A2,COL6A1,CPEB1,CTGF,CX3CR1,CYP7B1,DAB2,DMTN,EFNA5,EIF4EBP1,ELAVL4,EMILIN1,ENG,ENHO,ESR1,FAM107A,FAT4,FBN1,FERMT2,FGF1,FGF18,FGF2,FGF7,FGFR1,FGFR2,FLNA,FL…
GO:BP	inorganic ion transmembrane transport	GO:0098660	3.24731e-16	15.4885	874	1294	125	21354	ABCC9,AGTR1A,AKAP6,AMIGO1,ANK2,ANO2,APLNR,ASIC2,ASIC4,ATP1A2,ATP1B2,ATP2B3,ATP2B4,BMP4,CACNA1B,CACNA1C,CACNA1G,CACNA1H,CACNA2D3,CACNB1,CACNB2,CACNG4,CASQ1,CASQ2,CAV1,CAV3,CNGA3,DMD,DPP6,DYSF,EDNRA,F2R,FAM155A,FGF13,FGF2,FKBP1B,FLNA,FXYD1,FXYD6,FXYD7,GABRB3,GAL,GALR2,GJC2,GLRB,HECW2,HPCA,HSPA2,ITGB1,JPH2,JPH3,KCNA2,KCNA5,KCNA6,KCNAB1,KCNB1,KCNC2,KCNC4,KCND2,KCND3,KCNE4,KCNF1,KCNG1,KCNH2,KCNIP2,KCN…
GO:BP	actin filament-based process	GO:0030029	3.85126e-16	15.4144	802	1294	118	21354	ABLIM2,ABLIM3,ACTA2,AKAP6,AMOTL1,ANK2,ANTXR1,ANXA1,APBB1,ARHGAP44,ARHGAP6,ARHGEF15,ARHGEF17,ATP1A2,BRSK2,CACNA1C,CACNA1G,CACNB2,CALD1,CAP2,CASQ1,CASQ2,CAV1,CAV3,CDC42EP3,CFL2,CNN1,CSRP1,CTGF,CTNNA2,CTNNA3,DAAM2,DLC1,DMTN,EFNA5,EFS,EHD2,ENAH,FAM107A,FERMT2,FGD1,FGF13,FGF7,FHOD3,FLNA,FLNC,FMN2,FRMD6,FXYD1,GAS2L2,GJA5,HIP1,INA,ITGB1,JAM3,JMY,KANK1,KANK2,KANK4,KCNA5,KCND3,KCNE4,KCNH2,KCNJ5,KCNJ8,KIRR…
GO:BP	epithelium development	GO:0060429	4.09207e-16	15.3881	1173	1294	152	21354	ACTA2,ACVRL1,ADAMTSL4,AGTR1A,ALDH1A3,ANGPT1,ANXA1,APOLD1,ASTN2,ATOH8,BMP4,BMP5,BMPER,BRSK1,BRSK2,CAV1,CAV3,CC2D2A,CD109,CDH2,CDH3,CDH5,CFH,COL18A1,COL5A1,CXCL12,CYP7B1,DAB2,DACT1,DCHS1,DMD,DZIP1L,EDA,EDAR,EDNRA,ENAH,ENG,EPHA7,EPOR,ESR1,FAT4,FERMT2,FGF1,FGF2,FGF7,FGFR1,FLNA,FOXF1,FOXF2,FOXP2,FREM2,FRMD6,FRZB,FSTL1,FZD1,FZD2,GAL,GAS1,GDNF,GJA1,GJA5,GLI2,GLI3,GPC3,GPR161,GPR4,GREM1,H2AFY2,HAND1,HAND…
GO:BP	neuron projection morphogenesis	GO:0048812	4.34553e-16	15.362	660	1294	104	21354	ADARB1,ADCY1,AMIGO1,APBB1,ARHGAP44,ARTN,ATL1,BOC,BRSK1,BRSK2,CCDC141,CDH11,CDH2,CDKL5,CHL1,CHN1,CHODL,CHRNA3,CNTN5,CNTNAP2,CTNNA2,CXCL12,DACT1,DLG4,DMD,EFNA5,ELAVL4,ENAH,EPHA7,ETV1,FLRT2,FN1,GAP43,GAS1,GDNF,GJA1,GLI2,GLI3,HECW2,ITGB1,KIF1A,KIF5A,KIF5C,LAMA1,LAMA2,LAMB2,LIFR,LRRC4C,MAP1B,MAPK8IP2,MAPT,MGLL,MYH10,MYO9A,NDN,NEFL,NEXN,NFATC4,NGF,NOG,NOTCH3,NPTX1,NRP1,NRP2,NTN1,NUMBL,OBSL1,OLFM1,PHACT…
GO:BP	cell projection morphogenesis	GO:0048858	4.82037e-16	15.3169	681	1294	106	21354	ADARB1,ADCY1,AMIGO1,APBB1,ARHGAP44,ARTN,ATL1,BOC,BRSK1,BRSK2,CCDC141,CDH11,CDH2,CDKL5,CHL1,CHN1,CHODL,CHRNA3,CNTN5,CNTNAP2,CTNNA2,CXCL12,DACT1,DLG4,DMD,EFNA5,ELAVL4,ENAH,EPHA7,ETV1,FLRT2,FN1,GAP43,GAS1,GDNF,GJA1,GLI2,GLI3,HECW2,ITGB1,KANK1,KIF1A,KIF5A,KIF5C,LAMA1,LAMA2,LAMB2,LIFR,LRRC4C,MAP1B,MAPK8IP2,MAPT,MGLL,MYH10,MYO9A,NDN,NEFL,NES,NEXN,NFATC4,NGF,NOG,NOTCH3,NPTX1,NRP1,NRP2,NTN1,NUMBL,OBSL1,O…
GO:BP	axon development	GO:0061564	5.34778e-16	15.2718	497	1294	87	21354	ADARB1,ADCY1,AMIGO1,APBB1,APOD,ARTN,ATL1,BOC,BRSK1,BRSK2,CCDC141,CDH11,CDH2,CDKL5,CHL1,CHN1,CHODL,CNR1,CNTN5,CRTAC1,CTNNA2,CXCL12,EFNA5,ENAH,EPHA7,ETV1,FKBP1B,FLNA,FLRT2,FN1,GAP43,GAS1,GDNF,GLI2,GLI3,ITGB1,JAM3,KIF5A,KIF5C,LAMA1,LAMA2,LAMB2,LRRC4C,MAP1B,MAPT,MGLL,MMP2,MYH10,NCAM2,NDN,NEFL,NEXN,NGF,NOG,NOTCH3,NPTX1,NRP1,NRP2,NTN1,NUMBL,OLFM1,PHOX2B,PLP1,PLXNA4,PLXNB3,PTN,PTPRM,PTPRS,RGMA,ROBO1,ROB…
GO:BP	divalent inorganic cation homeostasis	GO:0072507	7.11568e-16	15.1478	537	1294	91	21354	ACKR3,ACKR4,ADCY5,ADCYAP1,ADCYAP1R1,AGTR1A,AKAP6,ANK2,APLNR,ATP1A2,ATP2B3,ATP2B4,BDKRB2,BMP4,C3AR1,C5AR1,CACNA1C,CACNA1G,CACNB2,CALB2,CASQ1,CASQ2,CAV1,CAV2,CAV3,CDH5,CNR1,CX3CR1,DLG4,DMD,DMPK,EDNRA,EDNRB,EPOR,ESR1,F2R,FAM155A,FGF2,FKBP1B,FXYD1,FZD2,GALR2,GATA2,GJA1,GPR20,GPR4,GRIA1,JPH2,JPH3,KCNA5,KCNK3,KCTD17,MICU3,NCS1,NGF,NOL3,NOS1,NPY1R,NPY2R,NTSR1,OPRL1,P2RY6,PDGFRA,PKD2,PLN,PRKD1,PRKG1,PTGE…
GO:BP	plasma membrane bounded cell projection morphogenesis	GO:0120039	8.45131e-16	15.0731	676	1294	105	21354	ADARB1,ADCY1,AMIGO1,APBB1,ARHGAP44,ARTN,ATL1,BOC,BRSK1,BRSK2,CCDC141,CDH11,CDH2,CDKL5,CHL1,CHN1,CHODL,CHRNA3,CNTN5,CNTNAP2,CTNNA2,CXCL12,DACT1,DLG4,DMD,EFNA5,ELAVL4,ENAH,EPHA7,ETV1,FLRT2,FN1,GAP43,GAS1,GDNF,GJA1,GLI2,GLI3,HECW2,ITGB1,KANK1,KIF1A,KIF5A,KIF5C,LAMA1,LAMA2,LAMB2,LIFR,LRRC4C,MAP1B,MAPK8IP2,MAPT,MGLL,MYH10,MYO9A,NDN,NEFL,NEXN,NFATC4,NGF,NOG,NOTCH3,NPTX1,NRP1,NRP2,NTN1,NUMBL,OBSL1,OLFM1…
GO:BP	ossification	GO:0001503	1.32728e-15	14.877	394	1294	75	21354	ASPN,BMP4,BMP5,CHRD,CHRDL1,CLEC3B,COL1A1,COL1A2,COL5A2,CTGF,DCHS1,DDR2,DHH,ECM1,FAT4,FERMT2,FGF18,FGF2,FGFR1,FSTL3,FZD1,GABBR1,GDF10,GFRA4,GJA1,GLI2,GLI3,GPC3,GREM1,HAND2,ID4,IGF1,IGFBP3,IGFBP5,IGSF10,KAZALD1,LRP3,LTBP3,MMP16,MMP2,MN1,NELL1,NOG,NPNT,NPR2,OSR1,P3H1,PDLIM7,PENK,PRKD1,PTGS2,PTH1R,PTN,ROR2,RSPO2,SCUBE2,SFRP1,SLC24A3,SLC8A1,SMO,SNAI1,SNAI2,SPARC,STC1,TACR1,TEK,TGFB2,TGFB3,THBS3,TMEM11…
GO:BP	ameboidal-type cell migration	GO:0001667	1.33685e-15	14.8739	439	1294	80	21354	ACTA2,ACVRL1,ADGRA2,AKAP12,AMOTL1,ANGPT1,ANXA1,ATOH8,ATP2B4,BMP4,BMPER,CCBE1,CDH13,CDH2,CDH5,CLEC14A,CXCL12,CYGB,CYP1B1,DCN,DDR2,DMTN,EDNRB,FGF1,FGF18,FGF2,FGF7,FGFR1,FLT4,FN1,FSTL1,GATA2,GDNF,GJA1,GPC3,GREM1,HAND2,HAS2,HSPB1,IGF1,ITGB1,KANK1,KANK2,KDR,LGMN,LOXL2,MEOX2,MMRN2,NOS3,NR2F2,NRP1,NRP2,PHOX2B,PLPP3,PRKD1,PTGS2,PTN,PTPRM,RHOJ,ROBO1,SEMA3A,SEMA3F,SEMA3G,SLC8A1,SLIT2,SMO,SNAI2,SOX10,SOX17,…
GO:BP	potassium ion transport	GO:0006813	1.35342e-15	14.8686	244	1294	57	21354	ABCC9,ADCYAP1,AKAP6,AMIGO1,ANK2,ATP1A2,ATP1B2,CASQ2,CAV1,CAV3,DPP6,FLNA,FXYD1,GAL,GALR2,GJA5,ITGB1,KCNA2,KCNA5,KCNA6,KCNAB1,KCNB1,KCNC2,KCNC4,KCND2,KCND3,KCNE4,KCNF1,KCNG1,KCNH2,KCNIP2,KCNIP4,KCNJ10,KCNJ12,KCNJ5,KCNJ8,KCNK13,KCNK2,KCNK3,KCNMA1,KCNMB1,KCNN3,KCNQ2,KCNQ3,KCNQ4,KCNT2,LRRC55,NOS1,NOS3,OPRK1,PKD2,PLCB4,PRKG1,RGS4,RNF207,SLC24A3,SNAP25
GO:BP	cell part morphogenesis	GO:0032990	1.70707e-15	14.7677	713	1294	108	21354	ADARB1,ADCY1,AMIGO1,APBB1,ARHGAP44,ARTN,ATL1,BOC,BRSK1,BRSK2,CCDC141,CDH11,CDH2,CDKL5,CHL1,CHN1,CHODL,CHRNA3,CNTN5,CNTNAP2,CTNNA2,CXCL12,DACT1,DLG4,DMD,EFNA5,ELAVL4,ENAH,EPHA7,ETV1,FEZ1,FLRT2,FN1,GAP43,GAS1,GDNF,GJA1,GLI2,GLI3,HECW2,ITGB1,KANK1,KIF1A,KIF5A,KIF5C,LAMA1,LAMA2,LAMB2,LIFR,LRRC4C,MAP1B,MAPK8IP2,MAPT,MGLL,MYH10,MYO9A,NDN,NEFL,NES,NEXN,NFATC4,NGF,NOG,NOTCH3,NPTX1,NRP1,NRP2,NTN1,NUMBL,OB…
GO:BP	regulation of ion transmembrane transporter activity	GO:0032412	1.78095e-15	14.7493	269	1294	60	21354	AKAP6,AMIGO1,ANK2,ASIC2,ATP1A2,ATP1B2,BMP4,CACNB1,CACNB2,CACNG4,CASQ1,CASQ2,CAV1,CAV3,DAPK1,DLG4,DMD,DYSF,FGF13,FKBP1B,FXYD1,FXYD6,FXYD7,GAL,GALR2,HECW2,HPCA,HSPA2,HTR3A,HTR3B,ITGB1,JPH2,JPH3,KCNAB1,KCNC2,KCNE4,KCNG1,LRRC55,MAPK8IP2,NLGN2,NTSR1,OPRL1,OSR1,P2RY6,PIRT,PKD2,PLCB1,PLN,PRKG1,REM1,RNF207,RPH3A,RYR2,SCN1B,SHANK3,SHISA6,STAC,TCAF1,TRDN,TRPC6
GO:BP	positive regulation of multicellular organismal process	GO:0051240	1.86698e-15	14.7289	1519	1294	180	21354	ACVRL1,ADCYAP1,ADGRB2,ADGRL1,ADGRL3,ADRA2B,ADRA2C,AFAP1L2,AGTR1A,AKAP12,AKAP6,AMIGO1,ANXA1,APLN,APLNR,ASIC2,AXL,BMP4,BMPER,C1QTNF3,C3AR1,C5AR1,C6,CAV1,CBLN2,CCBE1,CCM2L,CD200,CDH5,CDKL5,CHODL,CLSTN2,CLSTN3,CNR1,COL1A1,CTGF,CX3CR1,CXCL12,CYP1B1,DAB2,DBH,DMTN,ECM1,EDNRA,EDNRB,EFNA5,ENG,F2R,F3,FERMT2,FGF1,FGF18,FGF2,FGFR1,FLRT2,FLT1,FLT4,FN1,GAL,GATA2,GDNF,GFAP,GJA1,GJA5,GJC2,GLI3,GPRC5B,GRB10,GREM1…
GO:BP	regulation of neuron projection development	GO:0010975	2.55646e-15	14.5924	528	1294	89	21354	ADAMTS1,ADCYAP1,AMIGO1,APBB1,ARHGAP44,ATP1B2,BMP4,BMP5,BRSK1,BRSK2,CDH2,CDKL5,CHN1,CHODL,CHRNA3,CNR1,CNTN1,CPEB1,CSPG4,CTNNA2,CXCL12,DMD,EFEMP1,EFNA5,ELAVL4,EPHA7,EPOR,FEZ1,FGFR1,FKBP1B,FLNA,FN1,FZD1,GFAP,GPRC5B,HECW2,HGF,HSPB1,ITGB1,KANK1,KIF1A,LRRC4C,MAP1B,MAPT,MARK1,NCS1,NDRG4,NEFL,NEGR1,NFATC4,NGF,NR2F1,NRP1,NTN1,NUMBL,OBSL1,P3H1,PLXNA4,PLXNB3,PPP1R9A,PRKD1,PTK7,PTN,PTPRS,RGMA,RIT2,ROBO1,ROR1…
GO:BP	sensory organ development	GO:0007423	2.59164e-15	14.5864	606	1294	97	21354	ACVRL1,ADAMTS18,ALDH1A3,ARHGEF15,ATP2B4,BBS7,BMP4,BMP5,BMPER,BNC2,CACNA1C,CC2D2A,CELF4,CFH,CHRDL1,CNGA3,COL5A1,COL5A2,COL8A1,COL8A2,CRYAB,CXCL14,CYP1B1,CYTL1,DCHS1,EFEMP1,FAT4,FBN1,FGF2,FGFR1,FJX1,FOXF2,FOXP2,FREM2,FRZB,FZD2,GABRB3,GAS1,GATA2,GJA1,GLI2,GLI3,GNG8,HAND2,HEY2,HPCA,IGF1,ITGA8,KCNK2,KCNK3,KCNQ4,LAMA1,LAMB2,LAMC3,LHFPL5,LRIG1,MAB21L1,MAB21L2,MEIS1,MFAP2,MYH10,MYOM1,NES,NKX3-2,NOG,NRP1,…
GO:BP	cell morphogenesis involved in neuron differentiation	GO:0048667	2.59164e-15	14.5864	606	1294	97	21354	ADARB1,ADCY1,AMIGO1,APBB1,ARHGAP44,ARTN,ATL1,BBS1,BOC,BRSK1,BRSK2,CCDC141,CDH11,CDH2,CDKL5,CHL1,CHN1,CHODL,CHRNA3,CNTN5,CTNNA2,CXCL12,DACT1,DLG4,EFNA5,ELAVL4,ENAH,EPHA7,ETV1,FLRT2,FN1,GAP43,GAS1,GDNF,GLI2,GLI3,HECW2,ITGB1,KIF1A,KIF5A,KIF5C,LAMA1,LAMA2,LAMB2,LHFPL5,LRRC4C,MAP1B,MAPK8IP2,MAPT,MGLL,MYH10,NDN,NEFL,NEXN,NFATC4,NGF,NOG,NOTCH3,NPTX1,NRP1,NRP2,NTN1,NUMBL,OBSL1,OLFM1,PHACTR1,PHOX2B,PLXNA4…
GO:BP	skeletal system development	GO:0001501	3.54938e-15	14.4498	502	1294	86	21354	ADAMTS7,BBS1,BGN,BMP4,BMP5,CADM1,CHADL,CHRD,COL1A1,COL1A2,COL3A1,COL5A2,CTGF,CYTL1,DCHS1,ECM1,EFEMP1,EVC,FAT4,FBN1,FGF18,FGF2,FGFR1,FGFR2,FRZB,GAS1,GJA1,GJA5,GLI2,GLI3,GREM1,HAND1,HAND2,HAS2,HHIP,HOXA5,HOXA7,HOXB2,HOXC4,HOXC6,HOXC8,HOXC9,HOXD8,IGF1,LOXL2,LTBP3,LUM,MEIS1,MMP16,MMP2,MUSTN1,NKX3-2,NOG,NPR2,OSR1,P3H1,PDGFRA,PDGFRB,PLS3,PTH1R,RAB23,RARG,ROR2,RSPO2,SCUBE2,SERPINH1,SFRP1,SMAD9,SNAI1,SNA…
GO:BP	cell junction assembly	GO:0034329	4.30257e-15	14.3663	429	1294	78	21354	ACVRL1,ADGRB2,ADGRL1,ADGRL3,AMIGO1,ANK2,APOD,ARHGAP6,ARHGEF9,ASIC2,CADM1,CAV1,CBLN2,CDH11,CDH19,CDH2,CDH5,CDH6,CLSTN2,CLSTN3,CNTN5,COL16A1,DCHS1,DLC1,DMTN,EFNA5,EPHA7,FAM107A,FERMT2,FGF13,FLRT2,FN1,FZD1,GABRB3,GAP43,GJA1,GJA5,GJC1,GJD3,GPBAR1,GPC6,GREM1,ITGB1,JAM3,KDR,LGI2,LIMCH1,LRFN1,LRRC4B,LRRN3,LRRTM1,MAP1B,MAPT,MUSK,MYO9A,NLGN2,NPHP1,NRP1,NTN1,OBSL1,PCDH17,PHLDB2,PPP1R9A,PTPRS,RAMP2,SDK1,SDK…
GO:BP	transmembrane receptor protein tyrosine kinase signaling pathway	GO:0007169	5.05766e-15	14.2961	592	1294	95	21354	ADGRA2,AFAP1L2,ANGPT1,ANGPTL1,APLN,APOD,AXL,BMP4,BMP5,CADM4,CAV2,CCBE1,CDH13,CDH3,CHN1,CHRNA3,CLEC14A,COL1A1,COL4A5,CSPG4,CTGF,DCN,DDR2,EFEMP1,EFNA5,EFS,EIF4EBP1,EMILIN1,ENHO,EPHA7,EPN2,ESR1,F3,FAT4,FGF1,FGF18,FGF2,FGF7,FGFR1,FGFR2,FLRT2,FLT1,FLT4,GDNF,GFRA1,GFRA4,GRB10,GRB14,GREM1,HGF,HHIP,HIP1,HSPB1,IGF1,IGF1R,IGFBP2,IGFBP3,IGFBP4,IGFBP5,IRS1,KANK1,KDR,LGMN,MMRN2,MUSK,MYOCD,MYOF,NDN,NDRG4,NFATC…
GO:BP	muscle tissue development	GO:0060537	5.56933e-15	14.2542	440	1294	79	21354	AKAP6,ANGPT1,AW551984,BMP4,BMP5,BVES,CASQ1,CAV1,CAV2,CAV3,CCM2L,CFL2,COL14A1,COL3A1,CSRP1,DCN,DMD,DNER,ENG,EPOR,FGF1,FGF2,FGFR1,FHOD3,FOXP2,GJA1,GJA5,GJC1,GREM1,HAND1,HAND2,HEY2,HLX,IGF1,IGFBP5,ITGA8,ITGB1,JPH2,KCNAB1,KCNK2,MEIS1,MEOX2,MYH10,MYH11,MYLK,MYOCD,MYOM1,NOG,NR2F2,OSR1,PDGFRA,PDGFRB,PGM5,PHOX2B,PI16,PKD2,PLAGL1,PLN,POPDC2,PRKG1,RBFOX1,RBM24,RGS4,RYR2,S100B,SGCB,SGCD,SLC25A4,SMO,SORBS2,S…
GO:BP	negative regulation of cell communication	GO:0010648	6.33993e-15	14.1979	1347	1294	164	21354	ACKR3,ADGRA2,ADGRG3,APC2,APLN,APLNR,APOD,ARHGAP44,ASPN,ATP2B4,BDKRB2,BEND6,BMP4,BMP5,BMPER,C1QTNF3,CADM4,CAV1,CAV2,CAV3,CCDC3,CD109,CDH2,CELF4,CHRD,CHRDL1,CIDEA,CX3CR1,CXCL12,CYP7B1,DAB2,DACT1,DACT3,DCN,DKK2,DKK3,DLC1,DMD,ECM1,EMILIN1,ENG,ENHO,EPN2,ESR1,FAIM2,FBN1,FKBP1B,FRZB,FSTL3,FZD1,GABBR1,GAS1,GATA2,GDNF,GJA1,GLI2,GLI3,GNAI1,GPC3,GPR161,GPR37L1,GPRASP1,GRB10,GRB14,GREM1,GREM2,GRIA1,GRIK3,HEY…
GO:BP	negative regulation of signaling	GO:0023057	7.87188e-15	14.1039	1350	1294	164	21354	ACKR3,ADGRA2,ADGRG3,APC2,APLN,APLNR,APOD,ARHGAP44,ASPN,ATP2B4,BDKRB2,BEND6,BMP4,BMP5,BMPER,C1QTNF3,CADM4,CAV1,CAV2,CAV3,CCDC3,CD109,CDH2,CELF4,CHRD,CHRDL1,CIDEA,CX3CR1,CXCL12,CYP7B1,DAB2,DACT1,DACT3,DCN,DKK2,DKK3,DLC1,DMD,ECM1,EMILIN1,ENG,ENHO,EPN2,ESR1,FAIM2,FBN1,FKBP1B,FRZB,FSTL3,FZD1,GABBR1,GAS1,GATA2,GDNF,GJA1,GLI2,GLI3,GNAI1,GPC3,GPR161,GPR37L1,GPRASP1,GRB10,GRB14,GREM1,GREM2,GRIA1,GRIK3,HEY…
GO:BP	urogenital system development	GO:0001655	8.97662e-15	14.0469	380	1294	72	21354	ACTA2,ADAMTS1,AGTR1A,ANGPT1,ANXA1,APH1C,BMP4,BMPER,C3AR1,CC2D2A,CFH,CYP7B1,DCHS1,DCN,EDNRA,EPHA7,ESR1,FAT4,FBN1,FGF1,FGF2,FGFR1,FOXF1,FREM2,FSTL3,GATA2,GDNF,GLI2,GLI3,GPC3,GPR4,GREM1,HAS2,ID4,IGF1,ITGA8,KANK2,KCNJ8,KIF26B,LAMB2,MAGED1,MMP17,MMP2,MYOCD,NID1,NOG,NOTCH3,NPNT,NRP1,OSR1,PDGFD,PDGFRA,PDGFRB,PKD2,PODXL,PTK7,PYGO1,RARG,SALL1,SFRP1,SLIT2,SMAD9,SMO,SOX17,SPRY1,TCF21,TEK,TGFB2,TNC,WNT2B,WWT…
GO:BP	supramolecular fiber organization	GO:0097435	8.98897e-15	14.0463	729	1294	108	21354	AEBP1,ARHGAP6,ARHGEF15,CALD1,CAP2,CASQ1,CASQ2,CAV1,CAV3,CDC42EP3,CDH5,CFL2,CHADL,CLIP3,CLIP4,COL14A1,COL1A1,COL1A2,COL3A1,COL5A1,COL5A2,CRTAP,CRYAB,CSRP1,CTGF,CTNNA2,CYP1B1,DDR2,DES,DLC1,DMTN,DPT,EFEMP2,EFS,EMILIN1,ENAH,FAM107A,FBLN5,FERMT2,FGF13,FHOD3,FKBP10,FLNA,FMN2,GAS2L2,GFAP,GREM1,HIP1,ITGB1,JMY,KANK1,KANK2,KANK4,KIRREL,KRT17,LIMCH1,LMOD1,LOXL2,LOXL4,LTBP3,LUM,MAP1B,MAPT,MFAP4,MMP11,MYH10,M…
GO:BP	wound healing	GO:0042060	1.40767e-14	13.8515	383	1294	72	21354	ACTA2,ACVRL1,ADAMTS18,ADRA2B,ADRA2C,ANXA1,AXL,CADM4,CAV1,CAV3,CCM2L,CD109,CDH3,CFH,COL1A1,COL3A1,COL5A1,DCBLD2,DCN,DMTN,DYSF,ENG,F13A1,F2R,F3,FERMT2,FGF1,FGF2,FGF7,FGFR2,FKBP10,FLNA,FN1,GATA2,GJA1,GLI3,GPR4,IGF1,ITGA9,ITGB1,KANK1,KDR,MCAM,MMRN1,MUSTN1,MYH10,MYLK,MYOF,NOG,PDGFRA,PDGFRB,PHLDB2,PLAU,PLPP3,POSTN,PRKG1,PROS1,PTK7,SELP,SERPINE2,SERPING1,SNAI2,SPARC,TGFB2,TGFB3,THBD,TNC,TPM1,VEGFB,VWF,W…
GO:BP	positive regulation of transport	GO:0051050	2.18822e-14	13.6599	997	1294	132	21354	ADCYAP1,ADCYAP1R1,AGTR1A,AKAP6,AMIGO1,ANGPT1,ANK2,ANXA1,AOC3,APBB1,APLN,APLNR,ASIC2,ATP1B2,AXL,BMP4,C1QTNF2,C1QTNF3,CACNA1B,CACNA1C,CACNA1G,CACNB2,CACNG4,CADPS,CALY,CASQ1,CAV1,CAV3,CDH2,CDH3,CLIP3,CNR1,CNTN1,CXCL12,DAB2,DMD,DOC2B,DPP6,EDNRA,EDNRB,EHD2,F2R,FABP3,FEZ1,FGFR1,FLNA,FRMD4A,FXYD1,GABBR1,GAL,GALR2,GATA2,GJA1,GJC2,GLI3,GPC3,GPR27,GREM1,HIP1,HPCA,HSPA2,HTR3A,HTR3B,IGF1,IRS1,ITGB1,JPH2,KCNB…
GO:BP	positive regulation of cytosolic calcium ion concentration	GO:0007204	2.25301e-14	13.6472	342	1294	67	21354	ACKR3,ACKR4,ADCY5,ADCYAP1,ADCYAP1R1,AGTR1A,AKAP6,ANK2,APLNR,BDKRB2,BMP4,C3AR1,C5AR1,CACNA1C,CACNA1G,CACNB2,CASQ1,CASQ2,CAV1,CAV3,CNR1,CX3CR1,DLG4,DMD,EDNRA,EDNRB,EPOR,ESR1,F2R,FAM155A,FGF2,FKBP1B,FZD2,GALR2,GATA2,GJA1,GPR20,GPR4,JPH2,JPH3,NGF,NOL3,NPY2R,NTSR1,OPRL1,P2RY6,PDGFRA,PKD2,PLN,PRKD1,PRKG1,PTGER1,PTGFR,PTGIR,PTH1R,RIC3,RYR2,SLC8A1,SLC8A2,SNCA,TACR1,TGFB2,TRDN,TRPC1,TRPC3,TRPC6,XCR1
GO:BP	cellular process	GO:0009987	3.8401e-14	13.4157	17988	1294	1190	21354	9330182L06RIK,A4GALT,AASS,AATK,ABCA8A,ABCA9,ABCC9,ABCG4,ABLIM2,ABLIM3,ACKR1,ACKR3,ACKR4,ACTA2,ACVRL1,ADAM22,ADAMTS1,ADAMTS18,ADAMTS4,ADAMTS7,ADAMTSL1,ADAMTSL3,ADAMTSL4,ADARB1,ADCY1,ADCY5,ADCYAP1,ADCYAP1R1,ADGRA2,ADGRB2,ADGRE1,ADGRF5,ADGRG3,ADGRG6,ADGRL1,ADGRL3,ADGRL4,ADRA2B,ADRA2C,AEBP1,AFAP1L2,AGTR1A,AHRR,AK4,AKAP12,AKAP6,ALDH1A3,ALDH7A1,AMIGO1,AMOTL1,ANGPT1,ANGPTL1,ANK1,ANK2,ANO2,ANTXR1,ANXA1,A…
GO:BP	potassium ion transmembrane transport	GO:0071805	4.01747e-14	13.396	214	1294	51	21354	ABCC9,AKAP6,AMIGO1,ANK2,ATP1A2,ATP1B2,CASQ2,CAV1,CAV3,DPP6,FLNA,GAL,GALR2,ITGB1,KCNA2,KCNA5,KCNA6,KCNAB1,KCNB1,KCNC2,KCNC4,KCND2,KCND3,KCNE4,KCNF1,KCNG1,KCNH2,KCNIP2,KCNIP4,KCNJ10,KCNJ12,KCNJ5,KCNJ8,KCNK13,KCNK2,KCNK3,KCNMA1,KCNMB1,KCNN3,KCNQ2,KCNQ3,KCNQ4,KCNT2,LRRC55,OPRK1,PKD2,PRKG1,RGS4,RNF207,SLC24A3,SNAP25
GO:BP	embryonic morphogenesis	GO:0048598	5.18699e-14	13.2851	643	1294	98	21354	ALDH1A3,APLN,APLNR,ATOH8,BMP4,BMP5,CACNA1C,CC2D2A,CHRD,COL12A1,COL5A1,COL5A2,COL6A1,COL8A1,DACT1,EFEMP1,ENAH,ENG,FBN1,FGFR1,FGFR2,FN1,FOXF1,FOXF2,FREM2,FRZB,FZD1,FZD2,GAS1,GATA2,GDNF,GJA1,GJA5,GLI2,GLI3,GPC3,GREM1,GREM2,HAND1,HAND2,HLX,HOXA5,HOXA7,HOXB2,HOXC4,HOXC9,ITGA7,ITGA8,KCNQ4,LAMB1,LHFPL5,LRIG1,MAB21L2,MFAP2,MMP16,MMP2,MUSTN1,NKX3-2,NOG,NTN1,OSR1,PDGFRA,PHLDB2,PKD2,PLPP3,PRICKLE1,PTK7,RARG…
GO:BP	regulation of molecular function	GO:0065009	5.2777e-14	13.2776	2826	1294	278	21354	ADARB1,ADCY1,ADCYAP1,ADCYAP1R1,ADGRG3,ADRA2B,ADRA2C,AFAP1L2,AGTR1A,AKAP6,AMIGO1,ANGPT1,ANK2,ANTXR1,ANXA1,AOC3,APC2,APH1C,ARHGAP20,ARHGAP23,ARHGAP44,ARHGAP6,ARHGEF15,ASIC2,ATP1A2,ATP1B2,ATP2B4,AXL,BAG2,BEX2,BMP4,C1QTNF2,C1QTNF9,C5AR1,CACNA1C,CACNB1,CACNB2,CACNG4,CALD1,CASP12,CASQ1,CASQ2,CAV1,CAV2,CAV3,CCDC8,CCM2L,CD109,CD200,CDH3,CDKL5,CERS1,CHN1,CHRNA3,CNR1,CNRIP1,COL28A1,COL6A3,CRTAC1,CRYAB,CSPG…
GO:BP	export from cell	GO:0140352	5.31173e-14	13.2748	908	1294	123	21354	ADCY1,ADCY5,ADCYAP1,AGTR1A,ANXA1,APBA1,APBB1,APLN,ATP1A2,ATP1B2,ATP2B3,AXL,BACE1,BRSK1,BRSK2,C1QTNF3,CACNA1B,CACNA1C,CACNA1G,CACNB2,CADPS,CD200,CHRM2,CHRNA3,CHRNA5,CNR1,CPLX1,CTGF,CXCL12,DMTN,DOC2B,EFNA5,ENG,ENHO,EXOC3L2,F2R,FGF7,FGFR1,FKBP1B,FOXF1,FRMD4A,FXYD1,GABBR1,GAL,GATA2,GCGR,GJA1,GJA5,GPR27,IGF1,IGFBP3,ILDR2,IRS1,KCNA2,KCNA5,KCNB1,KCNC4,KCND3,KCNE4,KCNH2,KCNIP2,KCNT2,LEPR,LIN7B,LTBP4,MYH1…
GO:BP	positive regulation of ion transmembrane transport	GO:0034767	6.86744e-14	13.1632	248	1294	55	21354	AGTR1A,AKAP6,AMIGO1,ANK2,AOC3,APLNR,ASIC2,ATP1B2,BMP4,C1QTNF2,CACNA1C,CACNB2,CACNG4,CASQ1,CLIP3,DMD,DPP6,EDNRA,F2R,FLNA,FXYD1,GAL,GALR2,GJC2,GPC3,HSPA2,HTR3A,HTR3B,IGF1,IRS1,ITGB1,JPH2,KCNC2,KCNH2,KCNIP2,KCNMB1,LRRC55,NOS1,NTSR1,OPRK1,P2RY6,PIRT,PKD2,PLCB1,PLP1,PRKG1,RNF207,RYR2,SHANK3,SNCA,STAC,TCAF1,TRDN,TRPC1,TRPC6
GO:BP	positive regulation of transmembrane transport	GO:0034764	6.86744e-14	13.1632	248	1294	55	21354	AGTR1A,AKAP6,AMIGO1,ANK2,AOC3,APLNR,ASIC2,ATP1B2,BMP4,C1QTNF2,CACNA1C,CACNB2,CACNG4,CASQ1,CLIP3,DMD,DPP6,EDNRA,F2R,FLNA,FXYD1,GAL,GALR2,GJC2,GPC3,HSPA2,HTR3A,HTR3B,IGF1,IRS1,ITGB1,JPH2,KCNC2,KCNH2,KCNIP2,KCNMB1,LRRC55,NOS1,NTSR1,OPRK1,P2RY6,PIRT,PKD2,PLCB1,PLP1,PRKG1,RNF207,RYR2,SHANK3,SNCA,STAC,TCAF1,TRDN,TRPC1,TRPC6
GO:BP	regulation of calcium ion transport	GO:0051924	1.09668e-13	12.9599	275	1294	58	21354	ADCYAP1R1,AGTR1A,AKAP6,ANK2,APLNR,ATP1A2,BMP4,CACNA1B,CACNA1C,CACNA1G,CACNB1,CACNB2,CASQ1,CASQ2,CAV1,CAV3,CXCL12,DMD,DYSF,EDNRA,F2R,FKBP1B,GJA1,GJC2,GNAO1,HPCA,HSPA2,IGF1,JPH2,JPH3,JPH4,MYLK,NGF,NOL3,NOS1,NOS3,NTSR1,OPRL1,P2RY6,PDGFRB,PKD2,PLN,PLP1,PRKD1,PTGS2,REM1,RGS4,RYR2,SLC8A1,SNCA,STAC,STC1,TGFB2,TRDN,TRPC1,TRPC3,TRPC4,TRPC6
GO:BP	actin-mediated cell contraction	GO:0070252	1.23295e-13	12.9091	101	1294	34	21354	ACTA2,AKAP6,ANK2,ATP1A2,CACNA1C,CACNA1G,CACNB2,CASQ2,CAV1,CAV3,CTNNA3,FGF13,FLNA,FRMD6,FXYD1,GJA5,KCNA5,KCND3,KCNE4,KCNH2,KCNJ5,KCNJ8,LIMCH1,NOS1,PARVA,PLN,RNF207,RYR2,SCN1B,SCN5A,SGCD,STC1,TNNT2,TPM1
GO:BP	intracellular signal transduction	GO:0035556	1.30687e-13	12.8838	2486	1294	251	21354	ACKR3,ACKR4,ACTA2,ADCY1,ADCY5,ADCYAP1,ADCYAP1R1,ADGRB2,ADGRE1,ADGRG3,ADGRG6,ADGRL1,ADGRL3,ADGRL4,ADRA2B,ADRA2C,AGTR1A,AKAP12,AKAP6,AMOTL1,ANGPT1,ANK2,APLNR,ARHGAP44,ARHGEF25,ARHGEF9,ATP2B4,AXL,BDKRB2,BMP4,BMPER,BRSK1,BRSK2,C1QTNF2,C1QTNF3,C5AR1,CACNA1C,CADM4,CALCRL,CASP12,CASQ1,CASQ2,CAV1,CAV2,CAV3,CDC42EP3,CDH13,CDH2,CHN1,CNKSR2,CNR1,COL1A2,COL3A1,CRYAB,CSPG4,CTGF,CX3CR1,CXCL12,CYP1B1,DACT1,DAPK…
GO:BP	calcium ion transport	GO:0006816	2.5131e-13	12.5998	431	1294	75	21354	ADCYAP1R1,AGTR1A,AKAP6,ANK2,APLNR,ATP1A2,ATP2B3,ATP2B4,BMP4,CACNA1B,CACNA1C,CACNA1G,CACNA1H,CACNA2D3,CACNB1,CACNB2,CACNG4,CALCRL,CASQ1,CASQ2,CAV1,CAV3,CTGF,CXCL12,DMD,DYSF,EDNRA,F2R,FAM155A,FGF2,FKBP1B,GJA1,GJC2,GNAO1,HPCA,HSPA2,IGF1,JPH2,JPH3,JPH4,MICU3,MYLK,NCS1,NGF,NMUR1,NOL3,NOS1,NOS3,NTSR1,OPRL1,P2RY6,PDGFRB,PKD2,PLN,PLP1,PRKD1,PTGS2,RAMP2,REM1,RGS4,RYR2,SLC24A3,SLC25A23,SLC8A1,SLC8A2,SNCA,S…
GO:BP	growth	GO:0040007	2.81167e-13	12.551	1017	1294	131	21354	ACVRL1,ADARB1,AKAP6,ANXA1,APBA1,APBB1,APOD,BMP4,BNC2,CACNA1C,CADM1,CAV3,CCM2L,CDKL5,CLSTN3,COL14A1,CRYAB,CXCL12,DACT3,DCBLD2,DDR2,DMD,DYSF,ECM1,EFNA5,EPHA7,ESR1,EVC,FAM107A,FBLN5,FGF1,FGF2,FGF7,FGFR1,FGFR2,FLT4,FN1,FRZB,GAP43,GAS1,GJA1,GLI2,GLI3,GPC3,GPR149,GREM1,HEY2,HLX,HOXA5,IGF1,IGFBP2,IGFBP3,IGFBP4,IGFBP5,IGFBP7,IGSF10,ITGB1,KAZALD1,KCNK2,KIF26B,KRT17,LAMB2,LEPR,LGMN,MAP1B,MAPT,MEIS1,MGLL,MU…
GO:BP	cell-cell adhesion	GO:0098609	3.44111e-13	12.4633	831	1294	114	21354	ADAMTS18,ADGRL1,ADGRL3,AMIGO1,ANXA1,ASTN1,ASTN2,ATP1B2,BMP4,BMP5,BVES,CADM1,CADM3,CAV1,CCDC141,CCM2L,CD200,CD93,CDH11,CDH13,CDH19,CDH2,CDH3,CDH5,CDH6,CFH,CLSTN2,CLSTN3,CNTN5,COLEC10,CTNNA2,CTNNA3,CX3CR1,CXCL12,CYP1B1,DCHS1,DLG2,DLG4,DMTN,DSC3,EFNA5,EPHA7,FAT4,FN1,FOXF1,FSTL3,GLI3,GPC6,HAS2,HLX,HSPB1,IGF1,IGFBP2,ITGA7,ITGB1,JAM2,JAM3,KIF26B,KIRREL,LAMB1,LIMS2,LRRC32,LRRC4B,LRRC4C,MCAM,NEGR1,NEXN,N…
GO:BP	second-messenger-mediated signaling	GO:0019932	4.47217e-13	12.3495	426	1294	74	21354	ACKR3,ACKR4,ADCY1,ADCY5,ADCYAP1,ADCYAP1R1,ADGRB2,ADGRE1,ADGRG3,ADGRG6,ADGRL1,ADGRL3,ADGRL4,ADRA2C,AGTR1A,AKAP6,ANK2,APLNR,ATP2B4,CACNA1C,CALCRL,CASQ1,CASQ2,CDH13,CNR1,CX3CR1,DMD,DMPK,DMTN,EDNRB,FKBP1B,FN1,GAL,GALR2,GCGR,GNAI1,GPR161,GPR4,HPCA,IGF1,KCNC2,KDR,MAPT,MRAP2,MRVI1,NFATC4,NMUR1,NOS1,NOS3,NPR1,NPR2,NPY2R,OPRL1,PDE7B,PLN,PPP1R9A,PRKAR1B,PRKAR2B,PRKG1,PTGER1,PTGFR,PTGIR,PTH1R,RAMP2,RCAN2,RI…
GO:BP	positive regulation of cation transmembrane transport	GO:1904064	5.0607e-13	12.2958	173	1294	44	21354	AGTR1A,AKAP6,AMIGO1,ANK2,APLNR,ASIC2,ATP1B2,BMP4,CACNA1C,CACNB2,CACNG4,CASQ1,DMD,DPP6,EDNRA,F2R,FLNA,FXYD1,GAL,GALR2,GJC2,HSPA2,JPH2,KCNC2,KCNH2,KCNIP2,KCNMB1,LRRC55,NOS1,NTSR1,OPRK1,P2RY6,PIRT,PKD2,PLCB1,PLP1,PRKG1,RNF207,RYR2,SHANK3,SNCA,STAC,TRDN,TRPC1
GO:BP	cellular metal ion homeostasis	GO:0006875	6.0695e-13	12.2168	605	1294	92	21354	ACKR3,ACKR4,ADCY5,ADCYAP1,ADCYAP1R1,AGTR1A,AKAP6,ANK2,APLNR,ATP1A2,ATP1B2,ATP2B3,ATP2B4,BDKRB2,BMP4,C3AR1,C5AR1,C7,CACNA1C,CACNA1G,CACNB2,CALB2,CASQ1,CASQ2,CAV1,CAV2,CAV3,CDH5,CNR1,CX3CR1,DLG4,DMD,DMPK,EDNRA,EDNRB,EPOR,ESR1,F2R,FAM155A,FGF2,FKBP1B,FXYD1,FZD2,GALR2,GATA2,GJA1,GPR20,GPR4,GRIA1,JPH2,JPH3,KCNA5,KCNK3,KCTD17,MICU3,NCS1,NGF,NOL3,NOS1,NPY1R,NPY2R,NTSR1,OPRL1,P2RY6,PDGFRA,PKD2,PLN,PRKD1,…
GO:BP	regulation of cell differentiation	GO:0045595	7.12616e-13	12.1471	1660	1294	184	21354	ACVRL1,ADAMTS7,ADCYAP1,ADGRA2,ADRA2B,ADRA2C,AKAP6,AMIGO1,ANXA1,APBB1,APOLD1,ATOH8,AXL,BCL6B,BEND6,BMP4,BOC,CAV1,CAV3,CCDC3,CD109,CDH5,CDKL5,CHADL,CHODL,CHRD,CMTM5,COL1A1,COL5A1,COL5A2,CTGF,CX3CR1,CXCL12,CXCL14,DAAM2,DAB2,DACT1,DACT3,DDR2,DMD,DMPK,DMTN,EDNRB,EFEMP1,EFNA5,ENG,EPHA7,FAT4,FBN1,FERMT2,FEZ1,FGF18,FGF2,FGFR1,FLNA,FN1,FRZB,FSTL3,GATA2,GDF10,GDNF,GFAP,GJA1,GJC2,GLI2,GLI3,GPR37L1,GPRC5B,GR…
GO:BP	signal transduction	GO:0007165	8.17261e-13	12.0876	6740	1294	543	21354	9330182L06RIK,ACKR1,ACKR3,ACKR4,ACTA2,ACVRL1,ADAM22,ADCY1,ADCY5,ADCYAP1,ADCYAP1R1,ADGRA2,ADGRB2,ADGRE1,ADGRF5,ADGRG3,ADGRG6,ADGRL1,ADGRL3,ADGRL4,ADRA2B,ADRA2C,AFAP1L2,AGTR1A,AKAP12,AKAP6,ALDH1A3,AMOTL1,ANGPT1,ANGPTL1,ANK1,ANK2,ANXA1,APC2,APH1C,APLN,APLNR,APOD,ARHGAP20,ARHGAP23,ARHGAP44,ARHGAP6,ARHGEF25,ARHGEF9,ARTN,ASIC2,ASPN,ATOH8,ATP2B4,AXL,BBS7,BDKRB2,BEND6,BEX2,BMP4,BMP5,BMPER,BOC,BRSK1,BRSK2…
GO:BP	regulation of cation channel activity	GO:2001257	9.14768e-13	12.0387	183	1294	45	21354	AKAP6,AMIGO1,ANK2,ASIC2,BMP4,CACNB1,CACNB2,CACNG4,CASQ1,CASQ2,CAV1,DAPK1,DLG4,DMD,DYSF,FGF13,FKBP1B,GAL,GALR2,HPCA,ITGB1,JPH2,JPH3,KCNAB1,KCNC2,KCNE4,KCNG1,LRRC55,MAPK8IP2,NLGN2,NTSR1,OPRL1,P2RY6,PIRT,PKD2,PLN,PRKG1,REM1,RNF207,RPH3A,SCN1B,SHANK3,SHISA6,STAC,TRDN
GO:BP	cartilage development	GO:0051216	1.09376e-12	11.9611	199	1294	47	21354	ADAMTS7,BBS1,BGN,BMP4,BMP5,CHADL,COL1A1,CTGF,CYTL1,ECM1,EFEMP1,EVC,FGF18,FGF2,FGFR1,FRZB,GLI2,GLI3,GREM1,HAND1,HAND2,HOXA5,HOXC4,LOXL2,LTBP3,LUM,MUSTN1,NKX3-2,NOG,OSR1,PTH1R,RARG,ROR2,RSPO2,SCUBE2,SERPINH1,SMAD9,SNAI1,SNAI2,STC1,TGFB2,THBS3,WISP1,WNT2B,WNT9A,ZBTB16,ZEB1
GO:BP	negative regulation of developmental process	GO:0051093	1.11731e-12	11.9518	1046	1294	132	21354	9330182L06RIK,ACVRL1,ADAMTS1,ADAMTS7,ADCYAP1,ADGRB2,ANXA1,APBB1,ARHGEF15,ASPN,ATP2B4,BMP4,CAV1,CAV3,CDH3,CHADL,CHRD,CMTM5,COL5A1,COL5A2,CX3CR1,CXCL14,DAAM2,DACT3,DCN,DMD,DMTN,ECM1,EDNRB,EFEMP1,EFNA5,EMILIN1,EPHA7,EPN2,FBLN5,FBN1,FERMT2,FGFR1,FRZB,FSTL3,GATA2,GDF10,GJA1,GLI2,GLI3,GPR37L1,GPR4,GRB14,GREM1,HAND2,HEY2,HHIP,HLX,HOXA5,HOXA7,HSPB1,ID4,IGF1,IGFBP5,IL17D,ITGB1,KANK1,KCNK2,LGMN,LOXL2,LRP3,…
GO:BP	regulation of cell junction assembly	GO:1901888	1.15562e-12	11.9372	207	1294	48	21354	ACVRL1,ADGRB2,ADGRL1,ADGRL3,AMIGO1,APOD,ARHGAP6,ASIC2,CAV1,CBLN2,CLSTN2,CLSTN3,COL16A1,DLC1,DMTN,EFNA5,EPHA7,FAM107A,FERMT2,FLRT2,FZD1,GJA1,GPBAR1,GPC6,GREM1,KDR,LIMCH1,LRFN1,LRRC4B,LRRN3,LRRTM1,MUSK,NLGN2,NPHP1,NRP1,NTN1,PHLDB2,PPP1R9A,PTPRS,SLITRK3,SLITRK5,SNAI1,SNAI2,SNCA,SRPX2,SYNDIG1,TEK,THBS2
GO:BP	developmental growth	GO:0048589	1.58012e-12	11.8013	740	1294	104	21354	ADARB1,AKAP6,ANXA1,APBA1,APOD,BMP4,BNC2,CACNA1C,CADM1,CAV3,CCM2L,CDKL5,COL14A1,CXCL12,DDR2,DMD,DYSF,ECM1,EFNA5,EPHA7,ESR1,EVC,FBLN5,FGF1,FGF2,FGF7,FGFR1,FGFR2,FN1,GAP43,GAS1,GJA1,GLI2,GLI3,GPR149,HEY2,HLX,HOXA5,IGF1,IGSF10,ITGB1,KCNK2,KIF26B,LAMB2,LEPR,LGMN,MAP1B,MAPT,MEIS1,MGLL,MUSK,MUSTN1,MYOCD,NDN,NGF,NKD1,NOG,NPY1R,NRP1,NRP2,NTN1,OLFM1,PDGFRA,PDGFRB,PI16,PLAU,PLCB1,PLXNA4,POSTN,PRKG1,PTK7,PTN…
GO:BP	striated muscle tissue development	GO:0014706	1.83469e-12	11.7364	418	1294	72	21354	AKAP6,ANGPT1,AW551984,BMP4,BMP5,BVES,CASQ1,CAV1,CAV2,CAV3,CCM2L,CFL2,COL14A1,DCN,DMD,DNER,ENG,EPOR,FGF1,FGF2,FGFR1,FHOD3,FOXP2,GJA1,GJA5,GJC1,GREM1,HAND1,HAND2,HEY2,HLX,IGF1,ITGB1,JPH2,KCNAB1,KCNK2,MEIS1,MEOX2,MYH10,MYH11,MYOCD,MYOM1,NOG,NR2F2,PDGFRA,PDGFRB,PGM5,PHOX2B,PI16,PLAGL1,PLN,POPDC2,PRKG1,RBFOX1,RBM24,RGS4,RYR2,S100B,SGCB,SGCD,SLC25A4,SMO,SORBS2,SPEG,TBX2,TCF21,TGFB2,TNNT2,TPM1,TWIST1,WI…
GO:BP	monovalent inorganic cation transport	GO:0015672	2.16999e-12	11.6635	546	1294	85	21354	ABCC9,ADCYAP1,AKAP6,AMIGO1,ANK1,ANK2,ASIC2,ASIC4,ATP1A2,ATP1B2,ATP2B4,CACNA1G,CASQ2,CAV1,CAV3,CNTN1,DMD,DMPK,DPP6,FGF13,FLNA,FXYD1,FXYD6,FXYD7,GAL,GALR2,GJA5,HECW2,ITGB1,KCNA2,KCNA5,KCNA6,KCNAB1,KCNB1,KCNC2,KCNC4,KCND2,KCND3,KCNE4,KCNF1,KCNG1,KCNH2,KCNIP2,KCNIP4,KCNJ10,KCNJ12,KCNJ5,KCNJ8,KCNK13,KCNK2,KCNK3,KCNMA1,KCNMB1,KCNN3,KCNQ2,KCNQ3,KCNQ4,KCNT2,LRRC55,NOS1,NOS3,OPRK1,OSR1,PKD2,PLCB1,PLCB4,PR…
GO:BP	epithelial cell proliferation	GO:0050673	2.23763e-12	11.6502	429	1294	73	21354	ACVRL1,AGTR1A,APLN,APLNR,ATOH8,BMP4,BMP5,BMPER,C5AR1,CAV1,CAV2,CD109,CDH13,CDH3,COL8A1,COL8A2,CXCL12,CYP7B1,DYSF,ECM1,EDNRA,EDNRB,ENG,ESR1,F3,FGF1,FGF18,FGF2,FGF7,FGFR1,FGFR2,FLT1,FLT4,FOXP2,GAS1,GATA2,GJA1,GPBAR1,GPC3,HAS2,HGF,HOXA5,IGF1,IGFBP3,IGFBP4,IGFBP5,KDR,LIMS2,LOXL2,MAGED1,NOG,NR2F2,OSR1,PLAU,PLXNB3,PRKD1,PTN,PTPRM,PTPRN,ROBO1,SCG2,SCN5A,SFRP1,SMO,SNAI2,SPARC,TACR1,TEK,TGFB2,TWIST1,VASH1…
GO:BP	renal system development	GO:0072001	2.32122e-12	11.6343	337	1294	63	21354	ACTA2,ADAMTS1,AGTR1A,ANGPT1,APH1C,BMP4,BMPER,C3AR1,CC2D2A,CFH,DCHS1,DCN,EDNRA,EPHA7,FAT4,FBN1,FGF1,FGF2,FGFR1,FOXF1,FREM2,FSTL3,GDNF,GLI2,GLI3,GPC3,GPR4,GREM1,HAS2,ITGA8,KANK2,KCNJ8,KIF26B,LAMB2,MAGED1,MMP17,MYOCD,NID1,NOG,NOTCH3,NPNT,NRP1,OSR1,PDGFD,PDGFRA,PDGFRB,PKD2,PODXL,PTK7,PYGO1,SALL1,SFRP1,SLIT2,SMAD9,SMO,SOX17,SPRY1,TCF21,TEK,TGFB2,WNT2B,WWTR1,ZBTB16
GO:BP	morphogenesis of a branching epithelium	GO:0061138	2.49802e-12	11.6024	203	1294	47	21354	AGTR1A,ANGPT1,BMP4,CAV3,CXCL12,DCHS1,EDNRA,ENG,ESR1,FAT4,FGF1,FGF2,FGF7,FGFR1,FOXF1,GDNF,GLI2,GLI3,GPC3,GREM1,HGF,HHIP,HOXA5,IGF1,KDR,LAMA1,MAGED1,NFATC4,NOG,NPNT,NRP1,PDGFRA,PKD2,RASIP1,RSPO2,RSPO3,SEMA3A,SFRP1,SLIT2,SMO,SNAI2,SOX10,SPRY1,TCF21,TEK,TNC,WNT2B
GO:BP	cell surface receptor signaling pathway involved in cell-cell signaling	GO:1905114	3.03303e-12	11.5181	529	1294	83	21354	ADGRA2,AMOTL1,APC2,BMP4,CAV1,CDH2,CDH3,CELF4,CHRNA3,CHRNA5,COL1A1,DAAM2,DAB2,DACT1,DACT3,DKK2,DKK3,DLG4,DMPK,EDA,FERMT2,FGF2,FOXL1,FRZB,FZD1,FZD2,GABRB3,GLI2,GLI3,GLRB,GPC3,GPRC5B,GRB10,GREM1,KANK1,MAPK8IP2,MARK1,MPP2,NFATC4,NKD1,NKD2,NLGN2,NOG,NPY2R,NTSR1,NXN,P2RX6,PKD2,PLEKHA4,PLPP3,PPP1R9A,PRICKLE1,PTK7,PTPRU,PYGO1,RBMS3,RECK,RGS4,ROR1,ROR2,RSPO2,RSPO3,SALL1,SEZ6,SFRP1,SHANK3,SHISA6,SLC29A1,SL…
GO:BP	collagen fibril organization	GO:0030199	3.27937e-12	11.4842	54	1294	24	21354	AEBP1,CHADL,COL14A1,COL1A1,COL1A2,COL3A1,COL5A1,COL5A2,CRTAP,CYP1B1,DDR2,DPT,EMILIN1,FKBP10,GREM1,LOXL2,LOXL4,LUM,MMP11,P3H1,PXDN,SERPINH1,TGFB2,TNXB
GO:BP	metal ion homeostasis	GO:0055065	3.6137e-12	11.442	685	1294	98	21354	ACKR3,ACKR4,ADCY5,ADCYAP1,ADCYAP1R1,AGTR1A,AKAP6,ANK1,ANK2,APLNR,ATP1A2,ATP1B2,ATP2B3,ATP2B4,BDKRB2,BMP4,C3AR1,C5AR1,C7,CACNA1C,CACNA1G,CACNB2,CALB2,CASQ1,CASQ2,CAV1,CAV2,CAV3,CDH5,CNR1,CX3CR1,DLG4,DMD,DMPK,EDNRA,EDNRB,EPOR,ESR1,F2R,FAM155A,FGF2,FKBP1B,FXYD1,FZD2,GALR2,GATA2,GJA1,GPR20,GPR4,GRIA1,JPH2,JPH3,KCNA5,KCNH2,KCNJ10,KCNK3,KCTD17,MICU3,NCS1,NGF,NOL3,NOS1,NPY1R,NPY2R,NTSR1,OPRL1,P2RY6,PDGF…
GO:BP	regulation of muscle system process	GO:0090257	4.52658e-12	11.3442	263	1294	54	21354	ADRA2B,ADRA2C,AKAP6,ANK2,ATP1A2,ATP2B4,CACNA1C,CALCRL,CALD1,CASQ1,CASQ2,CAV1,CAV3,CHRM2,CHRNA3,CTGF,CTNNA3,DMD,DMPK,DOCK4,F2R,FGF13,FKBP1B,FXYD1,GJA5,HAND2,HSPB6,IGF1,IGFBP5,MRVI1,MYOCD,NOL3,NOS3,NPNT,NPY2R,PI16,PLN,PRKG1,PTGS2,RGS4,RYR2,SCN5A,SGCA,SLC25A4,SLC8A1,SMTN,STC1,TACR1,TACR2,TACR3,TIFAB,TNNT2,TRPC3,WISP1
GO:BP	cell-substrate adhesion	GO:0031589	5.50252e-12	11.2594	352	1294	64	21354	ACVRL1,ANGPT1,ANTXR1,APOD,ARHGAP6,ATP1B2,AXL,BVES,CDH13,COL16A1,COL1A1,COL3A1,COL5A3,COL8A1,CTGF,DLC1,DMD,DMTN,ECM2,EDA,EDIL3,EFNA5,EGFLAM,EMILIN1,FAM107A,FBLN2,FERMT2,FLNA,FN1,FOXF1,GREM1,HAS2,HOXA7,ITGA11,ITGA8,ITGB1,JAM3,KANK1,KDR,LAMB1,LAMB2,LAMC3,LIMCH1,LIMS2,NID1,NPNT,NPY2R,NRP1,PARVA,PARVB,PHLDB2,PLAU,POSTN,PTN,SFRP1,SORBS3,SPOCK1,SPOCK2,SPRY4,TEK,TMEM8B,TNXB,VTN,VWF
GO:BP	connective tissue development	GO:0061448	5.84816e-12	11.233	273	1294	55	21354	ACTA2,ADAMTS7,BBS1,BGN,BMP4,BMP5,C3AR1,CHADL,COL1A1,COL5A1,CTGF,CYTL1,ECM1,EFEMP1,EVC,FGF18,FGF2,FGFR1,FRZB,GLI2,GLI3,GPR4,GREM1,HAND1,HAND2,HOXA5,HOXC4,ID4,IGF1,LOXL2,LTBP3,LUM,MUSTN1,NKX3-2,NOG,OSR1,PDGFD,PDGFRB,PTH1R,RARG,ROR2,RSPO2,SCUBE2,SERPINH1,SMAD9,SNAI1,SNAI2,STC1,TGFB2,THBS3,WISP1,WNT2B,WNT9A,ZBTB16,ZEB1
GO:BP	regulation of muscle contraction	GO:0006937	6.50048e-12	11.1871	162	1294	41	21354	ADRA2B,ADRA2C,AKAP6,ANK2,ATP1A2,CACNA1C,CALCRL,CALD1,CASQ1,CASQ2,CAV1,CAV3,CHRM2,CHRNA3,CTGF,CTNNA3,DMD,DMPK,DOCK4,F2R,FGF13,FKBP1B,FXYD1,GJA5,HSPB6,MRVI1,MYOCD,NPNT,NPY2R,PLN,PRKG1,PTGS2,RYR2,SCN5A,SLC8A1,SMTN,STC1,TACR1,TACR2,TACR3,TNNT2
GO:BP	kidney development	GO:0001822	7.43033e-12	11.129	327	1294	61	21354	ACTA2,ADAMTS1,AGTR1A,ANGPT1,APH1C,BMP4,BMPER,C3AR1,CC2D2A,CFH,DCHS1,DCN,EDNRA,EPHA7,FAT4,FBN1,FGF1,FGF2,FGFR1,FREM2,FSTL3,GDNF,GLI2,GLI3,GPC3,GPR4,GREM1,HAS2,ITGA8,KANK2,KCNJ8,KIF26B,LAMB2,MAGED1,MMP17,NID1,NOG,NOTCH3,NPNT,NRP1,OSR1,PDGFD,PDGFRA,PDGFRB,PKD2,PODXL,PTK7,PYGO1,SALL1,SFRP1,SLIT2,SMAD9,SMO,SOX17,SPRY1,TCF21,TEK,TGFB2,WNT2B,WWTR1,ZBTB16
GO:BP	regulation of epithelial cell proliferation	GO:0050678	8.18194e-12	11.0871	364	1294	65	21354	ACVRL1,AGTR1A,APLN,APLNR,ATOH8,BMP4,BMP5,C5AR1,CAV1,CAV2,CD109,CDH13,CDH3,CXCL12,CYP7B1,DYSF,ECM1,EDNRA,EDNRB,ENG,ESR1,F3,FGF1,FGF18,FGF2,FGF7,FGFR1,FGFR2,FLT1,FLT4,FOXP2,GAS1,GATA2,GJA1,GPBAR1,GPC3,HAS2,HOXA5,IGF1,KDR,LIMS2,MAGED1,NOG,NR2F2,OSR1,PLAU,PLXNB3,PRKD1,PTN,PTPRM,PTPRN,ROBO1,SCG2,SCN5A,SFRP1,SMO,SNAI2,SPARC,TACR1,TEK,TGFB2,TWIST1,VASH1,VEGFB,WFDC1
GO:BP	positive regulation of ion transport	GO:0043270	8.97173e-12	11.0471	716	1294	100	21354	ADCYAP1,ADCYAP1R1,AGTR1A,AKAP6,AMIGO1,ANK2,AOC3,APBB1,APLN,APLNR,ASIC2,ATP1B2,BMP4,C1QTNF2,C1QTNF3,CACNA1C,CACNB2,CACNG4,CASQ1,CAV1,CLIP3,CNTN1,CXCL12,DMD,DOC2B,DPP6,EDNRA,F2R,FABP3,FLNA,FRMD4A,FXYD1,GABBR1,GAL,GALR2,GJA1,GJC2,GLI3,GPC3,GPR27,HPCA,HSPA2,HTR3A,HTR3B,IGF1,IRS1,ITGB1,JPH2,KCNB1,KCNC2,KCNH2,KCNIP2,KCNMB1,LEPR,LRRC55,MYH10,MYLK,MYOM1,NLGN2,NOS1,NPY2R,NTSR1,OPRK1,P2RY6,PDGFRB,PFKM,PIRT…
GO:BP	axonogenesis	GO:0007409	9.19464e-12	11.0365	450	1294	74	21354	ADARB1,ADCY1,AMIGO1,APBB1,ARTN,ATL1,BOC,BRSK1,BRSK2,CCDC141,CDH11,CDH2,CDKL5,CHL1,CHN1,CHODL,CNTN5,CTNNA2,CXCL12,EFNA5,ENAH,EPHA7,ETV1,FLRT2,FN1,GAP43,GAS1,GDNF,GLI2,GLI3,ITGB1,KIF5A,KIF5C,LAMA1,LAMA2,LAMB2,LRRC4C,MAP1B,MAPT,MGLL,MYH10,NDN,NEFL,NEXN,NGF,NOG,NOTCH3,NPTX1,NRP1,NRP2,NTN1,NUMBL,OLFM1,PHOX2B,PLXNA4,PLXNB3,PTPRM,PTPRS,RGMA,ROBO1,ROBO2,SCN1B,SEMA3A,SEMA3F,SEMA3G,SLIT2,SLIT3,SLITRK3,SLIT…
GO:BP	ion transport	GO:0006811	9.42935e-12	11.0255	3410	1294	312	21354	ABCA8A,ABCA9,ABCC9,ADCY5,ADCYAP1,ADCYAP1R1,AGTR1A,AKAP12,AKAP6,AMIGO1,ANGPT1,ANK1,ANK2,ANO2,ANXA1,AOC3,AP3B2,APBA1,APBB1,APLN,APLNR,APOD,APOL10B,APOL7C,APOLD1,ARHGAP44,ASIC2,ASIC4,ASTN2,ATP10A,ATP1A2,ATP1B2,ATP2B3,ATP2B4,BBS1,BBS7,BDKRB2,BMP4,BRSK2,C1QTNF2,C1QTNF3,CACNA1B,CACNA1C,CACNA1G,CACNA1H,CACNA2D3,CACNB1,CACNB2,CACNG4,CADPS,CALCRL,CALY,CAR14,CASQ1,CASQ2,CAV1,CAV3,CD200,CHRNA3,CHRNA5,CLIP3,…
GO:BP	divalent metal ion transport	GO:0070838	9.98456e-12	11.0007	480	1294	77	21354	ADCYAP1R1,AGTR1A,AKAP6,ANK2,APLNR,ATP1A2,ATP2B3,ATP2B4,BMP4,CACNA1B,CACNA1C,CACNA1G,CACNA1H,CACNA2D3,CACNB1,CACNB2,CACNG4,CALCRL,CASQ1,CASQ2,CAV1,CAV3,CTGF,CXCL12,DMD,DYSF,EDNRA,F2R,FAM155A,FGF2,FKBP1B,GJA1,GJC2,GNAO1,HPCA,HSPA2,IGF1,JPH2,JPH3,JPH4,MICU3,MYLK,NCS1,NGF,NIPA1,NIPAL4,NMUR1,NOL3,NOS1,NOS3,NTSR1,OPRL1,P2RY6,PDGFRB,PKD2,PLN,PLP1,PRKD1,PTGS2,RAMP2,REM1,RGS4,RYR2,SLC24A3,SLC25A23,SLC8A1,…
GO:BP	morphogenesis of a branching structure	GO:0001763	1.45707e-11	10.8365	220	1294	48	21354	AGTR1A,ANGPT1,BMP4,CAV3,CXCL12,DCHS1,EDNRA,ENG,EPHA7,ESR1,FAT4,FGF1,FGF2,FGF7,FGFR1,FOXF1,GDNF,GLI2,GLI3,GPC3,GREM1,HGF,HHIP,HOXA5,IGF1,KDR,LAMA1,MAGED1,NFATC4,NOG,NPNT,NRP1,PDGFRA,PKD2,RASIP1,RSPO2,RSPO3,SEMA3A,SFRP1,SLIT2,SMO,SNAI2,SOX10,SPRY1,TCF21,TEK,TNC,WNT2B
GO:BP	epithelial tube morphogenesis	GO:0060562	1.45739e-11	10.8364	359	1294	64	21354	ACVRL1,AGTR1A,ANGPT1,BMP4,BMP5,CAV3,CC2D2A,CXCL12,DCHS1,EDNRA,ENAH,ENG,EPHA7,ESR1,FAT4,FGF1,FGF2,FOXF1,FZD1,FZD2,GDNF,GJA1,GLI2,GLI3,GPC3,GREM1,HAND1,HAND2,HHIP,HOXA5,IGF1,KDR,KIF26B,LAMA1,MAGED1,NFATC4,NOG,NPNT,NRP1,NTN1,OSR1,PDGFRA,PKD2,PODXL,PRICKLE1,PTK7,RARG,RASIP1,RGMA,RSPO2,RYR2,SFRP1,SHANK3,SLIT2,SMO,SOX17,SPRY1,TBX2,TCF21,TEK,TGFB2,TNC,TWIST1,WNT2B
GO:BP	endothelial cell migration	GO:0043542	1.70452e-11	10.7684	229	1294	49	21354	ACVRL1,ADGRA2,AMOTL1,ANGPT1,ANXA1,ATOH8,ATP2B4,BMP4,BMPER,CCBE1,CDH13,CDH5,CLEC14A,CYP1B1,DCN,FGF1,FGF18,FGF2,FGFR1,FLT4,FSTL1,GATA2,GREM1,HSPB1,IGF1,ITGB1,KDR,LGMN,LOXL2,MEOX2,MMRN2,NOS3,NR2F2,NRP1,PLPP3,PRKD1,PTGS2,PTN,PTPRM,RHOJ,ROBO1,SLIT2,SNAI2,SOX18,SPARC,SRPX2,STC1,TEK,VASH1
GO:BP	divalent inorganic cation transport	GO:0072511	1.98543e-11	10.7021	486	1294	77	21354	ADCYAP1R1,AGTR1A,AKAP6,ANK2,APLNR,ATP1A2,ATP2B3,ATP2B4,BMP4,CACNA1B,CACNA1C,CACNA1G,CACNA1H,CACNA2D3,CACNB1,CACNB2,CACNG4,CALCRL,CASQ1,CASQ2,CAV1,CAV3,CTGF,CXCL12,DMD,DYSF,EDNRA,F2R,FAM155A,FGF2,FKBP1B,GJA1,GJC2,GNAO1,HPCA,HSPA2,IGF1,JPH2,JPH3,JPH4,MICU3,MYLK,NCS1,NGF,NIPA1,NIPAL4,NMUR1,NOL3,NOS1,NOS3,NTSR1,OPRL1,P2RY6,PDGFRB,PKD2,PLN,PLP1,PRKD1,PTGS2,RAMP2,REM1,RGS4,RYR2,SLC24A3,SLC25A23,SLC8A1,…
GO:BP	actin filament-based movement	GO:0030048	2.06862e-11	10.6843	131	1294	36	21354	ACTA2,AKAP6,ANK2,APBB1,ATP1A2,CACNA1C,CACNA1G,CACNB2,CASQ2,CAV1,CAV3,CTNNA3,FGF13,FLNA,FRMD6,FXYD1,GJA5,KCNA5,KCND3,KCNE4,KCNH2,KCNJ5,KCNJ8,LIMCH1,MYH10,NOS1,PARVA,PLN,RNF207,RYR2,SCN1B,SCN5A,SGCD,STC1,TNNT2,TPM1
GO:BP	cardiac muscle cell contraction	GO:0086003	2.11508e-11	10.6747	74	1294	27	21354	AKAP6,ANK2,ATP1A2,CACNA1C,CACNA1G,CACNB2,CASQ2,CAV1,CAV3,CTNNA3,FGF13,FLNA,FXYD1,GJA5,KCNA5,KCND3,KCNE4,KCNH2,KCNJ5,KCNJ8,PLN,RNF207,RYR2,SCN1B,SCN5A,SGCD,STC1
GO:BP	locomotory behavior	GO:0007626	2.32435e-11	10.6337	239	1294	50	21354	ADAM22,ADCY5,ADGRL3,ALDH1A3,APBA1,ASTN1,ATP1A2,B4GALT2,CACNA1B,CACNA1C,CHL1,CHRNA3,CXCL12,DBH,DLG4,ELAVL4,GLRB,GNAO1,GNG7,GPR37,GPRC5B,KCND2,KCNJ10,LEPR,LGI4,LRRTM1,LSAMP,MAPT,MEIS1,NEGR1,NGF,NLGN2,NPY1R,NTSR1,OLFM2,OPRK1,OPRL1,PBX3,PENK,PREX2,RCAN2,SEZ6,SEZ6L,SHANK3,SLC18A2,SNAP25,SNCA,SOBP,TMOD1,UCHL1
GO:BP	tissue migration	GO:0090130	2.37487e-11	10.6244	317	1294	59	21354	ACTA2,ACTG2,ACVRL1,ADGRA2,AMOTL1,ANGPT1,ANXA1,ATOH8,ATP2B4,BMP4,BMPER,CCBE1,CDH13,CDH5,CLEC14A,CYP1B1,DCN,FGF1,FGF18,FGF2,FGF7,FGFR1,FLT4,FOXF1,FSTL1,GATA2,GREM1,HAS2,HSPB1,IGF1,ITGB1,KANK1,KANK2,KDR,LGMN,LOXL2,MEOX2,MMRN2,NOS3,NR2F2,NRP1,PLPP3,PRKD1,PTGS2,PTN,PTPRM,RHOJ,ROBO1,SEMA3A,SLIT2,SNAI2,SOX18,SPARC,SRPX2,STC1,TACR1,TEK,TGFB2,VASH1
GO:BP	muscle cell development	GO:0055001	2.51681e-11	10.5991	191	1294	44	21354	AKAP6,ANK2,BMP4,BVES,CASQ1,CASQ2,CAV2,CAV3,CFL2,COL14A1,CSRP1,DMD,DNER,DYSF,ENG,FHOD3,FLNC,HEY2,IGF1,ITGB1,MYH10,MYH11,MYOCD,MYOF,NFATC4,PDGFRA,PDGFRB,PGM5,PI16,POPDC2,PRKG1,RAMP2,RGS4,SGCB,SGCD,SLC25A4,SMO,SORBS2,SPEG,TMOD1,TNNT2,UCHL1,WFIKKN2,WISP1
GO:BP	smooth muscle contraction	GO:0006939	2.98273e-11	10.5254	112	1294	33	21354	ACTA2,ADRA2B,ADRA2C,ATP1A2,ATP2B4,BDKRB2,CACNA1C,CACNA1G,CALCRL,CALD1,CAV1,CHRM2,CHRNA3,DOCK4,EDNRA,EDNRB,F2R,FKBP1B,GDNF,MRVI1,MYLK,MYOCD,NMUR1,NPNT,NPY1R,NPY2R,PRKG1,PTGS2,TACR1,TACR2,TACR3,TBX2,TIFAB
GO:BP	mesenchymal cell differentiation	GO:0048762	3.04016e-11	10.5171	224	1294	48	21354	BMP4,CDH2,COL1A1,DAB2,DACT3,EDNRA,EDNRB,ENG,FAM83D,FERMT2,FGFR1,FGFR2,FLNA,FN1,FRZB,GDNF,GJA1,GREM1,HAND2,HAS2,HEY2,LOXL2,MYOCD,NOG,NRP1,NRP2,OLFM1,OSR1,PHLDB2,PHOX2B,SEMA3A,SEMA3F,SEMA3G,SFRP1,SMO,SNAI1,SNAI2,SOX10,SPRY1,TCF21,TGFB1I1,TGFB2,TGFB3,TGFBR3,TMEM100,TWIST1,VASN,WWTR1
GO:BP	negative regulation of signal transduction	GO:0009968	3.27683e-11	10.4845	1210	1294	142	21354	ACKR3,ADGRA2,ADGRG3,APC2,APLN,APLNR,APOD,ARHGAP44,ASPN,ATP2B4,BDKRB2,BEND6,BMP4,BMP5,BMPER,C1QTNF3,CADM4,CAV1,CAV2,CAV3,CCDC3,CD109,CDH2,CELF4,CHRD,CHRDL1,CIDEA,CX3CR1,CXCL12,CYP7B1,DAB2,DACT1,DACT3,DCN,DKK2,DKK3,DLC1,DMD,ECM1,EMILIN1,ENG,ENHO,EPN2,ESR1,FAIM2,FBN1,FRZB,FSTL3,FZD1,GAS1,GATA2,GDNF,GLI2,GLI3,GPC3,GPR161,GPR37L1,GPRASP1,GRB10,GRB14,GREM1,GREM2,HEY2,HGF,HHIP,HSPB1,HTRA3,IGF1,IGF1R,IGF…
GO:BP	muscle cell differentiation	GO:0042692	3.64505e-11	10.4383	394	1294	67	21354	AKAP6,ANK2,AW551984,BMP4,BVES,CASQ1,CASQ2,CAV2,CAV3,CDH2,CFH,CFL2,COL14A1,CSRP1,CXCL12,DMD,DMPK,DNER,DYSF,EDNRB,EHD2,ENG,FHOD3,FLNC,FOXF1,GREM1,HAND2,HEY2,IGF1,IGFBP5,ITGA8,ITGB1,JAM2,MYH10,MYH11,MYOCD,MYOF,NFATC4,NPNT,OLFM2,PDGFRA,PDGFRB,PGM5,PI16,POPDC2,PRDM6,PRKG1,RAMP2,RBM24,RBPMS2,RGS4,RORA,SGCB,SGCD,SLC25A4,SMO,SORBS2,SPEG,TBX2,TMEM119,TMEM204,TMOD1,TNNT2,UCHL1,WFIKKN2,WISP1,ZEB1
GO:BP	cardiac muscle contraction	GO:0060048	5.74103e-11	10.241	135	1294	36	21354	AKAP6,ANK2,ATP1A2,CACNA1C,CACNA1G,CACNB2,CASQ2,CAV1,CAV3,CTGF,CTNNA3,DMD,FGF13,FKBP1B,FLNA,FXYD1,GJA5,KCNA5,KCND3,KCNE4,KCNH2,KCNJ5,KCNJ8,MYL1,PLN,RNF207,RYR2,SCN1B,SCN5A,SGCD,SLC8A1,SMTN,STC1,TNNT2,TPM1,VEGFB
GO:BP	secretion by cell	GO:0032940	5.97938e-11	10.2233	859	1294	111	21354	ADCY1,ADCY5,ADCYAP1,AGTR1A,ANXA1,APBA1,APBB1,APLN,AXL,BACE1,BRSK1,BRSK2,C1QTNF3,CACNA1B,CACNA1C,CACNA1G,CACNB2,CADPS,CD200,CHRM2,CHRNA3,CHRNA5,CNR1,CPLX1,CTGF,CXCL12,DMTN,DOC2B,EFNA5,ENG,ENHO,EXOC3L2,F2R,FGF7,FGFR1,FKBP1B,FOXF1,FRMD4A,GABBR1,GAL,GATA2,GCGR,GJA1,GJA5,GPR27,IGF1,IGFBP3,ILDR2,IRS1,KCNA2,KCNB1,KCNC4,LEPR,LIN7B,LTBP4,MYH10,MYOM1,NAPB,NCS1,NELL2,NGF,NKD2,NLGN2,NOS1,NPY1R,NPY2R,NTSR1,OL…
GO:BP	transmembrane receptor protein serine/threonine kinase signaling pathway	GO:0007178	6.05508e-11	10.2179	351	1294	62	21354	9330182L06RIK,ACVRL1,ASPN,ATOH8,BMP4,BMP5,BMPER,CAV1,CAV2,CAV3,CD109,CDH5,CERS1,CHRD,CHRDL1,CIDEA,COL1A2,COL3A1,DAB2,EMILIN1,ENG,FBN1,FERMT2,FSTL1,FSTL3,FZD1,GDF10,GDNF,GPC3,GREM1,GREM2,HTRA3,ITGA8,LRRC32,LTBP1,LTBP3,LTBP4,MYOCD,NOG,NPNT,PEG10,PPM1L,RBPMS,RBPMS2,RGMA,RGMB,ROR2,SFRP1,SMAD9,SPRY1,TGFB1I1,TGFB2,TGFB3,TGFBR3,TMEM100,TWSG1,VASN,WFIKKN2,WWTR1,ZCCHC12,ZEB1,ZFP423
GO:BP	synapse assembly	GO:0007416	6.63768e-11	10.178	188	1294	43	21354	ADGRB2,ADGRL1,ADGRL3,AMIGO1,ARHGEF9,ASIC2,CADM1,CBLN2,CDH2,CLSTN2,CLSTN3,CNTN5,EFNA5,EPHA7,FGF13,FLRT2,FZD1,GABRB3,GAP43,GPC6,LGI2,LRFN1,LRRC4B,LRRN3,LRRTM1,MAP1B,MAPT,MUSK,NLGN2,NTN1,OBSL1,PCDH17,PPP1R9A,PTPRS,SDK1,SDK2,SHANK3,SLITRK3,SLITRK5,SNCA,SRPX2,SYNDIG1,THBS2
GO:BP	taxis	GO:0042330	7.01623e-11	10.1539	621	1294	89	21354	ACKR3,ACKR4,ADGRA2,AGTR1A,ANGPT1,ANXA1,APBB1,ARTN,BMP4,BOC,C3AR1,C5AR1,CCDC141,CDH13,CHL1,CHN1,CMTM5,CNTN5,COLEC10,CX3CR1,CXCL12,CXCL14,CYP7B1,DOCK4,DYSF,EDNRA,EDNRB,EFNA5,ENAH,ENG,EPHA7,ETV1,FGF1,FGF18,FGF2,FGF7,FGFR1,FLRT2,FLT1,FN1,GAP43,GAS1,GDNF,GLI2,GLI3,GREM1,HGF,HSPB1,ITGA9,JAM3,KDR,KIF5A,KIF5C,LAMA1,LAMA2,LAMB2,LGMN,MYH10,NEXN,NLGN2,NOG,NOTCH3,NRP1,NRP2,NTN1,PARVA,PDGFD,PDGFRA,PDGFRB,PLXN…
GO:BP	positive regulation of signal transduction	GO:0009967	8.86876e-11	10.0521	1506	1294	165	21354	9330182L06RIK,ACKR3,ACTA2,ACVRL1,ADCYAP1,ADCYAP1R1,ADGRA2,ADRA2B,ADRA2C,AFAP1L2,AGTR1A,AKAP12,AKAP6,ALDH1A3,ANGPT1,AXL,BMP4,BMP5,BMPER,C1QTNF2,C1QTNF3,C5AR1,CAV1,CAV2,CCBE1,CDH13,CDH2,CDH3,CDH5,CERS1,COL1A1,COL3A1,CSPG4,CTGF,CX3CR1,CYP1B1,DAAM2,DAB2,DACT1,DCN,DKK2,DLG4,DMTN,EDA,EDAR,EDNRA,ENG,ENHO,EPN2,EPOR,ESR1,EVC,F2R,F3,FERMT2,FGF1,FGF18,FGF2,FGFR1,FGFR2,FLNA,FLT1,FLT4,GAS1,GAS2L2,GDF10,GPBAR1…
GO:BP	striated muscle contraction	GO:0006941	9.0922e-11	10.0413	174	1294	41	21354	AKAP6,ANK2,ATP1A2,CACNA1C,CACNA1G,CACNB2,CASQ1,CASQ2,CAV1,CAV3,CTGF,CTNNA3,DMD,DMPK,FGF13,FKBP1B,FLNA,FXYD1,GJA5,KCNA5,KCND3,KCNE4,KCNH2,KCNJ5,KCNJ8,MYL1,NOS1,PLN,RNF207,RYR2,SCN1B,SCN5A,SGCD,SLC8A1,SMTN,STAC,STC1,SYNM,TNNT2,TPM1,VEGFB
GO:BP	cardiac muscle tissue development	GO:0048738	9.109e-11	10.0405	247	1294	50	21354	AKAP6,ANGPT1,AW551984,BMP4,BMP5,BVES,CAV3,CCM2L,COL14A1,ENG,EPOR,FGF1,FGF2,FGFR1,FHOD3,GJA1,GJA5,GJC1,GREM1,HAND1,HAND2,HEY2,IGF1,ITGB1,JPH2,KCNK2,MEIS1,MYH10,MYH11,MYOCD,NOG,PDGFRA,PDGFRB,PI16,PLN,POPDC2,PRKG1,RGS4,RYR2,SGCB,SGCD,SLC25A4,SORBS2,SPEG,TBX2,TGFB2,TNNT2,TPM1,WISP1,ZFPM2
GO:BP	negative regulation of response to stimulus	GO:0048585	9.46134e-11	10.024	1607	1294	173	21354	ACKR3,ADAMTS18,ADCYAP1,ADGRA2,ADGRG3,ANXA1,AOAH,APC2,APLN,APLNR,APOD,ARHGAP44,ASPN,ATP2B4,BACE1,BDKRB2,BEND6,BMP4,BMP5,BMPER,C1QTNF3,CADM4,CALCRL,CAV1,CAV2,CAV3,CCDC3,CD109,CDH2,CDH5,CELF4,CHRD,CHRDL1,CIDEA,COL3A1,CTNNA2,CX3CR1,CXCL12,CYP7B1,DAB2,DACT1,DACT3,DCN,DKK2,DKK3,DLC1,DMD,ECM1,EMILIN1,ENG,ENHO,EPN2,EPOR,ESR1,FAIM2,FBN1,FGF2,FKBP1B,FOXF1,FRZB,FSTL3,FZD1,GAS1,GATA2,GDNF,GJA1,GLI2,GLI3,GPC3…
GO:BP	chemotaxis	GO:0006935	1.19187e-10	9.92377	616	1294	88	21354	ACKR3,ACKR4,ADGRA2,AGTR1A,ANGPT1,ANXA1,APBB1,ARTN,BMP4,BOC,C3AR1,C5AR1,CCDC141,CDH13,CHL1,CHN1,CMTM5,CNTN5,COLEC10,CX3CR1,CXCL12,CXCL14,CYP7B1,DOCK4,DYSF,EDNRA,EDNRB,EFNA5,ENAH,ENG,EPHA7,ETV1,FGF1,FGF18,FGF2,FGF7,FGFR1,FLRT2,FLT1,FN1,GAP43,GAS1,GDNF,GLI2,GLI3,GREM1,HGF,HSPB1,ITGA9,JAM3,KDR,KIF5A,KIF5C,LAMA1,LAMA2,LAMB2,LGMN,MYH10,NEXN,NOG,NOTCH3,NRP1,NRP2,NTN1,PARVA,PDGFD,PDGFRA,PDGFRB,PLXNA4,PLX…
GO:BP	neurotransmitter transport	GO:0006836	1.24966e-10	9.90321	232	1294	48	21354	ADCY1,APBA1,ATP1A2,BACE1,BRSK1,CACNA1B,CACNB2,CADPS,CHRM2,CHRNA3,CHRNA5,CNR1,CPLX1,DOC2B,GDNF,GFAP,ITGB1,KCNC4,KCNJ10,LIN7B,NAPB,NCS1,NGF,NOS1,PPP1R9A,RAB3B,RIMS3,RPH3A,SLC10A4,SLC18A2,SLC29A1,SLC6A15,SLC6A17,SNAP25,SNCA,SNCAIP,SV2A,SV2B,SYN1,SYN2,SYNGR3,SYP,SYT1,SYT17,SYT4,SYT6,SYT9,TACR2
GO:BP	cellular cation homeostasis	GO:0030003	1.276e-10	9.89415	670	1294	93	21354	ACKR3,ACKR4,ADCY5,ADCYAP1,ADCYAP1R1,AGTR1A,AKAP6,ANK2,APLNR,ATP1A2,ATP1B2,ATP2B3,ATP2B4,BDKRB2,BMP4,C3AR1,C5AR1,C7,CACNA1C,CACNA1G,CACNB2,CALB2,CASQ1,CASQ2,CAV1,CAV2,CAV3,CDH5,CNR1,CX3CR1,DLG4,DMD,DMPK,EDNRA,EDNRB,EPOR,ESR1,F2R,FAM155A,FGF2,FKBP1B,FXYD1,FZD2,GALR2,GATA2,GJA1,GPR20,GPR4,GRIA1,JPH2,JPH3,KCNA5,KCNK3,KCTD17,MICU3,NCS1,NGF,NOL3,NOS1,NPY1R,NPY2R,NTSR1,OPRL1,P2RY6,PDGFRA,PKD2,PLN,PRKD1,…
GO:BP	cellular ion homeostasis	GO:0006873	1.55878e-10	9.80721	683	1294	94	21354	ACKR3,ACKR4,ADCY5,ADCYAP1,ADCYAP1R1,AGTR1A,AKAP6,ANK2,APLNR,ATP1A2,ATP1B2,ATP2B3,ATP2B4,BDKRB2,BMP4,C3AR1,C5AR1,C7,CACNA1C,CACNA1G,CACNB2,CALB2,CASQ1,CASQ2,CAV1,CAV2,CAV3,CDH5,CNR1,CX3CR1,DLG4,DMD,DMPK,EDNRA,EDNRB,EPOR,ESR1,F2R,FAM155A,FGF2,FKBP1B,FXYD1,FZD2,GALR2,GATA2,GJA1,GPR20,GPR4,GRIA1,JPH2,JPH3,KCNA5,KCNK3,KCTD17,MICU3,NCS1,NGF,NOL3,NOS1,NPY1R,NPY2R,NTSR1,OPRL1,P2RY6,PDGFRA,PKD2,PLN,PRKD1,…
GO:BP	regulation of neurotransmitter levels	GO:0001505	1.62946e-10	9.78796	242	1294	49	21354	ADCY1,APBA1,ATP1A2,BACE1,BRSK1,CACNA1B,CACNB2,CADPS,CHRM2,CHRNA3,CHRNA5,CNR1,CPLX1,DBH,DOC2B,GDNF,GFAP,HNMT,ITGB1,KCNC4,KCNJ10,LIN7B,MOXD1,NAALAD2,NAPB,NCS1,NGF,NOS1,PPP1R9A,RAB3B,RIMS3,RPH3A,SLC18A2,SLC29A1,SLC5A7,SNAP25,SNCA,SNCAIP,SV2A,SYN1,SYN2,SYNGR3,SYP,SYT1,SYT17,SYT4,SYT6,SYT9,TACR2
GO:BP	ion homeostasis	GO:0050801	2.16162e-10	9.66522	819	1294	106	21354	ACKR3,ACKR4,ADCY5,ADCYAP1,ADCYAP1R1,AGTR1A,AKAP6,ANK1,ANK2,APLNR,ATP1A2,ATP1B2,ATP2B3,ATP2B4,BDKRB2,BMP4,C3AR1,C5AR1,C7,CACNA1C,CACNA1G,CACNB2,CALB2,CAR14,CASQ1,CASQ2,CAV1,CAV2,CAV3,CDH5,CNR1,CX3CR1,DCN,DLG4,DMD,DMPK,EDNRA,EDNRB,EPOR,ESR1,F2R,FAM155A,FGF2,FKBP1B,FXYD1,FZD2,GALR2,GATA2,GJA1,GJA5,GPR20,GPR4,GRIA1,JPH2,JPH3,KCNA5,KCNH2,KCNJ10,KCNK3,KCTD17,KDR,MICU3,NCS1,NGF,NOL3,NOS1,NPY1R,NPY2R,NTS…
GO:BP	regulation of cell projection organization	GO:0031344	2.29768e-10	9.63871	731	1294	98	21354	ADAMTS1,ADCYAP1,AMIGO1,APBB1,ARHGAP44,ATP1B2,BMP4,BMP5,BRSK1,BRSK2,CAV1,CDC42EP3,CDH2,CDKL5,CHN1,CHODL,CHRNA3,CNR1,CNTN1,CPEB1,CSPG4,CTNNA2,CXCL12,DLG4,DMD,DMTN,DZIP1,EFEMP1,EFNA5,ELAVL4,EPHA7,EPOR,FEZ1,FGFR1,FKBP1B,FLNA,FN1,FZD1,GAP43,GFAP,GPRC5B,HECW2,HGF,HSPB1,ITGB1,KANK1,KCTD17,KIF1A,LRRC4C,MAP1B,MAPT,MARK1,MYO9A,NCS1,NDRG4,NEFL,NEGR1,NFATC4,NGF,NR2F1,NRP1,NTN1,NUMBL,OBSL1,P3H1,PLXNA4,PLXNB3,…
GO:BP	gland morphogenesis	GO:0022612	2.45215e-10	9.61045	141	1294	36	21354	BMP4,CAV1,CAV3,CYP7B1,EDA,EDAR,ESR1,FGF1,FGF18,FGF7,FGFR1,GLI2,GLI3,HGF,ID4,IGF1,IGFBP5,LAMA1,LIMS2,MMP2,NKX2-3,NOG,NRP1,NTN1,PLAU,PTN,RARG,SEMA3A,SFRP1,SLIT2,SNAI2,TBX2,TGFB2,TGFB3,TNC,TWSG1
GO:BP	calcium ion transmembrane transport	GO:0070588	2.73634e-10	9.56283	316	1294	57	21354	AGTR1A,AKAP6,ANK2,APLNR,ATP1A2,ATP2B3,ATP2B4,BMP4,CACNA1B,CACNA1C,CACNA1G,CACNA1H,CACNA2D3,CACNB1,CACNB2,CACNG4,CASQ1,CASQ2,CAV3,DMD,DYSF,EDNRA,F2R,FAM155A,FGF2,FKBP1B,GJC2,HPCA,HSPA2,JPH2,JPH3,MICU3,NCS1,NGF,NOL3,NTSR1,OPRL1,P2RY6,PKD2,PLN,PLP1,PRKD1,REM1,RYR2,SLC24A3,SLC25A23,SLC8A1,SLC8A2,SNCA,STAC,TGFB2,TRDN,TRPC1,TRPC3,TRPC4,TRPC6,XCR1
GO:BP	heart morphogenesis	GO:0003007	2.85153e-10	9.54492	254	1294	50	21354	ACVRL1,ADAMTS1,ADGRG6,ANGPT1,BMP4,BMP5,CAV3,CCM2L,COL5A1,DCHS1,ENG,EPOR,FAT4,FLNA,FLRT2,FOXF1,FZD1,FZD2,GJA1,GJA5,HAND1,HAND2,HAS2,HEY2,NOG,NOS3,NPY1R,NPY2R,NRP1,NRP2,OLFM1,PARVA,PKD2,RYR2,SLIT2,SLIT3,SMO,SNAI1,SNAI2,SOX17,SPRY1,TBX2,TEK,TGFB2,TGFBR3,TMEM100,TNNT2,TPM1,TWIST1,ZFPM2
GO:BP	positive regulation of cell population proliferation	GO:0008284	3.15228e-10	9.50138	1054	1294	126	21354	ACVRL1,ADAMTS1,ADCYAP1,AGTR1A,ANXA1,APLN,APLNR,BMP4,BMP5,C3AR1,C5AR1,CALCRL,CAV1,CAV2,CAV3,CD248,CDH13,CDH3,CHRD,CNTFR,COL18A1,CRIP2,CTGF,CX3CR1,CXCL12,CYP7B1,DDR2,DMD,DYSF,ECM1,EDNRA,EDNRB,EFEMP1,EPOR,ESR1,F2R,F3,FBLN5,FERMT2,FGF1,FGF18,FGF2,FGF7,FGFR1,FGFR2,FLNA,FLT4,FN1,FOXF1,FOXP2,GAS1,GATA2,GDNF,GFAP,GJA1,GJC2,GLI2,GLI3,GPBAR1,GPR37L1,GREM1,HAS2,HEY2,HLX,HPSE2,ID4,IGF1,IGF1R,IGFBP2,IGFBP5,IT…
GO:BP	epithelial cell migration	GO:0010631	3.19872e-10	9.49502	308	1294	56	21354	ACVRL1,ADGRA2,AMOTL1,ANGPT1,ANXA1,ATOH8,ATP2B4,BMP4,BMPER,CCBE1,CDH13,CDH5,CLEC14A,CYP1B1,DCN,FGF1,FGF18,FGF2,FGF7,FGFR1,FLT4,FSTL1,GATA2,GREM1,HAS2,HSPB1,IGF1,ITGB1,KANK1,KANK2,KDR,LGMN,LOXL2,MEOX2,MMRN2,NOS3,NR2F2,NRP1,PLPP3,PRKD1,PTGS2,PTN,PTPRM,RHOJ,ROBO1,SEMA3A,SLIT2,SNAI2,SOX18,SPARC,SRPX2,STC1,TACR1,TEK,TGFB2,VASH1
GO:BP	cation homeostasis	GO:0055080	3.20431e-10	9.49427	757	1294	100	21354	ACKR3,ACKR4,ADCY5,ADCYAP1,ADCYAP1R1,AGTR1A,AKAP6,ANK1,ANK2,APLNR,ATP1A2,ATP1B2,ATP2B3,ATP2B4,BDKRB2,BMP4,C3AR1,C5AR1,C7,CACNA1C,CACNA1G,CACNB2,CALB2,CAR14,CASQ1,CASQ2,CAV1,CAV2,CAV3,CDH5,CNR1,CX3CR1,DLG4,DMD,DMPK,EDNRA,EDNRB,EPOR,ESR1,F2R,FAM155A,FGF2,FKBP1B,FXYD1,FZD2,GALR2,GATA2,GJA1,GPR20,GPR4,GRIA1,JPH2,JPH3,KCNA5,KCNH2,KCNJ10,KCNK3,KCTD17,MICU3,NCS1,NGF,NOL3,NOS1,NPY1R,NPY2R,NTSR1,OPRL1,P2RY…
GO:BP	regulation of plasma membrane bounded cell projection organization	GO:0120035	3.49684e-10	9.45632	714	1294	96	21354	ADAMTS1,ADCYAP1,AMIGO1,APBB1,ARHGAP44,ATP1B2,BMP4,BMP5,BRSK1,BRSK2,CAV1,CDC42EP3,CDH2,CDKL5,CHN1,CHODL,CHRNA3,CNR1,CNTN1,CPEB1,CSPG4,CTNNA2,CXCL12,DMD,DMTN,DZIP1,EFEMP1,EFNA5,ELAVL4,EPHA7,EPOR,FEZ1,FGFR1,FKBP1B,FLNA,FN1,FZD1,GAP43,GFAP,GPRC5B,HECW2,HGF,HSPB1,ITGB1,KANK1,KCTD17,KIF1A,LRRC4C,MAP1B,MAPT,MARK1,NCS1,NDRG4,NEFL,NEGR1,NFATC4,NGF,NR2F1,NRP1,NTN1,NUMBL,OBSL1,P3H1,PLXNA4,PLXNB3,PODXL,PPP1R…
GO:BP	inorganic ion homeostasis	GO:0098771	3.74965e-10	9.42601	770	1294	101	21354	ACKR3,ACKR4,ADCY5,ADCYAP1,ADCYAP1R1,AGTR1A,AKAP6,ANK1,ANK2,APLNR,ATP1A2,ATP1B2,ATP2B3,ATP2B4,BDKRB2,BMP4,C3AR1,C5AR1,C7,CACNA1C,CACNA1G,CACNB2,CALB2,CAR14,CASQ1,CASQ2,CAV1,CAV2,CAV3,CDH5,CNR1,CX3CR1,DLG4,DMD,DMPK,EDNRA,EDNRB,EPOR,ESR1,F2R,FAM155A,FGF2,FKBP1B,FXYD1,FZD2,GALR2,GATA2,GJA1,GPR20,GPR4,GRIA1,JPH2,JPH3,KCNA5,KCNH2,KCNJ10,KCNK3,KCTD17,MICU3,NCS1,NGF,NOL3,NOS1,NPY1R,NPY2R,NTSR1,OPRL1,P2RY…
GO:BP	action potential	GO:0001508	3.90091e-10	9.40883	143	1294	36	21354	ANK2,CACNA1C,CACNA1G,CACNA1H,CACNB2,CAV1,CAV3,CNR1,CTNNA3,DMD,DPP6,FGF13,FKBP1B,FLNA,GJA5,GRIA1,KCNA2,KCNA5,KCNB1,KCNC2,KCNC4,KCND2,KCND3,KCNE4,KCNH2,KCNJ5,KCNJ8,NTSR1,RNF207,RYR2,SCN11A,SCN1B,SCN5A,SCN7A,SLC8A2,TACR1
GO:BP	response to organic cyclic compound	GO:0014070	4.37426e-10	9.3591	1047	1294	125	21354	ABCC9,ADCY1,ADCY5,ADCYAP1,ADCYAP1R1,ADGRL3,AGTR1A,AKAP6,ANXA1,ATP1A2,ATP2B4,BMP4,CACNA1B,CACNG4,CALY,CASQ2,CAV1,CAV2,CHRM2,CIDEA,CNGA3,CNR1,COL1A1,COLEC12,CRYAB,CTGF,CYP1B1,CYP7B1,DAB2,DHH,DLG4,DMTN,EDNRA,EDNRB,EFNA5,EIF4EBP1,ELAVL4,ESR1,FAM107A,FIBIN,FKBP1B,FLNA,FOXF1,FOXP2,GABRB3,GDAP1,GDNF,GJA1,GLI2,GNAI1,GNAO1,GPBAR1,HNMT,HPCA,HTR3A,HTR3B,IGF1,IGFBP2,IGFBP5,IGFBP7,KANK2,KCNC2,KCNJ8,KCNMB1,LUM…
GO:BP	epithelium migration	GO:0090132	4.87006e-10	9.31247	311	1294	56	21354	ACVRL1,ADGRA2,AMOTL1,ANGPT1,ANXA1,ATOH8,ATP2B4,BMP4,BMPER,CCBE1,CDH13,CDH5,CLEC14A,CYP1B1,DCN,FGF1,FGF18,FGF2,FGF7,FGFR1,FLT4,FSTL1,GATA2,GREM1,HAS2,HSPB1,IGF1,ITGB1,KANK1,KANK2,KDR,LGMN,LOXL2,MEOX2,MMRN2,NOS3,NR2F2,NRP1,PLPP3,PRKD1,PTGS2,PTN,PTPRM,RHOJ,ROBO1,SEMA3A,SLIT2,SNAI2,SOX18,SPARC,SRPX2,STC1,TACR1,TEK,TGFB2,VASH1
GO:BP	response to oxygen-containing compound	GO:1901700	5.21882e-10	9.28243	1817	1294	187	21354	ABCC9,ADCY1,ADCY5,ADCYAP1,ADCYAP1R1,ADGRL3,AGTR1A,AKAP12,AKAP6,AMIGO1,ANXA1,APOD,ATP1A2,ATP2B4,AXL,BACE1,BMP4,BRSK2,C1QTNF9,C5AR1,CACNA1B,CACNB1,CACNG4,CALCRL,CALY,CAV1,CAV2,CERS1,CHRM2,CHRNA3,CNGA3,CNR1,COL16A1,COL1A1,COL1A2,COL3A1,COL5A2,COL6A1,COL6A2,CPEB1,CRYAB,CTGF,CX3CR1,CXCL12,CYP1B1,DAPK1,DBH,DCN,DHH,DLG4,DMD,DMTN,EDNRA,EDNRB,EFNA5,EIF4EBP1,ELAVL4,ENHO,EPOR,ESR1,F2R,FABP3,FBLN5,FBN1,FGFR2…
GO:BP	secretion	GO:0046903	5.56981e-10	9.25416	1027	1294	123	21354	ADCY1,ADCY5,ADCYAP1,AGTR1A,ANXA1,APBA1,APBB1,APLN,AXL,BACE1,BDKRB2,BRSK1,BRSK2,C1QTNF3,CACNA1B,CACNA1C,CACNA1G,CACNB2,CADPS,CAV1,CD200,CHRM2,CHRNA3,CHRNA5,CNR1,CPLX1,CTGF,CXCL12,DMTN,DOC2B,EDNRA,EDNRB,EFNA5,ENG,ENHO,EXOC3L2,F2R,FBLN5,FGF7,FGFR1,FKBP1B,FOXF1,FRMD4A,GABBR1,GAL,GATA2,GCGR,GJA1,GJA5,GPR27,IGF1,IGFBP3,ILDR2,IRS1,KCNA2,KCNB1,KCNC4,LEPR,LIN7B,LTBP4,MYH10,MYOM1,NAPB,NCS1,NELL2,NGF,NKD2,N…
GO:BP	cell-cell adhesion via plasma-membrane adhesion molecules	GO:0098742	5.68048e-10	9.24561	276	1294	52	21354	ADGRL1,ADGRL3,AMIGO1,CADM1,CADM3,CCDC141,CDH11,CDH13,CDH19,CDH2,CDH3,CDH5,CDH6,CLSTN2,CLSTN3,CNTN5,COLEC10,DCHS1,DSC3,EFNA5,FAT4,GPC6,LRRC4B,LRRC4C,MCAM,NEXN,OBSL1,PCDH10,PCDH12,PCDH17,PCDH18,PCDH7,PCDH9,PCDHB17,PCDHB18,PCDHB9,PCDHGA10,PCDHGA2,PCDHGA3,PCDHGB2,PCDHGC3,PLXNB3,PTPRM,PTPRS,ROBO1,SCARF2,SDK1,SDK2,SELP,SLITRK3,SPARCL1,TGFB2
GO:BP	negative regulation of cell population proliferation	GO:0008285	7.47971e-10	9.12612	701	1294	94	21354	ACVRL1,ADARB1,ADCYAP1,APLN,APOD,ATOH8,BDKRB2,BMP4,BMP5,CAV1,CAV2,CD109,CDH13,CDH5,CNN1,CPEB1,CYP1B1,DLC1,DPT,ENG,ESR1,F2R,FBXO2,FGF2,FGFR2,FLT1,FRZB,GABBR1,GAL,GAS1,GATA2,GJA1,GLI3,GPC3,GREM1,IFITM3,IGF1,IGFBP3,IGFBP5,ITGB1,KANK2,KCNK2,LIMS2,LRRC32,MAGED1,MEIS1,MN1,MYOCD,NDN,NDRG4,NELL1,NOG,NOS1,NOS3,NPR1,NR2F2,P3H2,P3H3,PHOX2B,PRKG1,PTGES,PTGIR,PTGS2,PTH1R,PTN,PTPN14,PTPRM,PTPRU,RARG,RERG,RGS5,R…
GO:BP	regulation of calcium ion transmembrane transport	GO:1903169	7.85417e-10	9.1049	169	1294	39	21354	AGTR1A,AKAP6,ANK2,APLNR,ATP1A2,BMP4,CACNA1C,CACNB1,CACNB2,CASQ1,CASQ2,CAV3,DMD,DYSF,EDNRA,F2R,FKBP1B,GJC2,HPCA,HSPA2,JPH2,JPH3,NGF,NOL3,NTSR1,OPRL1,P2RY6,PKD2,PLN,PLP1,PRKD1,REM1,RYR2,SLC8A1,SNCA,STAC,TGFB2,TRDN,TRPC1
GO:BP	positive regulation of cell differentiation	GO:0045597	8.15843e-10	9.08839	916	1294	113	21354	ACVRL1,ADRA2B,ADRA2C,AKAP6,AMIGO1,ANXA1,ATOH8,AXL,BEND6,BMP4,BOC,CAV3,CCDC3,CDH5,CDKL5,CHODL,COL1A1,CTGF,CX3CR1,CXCL12,DAB2,DACT1,DDR2,DMD,DMTN,EFNA5,ENG,FERMT2,FEZ1,FGF18,FGF2,FGFR1,FLNA,FN1,FRZB,GATA2,GDF10,GDNF,GFAP,GJA1,GJC2,GLI2,GLI3,GPRC5B,GREM1,H2AFY2,HAS2,HLX,HOXA5,IGF1,IGFBP3,ITGB1,LIMS2,LOXL2,LRP3,LTBP3,MAP1B,MAPT,MMD2,MTURN,MUSTN1,MYOCD,NEFL,NELL1,NGF,NOG,NPNT,NRP1,NTN1,NUMBL,OBSL1,OLF…
GO:BP	cellular response to stimulus	GO:0051716	9.28292e-10	9.03232	8382	1294	632	21354	9330182L06RIK,ABCG4,ACKR1,ACKR3,ACKR4,ACTA2,ACVRL1,ADAM22,ADAMTS7,ADCY1,ADCY5,ADCYAP1,ADCYAP1R1,ADGRA2,ADGRB2,ADGRE1,ADGRF5,ADGRG3,ADGRG6,ADGRL1,ADGRL3,ADGRL4,ADRA2B,ADRA2C,AFAP1L2,AGTR1A,AHRR,AK4,AKAP12,AKAP6,ALDH1A3,AMIGO1,AMOTL1,ANGPT1,ANGPTL1,ANK1,ANK2,ANXA1,APBB1,APC2,APH1C,APLN,APLNR,APOD,ARHGAP20,ARHGAP23,ARHGAP44,ARHGAP6,ARHGEF25,ARHGEF9,ARTN,ASIC2,ASPN,ATOH8,ATP1A2,ATP2B4,AXL,BACE1,BBS7,…
GO:BP	branching morphogenesis of an epithelial tube	GO:0048754	9.60742e-10	9.01739	170	1294	39	21354	AGTR1A,ANGPT1,BMP4,CAV3,CXCL12,DCHS1,EDNRA,ENG,ESR1,FAT4,FGF1,FGF2,FOXF1,GDNF,GLI2,GLI3,GPC3,GREM1,HHIP,HOXA5,IGF1,KDR,LAMA1,MAGED1,NFATC4,NOG,NPNT,NRP1,PDGFRA,PKD2,RASIP1,RSPO2,SLIT2,SMO,SPRY1,TCF21,TEK,TNC,WNT2B
GO:BP	regulation of phosphate metabolic process	GO:0019220	1.75783e-09	8.75502	1572	1294	166	21354	ACVRL1,ADARB1,ADCYAP1,ADCYAP1R1,ADGRF5,ADRA2B,ADRA2C,AFAP1L2,AGTR1A,AK4,AKAP6,ANGPT1,APLN,APLNR,ATP2B4,AXL,BDKRB2,BMP4,BMP5,BMPER,C1QTNF2,C1QTNF9,C5AR1,CADM4,CAV1,CAV2,CAV3,CCDC8,CD109,CDH5,CERS1,CHRNA3,CLIP3,CNTN1,CSPG4,CTGF,CX3CR1,DAB2,DDR2,DLC1,DLG2,DLG4,DMD,DMPK,DMTN,EDNRA,EDNRB,EEF1A2,EFNA5,EMILIN1,ENG,EPHA7,F2R,FABP3,FAM129A,FAM212B,FBN1,FERMT2,FGF1,FGF13,FGF18,FGF2,FGF7,FGFR1,FKBP1B,FLT1,F…
GO:BP	regulation of phosphorus metabolic process	GO:0051174	1.85459e-09	8.73175	1573	1294	166	21354	ACVRL1,ADARB1,ADCYAP1,ADCYAP1R1,ADGRF5,ADRA2B,ADRA2C,AFAP1L2,AGTR1A,AK4,AKAP6,ANGPT1,APLN,APLNR,ATP2B4,AXL,BDKRB2,BMP4,BMP5,BMPER,C1QTNF2,C1QTNF9,C5AR1,CADM4,CAV1,CAV2,CAV3,CCDC8,CD109,CDH5,CERS1,CHRNA3,CLIP3,CNTN1,CSPG4,CTGF,CX3CR1,DAB2,DDR2,DLC1,DLG2,DLG4,DMD,DMPK,DMTN,EDNRA,EDNRB,EEF1A2,EFNA5,EMILIN1,ENG,EPHA7,F2R,FABP3,FAM129A,FAM212B,FBN1,FERMT2,FGF1,FGF13,FGF18,FGF2,FGF7,FGFR1,FKBP1B,FLT1,F…
GO:BP	positive regulation of epithelial cell proliferation	GO:0050679	2.27184e-09	8.64362	207	1294	43	21354	ACVRL1,AGTR1A,APLN,APLNR,BMP4,BMP5,C5AR1,CAV1,CAV2,CDH13,CDH3,CXCL12,CYP7B1,DYSF,ECM1,ESR1,F3,FGF1,FGF18,FGF2,FGF7,FGFR1,FLT4,FOXP2,GAS1,GATA2,GPBAR1,HAS2,IGF1,KDR,NOG,OSR1,PLXNB3,PRKD1,PTN,PTPRN,SCG2,SCN5A,SFRP1,SMO,TACR1,TWIST1,VEGFB
GO:BP	positive regulation of cellular component organization	GO:0051130	2.57581e-09	8.58909	1206	1294	136	21354	ADAMTS1,ADCYAP1,ADGRB2,ADGRL1,ADGRL3,AMIGO1,ANGPT1,ANK1,ANXA1,APBB1,APLN,ARHGEF15,ASIC2,ATP1B2,AXL,BMP4,BMP5,CALY,CAV1,CAV3,CBLN2,CDC42EP3,CDH5,CDKL5,CFL2,CHODL,CLIP3,CLSTN2,CLSTN3,CNR1,CNTN1,COL16A1,CPEB1,CTGF,CTNNA2,CXCL12,DAB2,DCN,DDR2,DLG4,DMD,DOC2B,DZIP1,EFEMP1,EFNA5,EHD2,ELAVL4,EMILIN1,EPOR,ESR1,FERMT2,FEZ1,FGFR1,FKBP1B,FLNA,FLRT2,FMN2,FN1,FZD1,GATA2,GPC3,GPRC5B,GREM1,HGF,HIP1,HSPB1,IGF1,IT…
GO:BP	cardiac conduction	GO:0061337	3.02621e-09	8.5191	64	1294	23	21354	ABCC9,ANK2,CACNA1C,CACNA1G,CACNB2,CAV1,CTNNA3,FLNA,GJA1,GJA5,GJC1,GJD3,KCNA5,KCND3,KCNE4,KCNH2,KCNJ5,PLN,RYR2,SCN1B,SCN5A,SLC4A3,SLC8A1
GO:BP	homophilic cell adhesion via plasma membrane adhesion molecules	GO:0007156	3.0777e-09	8.51177	168	1294	38	21354	AMIGO1,CADM1,CADM3,CCDC141,CDH11,CDH13,CDH19,CDH2,CDH3,CDH5,CDH6,CLSTN2,CLSTN3,CNTN5,DCHS1,DSC3,FAT4,NEXN,OBSL1,PCDH10,PCDH12,PCDH17,PCDH18,PCDH7,PCDH9,PCDHB17,PCDHB18,PCDHB9,PCDHGA10,PCDHGA2,PCDHGA3,PCDHGB2,PCDHGC3,PLXNB3,PTPRM,ROBO1,SDK1,SDK2
GO:BP	organ growth	GO:0035265	3.40758e-09	8.46755	201	1294	42	21354	AKAP6,BNC2,CACNA1C,CAV3,CCM2L,COL14A1,DDR2,ECM1,ESR1,EVC,FBLN5,FGF1,FGF2,FGF7,FGFR1,FGFR2,GJA1,HEY2,HLX,IGF1,KCNK2,LEPR,MEIS1,MYOCD,NOG,PDGFRA,PDGFRB,PI16,PRKG1,RARG,RGS4,RSPO2,SLC25A4,SMO,SORBS2,STC1,TBX2,TGFB2,THBS3,WISP1,WWC2,ZFPM2
GO:BP	cognition	GO:0050890	3.43332e-09	8.46429	335	1294	57	21354	ADCY1,ATP1A2,B4GALT2,BACE1,BRSK1,C5AR1,CACNA1C,CHL1,CNR1,CNTNAP2,CX3CR1,CYP7B1,DBH,ELAVL4,FAM107A,FGF13,FOXP2,GABRB3,GRIA1,GRPR,IGF1,ITGA8,ITGB1,JPH3,JPH4,KCNAB1,KCNK2,LAMB1,LGMN,MAPK8IP2,MAPT,MUSK,NDRG4,NFATC4,NGF,NOG,NPTX2,NTSR1,OPRK1,OPRL1,PLCB1,PRKAR1B,PRKAR2B,PTGS2,PTN,RCAN2,S100B,SHANK3,SHROOM4,SLC2A4,SLC8A2,SNAP25,SOBP,SYT4,TACR1,TACR2,TIFAB
GO:BP	muscle cell proliferation	GO:0033002	4.16491e-09	8.38039	245	1294	47	21354	ADAMTS1,ANGPT1,APLN,APOD,BMP4,C3AR1,CALCRL,CAV1,CDH13,CNN1,EDNRA,ESR1,FGF1,FGF2,FGFR1,FGFR2,GJA1,HEY2,IGF1,IGFBP3,IGFBP5,KCNK2,MEIS1,MMP2,MYOCD,NDRG4,NOG,NOL3,NOS3,NOTCH3,NPR1,P2RY6,PDE1A,PDGFD,PDGFRB,PRKG1,PTGIR,PTGS2,RBPMS2,RGS5,SIX5,TACR1,TBX2,TGFB2,TGFB3,WISP1,ZFPM2
GO:BP	regulation of calcium ion transport into cytosol	GO:0010522	4.47945e-09	8.34878	110	1294	30	21354	ADCYAP1R1,AGTR1A,AKAP6,ANK2,APLNR,BMP4,CACNA1C,CASQ1,CASQ2,CAV1,DMD,EDNRA,F2R,FKBP1B,JPH2,JPH3,NGF,NOL3,NTSR1,P2RY6,PKD2,PLN,PRKD1,RYR2,SLC8A1,SNCA,TGFB2,TRDN,TRPC1,TRPC3
GO:BP	regulation of transmembrane receptor protein serine/threonine kinase signaling pathway	GO:0090092	4.8529e-09	8.314	246	1294	47	21354	9330182L06RIK,ACVRL1,ASPN,BMP4,BMP5,BMPER,CAV1,CAV2,CAV3,CD109,CDH5,CERS1,CHRD,CHRDL1,CIDEA,DAB2,EMILIN1,ENG,FBN1,FSTL1,FSTL3,FZD1,GDF10,GPC3,GREM1,GREM2,HTRA3,ITGA8,LTBP1,MYOCD,NOG,NPNT,PEG10,RBPMS,RBPMS2,RGMA,SFRP1,SPRY1,TGFB1I1,TGFB2,TGFB3,TGFBR3,TWSG1,VASN,WFIKKN2,ZEB1,ZFP423
GO:BP	positive regulation of transporter activity	GO:0032411	4.97298e-09	8.30338	132	1294	33	21354	AKAP6,AMIGO1,ANK2,ASIC2,ATP1B2,BMP4,CACNB2,CACNG4,CASQ1,DMD,GAL,GALR2,HSPA2,HTR3A,HTR3B,JPH2,KCNC2,LRRC55,NTSR1,P2RY6,PIRT,PKD2,PLCB1,PRKG1,RNF207,RYR2,SHANK3,SLC25A4,STAC,SYNGR3,TCAF1,TRDN,TRPC6
GO:BP	response to stimulus	GO:0050896	5.43592e-09	8.26473	10011	1294	728	21354	9330182L06RIK,ABCC9,ABCG4,ACKR1,ACKR3,ACKR4,ACTA2,ACVRL1,ADAM22,ADAMTS18,ADAMTS4,ADAMTS7,ADCY1,ADCY5,ADCYAP1,ADCYAP1R1,ADGRA2,ADGRB2,ADGRE1,ADGRF5,ADGRG3,ADGRG6,ADGRL1,ADGRL3,ADGRL4,ADRA2B,ADRA2C,AFAP1L2,AGTR1A,AHRR,AK4,AKAP12,AKAP6,ALDH1A3,AMIGO1,AMOTL1,ANGPT1,ANGPTL1,ANK1,ANK2,ANXA1,AOAH,AOC3,APBB1,APC2,APH1C,APLN,APLNR,APOD,APOLD1,ARHGAP20,ARHGAP23,ARHGAP44,ARHGAP6,ARHGEF25,ARHGEF9,ARTN,ASIC2,…
GO:BP	regulation of potassium ion transport	GO:0043266	5.78719e-09	8.23753	111	1294	30	21354	ADCYAP1,AKAP6,AMIGO1,ANK2,ATP1B2,CASQ2,CAV1,CAV3,DPP6,FLNA,GAL,GALR2,ITGB1,KCNA5,KCNAB1,KCNC2,KCNE4,KCNG1,KCNH2,KCNIP2,KCNIP4,KCNMB1,LRRC55,NOS1,NOS3,OPRK1,PLCB4,PRKG1,RGS4,RNF207
GO:BP	sprouting angiogenesis	GO:0002040	7.79825e-09	8.108	134	1294	33	21354	ADGRA2,AGTR1A,ANGPT1,ANXA1,APLNR,BMP4,BMPER,CCBE1,CDH13,CLEC14A,EPN2,FGF1,FGF2,FLT4,GATA2,GREM1,ITGB1,KDR,LOXL2,MEOX2,MMRN2,NRP1,PARVA,PTGS2,RAMP2,RECK,RHOJ,ROBO1,RSPO3,SLIT2,SRPX2,TEK,VEGFB
GO:BP	cellular localization	GO:0051641	7.98493e-09	8.09773	2775	1294	254	21354	ADAM22,ADCY1,ADCY5,ADCYAP1R1,AGTR1A,AKAP12,AKAP6,ANGPT1,ANK1,ANK2,AP3B2,APBA1,APLNR,APOD,ARHGAP44,ARHGEF9,ARMCX3,ASTN2,ATP2B4,BACE1,BBS1,BBS7,BC034090,BMP4,BRSK1,BRSK2,BVES,CACNA1B,CACNA1C,CACNA1G,CACNB1,CACNB2,CACNG4,CADPS,CALY,CASQ1,CASQ2,CAV1,CAV2,CAV3,CC2D2A,CCDC141,CDH13,CDH2,CDH3,CDKL5,CFH,CHRM2,CHRNA3,CHRNA5,CLIP3,CNR1,CNTNAP2,COL1A1,COPZ2,CPLX1,CRYAB,DAB2,DCHS1,DENND2A,DLG2,DLG4,DMD,DMTN,…
GO:BP	multicellular organismal signaling	GO:0035637	8.62019e-09	8.06448	142	1294	34	21354	ABCC9,ANK2,CACNA1C,CACNA1G,CACNA1H,CACNB2,CACNG4,CAV1,CTNNA3,DPP6,FKBP1B,FLNA,GJA1,GJA5,GJC1,GJD3,GRIA1,JAM3,KCNA2,KCNA5,KCNC4,KCND2,KCND3,KCNE4,KCNH2,KCNJ5,PLN,RYR2,SCN11A,SCN1B,SCN5A,SCN7A,SLC4A3,SLC8A1
GO:BP	signal release	GO:0023061	8.87961e-09	8.05161	556	1294	78	21354	ADCY1,ADCY5,ADCYAP1,AGTR1A,ANXA1,APBA1,APLN,BACE1,BRSK1,BRSK2,C1QTNF3,CACNA1B,CACNA1C,CACNB2,CADPS,CHRM2,CHRNA3,CHRNA5,CNR1,CPLX1,CXCL12,DOC2B,EFNA5,ENHO,F2R,FGFR1,FKBP1B,GABBR1,GAL,GJA1,GJA5,GPR27,IGFBP3,ILDR2,IRS1,KCNA2,KCNB1,KCNC4,LEPR,LIN7B,LTBP4,NAPB,NCS1,NELL2,NGF,NLGN2,NOS1,NPY1R,NPY2R,OPRK1,PFKM,PPP1R9A,PTGES,PTPRN,RAB11FIP5,RASL10B,RIMS3,RPH3A,SFRP1,SLC16A2,SLC18A2,SNAP25,SNCA,SNCAIP,SV2…
GO:BP	negative regulation of cell differentiation	GO:0045596	9.29219e-09	8.03188	777	1294	98	21354	ACVRL1,ADAMTS7,ADCYAP1,ANXA1,APBB1,BMP4,CAV1,CAV3,CHADL,CHRD,CMTM5,COL5A1,COL5A2,CXCL14,DAAM2,DACT3,DMD,DMTN,EDNRB,EFEMP1,EFNA5,EPHA7,FBN1,FERMT2,FGFR1,FRZB,FSTL3,GATA2,GDF10,GLI2,GLI3,GPR37L1,GRB14,GREM1,HAND2,HLX,HOXA5,HOXA7,HSPB1,ID4,IGF1,IGFBP5,ITGB1,KANK1,LRP3,LTBP3,MEIS1,MMP11,MYOCD,NFATC4,NKX3-2,NOG,NOTCH3,NPR2,NRP1,NTN1,OSR1,PHOX2B,PI16,POSTN,PRDM6,PRICKLE1,PTN,PTPRS,RARG,RBPMS2,RGMA,RGS4…
GO:BP	adenylate cyclase-modulating G protein-coupled receptor signaling pathway	GO:0007188	1.02673e-08	7.98854	216	1294	43	21354	ADCY1,ADCY5,ADCYAP1,ADCYAP1R1,ADGRB2,ADGRE1,ADGRG3,ADGRG6,ADGRL1,ADGRL3,ADGRL4,ADRA2C,AKAP12,ATP2B4,CALCRL,CHRM2,CNR1,EDNRA,FLNA,GABBR1,GALR2,GCGR,GLP2R,GNAI1,GNAO1,GPR161,GPR37,GPR37L1,GPR4,GRIK3,MRAP2,NOS1,NPY2R,OPRK1,OPRL1,PLN,PTGER1,PTGFR,PTGIR,PTH1R,RAMP2,RIT2,SSTR4
GO:BP	regulation of endothelial cell migration	GO:0010594	1.13489e-08	7.94505	183	1294	39	21354	ACVRL1,ADGRA2,AMOTL1,ANGPT1,ANXA1,ATOH8,ATP2B4,BMP4,BMPER,CCBE1,DCN,FGF1,FGF18,FGF2,FGFR1,FLT4,GATA2,HSPB1,IGF1,KDR,LGMN,MEOX2,MMRN2,NOS3,NR2F2,NRP1,PLPP3,PRKD1,PTGS2,PTN,PTPRM,RHOJ,SLIT2,SNAI2,SPARC,SRPX2,STC1,TEK,VASH1
GO:BP	sensory system development	GO:0048880	1.20208e-08	7.92007	404	1294	63	21354	ACVRL1,ADAMTS18,ALDH1A3,ARHGEF15,ATP2B4,BBS7,BMP4,CACNA1C,CC2D2A,CELF4,CFH,CHRDL1,CNGA3,COL5A1,COL5A2,COL8A1,COL8A2,CRYAB,CYP1B1,EFEMP1,FBN1,FGF2,FJX1,FOXF2,FOXP2,FREM2,GAS1,GJA1,GLI3,HPCA,LAMA1,LAMB2,LAMC3,MAB21L1,MAB21L2,MEIS1,MFAP2,MYH10,MYOM1,NES,NRP1,OBSL1,PBX3,PDGFRA,PDGFRB,PHOX2B,PTN,PTPRM,RARG,RHOJ,SDK1,SDK2,SIX5,SPRY1,TBX2,TGFB2,TMEM132E,TMOD1,TUB,TWIST1,TWSG1,UNC45B,ZEB1
GO:BP	cellular chemical homeostasis	GO:0055082	1.50676e-08	7.82196	864	1294	105	21354	ACKR3,ACKR4,ADCY5,ADCYAP1,ADCYAP1R1,AGTR1A,AKAP6,ANK2,APLNR,ATP1A2,ATP1B2,ATP2B3,ATP2B4,BDKRB2,BMP4,BRSK2,C1QTNF3,C3AR1,C5AR1,C7,CACNA1C,CACNA1G,CACNB2,CALB2,CASQ1,CASQ2,CAV1,CAV2,CAV3,CDH5,CNR1,CX3CR1,DLG4,DMD,DMPK,EDNRA,EDNRB,EFNA5,EPOR,ESR1,F2R,FAM155A,FGF2,FKBP1B,FXYD1,FZD2,GALR2,GATA2,GJA1,GPR20,GPR27,GPR4,GRIA1,IGF1,JPH2,JPH3,KCNA5,KCNB1,KCNK3,KCTD17,LEPR,MICU3,NCS1,NGF,NOL3,NOS1,NPY1R,NPY2…
GO:BP	cyclic-nucleotide-mediated signaling	GO:0019935	1.66218e-08	7.77932	219	1294	43	21354	ADCY1,ADCY5,ADCYAP1,ADCYAP1R1,ADGRB2,ADGRE1,ADGRG3,ADGRG6,ADGRL1,ADGRL3,ADGRL4,ADRA2C,APLNR,ATP2B4,CALCRL,CNR1,EDNRB,GAL,GALR2,GCGR,GNAI1,GPR161,GPR4,KCNC2,MRAP2,MRVI1,NOS1,NPR1,NPR2,NPY2R,OPRL1,PDE7B,PLN,PRKAR1B,PRKAR2B,PRKG1,PTGER1,PTGFR,PTGIR,PTH1R,RAMP2,RIT2,SSTR4
GO:BP	regulation of synapse organization	GO:0050807	1.83199e-08	7.73708	246	1294	46	21354	ADGRB2,ADGRL1,ADGRL3,AMIGO1,ARHGAP44,ARHGEF15,ASIC2,CBLN2,CDH2,CDKL5,CLSTN2,CLSTN3,CTNNA2,DGKB,DMPK,EFNA5,EPHA7,FLRT2,FZD1,GPC6,KIF1A,LRFN1,LRRC4B,LRRN3,LRRTM1,MUSK,MYH10,NFATC4,NLGN2,NRP2,NTN1,PPP1R9A,PTN,PTPRS,RIMS3,SEMA3F,SHANK3,SLITRK3,SLITRK5,SNCA,SPARC,SRPX2,SYNDIG1,TANC2,THBS2,ZFP804A
GO:BP	learning or memory	GO:0007611	1.85194e-08	7.73237	301	1294	52	21354	ADCY1,ATP1A2,B4GALT2,BACE1,BRSK1,CACNA1C,CNR1,CNTNAP2,CX3CR1,CYP7B1,DBH,ELAVL4,FGF13,FOXP2,GABRB3,GRIA1,GRPR,IGF1,ITGA8,ITGB1,JPH3,JPH4,KCNAB1,KCNK2,LAMB1,LGMN,MAPK8IP2,MAPT,MUSK,NDRG4,NFATC4,NGF,NOG,NPTX2,NTSR1,OPRK1,OPRL1,PLCB1,PRKAR1B,PRKAR2B,PTGS2,PTN,RCAN2,S100B,SHANK3,SLC2A4,SLC8A2,SNAP25,SYT4,TACR1,TACR2,TIFAB
GO:BP	cardiac muscle cell action potential	GO:0086001	2.63006e-08	7.58003	64	1294	22	21354	ANK2,CACNA1C,CACNA1G,CACNB2,CAV1,CAV3,CTNNA3,DMD,FGF13,FLNA,GJA5,KCNA5,KCND2,KCND3,KCNE4,KCNH2,KCNJ5,KCNJ8,RNF207,RYR2,SCN1B,SCN5A
GO:BP	regulation of nervous system development	GO:0051960	2.72491e-08	7.56465	515	1294	73	21354	9330182L06RIK,ADCYAP1,ADGRB2,ADGRL1,ADGRL3,AMIGO1,ASIC2,BMP4,CBLN2,CDH2,CDKL5,CHODL,CLSTN2,CLSTN3,CX3CR1,CXCL12,DAAM2,EFNA5,EPHA7,FLRT2,FN1,GFAP,GJC2,GLI3,GPR37L1,HEY2,HGF,ID4,IGF1,JAM2,LGI4,LRRC4B,LRRN3,LRRTM1,MAP1B,MAPT,MUSK,NEFL,NFATC4,NGF,NLGN2,NOG,NOS1,NRP1,NTN1,NUMBL,OBSL1,PLXNA4,PLXNB3,PTN,PTPRS,RARG,RGMA,ROBO1,S100B,SEMA3A,SEMA3F,SEMA3G,SERPINE2,SHANK3,SLIT2,SLITRK3,SLITRK5,SMO,SOX10,SRPX…
GO:BP	positive regulation of ion transmembrane transporter activity	GO:0032414	2.92047e-08	7.53455	125	1294	31	21354	AKAP6,AMIGO1,ANK2,ASIC2,ATP1B2,BMP4,CACNB2,CACNG4,CASQ1,DMD,GAL,GALR2,HSPA2,HTR3A,HTR3B,JPH2,KCNC2,LRRC55,NTSR1,P2RY6,PIRT,PKD2,PLCB1,PRKG1,RNF207,RYR2,SHANK3,STAC,TCAF1,TRDN,TRPC6
GO:BP	cellular response to transforming growth factor beta stimulus	GO:0071560	3.20969e-08	7.49354	232	1294	44	21354	ACVRL1,ASPN,CAV1,CAV2,CAV3,CD109,CDH5,CIDEA,CLEC3B,COL1A1,COL1A2,COL3A1,CX3CR1,DAB2,EMILIN1,ENG,FBN1,FERMT2,FGFR2,GDNF,HTRA3,ITGA8,LRRC32,LTBP1,LTBP3,LTBP4,MYOCD,NOS3,NPNT,PDGFD,PEG10,PENK,POSTN,SFRP1,SMAD9,SPRY1,TGFB1I1,TGFB2,TGFB3,TGFBR3,TWSG1,VASN,WFIKKN2,ZEB1
GO:BP	respiratory system development	GO:0060541	3.7806e-08	7.42244	242	1294	45	21354	ALDH1A3,BMP4,CCBE1,CRISPLD2,CTGF,EDA,EIF4EBP1,FGF1,FGF18,FGF2,FGF7,FGFR1,FLT4,FOXF1,FOXP2,FSTL3,GLI2,GLI3,GNG8,GPC3,HHIP,HOXA5,IGF1,IGFBP5,KCNAB1,LAMA1,LTBP3,MYOCD,NOG,NOS3,PDGFRA,PDGFRB,PHOX2B,PTK7,PTN,RARG,RCN3,RSPO2,SPARC,SPEG,SPRY1,TCF21,TNC,WNT2B,ZFPM2
GO:BP	cytosolic calcium ion transport	GO:0060401	3.85891e-08	7.41353	190	1294	39	21354	ADCYAP1R1,AGTR1A,AKAP6,ANK2,APLNR,ATP2B3,BMP4,CACNA1C,CACNA1G,CASQ1,CASQ2,CAV1,CTGF,DMD,EDNRA,F2R,FAM155A,FGF2,FKBP1B,JPH2,JPH3,MICU3,NGF,NOL3,NTSR1,P2RY6,PKD2,PLN,PRKD1,RYR2,SLC25A23,SLC8A1,SLC8A2,SNCA,TGFB2,TRDN,TRPC1,TRPC3,XCR1
GO:BP	positive regulation of synaptic transmission	GO:0050806	3.85891e-08	7.41353	190	1294	39	21354	ADCY1,ADCYAP1,CACNA1B,CACNB2,CACNG4,CALB2,CLSTN2,CLSTN3,CNR1,CX3CR1,DLG4,FAM107A,GFAP,GRIA1,GRIA4,LAMA2,LGMN,LRRTM1,MPP2,MUSK,NCS1,NFATC4,NLGN2,NOS1,NSG1,PPP1R9A,PTGS2,PTN,RIMS3,ROR2,S100B,SERPINE2,SHANK3,SLC8A2,SNAP25,SNCA,SYT1,TACR1,TACR2
GO:BP	regulation of release of sequestered calcium ion into cytosol	GO:0051279	3.89482e-08	7.40951	84	1294	25	21354	AKAP6,ANK2,APLNR,CACNA1C,CASQ1,CASQ2,DMD,EDNRA,F2R,FKBP1B,JPH2,JPH3,NGF,NOL3,NTSR1,P2RY6,PKD2,PLN,PRKD1,RYR2,SLC8A1,SNCA,TGFB2,TRDN,TRPC1
GO:BP	regulation of cell-substrate adhesion	GO:0010810	4.06935e-08	7.39048	216	1294	42	21354	ACVRL1,APOD,ARHGAP6,CDH13,COL16A1,COL1A1,COL8A1,DLC1,DMD,DMTN,ECM2,EDIL3,EFNA5,EGFLAM,EMILIN1,FAM107A,FBLN2,FERMT2,FLNA,FN1,FOXF1,GREM1,HAS2,HOXA7,ITGB1,KANK1,KDR,LIMCH1,LIMS2,NID1,NPNT,NPY2R,NRP1,PHLDB2,PLAU,POSTN,PTN,SPOCK1,SPOCK2,SPRY4,TEK,VTN
GO:BP	G protein-coupled receptor signaling pathway, coupled to cyclic nucleotide second messenger	GO:0007187	4.3734e-08	7.35918	243	1294	45	21354	ADCY1,ADCY5,ADCYAP1,ADCYAP1R1,ADGRB2,ADGRE1,ADGRG3,ADGRG6,ADGRL1,ADGRL3,ADGRL4,ADRA2C,AKAP12,ANXA1,ATP2B4,CALCRL,CHRM2,CNR1,EDNRA,FLNA,FZD2,GABBR1,GALR2,GCGR,GLP2R,GNAI1,GNAO1,GPR161,GPR37,GPR37L1,GPR4,GRIK3,MRAP2,NOS1,NPY2R,OPRK1,OPRL1,PLN,PTGER1,PTGFR,PTGIR,PTH1R,RAMP2,RIT2,SSTR4
GO:BP	eye development	GO:0001654	4.46995e-08	7.3497	396	1294	61	21354	ACVRL1,ADAMTS18,ALDH1A3,ARHGEF15,ATP2B4,BBS7,BMP4,CACNA1C,CC2D2A,CELF4,CFH,CHRDL1,CNGA3,COL5A1,COL5A2,COL8A1,COL8A2,CRYAB,CYP1B1,EFEMP1,FBN1,FGF2,FJX1,FOXF2,FOXP2,FREM2,GAS1,GJA1,GLI3,HPCA,LAMA1,LAMB2,LAMC3,MAB21L1,MAB21L2,MEIS1,MFAP2,MYH10,MYOM1,NES,NRP1,OBSL1,PBX3,PDGFRA,PDGFRB,PTN,PTPRM,RARG,RHOJ,SDK1,SDK2,SIX5,SPRY1,TBX2,TGFB2,TMOD1,TUB,TWIST1,TWSG1,UNC45B,ZEB1
GO:BP	negative regulation of cartilage development	GO:0061037	4.85014e-08	7.31425	29	1294	15	21354	ADAMTS7,BMP4,CHADL,EFEMP1,FRZB,GLI2,GREM1,LTBP3,NKX3-2,NOG,RARG,SNAI2,TGFB2,WISP1,WNT9A
GO:BP	cardiac chamber development	GO:0003205	5.14985e-08	7.28821	175	1294	37	21354	ADAMTS1,ADGRG6,BMP4,BMP5,CAV3,CCM2L,ENG,EPOR,FOXF1,FZD1,FZD2,GJA5,HAND1,HAND2,HEY2,KCNK2,LTBP1,MYH10,MYOCD,NOG,NOS3,NPY2R,NRP1,NRP2,PARVA,PTK7,RYR2,SCN5A,SLIT2,SLIT3,SMO,TBX2,TEK,TGFB2,TNNT2,TPM1,ZFPM2
GO:BP	response to transforming growth factor beta	GO:0071559	5.81758e-08	7.23526	236	1294	44	21354	ACVRL1,ASPN,CAV1,CAV2,CAV3,CD109,CDH5,CIDEA,CLEC3B,COL1A1,COL1A2,COL3A1,CX3CR1,DAB2,EMILIN1,ENG,FBN1,FERMT2,FGFR2,GDNF,HTRA3,ITGA8,LRRC32,LTBP1,LTBP3,LTBP4,MYOCD,NOS3,NPNT,PDGFD,PEG10,PENK,POSTN,SFRP1,SMAD9,SPRY1,TGFB1I1,TGFB2,TGFB3,TGFBR3,TWSG1,VASN,WFIKKN2,ZEB1
GO:BP	embryonic organ development	GO:0048568	5.89598e-08	7.22944	481	1294	69	21354	ALDH1A3,BMP4,BMP5,CC2D2A,EFEMP1,ENG,EPN2,FBN1,FGFR1,FGFR2,FOXF1,FOXF2,FRZB,FZD2,GAS1,GATA2,GDNF,GJA1,GJA5,GLI2,GLI3,HAND1,HAND2,HEY2,HLX,HOXA5,HOXA7,HOXB2,HOXC4,HOXC9,ITGA8,KCNQ4,LHFPL5,LRIG1,MFAP2,MMP16,NES,NKX3-2,NOG,NR2F2,NTN1,OSR1,PBX3,PCDH12,PDGFRA,PDGFRB,PKD2,PTK7,RARG,RBPMS2,ROR2,RSPO3,RYR2,SALL1,SMO,SNAI1,SOBP,SOX17,SOX18,TBX2,TCF21,TGFB2,TGFB3,TIFAB,TWIST1,VASH1,WNT9A,ZEB1,ZFPM2
GO:BP	vascular endothelial growth factor receptor signaling pathway	GO:0048010	5.906e-08	7.22871	49	1294	19	21354	ANGPT1,BMP4,CADM4,CLEC14A,EMILIN1,EPN2,FGF18,FLT1,FLT4,GRB10,HSPB1,KDR,MMRN2,MYOF,NRP1,PRKD1,TEK,TMEM204,VEGFB
GO:BP	cardiac muscle cell action potential involved in contraction	GO:0086002	5.906e-08	7.22871	49	1294	19	21354	ANK2,CACNA1C,CACNA1G,CACNB2,CAV1,CAV3,CTNNA3,FLNA,GJA5,KCNA5,KCND3,KCNE4,KCNH2,KCNJ5,KCNJ8,RNF207,RYR2,SCN1B,SCN5A
GO:BP	actin cytoskeleton organization	GO:0030036	6.09617e-08	7.21494	711	1294	90	21354	ABLIM2,ABLIM3,AMOTL1,ANTXR1,ANXA1,ARHGAP44,ARHGAP6,ARHGEF15,ARHGEF17,BRSK2,CALD1,CAP2,CASQ1,CASQ2,CAV3,CDC42EP3,CFL2,CNN1,CSRP1,CTGF,CTNNA2,DAAM2,DLC1,DMTN,EFNA5,EFS,EHD2,ENAH,FAM107A,FERMT2,FGD1,FGF7,FHOD3,FLNA,FMN2,FRMD6,GAS2L2,HIP1,INA,ITGB1,JAM3,JMY,KANK1,KANK2,KANK4,KIRREL,LIMCH1,LMOD1,LURAP1,MYH10,NRP1,PAM,PARVA,PARVB,PDGFRA,PDGFRB,PDLIM3,PDLIM4,PDLIM7,PGM5,PHACTR1,PHACTR2,PHLDB2,PLEKHH2,PL…
GO:BP	visual system development	GO:0150063	6.16635e-08	7.20997	399	1294	61	21354	ACVRL1,ADAMTS18,ALDH1A3,ARHGEF15,ATP2B4,BBS7,BMP4,CACNA1C,CC2D2A,CELF4,CFH,CHRDL1,CNGA3,COL5A1,COL5A2,COL8A1,COL8A2,CRYAB,CYP1B1,EFEMP1,FBN1,FGF2,FJX1,FOXF2,FOXP2,FREM2,GAS1,GJA1,GLI3,HPCA,LAMA1,LAMB2,LAMC3,MAB21L1,MAB21L2,MEIS1,MFAP2,MYH10,MYOM1,NES,NRP1,OBSL1,PBX3,PDGFRA,PDGFRB,PTN,PTPRM,RARG,RHOJ,SDK1,SDK2,SIX5,SPRY1,TBX2,TGFB2,TMOD1,TUB,TWIST1,TWSG1,UNC45B,ZEB1
GO:BP	sensory perception of pain	GO:0019233	6.43696e-08	7.19132	144	1294	33	21354	ADCYAP1,ADRA2C,BACE1,CACNA1B,CNR1,CXCL12,DLG2,EDNRA,EDNRB,F2R,FGFR1,KCNA2,KCNC4,KCND2,KCNJ10,MGLL,NDN,NGF,NLGN2,NOS1,NPY1R,NPY2R,NTSR1,OPRK1,OPRL1,PENK,PHF24,PTGES,PTGS2,SCN11A,TACR1,TMEM100,UCHL1
GO:BP	regulation of phosphorylation	GO:0042325	6.44629e-08	7.19069	1374	1294	145	21354	ACVRL1,ADARB1,ADCYAP1,ADRA2B,ADRA2C,AFAP1L2,AGTR1A,AK4,AKAP6,ANGPT1,APLN,APLNR,ATP2B4,AXL,BDKRB2,BMP4,BMP5,BMPER,C1QTNF2,C1QTNF9,C5AR1,CADM4,CAV1,CAV2,CAV3,CD109,CDH5,CERS1,CHRNA3,CLIP3,CNTN1,CSPG4,CTGF,CX3CR1,DAB2,DDR2,DLG4,DMD,DMTN,EDNRA,EDNRB,EEF1A2,EFNA5,EMILIN1,ENG,EPHA7,F2R,FAM129A,FAM212B,FBN1,FERMT2,FGF1,FGF13,FGF18,FGF2,FGF7,FGFR1,FLT1,FLT4,FN1,FNDC1,FZD1,GDF10,GDNF,GFRA1,GJC2,GPRC5B,GRB…
GO:BP	regulation of angiogenesis	GO:0045765	7.03138e-08	7.15296	302	1294	51	21354	ACVRL1,ADAMTS1,ADGRA2,ADGRB2,APLNR,ATP2B4,BMPER,C3AR1,C5AR1,C6,CCBE1,CDH5,CX3CR1,CYP1B1,DCN,ECM1,EMILIN1,ENG,EPN2,F3,FBLN5,FGF1,FGF18,FGF2,FLT1,GATA2,GPR4,GREM1,HGF,HHIP,HOXA5,HSPB1,HSPB6,ITGB1,KDR,NOS3,NRP1,PRKD1,PTGIS,PTN,PTPRM,RAMP2,RECK,RHOJ,SPARC,TEK,TGFB2,THBS2,TIE1,VASH1,VEGFB
GO:BP	regulation of heart rate	GO:0002027	7.47757e-08	7.12624	100	1294	27	21354	ANK2,BVES,CACNA1C,CACNA1G,CACNB2,CASQ2,CAV1,CAV3,CTNNA3,DMD,FKBP1B,GJA5,HEY2,KCNA5,KCND3,KCNE4,KCNH2,KCNJ5,PLN,POPDC2,RGS4,RYR2,SCN1B,SCN5A,SEMA3A,TACR3,TPM1
GO:BP	axon guidance	GO:0007411	8.99563e-08	7.04597	239	1294	44	21354	APBB1,ARTN,BOC,CCDC141,CHL1,CHN1,CNTN5,CXCL12,EFNA5,ENAH,EPHA7,ETV1,FLRT2,GAP43,GAS1,GDNF,GLI2,GLI3,KIF5A,KIF5C,LAMA1,LAMA2,LAMB2,MYH10,NEXN,NOG,NOTCH3,NRP1,NRP2,NTN1,PLXNA4,PLXNB3,PTPRM,ROBO1,ROBO2,SCN1B,SEMA3A,SEMA3F,SEMA3G,SLIT2,SLIT3,SMO,TGFB2,TUBB3
GO:BP	nephron development	GO:0072006	9.63752e-08	7.01603	154	1294	34	21354	ACTA2,AGTR1A,ANGPT1,BMP4,C3AR1,CFH,DCHS1,FAT4,FGF1,FGF2,GDNF,GLI3,GPC3,GPR4,GREM1,KIF26B,LAMB2,MAGED1,NID1,NOG,NOTCH3,NPNT,OSR1,PDGFD,PDGFRA,PDGFRB,PKD2,PODXL,SALL1,SMO,TCF21,TEK,WNT2B,WWTR1
GO:BP	regulation of synapse structure or activity	GO:0050803	1.00704e-07	6.99695	258	1294	46	21354	ADGRB2,ADGRL1,ADGRL3,AMIGO1,ARHGAP44,ARHGEF15,ASIC2,CBLN2,CDH2,CDKL5,CLSTN2,CLSTN3,CTNNA2,DGKB,DMPK,EFNA5,EPHA7,FLRT2,FZD1,GPC6,KIF1A,LRFN1,LRRC4B,LRRN3,LRRTM1,MUSK,MYH10,NFATC4,NLGN2,NRP2,NTN1,PPP1R9A,PTN,PTPRS,RIMS3,SEMA3F,SHANK3,SLITRK3,SLITRK5,SNCA,SPARC,SRPX2,SYNDIG1,TANC2,THBS2,ZFP804A
GO:BP	embryonic organ morphogenesis	GO:0048562	1.07293e-07	6.96943	315	1294	52	21354	ALDH1A3,BMP4,EFEMP1,ENG,FBN1,FGFR1,FGFR2,FOXF1,FOXF2,FRZB,FZD2,GAS1,GATA2,GJA1,GLI2,GLI3,HAND1,HAND2,HLX,HOXA5,HOXA7,HOXB2,HOXC4,HOXC9,ITGA8,KCNQ4,LHFPL5,LRIG1,MFAP2,MMP16,NKX3-2,NOG,NTN1,OSR1,PDGFRA,PKD2,PTK7,RARG,RBPMS2,ROR2,RYR2,SMO,SOBP,SOX17,TBX2,TCF21,TGFB2,TGFB3,TIFAB,TWIST1,WNT9A,ZEB1
GO:BP	regulation of actin filament-based movement	GO:1903115	1.07443e-07	6.96882	45	1294	18	21354	ACTA2,AKAP6,ANK2,ATP1A2,CACNA1C,CASQ2,CAV1,CAV3,CTNNA3,FGF13,FXYD1,GJA5,NOS1,PLN,RYR2,SCN5A,STC1,TNNT2
GO:BP	membrane repolarization	GO:0086009	1.07443e-07	6.96882	45	1294	18	21354	AKAP6,ATP1B2,CASQ2,CAV1,CAV3,FLNA,GJA1,GJA5,KCNA5,KCND3,KCNE4,KCNH2,KCNIP2,KCNJ5,KCNJ8,RNF207,SCN1B,SCN5A
GO:BP	cell growth	GO:0016049	1.07904e-07	6.96696	498	1294	70	21354	ACVRL1,AKAP6,APBB1,CADM1,CAV3,CDKL5,CLSTN3,COL14A1,CRYAB,CXCL12,DACT3,DCBLD2,EFNA5,EPHA7,FAM107A,FBLN5,FLT4,FN1,FRZB,GAS1,GJA1,GREM1,IGF1,IGFBP3,IGFBP4,IGFBP5,IGFBP7,ITGB1,KAZALD1,KRT17,LAMB2,MAP1B,MAPT,MGLL,MYOCD,NDN,NGF,NRP1,NRP2,NTN1,OLFM1,P3H1,PI16,PLXNA4,POSTN,PRKG1,PTPRS,RARG,RERG,RGMA,RGS4,SEMA3A,SEMA3F,SEMA3G,SERPINE2,SFRP1,SLC25A4,SLIT2,SLIT3,SMO,SORBS2,SOX17,SYT1,SYT17,SYT4,TGFB2,TRO,TT…
GO:BP	cell communication involved in cardiac conduction	GO:0086065	1.17553e-07	6.92977	40	1294	17	21354	ANK2,CACNA1C,CACNA1G,CACNB2,CAV1,CTNNA3,FLNA,GJA1,GJA5,GJC1,GJD3,KCNA5,KCNJ5,RYR2,SCN1B,SCN5A,SLC8A1
GO:BP	collagen metabolic process	GO:0032963	1.17813e-07	6.92881	109	1294	28	21354	BMP4,COL1A1,COL1A2,COL5A1,CTGF,CYGB,EMILIN1,ENG,F2R,FN1,ITGB1,LARP6,LTBP1,MFAP4,MMP11,MMP16,MMP17,MMP19,MMP2,MRC2,P3H1,P3H2,P3H3,PDGFRB,RCN3,SERPINH1,TGFB3,TNXB
GO:BP	neuron projection guidance	GO:0097485	1.19723e-07	6.92182	241	1294	44	21354	APBB1,ARTN,BOC,CCDC141,CHL1,CHN1,CNTN5,CXCL12,EFNA5,ENAH,EPHA7,ETV1,FLRT2,GAP43,GAS1,GDNF,GLI2,GLI3,KIF5A,KIF5C,LAMA1,LAMA2,LAMB2,MYH10,NEXN,NOG,NOTCH3,NRP1,NRP2,NTN1,PLXNA4,PLXNB3,PTPRM,ROBO1,ROBO2,SCN1B,SEMA3A,SEMA3F,SEMA3G,SLIT2,SLIT3,SMO,TGFB2,TUBB3
GO:BP	hindbrain development	GO:0030902	1.22911e-07	6.91041	180	1294	37	21354	ATP1B2,B4GALT2,BMP5,C5AR1,CNTN1,CTNNA2,FAIM2,FGF2,FLNA,FOXP2,GABRB3,GAS1,GATA2,GLI2,GPR37L1,HOXB2,IGF1,ITGB1,MYH10,NOG,PHOX2A,PHOX2B,PTBP2,PTN,PTPRS,RBFOX2,RORA,SERPINE2,SEZ6,SEZ6L,SMAD9,SMO,SSTR1,TRNP1,WLS,ZFP365,ZFP423
GO:BP	regulation of vasculature development	GO:1901342	1.30598e-07	6.88406	307	1294	51	21354	ACVRL1,ADAMTS1,ADGRA2,ADGRB2,APLNR,ATP2B4,BMPER,C3AR1,C5AR1,C6,CCBE1,CDH5,CX3CR1,CYP1B1,DCN,ECM1,EMILIN1,ENG,EPN2,F3,FBLN5,FGF1,FGF18,FGF2,FLT1,GATA2,GPR4,GREM1,HGF,HHIP,HOXA5,HSPB1,HSPB6,ITGB1,KDR,NOS3,NRP1,PRKD1,PTGIS,PTN,PTPRM,RAMP2,RECK,RHOJ,SPARC,TEK,TGFB2,THBS2,TIE1,VASH1,VEGFB
GO:BP	cardiac chamber morphogenesis	GO:0003206	1.32464e-07	6.8779	132	1294	31	21354	ADAMTS1,ADGRG6,BMP4,BMP5,CAV3,CCM2L,ENG,EPOR,FOXF1,FZD1,FZD2,GJA5,HAND1,HAND2,HEY2,NOG,NOS3,NPY2R,NRP1,NRP2,PARVA,RYR2,SLIT2,SLIT3,SMO,TBX2,TEK,TGFB2,TNNT2,TPM1,ZFPM2
GO:BP	positive regulation of response to stimulus	GO:0048584	1.52786e-07	6.81592	2206	1294	207	21354	9330182L06RIK,ACKR3,ACTA2,ACVRL1,ADCYAP1,ADCYAP1R1,ADGRA2,ADRA2B,ADRA2C,AFAP1L2,AGTR1A,AKAP12,AKAP6,ALDH1A3,ANGPT1,ANXA1,AOC3,APBB1,ARTN,AXL,BMP4,BMP5,BMPER,C1QTNF2,C1QTNF3,C1QTNF9,C1RA,C1RL,C1S1,C3AR1,C5AR1,C6,C7,CADM1,CAV1,CAV2,CCBE1,CDH13,CDH2,CDH3,CDH5,CERS1,CFH,CNR1,COL1A1,COL3A1,CSPG4,CTGF,CX3CR1,CXCL12,CXCL14,CYP1B1,DAAM2,DAB2,DACT1,DCN,DKK2,DLG4,DMTN,DYSF,EDA,EDAR,EDNRA,ENG,ENHO,EPN2,EPOR…
GO:BP	regulation of actin filament-based process	GO:0032970	1.53894e-07	6.81278	418	1294	62	21354	ACTA2,AKAP6,ANK2,ARHGAP44,ARHGAP6,ARHGEF15,ATP1A2,CACNA1C,CASQ2,CAV1,CAV3,CDC42EP3,CFL2,CTGF,CTNNA2,CTNNA3,DLC1,DMTN,EFNA5,FAM107A,FERMT2,FGF13,FHOD3,FLNA,FMN2,FRMD6,FXYD1,GJA5,JAM3,JMY,KANK1,KANK2,KANK4,KIRREL,LIMCH1,LMOD1,NOS1,NRP1,PAM,PDGFRB,PDLIM4,PHLDB2,PLEKHH2,PLN,PPM1E,PPP1R9A,RGS4,RYR2,SCN5A,SHANK3,SLIT2,SORBS3,STC1,SYNPO2,TACR1,TEK,TGFB2,TGFB3,TMOD1,TNNT2,TPM1,WASF3
GO:BP	regulation of secretion by cell	GO:1903530	1.64679e-07	6.78336	645	1294	83	21354	ADCY1,ADCY5,ADCYAP1,AGTR1A,ANXA1,APBA1,APBB1,APLN,BACE1,BRSK2,C1QTNF3,CACNA1B,CACNA1G,CACNB2,CADPS,CD200,CHRM2,CHRNA3,CHRNA5,CNR1,CPLX1,CXCL12,DOC2B,EFNA5,ENHO,F2R,FGFR1,FKBP1B,FOXF1,FRMD4A,GABBR1,GAL,GATA2,GJA1,GJA5,GPR27,IGF1,IGFBP3,IRS1,KCNA2,KCNB1,KCNC4,LEPR,MYH10,MYOM1,NCS1,NELL2,NGF,NLGN2,NOS1,NPY1R,NPY2R,NTSR1,OPRK1,P3H1,PAM,PFKM,PPP1R9A,PRKG1,PTGES,RAB11FIP5,RAB12,RAB3B,RAB3C,RASL10B,RIMS…
GO:BP	smooth muscle cell proliferation	GO:0048659	1.84798e-07	6.7333	174	1294	36	21354	ADAMTS1,APLN,APOD,BMP4,C3AR1,CALCRL,CAV1,CDH13,CNN1,EDNRA,ESR1,FGF2,FGFR2,GJA1,IGF1,IGFBP3,IGFBP5,MMP2,MYOCD,NDRG4,NOL3,NOS3,NOTCH3,NPR1,P2RY6,PDE1A,PDGFD,PDGFRB,PRKG1,PTGIR,PTGS2,RBPMS2,RGS5,TACR1,TGFB3,WISP1
GO:BP	endothelial cell proliferation	GO:0001935	2.0655e-07	6.68498	150	1294	33	21354	ACVRL1,AGTR1A,APLN,APLNR,ATOH8,BMP4,BMPER,CAV1,CAV2,CDH13,CXCL12,DYSF,ECM1,ENG,F3,FGF2,FGFR1,FLT1,FLT4,GATA2,GJA1,IGF1,KDR,LOXL2,NR2F2,PLXNB3,PRKD1,PTPRM,SCG2,SPARC,TEK,VASH1,VEGFB
GO:BP	regulation of protein phosphorylation	GO:0001932	2.08345e-07	6.68122	1220	1294	131	21354	ACVRL1,ADARB1,ADCYAP1,ADRA2B,ADRA2C,AFAP1L2,AGTR1A,AKAP6,ANGPT1,APLNR,ATP2B4,BDKRB2,BMP4,BMP5,BMPER,C1QTNF2,C1QTNF9,C5AR1,CADM4,CAV1,CAV2,CAV3,CD109,CDH5,CERS1,CHRNA3,CLIP3,CNTN1,CSPG4,CTGF,CX3CR1,DAB2,DDR2,DLG4,DMD,DMTN,EDNRA,EDNRB,EFNA5,EMILIN1,ENG,EPHA7,F2R,FAM129A,FAM212B,FBN1,FERMT2,FGF1,FGF13,FGF18,FGF2,FGF7,FGFR1,FLT1,FLT4,FN1,FNDC1,FZD1,GDF10,GDNF,GFRA1,GJC2,GPRC5B,GREM1,HGF,HSPA2,HSPB1,I…
GO:BP	regulation of epithelial cell migration	GO:0010632	2.09747e-07	6.6783	245	1294	44	21354	ACVRL1,ADGRA2,AMOTL1,ANGPT1,ANXA1,ATOH8,ATP2B4,BMP4,BMPER,CCBE1,DCN,FGF1,FGF18,FGF2,FGF7,FGFR1,FLT4,GATA2,HAS2,HSPB1,IGF1,KDR,LGMN,MEOX2,MMRN2,NOS3,NR2F2,NRP1,PLPP3,PRKD1,PTGS2,PTN,PTPRM,RHOJ,SEMA3A,SLIT2,SNAI2,SPARC,SRPX2,STC1,TACR1,TEK,TGFB2,VASH1
GO:BP	striated muscle cell differentiation	GO:0051146	2.1183e-07	6.67401	311	1294	51	21354	AKAP6,AW551984,BMP4,BVES,CASQ1,CASQ2,CAV2,CAV3,CDH2,CFL2,COL14A1,CSRP1,CXCL12,DMD,DMPK,DNER,DYSF,EHD2,FHOD3,FLNC,GREM1,HAND2,HEY2,IGF1,IGFBP5,ITGB1,JAM2,MYH10,MYH11,MYOCD,MYOF,PDGFRA,PDGFRB,PGM5,PI16,POPDC2,PRKG1,RBM24,RGS4,SGCB,SGCD,SLC25A4,SMO,SORBS2,SPEG,TMEM119,TMOD1,TNNT2,UCHL1,WFIKKN2,WISP1
GO:BP	chemical homeostasis	GO:0048878	2.20079e-07	6.65742	1246	1294	133	21354	ACKR3,ACKR4,ADCY5,ADCYAP1,ADCYAP1R1,ADGRF5,AGTR1A,AKAP6,ANK1,ANK2,APLNR,ATP1A2,ATP1B2,ATP2B3,ATP2B4,BDKRB2,BMP4,BRSK2,C1QTNF3,C3AR1,C5AR1,C7,CACNA1C,CACNA1G,CACNB2,CALB2,CAR14,CASQ1,CASQ2,CAV1,CAV2,CAV3,CDH5,CNR1,CX3CR1,CYP7B1,DBH,DCN,DLG4,DMD,DMPK,EDNRA,EDNRB,EFNA5,EPOR,ESR1,F2R,FABP3,FAM155A,FBN1,FGF2,FGF7,FKBP1B,FXYD1,FZD2,GALR2,GATA2,GCGR,GJA1,GJA5,GPR20,GPR27,GPR4,GPRC5B,GRIA1,HAS2,IGF1,IGFB…
GO:BP	regulation of secretion	GO:0051046	2.33101e-07	6.63246	729	1294	90	21354	ADCY1,ADCY5,ADCYAP1,AGTR1A,ANXA1,APBA1,APBB1,APLN,BACE1,BRSK2,C1QTNF3,CACNA1B,CACNA1G,CACNB2,CADPS,CD200,CHRM2,CHRNA3,CHRNA5,CNR1,CPLX1,CXCL12,DOC2B,EDNRB,EFNA5,ENHO,F2R,FGFR1,FKBP1B,FOXF1,FRMD4A,GABBR1,GAL,GATA2,GJA1,GJA5,GPR27,IGF1,IGFBP3,IRS1,KCNA2,KCNB1,KCNC4,LEPR,MYH10,MYOM1,NCS1,NELL2,NGF,NLGN2,NOS1,NPY1R,NPY2R,NTSR1,OPRK1,OPRL1,P3H1,PAM,PFKM,PLA2R1,PPP1R9A,PRKG1,PTGES,RAB11FIP5,RAB12,RAB3B…
GO:BP	regulation of endothelial cell proliferation	GO:0001936	2.44425e-07	6.61185	135	1294	31	21354	ACVRL1,AGTR1A,APLN,APLNR,ATOH8,BMP4,CAV1,CAV2,CDH13,CXCL12,DYSF,ECM1,ENG,F3,FGF2,FGFR1,FLT1,FLT4,GATA2,GJA1,IGF1,KDR,NR2F2,PLXNB3,PRKD1,PTPRM,SCG2,SPARC,TEK,VASH1,VEGFB
GO:BP	regulation of growth	GO:0040008	2.44988e-07	6.61086	684	1294	86	21354	ACVRL1,AKAP6,APBB1,BMP4,CACNA1C,CAV3,CDKL5,CLSTN3,COL14A1,CRYAB,CXCL12,DACT3,DCBLD2,EFNA5,EPHA7,FAM107A,FBLN5,FGF2,FGFR1,FLT4,FN1,FRZB,GAP43,GAS1,GJA1,GPC3,GREM1,HEY2,HLX,IGF1,IGFBP2,IGFBP3,IGFBP4,IGFBP5,IGFBP7,KAZALD1,KCNK2,KRT17,LGMN,MAP1B,MAPT,MEIS1,MGLL,MUSK,MYOCD,NDN,NELL2,NGF,NKD1,NOG,NPY1R,NRP1,NTN1,OLFM1,P3H1,PI16,PLCB1,PLXNA4,PTPRS,RERG,RGMA,RGS4,SEMA3A,SEMA3F,SEMA3G,SERPINE2,SFRP1,SGIP1…
GO:BP	regulation of potassium ion transmembrane transport	GO:1901379	2.68417e-07	6.57119	91	1294	25	21354	AKAP6,AMIGO1,ANK2,ATP1B2,CASQ2,CAV1,CAV3,DPP6,FLNA,GAL,GALR2,ITGB1,KCNAB1,KCNC2,KCNE4,KCNG1,KCNH2,KCNIP2,KCNIP4,KCNMB1,LRRC55,OPRK1,PRKG1,RGS4,RNF207
GO:BP	response to inorganic substance	GO:0010035	3.27785e-07	6.48441	609	1294	79	21354	ADCY1,ANXA1,APBB1,ATP2B4,AXL,BACE1,CACNA1G,CACNA1H,CAV1,CNGA3,COL1A1,CPNE4,CRYAB,CYP1B1,DLG2,DLG4,DMD,DMTN,EEF1A2,EPOR,FBLN5,FIBIN,FKBP1B,FN1,FSTL3,GNAO1,GPR37,GPR37L1,HGF,HPCA,IGFBP2,KCNA5,KCNC2,KCNK3,KCNMB1,KCNQ3,KDR,LGMN,LOXL2,MAP1B,MAPK10,MAPT,MMP2,MYLK,NEFL,NFATC4,NGB,NOL3,NOS3,NPTX1,PAM,PDGFD,PDGFRB,PENK,PKD2,PLCB1,PLN,PTGES,PTGS2,RYR2,SCN5A,SLC25A23,SLC8A1,SNCA,SOD3,SPARC,SYT1,SYT13,SYT15,…
GO:BP	negative regulation of cell migration	GO:0030336	3.37225e-07	6.47208	286	1294	48	21354	ACVRL1,ADARB1,APOD,ATP1B2,ATP2B4,CHRD,COL3A1,CX3CR1,CXCL12,CYGB,CYP1B1,DCN,DLC1,EMILIN1,ENG,FGF2,GJA1,GPR173,GREM1,HOXA7,IGFBP3,IGFBP5,KANK1,LIMCH1,MEOX2,MMRN2,MYOCD,NDRG4,NOG,NR2F2,PHLDB2,PLCB1,PLXNB3,PRKG1,PTN,PTPRM,PTPRU,RECK,ROBO1,ROBO4,SEMA3A,SFRP1,SLIT2,STC1,TCAF1,TIE1,TPM1,VASH1
GO:BP	regulation of calcium ion transmembrane transporter activity	GO:1901019	3.39115e-07	6.46965	85	1294	24	21354	AKAP6,ANK2,ATP1A2,BMP4,CACNB1,CACNB2,CASQ1,CASQ2,CAV3,DMD,DYSF,FKBP1B,HPCA,HSPA2,JPH2,JPH3,OPRL1,P2RY6,PKD2,PLN,REM1,RYR2,STAC,TRDN
GO:BP	response to abiotic stimulus	GO:0009628	3.58737e-07	6.44522	1180	1294	127	21354	ACVRL1,AGTR1A,AK4,AKAP12,ANXA1,APOLD1,ASIC2,ATP1A2,ATP2B4,B4GALT2,BACE1,BDKRB2,BRSK1,CACNA1C,CASQ1,CAV1,CAV3,CDS2,CERS1,CIDEA,CKM,CNTNAP2,COL1A1,COL3A1,CPEB1,CRYAB,CTGF,CXCL12,CYGB,DBH,DCN,DMD,DYSF,EDNRA,EEF1A2,EIF4EBP1,ENG,ETV1,FBXL22,FGF1,FMN2,FNDC1,FOXP2,GJA1,GPR4,HNMT,HPCA,HSPA2,HSPB7,IGF1,IGFBP2,IGFBP7,IL1R1,ITGB1,KCNA5,KCNC2,KCND2,KCNK2,KCNK3,KCNMB1,LGMN,LHFPL5,LOXL2,MAP1B,MAPK10,MAPT,MFAP4…
GO:BP	cellular response to BMP stimulus	GO:0071773	3.91321e-07	6.40747	170	1294	35	21354	9330182L06RIK,ACVRL1,ADAMTS7,BMP4,BMP5,BMPER,CAV1,CDH5,CERS1,CHRD,CHRDL1,ENG,FBN1,FSTL1,FSTL3,FZD1,GPC3,GREM1,GREM2,HTRA3,KCND3,NOG,PHOX2B,RBPMS2,RGMA,RGMB,ROR2,SFRP1,SMAD9,TGFB2,TGFBR3,TMEM100,TWSG1,ZCCHC12,ZFP423
GO:BP	response to BMP	GO:0071772	3.91321e-07	6.40747	170	1294	35	21354	9330182L06RIK,ACVRL1,ADAMTS7,BMP4,BMP5,BMPER,CAV1,CDH5,CERS1,CHRD,CHRDL1,ENG,FBN1,FSTL1,FSTL3,FZD1,GPC3,GREM1,GREM2,HTRA3,KCND3,NOG,PHOX2B,RBPMS2,RGMA,RGMB,ROR2,SFRP1,SMAD9,TGFB2,TGFBR3,TMEM100,TWSG1,ZCCHC12,ZFP423
GO:BP	calcium ion transport into cytosol	GO:0060402	3.91321e-07	6.40747	170	1294	35	21354	ADCYAP1R1,AGTR1A,AKAP6,ANK2,APLNR,BMP4,CACNA1C,CACNA1G,CASQ1,CASQ2,CAV1,DMD,EDNRA,F2R,FAM155A,FGF2,FKBP1B,JPH2,JPH3,NGF,NOL3,NTSR1,P2RY6,PKD2,PLN,PRKD1,RYR2,SLC8A1,SLC8A2,SNCA,TGFB2,TRDN,TRPC1,TRPC3,XCR1
GO:BP	positive regulation of neuron projection development	GO:0010976	4.36424e-07	6.36009	214	1294	40	21354	ADAMTS1,ADCYAP1,AMIGO1,APBB1,ATP1B2,BMP4,BMP5,CNR1,CNTN1,CPEB1,DMD,ELAVL4,EPOR,FEZ1,FGFR1,FKBP1B,FLNA,FZD1,GPRC5B,HGF,HSPB1,ITGB1,MAPT,NDRG4,NEGR1,NGF,P3H1,PLXNB3,PPP1R9A,PRKD1,PTK7,PTN,RGMA,RIT2,ROR1,ROR2,SCN1B,SERPINE2,STMN2,ZFP804A
GO:BP	vascular process in circulatory system	GO:0003018	4.82411e-07	6.31658	197	1294	38	21354	ACTA2,ADRA2B,ADRA2C,AGTR1A,AKAP12,ANGPT1,APLN,ASIC2,ATP1A2,BDKRB2,CACNA1C,CACNA1G,CAV1,CDH5,DBH,DOCK4,EDNRA,EDNRB,F2R,FERMT2,GJA1,GJA5,GPR4,KCNA5,MMP2,MRVI1,NOS1,NOS3,NPY1R,PRKG1,PTGS2,RAMP2,SLC16A2,SLIT2,SOD3,TACR1,TACR2,TBXAS1
GO:BP	regulation of synapse assembly	GO:0051963	5.73292e-07	6.24162	116	1294	28	21354	ADGRB2,ADGRL1,ADGRL3,AMIGO1,ASIC2,CBLN2,CLSTN2,CLSTN3,EFNA5,EPHA7,FLRT2,FZD1,GPC6,LRFN1,LRRC4B,LRRN3,LRRTM1,MUSK,NLGN2,NTN1,PPP1R9A,PTPRS,SLITRK3,SLITRK5,SNCA,SRPX2,SYNDIG1,THBS2
GO:BP	osteoblast differentiation	GO:0001649	5.78028e-07	6.23805	207	1294	39	21354	BMP4,CHRD,COL1A1,DDR2,DHH,FERMT2,FGF2,FGFR1,FZD1,GABBR1,GDF10,GJA1,GLI2,GLI3,GREM1,HAND2,ID4,IGF1,IGFBP3,IGFBP5,LRP3,NELL1,NOG,NPNT,PDLIM7,PENK,PRKD1,PTH1R,RSPO2,SCUBE2,SFRP1,SMO,SNAI1,SNAI2,TMEM119,TWIST1,TWSG1,WISP1,WWTR1
GO:BP	negative regulation of cellular component movement	GO:0051271	5.92968e-07	6.22697	310	1294	50	21354	ACVRL1,ADARB1,APOD,ATP1B2,ATP2B4,CHRD,COL3A1,CX3CR1,CXCL12,CYGB,CYP1B1,DCN,DLC1,EMILIN1,ENG,FGF2,GJA1,GPR173,GREM1,HOXA7,IGFBP3,IGFBP5,KANK1,LIMCH1,MEOX2,MMRN2,MYOCD,NDRG4,NOG,NOS1,NR2F2,PHLDB2,PLCB1,PLXNB3,PRKG1,PTN,PTPRM,PTPRU,RECK,ROBO1,ROBO4,SEMA3A,SFRP1,SLIT2,STC1,TCAF1,TGFBR3,TIE1,TPM1,VASH1
GO:BP	cAMP-mediated signaling	GO:0019933	6.30391e-07	6.20039	190	1294	37	21354	ADCY1,ADCY5,ADCYAP1,ADCYAP1R1,ADGRB2,ADGRE1,ADGRG3,ADGRG6,ADGRL1,ADGRL3,ADGRL4,ADRA2C,APLNR,ATP2B4,CALCRL,CNR1,GAL,GALR2,GCGR,GNAI1,GPR161,GPR4,MRAP2,NOS1,NPY2R,OPRL1,PDE7B,PLN,PRKAR1B,PRKAR2B,PTGER1,PTGFR,PTGIR,PTH1R,RAMP2,RIT2,SSTR4
GO:BP	cellular homeostasis	GO:0019725	6.49491e-07	6.18743	969	1294	109	21354	ACKR3,ACKR4,ADCY5,ADCYAP1,ADCYAP1R1,AGTR1A,AKAP6,ANK2,APLNR,ATP1A2,ATP1B2,ATP2B3,ATP2B4,BDKRB2,BMP4,BRSK2,C1QTNF3,C3AR1,C5AR1,C7,CACNA1C,CACNA1G,CACNB2,CALB2,CASQ1,CASQ2,CAV1,CAV2,CAV3,CDH5,CFL2,CNR1,CX3CR1,DLG4,DMD,DMPK,EDNRA,EDNRB,EFNA5,EPOR,ESR1,F2R,FAM155A,FGF2,FKBP1B,FXYD1,FZD2,GALR2,GATA2,GJA1,GPR20,GPR27,GPR4,GRIA1,IGF1,JPH2,JPH3,KCNA5,KCNB1,KCNK3,KCTD17,LEPR,MICU3,NCS1,NELL2,NGF,NOL3,NOS1…
GO:BP	forebrain development	GO:0030900	7.73306e-07	6.11165	424	1294	61	21354	ADCYAP1,ALDH1A3,ATP1A2,ATP1B2,ATP2B4,AXL,BBS1,BMP4,CCDC141,CDH2,CHRD,CNTNAP2,COL3A1,CRTAC1,CXCL12,DMD,ELAVL4,FAT4,FEZ1,FGF13,FGF2,FGFR1,FLNA,FOXP2,FUT10,GATA2,GLI2,GLI3,GNAO1,ID4,KCNC2,KIF1A,LAMB1,MYH10,NEFL,NOG,NOTCH3,NR2F2,NRP1,NRP2,NUMBL,PCDH9,PHACTR1,PLCB1,PLXNA4,PRKG1,PTN,PTPRS,ROBO1,RTN4RL2,SALL1,SEMA3A,SHANK3,SLC8A1,SLIT2,SLITRK5,SMO,SSTR1,SSTR4,TWSG1,WNT2B
GO:BP	regulation of Wnt signaling pathway	GO:0030111	9.19521e-07	6.03644	304	1294	49	21354	ADGRA2,APC2,CAV1,CDH2,CDH3,COL1A1,DAAM2,DAB2,DACT1,DACT3,DKK2,DKK3,EDA,FGF2,FOXL1,FRZB,FZD1,GLI3,GPC3,GPRC5B,GRB10,GREM1,KANK1,NFATC4,NKD1,NKD2,NOG,NXN,PLEKHA4,PLPP3,PRICKLE1,PTK7,PTPRU,RBMS3,RECK,ROR2,RSPO2,RSPO3,SALL1,SFRP1,SHISA6,SNAI2,SOX10,SOX17,SOX7,TMEM88,WISP1,WLS,WWTR1
GO:BP	muscle organ development	GO:0007517	9.53018e-07	6.0209	324	1294	51	21354	ADARB1,ANGPT1,BMP4,BVES,CASQ1,CAV1,CAV2,CCM2L,CFL2,CNTFR,COL3A1,CRYAB,DCN,DES,DMD,DNER,ENG,EPOR,ETV1,FOXP2,FZD1,FZD2,GJA1,HAND1,HEY2,HLX,JPH2,KCNAB1,MEOX2,MYLK,MYOCD,MYOM1,NOG,NR2F2,PHOX2B,PLAGL1,POPDC2,RBFOX1,RBM24,RYR2,S100B,SGCB,SMO,TCF21,TGFB2,TIFAB,TNNT2,TPM1,TWIST1,UNC45B,ZFPM2
GO:BP	vasculogenesis	GO:0001570	9.6741e-07	6.01439	89	1294	24	21354	ACKR3,ANGPT1,APLNR,CAV1,ENG,EPOR,FGF1,FGFR1,FOXF1,GJC1,HAS2,HEY2,MYOCD,NRP1,PDGFRB,RAMP2,RASIP1,SMO,SOX17,SOX18,TEK,TIE1,TMEM100,ZFPM2
GO:BP	vesicle-mediated transport in synapse	GO:0099003	9.92314e-07	6.00335	238	1294	42	21354	ADCY1,APBA1,BACE1,BRSK1,CACNB2,CADPS,CALY,CDH2,CHRM2,CHRNA3,CHRNA5,CNR1,CPLX1,DNAJC6,DOC2B,HPCA,MAPK10,NAPB,NCS1,NLGN2,NSG1,PCDH17,PLS3,PRKAR1B,RAB3B,RIMS3,SLC10A4,SLC18A2,SLC2A4,SNAP25,SNCA,SNCB,SV2A,SYN1,SYN2,SYNDIG1,SYP,SYT1,SYT17,SYT4,SYT6,SYT9
GO:BP	mesonephros development	GO:0001823	1.10726e-06	5.95575	104	1294	26	21354	AGTR1A,BMP4,BMPER,DCHS1,FAT4,FGF1,FGF2,FGFR1,GDNF,GLI3,GPC3,GREM1,KIF26B,MAGED1,NOG,NPNT,OSR1,PKD2,SFRP1,SLIT2,SMAD9,SMO,SPRY1,TCF21,WNT2B,ZBTB16
GO:BP	vasoconstriction	GO:0042310	1.19398e-06	5.923	97	1294	25	21354	ACTA2,ADRA2B,ADRA2C,AGTR1A,APLN,ASIC2,ATP1A2,BDKRB2,CACNA1C,CACNA1G,CAV1,DBH,DOCK4,EDNRA,EDNRB,F2R,GJA1,GJA5,KCNA5,MMP2,NOS1,NPY1R,PTGS2,TACR1,TBXAS1
GO:BP	positive regulation of endothelial cell migration	GO:0010595	1.24009e-06	5.90655	112	1294	27	21354	ADGRA2,AMOTL1,ANGPT1,ANXA1,ATOH8,BMP4,CCBE1,FGF1,FGF18,FGF2,FGFR1,FLT4,GATA2,HSPB1,IGF1,KDR,LGMN,NOS3,NRP1,PLPP3,PRKD1,PTGS2,RHOJ,SNAI2,SPARC,SRPX2,TEK
GO:BP	positive regulation of cell junction assembly	GO:1901890	1.24009e-06	5.90655	112	1294	27	21354	ADGRB2,ADGRL1,ADGRL3,AMIGO1,ASIC2,CAV1,CBLN2,CLSTN2,CLSTN3,COL16A1,EFNA5,FERMT2,FLRT2,KDR,LRRC4B,LRRN3,LRRTM1,MUSK,NLGN2,NPHP1,NRP1,SLITRK3,SLITRK5,SRPX2,SYNDIG1,TEK,THBS2
GO:BP	positive regulation of MAPK cascade	GO:0043410	1.25529e-06	5.90126	515	1294	69	21354	ACKR3,ACTA2,ADCYAP1,ADRA2B,ADRA2C,AKAP12,ANGPT1,BMP4,BMPER,C1QTNF2,C1QTNF3,C5AR1,CAV2,CDH2,CSPG4,CTGF,EDAR,EDNRA,EPOR,ESR1,F2R,FERMT2,FGF1,FGF18,FGF2,FGFR1,FGFR2,FLT1,FLT4,GPBAR1,GPR37,GPR37L1,HAND2,HGF,IGF1,IGFBP3,IGFBP4,KDR,LEPR,MAGED1,MAP4K5,MAPK8IP1,MAPK8IP2,MTURN,NDRG4,NECAB2,NGF,NPNT,NRP1,OPRK1,P2RY6,PDGFD,PDGFRA,PDGFRB,PELI2,PLCB1,RIT2,ROBO1,ROR1,ROR2,SHC2,SORBS3,SSTR4,TEK,TGFB2,TGFB3,TIMP…
GO:BP	camera-type eye development	GO:0043010	1.32026e-06	5.87934	347	1294	53	21354	ACVRL1,ALDH1A3,ARHGEF15,ATP2B4,BMP4,CACNA1C,CC2D2A,CELF4,CFH,CNGA3,COL8A1,COL8A2,CRYAB,CYP1B1,EFEMP1,FBN1,FGF2,FJX1,FOXF2,FOXP2,GAS1,GJA1,GLI3,HPCA,LAMA1,LAMB2,LAMC3,MAB21L1,MAB21L2,MEIS1,MYH10,MYOM1,NES,NRP1,OBSL1,PDGFRA,PDGFRB,PTN,PTPRM,RARG,RHOJ,SDK1,SDK2,SIX5,SPRY1,TBX2,TGFB2,TMOD1,TUB,TWIST1,TWSG1,UNC45B,ZEB1
GO:BP	regulation of animal organ morphogenesis	GO:2000027	1.33221e-06	5.87543	120	1294	28	21354	AGTR1A,BMP4,CAV3,DAB2,DACT1,EDNRA,FGF1,FGF2,FGF7,FGFR1,FZD1,FZD2,GDNF,GPC3,GREM1,HGF,MAGED1,NKD1,NOG,PLEKHA4,PTK7,ROR2,RSPO2,SFRP1,SMO,SNAI2,SPRY1,WNT2B
GO:BP	kidney vasculature development	GO:0061440	1.3561e-06	5.86771	30	1294	14	21354	ACTA2,ANGPT1,BMP4,C3AR1,GPR4,NOTCH3,NRP1,OSR1,PDGFD,PDGFRA,PDGFRB,PKD2,TCF21,TEK
GO:BP	renal system vasculature development	GO:0061437	1.3561e-06	5.86771	30	1294	14	21354	ACTA2,ANGPT1,BMP4,C3AR1,GPR4,NOTCH3,NRP1,OSR1,PDGFD,PDGFRA,PDGFRB,PKD2,TCF21,TEK
GO:BP	regulation of synaptic plasticity	GO:0048167	1.38676e-06	5.858	213	1294	39	21354	ADCY1,BACE1,BRSK1,CALB2,CPEB1,CX3CR1,DLG4,FAM107A,GFAP,GRIA1,JPH3,JPH4,KCNB1,KCNJ10,LGMN,LRRTM1,MAP1B,MAPT,MGLL,MPP2,MUSK,NFATC4,NOS1,NSG1,PPP1R9A,PTGS2,PTN,RIMS3,S100B,SERPINE2,SHANK3,SHISA6,SLC8A2,SNAP25,SNCA,SYN1,SYNGR1,SYP,SYT4
GO:BP	coronary vasculature development	GO:0060976	1.41058e-06	5.8506	70	1294	21	21354	ANGPT1,APLN,APLNR,BMP4,EPOR,FGF1,FGF2,FGFR1,GPC3,HAND2,HEY2,LTBP1,MYH10,MYOCD,NRP1,PDGFRB,PRICKLE1,PTK7,SGCD,VEGFB,ZFPM2
GO:BP	transforming growth factor beta receptor signaling pathway	GO:0007179	1.46378e-06	5.83453	178	1294	35	21354	ACVRL1,ASPN,CAV1,CAV2,CAV3,CD109,CDH5,CIDEA,COL1A2,COL3A1,DAB2,EMILIN1,ENG,FBN1,FERMT2,GDNF,HTRA3,ITGA8,LRRC32,LTBP1,LTBP3,LTBP4,MYOCD,NPNT,PEG10,SMAD9,SPRY1,TGFB1I1,TGFB2,TGFB3,TGFBR3,TWSG1,VASN,WFIKKN2,ZEB1
GO:BP	system process	GO:0003008	1.48918e-06	5.82705	2990	1294	259	21354	ABCC9,ACTA2,ACVRL1,ADARB1,ADCY1,ADCY5,ADCYAP1,ADGRF5,ADRA2B,ADRA2C,AGTR1A,AKAP12,AKAP6,ALDH1A3,ANGPT1,ANK2,AOC3,APLN,ASIC2,ATP1A2,ATP2B4,B4GALT2,BACE1,BBS1,BDKRB2,BMP4,BRSK1,BVES,C1QTNF3,C3AR1,C5AR1,CACNA1B,CACNA1C,CACNA1G,CACNA1H,CACNB2,CACNG4,CALCRL,CALD1,CASQ1,CASQ2,CAV1,CAV3,CCBE1,CDH5,CELF4,CFH,CHL1,CHRM2,CHRNA3,CHRNA5,CNGA3,CNR1,CNTN5,CNTNAP2,COL14A1,COL1A1,COL1A2,CTGF,CTNNA2,CTNNA3,CX3CR1,…
GO:BP	regulation of cell growth	GO:0001558	1.57869e-06	5.8017	421	1294	60	21354	ACVRL1,AKAP6,APBB1,CAV3,CDKL5,CLSTN3,COL14A1,CRYAB,CXCL12,DACT3,DCBLD2,EFNA5,EPHA7,FAM107A,FBLN5,FLT4,FN1,FRZB,GAS1,GJA1,GREM1,IGF1,IGFBP3,IGFBP4,IGFBP5,IGFBP7,KAZALD1,KRT17,MAP1B,MAPT,MGLL,MYOCD,NGF,NRP1,NTN1,OLFM1,P3H1,PI16,PLXNA4,PTPRS,RERG,RGMA,RGS4,SEMA3A,SEMA3F,SEMA3G,SERPINE2,SFRP1,SLC25A4,SLIT2,SLIT3,SOX17,SYT1,SYT17,SYT4,TGFB2,TRO,TTL,WFDC1,WISP1
GO:BP	regulation of smooth muscle cell proliferation	GO:0048660	1.61046e-06	5.79305	170	1294	34	21354	ADAMTS1,APLN,APOD,BMP4,C3AR1,CALCRL,CAV1,CDH13,CNN1,ESR1,FGF2,FGFR2,GJA1,IGF1,IGFBP3,IGFBP5,MMP2,MYOCD,NDRG4,NOS3,NOTCH3,NPR1,P2RY6,PDE1A,PDGFD,PDGFRB,PRKG1,PTGIR,PTGS2,RBPMS2,RGS5,TACR1,TGFB3,WISP1
GO:BP	negative regulation of transmembrane receptor protein serine/threonine kinase signaling pathway	GO:0090101	1.63435e-06	5.78666	121	1294	28	21354	ASPN,BMPER,CAV1,CAV2,CD109,CHRD,CHRDL1,CIDEA,EMILIN1,ENG,FBN1,FSTL3,FZD1,GREM1,GREM2,HTRA3,LTBP1,NOG,PEG10,RBPMS2,SFRP1,SPRY1,TGFB1I1,TGFB3,TGFBR3,TWSG1,VASN,WFIKKN2
GO:BP	positive regulation of calcium ion transport	GO:0051928	1.68193e-06	5.77419	137	1294	30	21354	ADCYAP1R1,AGTR1A,AKAP6,ANK2,APLNR,BMP4,CACNA1C,CACNB2,CASQ1,CAV1,CXCL12,EDNRA,F2R,GJC2,HSPA2,JPH2,MYLK,NTSR1,P2RY6,PDGFRB,PKD2,PLP1,RYR2,SNCA,STAC,STC1,TRDN,TRPC1,TRPC3,TRPC6
GO:BP	regulation of chondrocyte differentiation	GO:0032330	1.77938e-06	5.74973	52	1294	18	21354	ADAMTS7,BMP4,CHADL,CTGF,EFEMP1,FGF18,GLI2,GLI3,GREM1,LOXL2,LTBP3,MUSTN1,NKX3-2,RARG,SNAI2,WISP1,WNT9A,ZBTB16
GO:BP	negative regulation of cell motility	GO:2000146	1.79625e-06	5.74563	300	1294	48	21354	ACVRL1,ADARB1,APOD,ATP1B2,ATP2B4,CHRD,COL3A1,CX3CR1,CXCL12,CYGB,CYP1B1,DCN,DLC1,EMILIN1,ENG,FGF2,GJA1,GPR173,GREM1,HOXA7,IGFBP3,IGFBP5,KANK1,LIMCH1,MEOX2,MMRN2,MYOCD,NDRG4,NOG,NR2F2,PHLDB2,PLCB1,PLXNB3,PRKG1,PTN,PTPRM,PTPRU,RECK,ROBO1,ROBO4,SEMA3A,SFRP1,SLIT2,STC1,TCAF1,TIE1,TPM1,VASH1
GO:BP	Wnt signaling pathway	GO:0016055	1.82158e-06	5.73955	412	1294	59	21354	ADGRA2,AMOTL1,APC2,CAV1,CDH2,CDH3,COL1A1,DAAM2,DAB2,DACT1,DACT3,DKK2,DKK3,EDA,FERMT2,FGF2,FOXL1,FRZB,FZD1,FZD2,GLI3,GPC3,GPRC5B,GRB10,GREM1,KANK1,MARK1,NFATC4,NKD1,NKD2,NOG,NXN,PKD2,PLEKHA4,PLPP3,PRICKLE1,PTK7,PTPRU,PYGO1,RBMS3,RECK,ROR1,ROR2,RSPO2,RSPO3,SALL1,SFRP1,SHISA6,SNAI2,SOX10,SOX17,SOX7,TGFB1I1,TMEM88,WISP1,WLS,WNT2B,WNT9A,WWTR1
GO:BP	postsynapse organization	GO:0099173	1.83458e-06	5.73646	197	1294	37	21354	ARHGAP44,ARHGEF9,CADM1,CDH2,CDKL5,CNKSR2,DGKB,DLG2,DLG4,EPHA7,GAP43,GDNF,GLRB,INA,KIF1A,LGMN,LRFN1,LRRC4B,LRRTM1,MPP2,MUSK,MYH10,NEFL,NLGN2,NRP1,NRP2,PPP1R9A,PTN,PTPRS,RPH3A,SEMA3F,SHANK3,SHISA6,SORBS2,TANC2,ZFP365,ZFP804A
GO:BP	regulation of cartilage development	GO:0061035	1.88948e-06	5.72366	71	1294	21	21354	ADAMTS7,BMP4,CHADL,CTGF,EFEMP1,FGF18,FRZB,GLI2,GLI3,GREM1,LOXL2,LTBP3,MUSTN1,NKX3-2,NOG,RARG,SNAI2,TGFB2,WISP1,WNT9A,ZBTB16
GO:BP	ureteric bud development	GO:0001657	1.90709e-06	5.71963	99	1294	25	21354	AGTR1A,BMP4,BMPER,DCHS1,FAT4,FGF1,FGF2,FGFR1,GDNF,GLI3,GPC3,GREM1,KIF26B,MAGED1,NOG,NPNT,OSR1,PKD2,SFRP1,SLIT2,SMAD9,SMO,SPRY1,TCF21,WNT2B
GO:BP	regulation of canonical Wnt signaling pathway	GO:0060828	1.92377e-06	5.71585	243	1294	42	21354	ADGRA2,APC2,CAV1,CDH2,CDH3,COL1A1,DAAM2,DAB2,DACT1,DACT3,DKK2,DKK3,EDA,FGF2,FRZB,FZD1,GLI3,GPC3,GPRC5B,GREM1,KANK1,NKD1,NKD2,NOG,PLEKHA4,PRICKLE1,PTK7,PTPRU,RBMS3,RECK,ROR2,RSPO2,RSPO3,SFRP1,SHISA6,SNAI2,SOX10,SOX17,SOX7,TMEM88,WLS,WWTR1
GO:BP	homeostatic process	GO:0042592	2.09073e-06	5.6797	1946	1294	183	21354	ACKR3,ACKR4,ADCY5,ADCYAP1,ADCYAP1R1,ADGRF5,AGTR1A,AKAP6,ANGPT1,ANK1,ANK2,ANXA1,APLN,APLNR,ARMCX1,ATP1A2,ATP1B2,ATP2B3,ATP2B4,AXL,BBS1,BDKRB2,BMP4,BRSK2,C1QTNF3,C1QTNF9,C3AR1,C5AR1,C7,CACNA1C,CACNA1G,CACNB2,CALB2,CAR14,CASQ1,CASQ2,CAV1,CAV2,CAV3,CDH2,CDH3,CDH5,CFL2,CIDEA,CNR1,COL14A1,CRISPLD1,CTGF,CX3CR1,CYP7B1,CYTL1,DBH,DCN,DLG4,DMD,DMPK,DMTN,EDNRA,EDNRB,EFNA5,EPOR,ESR1,F2R,FABP3,FAM155A,FBN1,FGF…
GO:BP	regulation of intracellular signal transduction	GO:1902531	2.12666e-06	5.6723	1574	1294	155	21354	ACKR3,ACTA2,ADCYAP1,ADCYAP1R1,ADGRG3,ADRA2B,ADRA2C,AKAP12,AKAP6,ANGPT1,APLNR,ARHGAP44,ARHGEF25,ATP2B4,AXL,BDKRB2,BMP4,BMPER,C1QTNF2,C1QTNF3,C5AR1,CADM4,CAV1,CAV2,CAV3,CDH13,CDH2,CHN1,COL3A1,CSPG4,CTGF,CX3CR1,CXCL12,DACT1,DCN,DLC1,DMD,EDA,EDAR,EDNRA,EMILIN1,ENG,EPHA7,EPOR,ESR1,F2R,F3,FAM83D,FBXL2,FERMT2,FGF1,FGF18,FGF2,FGFR1,FGFR2,FLNA,FLT1,FLT4,FN1,GNAI1,GPBAR1,GPR20,GPR37,GPR37L1,GPR4,GPRC5B,GRE…
GO:BP	chondrocyte differentiation	GO:0002062	2.16001e-06	5.66554	107	1294	26	21354	ADAMTS7,BMP4,CHADL,CTGF,CYTL1,ECM1,EFEMP1,FGF18,FGFR1,GLI2,GLI3,GREM1,LOXL2,LTBP3,MUSTN1,NKX3-2,OSR1,PTH1R,RARG,SCUBE2,SERPINH1,SNAI2,WISP1,WNT2B,WNT9A,ZBTB16
GO:BP	cell-cell signaling by wnt	GO:0198738	2.20185e-06	5.65721	414	1294	59	21354	ADGRA2,AMOTL1,APC2,CAV1,CDH2,CDH3,COL1A1,DAAM2,DAB2,DACT1,DACT3,DKK2,DKK3,EDA,FERMT2,FGF2,FOXL1,FRZB,FZD1,FZD2,GLI3,GPC3,GPRC5B,GRB10,GREM1,KANK1,MARK1,NFATC4,NKD1,NKD2,NOG,NXN,PKD2,PLEKHA4,PLPP3,PRICKLE1,PTK7,PTPRU,PYGO1,RBMS3,RECK,ROR1,ROR2,RSPO2,RSPO3,SALL1,SFRP1,SHISA6,SNAI2,SOX10,SOX17,SOX7,TGFB1I1,TMEM88,WISP1,WLS,WNT2B,WNT9A,WWTR1
GO:BP	canonical Wnt signaling pathway	GO:0060070	2.21004e-06	5.6556	292	1294	47	21354	ADGRA2,APC2,CAV1,CDH2,CDH3,COL1A1,DAAM2,DAB2,DACT1,DACT3,DKK2,DKK3,EDA,FGF2,FRZB,FZD1,FZD2,GLI3,GPC3,GPRC5B,GREM1,KANK1,NKD1,NKD2,NOG,PLEKHA4,PLPP3,PRICKLE1,PTK7,PTPRU,PYGO1,RBMS3,RECK,ROR2,RSPO2,RSPO3,SFRP1,SHISA6,SNAI2,SOX10,SOX17,SOX7,TMEM88,WLS,WNT2B,WNT9A,WWTR1
GO:BP	BMP signaling pathway	GO:0030509	2.22192e-06	5.65327	155	1294	32	21354	9330182L06RIK,ACVRL1,BMP4,BMP5,BMPER,CAV1,CDH5,CERS1,CHRD,CHRDL1,ENG,FBN1,FSTL1,FSTL3,FZD1,GPC3,GREM1,GREM2,HTRA3,NOG,RBPMS2,RGMA,RGMB,ROR2,SFRP1,SMAD9,TGFB2,TGFBR3,TMEM100,TWSG1,ZCCHC12,ZFP423
GO:BP	negative regulation of locomotion	GO:0040013	2.28984e-06	5.64019	332	1294	51	21354	ACVRL1,ADARB1,APOD,ATP1B2,ATP2B4,CHRD,COL3A1,CX3CR1,CXCL12,CYGB,CYP1B1,DCN,DLC1,EMILIN1,ENG,FGF2,GJA1,GPR173,GREM1,HOXA7,IGFBP3,IGFBP5,KANK1,LIMCH1,MEOX2,MMRN2,MYOCD,NDRG4,NOG,NR2F2,NRP1,PHLDB2,PLCB1,PLXNB3,PRKG1,PTN,PTPRM,PTPRU,RECK,ROBO1,ROBO4,SEMA3A,SEMA3F,SEMA3G,SFRP1,SLIT2,STC1,TCAF1,TIE1,TPM1,VASH1
GO:BP	kidney epithelium development	GO:0072073	2.34907e-06	5.6291	147	1294	31	21354	AGTR1A,BMP4,BMPER,DCHS1,EPHA7,FAT4,FGF1,FGF2,FGFR1,GDNF,GLI3,GPC3,GREM1,KANK2,KIF26B,LAMB2,MAGED1,NOG,NPNT,OSR1,PKD2,PODXL,SALL1,SFRP1,SLIT2,SMAD9,SMO,SPRY1,TCF21,WNT2B,WWTR1
GO:BP	mesonephric epithelium development	GO:0072163	2.39798e-06	5.62015	100	1294	25	21354	AGTR1A,BMP4,BMPER,DCHS1,FAT4,FGF1,FGF2,FGFR1,GDNF,GLI3,GPC3,GREM1,KIF26B,MAGED1,NOG,NPNT,OSR1,PKD2,SFRP1,SLIT2,SMAD9,SMO,SPRY1,TCF21,WNT2B
GO:BP	mesonephric tubule development	GO:0072164	2.39798e-06	5.62015	100	1294	25	21354	AGTR1A,BMP4,BMPER,DCHS1,FAT4,FGF1,FGF2,FGFR1,GDNF,GLI3,GPC3,GREM1,KIF26B,MAGED1,NOG,NPNT,OSR1,PKD2,SFRP1,SLIT2,SMAD9,SMO,SPRY1,TCF21,WNT2B
GO:BP	cellular response to vascular endothelial growth factor stimulus	GO:0035924	2.44615e-06	5.61152	59	1294	19	21354	ADGRA2,ANXA1,ATP2B4,CADM4,CCBE1,DCN,FLT1,FLT4,GAS1,HSPB1,KDR,NRP1,NRP2,PDGFRA,PDGFRB,PRKD1,RAMP2,ROBO1,VEGFB
GO:BP	epithelial to mesenchymal transition	GO:0001837	2.80156e-06	5.5526	148	1294	31	21354	BMP4,COL1A1,DAB2,DACT3,ENG,FAM83D,FERMT2,FGFR1,FGFR2,FLNA,GJA1,GREM1,HAS2,HEY2,LOXL2,MYOCD,NOG,OLFM1,PHLDB2,SFRP1,SNAI1,SNAI2,SPRY1,TGFB1I1,TGFB2,TGFB3,TGFBR3,TMEM100,TWIST1,VASN,WWTR1
GO:BP	negative regulation of transport	GO:0051051	2.88159e-06	5.54037	503	1294	67	21354	ADCYAP1,ANGPT1,ANXA1,APOD,ATP1A2,CASQ2,CAV1,CAV3,CD200,CNR1,CRYAB,DLG4,DMTN,DYSF,ENHO,ESR1,F2R,FKBP1B,FOXF1,FRMD4A,GABBR1,GJA1,GNAO1,GRB10,HECW2,IGFBP3,IRS1,KCNAB1,KCNB1,KCNE4,KCNH2,LRRTM1,MAP1B,MAPT,NECAB2,NOL3,NOS1,NOS3,NPY1R,NPY2R,NTSR1,OPRK1,OPRL1,OSR1,PID1,PKD2,PKIA,PLCB4,PLN,PPP1R9A,PRKG1,PTGS2,RAB11FIP5,RAB23,REM1,RGS4,SERPINE2,SFRP1,SLC18A2,SNCA,STC1,SYT4,TACR2,TGFB2,TIFAB,TRDN,TWIST1
GO:BP	ear development	GO:0043583	2.97967e-06	5.52583	237	1294	41	21354	ALDH1A3,BMP4,BMP5,BMPER,CXCL14,CYTL1,DCHS1,FAT4,FGFR1,FREM2,FRZB,FZD2,GABRB3,GAS1,GATA2,GLI2,GLI3,HEY2,HPCA,IGF1,ITGA8,KCNK2,KCNK3,KCNQ4,LHFPL5,LRIG1,NKX3-2,NOG,NTN1,OSR1,PDGFRB,PHOX2B,PTK7,ROR1,ROR2,SOBP,SPARC,TGFB2,TGFB3,TIFAB,ZEB1
GO:BP	skeletal system morphogenesis	GO:0048705	2.97967e-06	5.52583	237	1294	41	21354	BMP4,COL1A1,CTGF,FGF18,FGFR2,GAS1,GLI3,GREM1,HAS2,HHIP,HOXA5,HOXA7,HOXB2,HOXC4,HOXC8,HOXC9,HOXD8,LTBP3,MMP16,MMP2,NKX3-2,NOG,OSR1,PDGFRA,PDGFRB,RAB23,RARG,ROR2,SCUBE2,SERPINH1,SFRP1,STC1,TEK,TGFB2,TGFB3,THBS3,TIFAB,TMEM119,TWIST1,WNT9A,ZEB1
GO:BP	regulation of anatomical structure size	GO:0090066	3.33238e-06	5.47725	549	1294	71	21354	ACTA2,ADRA2B,ADRA2C,AGTR1A,APLN,ASIC2,ATP1A2,BDKRB2,C1QTNF9,CACNA1C,CACNA1G,CAV1,CAV3,CDC42EP3,CDKL5,CFL2,CTNNA2,CXCL12,DBH,DMTN,DOCK4,EDNRA,EDNRB,EFNA5,EPHA7,F2R,FHOD3,FMN2,FN1,GJA1,GJA5,JMY,KANK1,KANK4,KCNA5,KIRREL,LMOD1,MAP1B,MAPT,MGLL,MMP2,MRVI1,NEFL,NGF,NOS1,NOS3,NPY1R,NRP1,NTN1,OLFM1,PLEKHH2,PLXNA4,PPP1R9A,PRKG1,PRR16,PTGS2,PTPRS,RAB3B,RGMA,SEMA3A,SEMA3F,SEMA3G,SHANK3,SLIT2,SOD3,TACR1,TBXAS…
GO:BP	cardiocyte differentiation	GO:0035051	3.58181e-06	5.4459	175	1294	34	21354	AKAP6,AW551984,BMP4,BVES,CAV3,COL14A1,FHOD3,GREM1,HAND2,HEY2,IGF1,ITGB1,MYH10,MYH11,MYOCD,PDGFRA,PDGFRB,PI16,POPDC2,PRICKLE1,PRKG1,RGS4,SGCB,SGCD,SLC25A4,SORBS2,SOX17,SOX18,SPEG,SPRY1,TBX2,TGFB2,TWIST1,WISP1
GO:BP	regulation of cardiac muscle cell contraction	GO:0086004	3.69318e-06	5.4326	37	1294	15	21354	AKAP6,ANK2,ATP1A2,CACNA1C,CASQ2,CAV1,CAV3,CTNNA3,FGF13,FXYD1,GJA5,PLN,RYR2,SCN5A,STC1
GO:BP	regulation of morphogenesis of an epithelium	GO:1905330	4.01298e-06	5.39653	67	1294	20	21354	AGTR1A,BMP4,CAV3,ESR1,FGF1,FGF7,FGFR1,GDNF,GJA1,GREM1,HGF,MAGED1,NKD1,NOG,PDGFRA,SFRP1,SMO,SNAI2,TBX2,WNT2B
GO:BP	regulation of sequestering of calcium ion	GO:0051282	4.38091e-06	5.35844	126	1294	28	21354	AKAP6,ANK2,APLNR,CACNA1C,CASQ1,CASQ2,DMD,EDNRA,F2R,FGF2,FKBP1B,JPH2,JPH3,NGF,NOL3,NTSR1,P2RY6,PKD2,PLN,PRKD1,RYR2,SLC25A23,SLC8A1,SNCA,TGFB2,TRDN,TRPC1,XCR1
GO:BP	MAPK cascade	GO:0000165	4.51389e-06	5.34545	784	1294	91	21354	ACKR3,ACTA2,ADCYAP1,ADRA2B,ADRA2C,AKAP12,ANGPT1,BMP4,BMPER,C1QTNF2,C1QTNF3,C5AR1,CAV1,CAV2,CAV3,CDH2,CRYAB,CSPG4,CTGF,DACT1,DMD,EDAR,EDNRA,EMILIN1,EPHA7,EPOR,ESR1,F2R,FAM83D,FERMT2,FGF1,FGF13,FGF18,FGF2,FGFR1,FGFR2,FLT1,FLT4,FN1,GPBAR1,GPR37,GPR37L1,GRB10,HAND2,HGF,IGF1,IGF1R,IGFBP3,IGFBP4,KDR,LEPR,MAGED1,MAP4K5,MAPK10,MAPK8IP1,MAPK8IP2,MTURN,NDRG4,NECAB2,NGF,NPNT,NRP1,OPRK1,P2RY6,PDGFD,PDGFRA,PD…
GO:BP	negative regulation of cellular response to growth factor stimulus	GO:0090288	4.67548e-06	5.33017	103	1294	25	21354	ADGRA2,APLN,ATP2B4,BMPER,CADM4,CAV1,CHRD,CHRDL1,DCN,EMILIN1,EPN2,FBN1,FSTL3,FZD1,GREM1,GREM2,HTRA3,MMRN2,NOG,RBPMS2,SFRP1,SLIT2,SPRY1,SPRY4,TWSG1
GO:BP	negative regulation of chondrocyte differentiation	GO:0032331	4.69037e-06	5.32879	23	1294	12	21354	ADAMTS7,BMP4,CHADL,EFEMP1,GLI2,GREM1,LTBP3,NKX3-2,RARG,SNAI2,WISP1,WNT9A
GO:BP	synaptic vesicle cycle	GO:0099504	4.95161e-06	5.30525	213	1294	38	21354	ADCY1,APBA1,BACE1,BRSK1,CACNB2,CADPS,CDH2,CHRM2,CHRNA3,CHRNA5,CNR1,CPLX1,DNAJC6,DOC2B,NAPB,NCS1,NLGN2,PCDH17,PLS3,PRKAR1B,RAB3B,RIMS3,SLC10A4,SLC18A2,SLC2A4,SNAP25,SNCA,SNCB,SV2A,SYN1,SYN2,SYNDIG1,SYP,SYT1,SYT17,SYT4,SYT6,SYT9
GO:BP	lung development	GO:0030324	4.95161e-06	5.30525	213	1294	38	21354	BMP4,CCBE1,CRISPLD2,CTGF,EIF4EBP1,FGF1,FGF18,FGF2,FGF7,FGFR1,FLT4,FOXF1,FOXP2,FSTL3,GLI2,GLI3,GPC3,HHIP,HOXA5,IGF1,IGFBP5,LAMA1,LTBP3,MYOCD,NOG,NOS3,PDGFRA,PDGFRB,PTK7,PTN,RCN3,RSPO2,SPARC,SPRY1,TCF21,TNC,WNT2B,ZFPM2
GO:BP	positive regulation of phosphate metabolic process	GO:0045937	5.08067e-06	5.29408	992	1294	108	21354	ACVRL1,ADCYAP1,ADCYAP1R1,ADGRF5,ADRA2B,ADRA2C,AFAP1L2,AGTR1A,AKAP6,ANGPT1,APLN,APLNR,ATP2B4,AXL,BMP4,BMP5,C1QTNF2,C1QTNF9,CAV1,CAV2,CDH5,CERS1,CHRNA3,CLIP3,CNTN1,CSPG4,CTGF,CX3CR1,DAB2,DDR2,DLC1,DLG4,EDNRA,EDNRB,EEF1A2,EFNA5,ENG,EPHA7,F2R,FABP3,FAM129A,FBN1,FERMT2,FGF1,FGF13,FGF18,FGF2,FGF7,FGFR1,FLT1,FLT4,FNDC1,FZD1,GDF10,GDNF,GFRA1,GPRC5B,GRB10,GREM1,HGF,HSPA2,IGF1,ITGB1,KDR,LEPR,LIMCH1,LRRN3,M…
GO:BP	positive regulation of phosphorus metabolic process	GO:0010562	5.08067e-06	5.29408	992	1294	108	21354	ACVRL1,ADCYAP1,ADCYAP1R1,ADGRF5,ADRA2B,ADRA2C,AFAP1L2,AGTR1A,AKAP6,ANGPT1,APLN,APLNR,ATP2B4,AXL,BMP4,BMP5,C1QTNF2,C1QTNF9,CAV1,CAV2,CDH5,CERS1,CHRNA3,CLIP3,CNTN1,CSPG4,CTGF,CX3CR1,DAB2,DDR2,DLC1,DLG4,EDNRA,EDNRB,EEF1A2,EFNA5,ENG,EPHA7,F2R,FABP3,FAM129A,FBN1,FERMT2,FGF1,FGF13,FGF18,FGF2,FGF7,FGFR1,FLT1,FLT4,FNDC1,FZD1,GDF10,GDNF,GFRA1,GPRC5B,GRB10,GREM1,HGF,HSPA2,IGF1,ITGB1,KDR,LEPR,LIMCH1,LRRN3,M…
GO:BP	neurotransmitter secretion	GO:0007269	5.69126e-06	5.24479	178	1294	34	21354	ADCY1,APBA1,BACE1,BRSK1,CACNA1B,CACNB2,CADPS,CHRM2,CHRNA3,CHRNA5,CNR1,CPLX1,DOC2B,KCNC4,LIN7B,NAPB,NCS1,NGF,PPP1R9A,RIMS3,RPH3A,SNAP25,SNCA,SNCAIP,SV2A,SYN1,SYN2,SYP,SYT1,SYT17,SYT4,SYT6,SYT9,TACR2
GO:BP	signal release from synapse	GO:0099643	5.69126e-06	5.24479	178	1294	34	21354	ADCY1,APBA1,BACE1,BRSK1,CACNA1B,CACNB2,CADPS,CHRM2,CHRNA3,CHRNA5,CNR1,CPLX1,DOC2B,KCNC4,LIN7B,NAPB,NCS1,NGF,PPP1R9A,RIMS3,RPH3A,SNAP25,SNCA,SNCAIP,SV2A,SYN1,SYN2,SYP,SYT1,SYT17,SYT4,SYT6,SYT9,TACR2
GO:BP	artery development	GO:0060840	5.80466e-06	5.23622	104	1294	25	21354	ACVRL1,ADGRF5,BMP4,COL3A1,EFEMP2,ENG,FKBP10,FOXF1,GJA5,GLI3,HAND2,HEY2,LOXL1,LTBP1,MYH10,MYLK,MYOCD,NOG,NOTCH3,NRP1,PDGFRB,PKD2,PRICKLE1,TBX2,TGFB2
GO:BP	blood vessel endothelial cell migration	GO:0043534	6.39593e-06	5.1941	128	1294	28	21354	ACVRL1,AMOTL1,ANGPT1,ANXA1,ATP2B4,CDH5,CLEC14A,FGF18,FGF2,FGFR1,GATA2,GREM1,HSPB1,IGF1,ITGB1,KDR,MEOX2,MMRN2,NOS3,NRP1,PRKD1,PTGS2,RHOJ,ROBO1,SLIT2,SOX18,SRPX2,VASH1
GO:BP	sequestering of calcium ion	GO:0051208	6.39593e-06	5.1941	128	1294	28	21354	AKAP6,ANK2,APLNR,CACNA1C,CASQ1,CASQ2,DMD,EDNRA,F2R,FGF2,FKBP1B,JPH2,JPH3,NGF,NOL3,NTSR1,P2RY6,PKD2,PLN,PRKD1,RYR2,SLC25A23,SLC8A1,SNCA,TGFB2,TRDN,TRPC1,XCR1
GO:BP	digestive system development	GO:0055123	6.58549e-06	5.18141	153	1294	31	21354	BMP4,CLMP,COL3A1,DACT1,DCHS1,EDNRB,FAT4,FOXF1,FOXF2,FOXL1,GLI2,GLI3,HLX,HOXA5,IGF1,MYOCD,NKX2-3,NKX3-2,PDGFRA,RBPMS2,SALL1,SFRP1,SMO,SOX10,SOX17,TBX2,TCF21,TGFB2,TGFB3,TIGAR,WLS
GO:BP	calcium-mediated signaling	GO:0019722	6.7502e-06	5.17068	197	1294	36	21354	ACKR3,ACKR4,ADGRB2,ADGRL1,AGTR1A,AKAP6,ANK2,ATP2B4,CACNA1C,CASQ1,CASQ2,CDH13,CX3CR1,DMD,DMPK,DMTN,EDNRB,FKBP1B,HPCA,IGF1,KDR,MAPT,NFATC4,NMUR1,PLN,PPP1R9A,PTGFR,RCAN2,RIT2,RYR2,SELP,SGCD,SLC8A1,SLC8A2,TMEM100,XCR1
GO:BP	response to hypoxia	GO:0001666	6.76503e-06	5.16973	322	1294	49	21354	ACVRL1,AK4,APOLD1,CAV1,CPEB1,CRYAB,CXCL12,CYGB,EDNRA,EIF4EBP1,ENG,FMN2,FNDC1,KCNA5,KCND2,KCNK2,KCNK3,KCNMB1,LOXL2,MMP2,MYOCD,NOL3,NOS1,PAM,PENK,PLAU,PLOD2,POSTN,PTGIS,PTGS2,PTN,RORA,RYR2,S100B,SFRP1,SLC29A1,SLC2A4,SLC8A1,SOD3,STC1,TEK,TGFB2,TGFB3,TGFBR3,TIGAR,TRPC6,TWIST1,VASN,VEGFB
GO:BP	response to chemical	GO:0042221	6.91237e-06	5.16037	5575	1294	430	21354	9330182L06RIK,ABCC9,ABCG4,ACKR1,ACKR3,ACKR4,ACVRL1,ADAMTS7,ADCY1,ADCY5,ADCYAP1,ADCYAP1R1,ADGRA2,ADGRL3,AGTR1A,AHRR,AK4,AKAP12,AKAP6,AMIGO1,ANGPT1,ANK2,ANXA1,AOC3,APBB1,APLN,APOD,ARTN,ASIC2,ASPN,ATP1A2,ATP2B4,AXL,BACE1,BBS1,BDKRB2,BMP4,BMP5,BMPER,BOC,BRSK2,C1QTNF9,C3AR1,C5AR1,CACNA1B,CACNA1G,CACNA1H,CACNB1,CACNG4,CADM4,CALCRL,CALY,CASP12,CASQ1,CASQ2,CAV1,CAV2,CAV3,CCBE1,CCDC141,CCDC3,CD109,CDH13,C…
GO:BP	extracellular matrix assembly	GO:0085029	6.93402e-06	5.15901	44	1294	16	21354	ANTXR1,COL1A2,EFEMP2,EMILIN1,FBLN5,FKBP10,HAS2,LAMB1,LAMB2,LTBP3,MFAP4,MYH11,PHLDB2,RAMP2,THSD4,TNXB
GO:BP	autonomic nervous system development	GO:0048483	7.30971e-06	5.1361	50	1294	17	21354	ADARB1,EDNRA,EDNRB,FN1,GDNF,HAND2,HLX,HOXB2,NRP1,NRP2,PHOX2A,PHOX2B,PLXNA4,SEMA3A,SEMA3F,SOX10,TLX2
GO:BP	respiratory tube development	GO:0030323	7.43419e-06	5.12877	216	1294	38	21354	BMP4,CCBE1,CRISPLD2,CTGF,EIF4EBP1,FGF1,FGF18,FGF2,FGF7,FGFR1,FLT4,FOXF1,FOXP2,FSTL3,GLI2,GLI3,GPC3,HHIP,HOXA5,IGF1,IGFBP5,LAMA1,LTBP3,MYOCD,NOG,NOS3,PDGFRA,PDGFRB,PTK7,PTN,RCN3,RSPO2,SPARC,SPRY1,TCF21,TNC,WNT2B,ZFPM2
GO:BP	protein phosphorylation	GO:0006468	7.55671e-06	5.12167	1669	1294	160	21354	AATK,ACVRL1,ADARB1,ADCYAP1,ADRA2B,ADRA2C,AFAP1L2,AGTR1A,AKAP6,ANGPT1,APLNR,ATP2B4,AXL,BDKRB2,BMP4,BMP5,BMPER,BRSK1,BRSK2,C1QTNF2,C1QTNF9,C5AR1,CADM4,CAMK1G,CAV1,CAV2,CAV3,CD109,CDH5,CDKL5,CERS1,CHRNA3,CLIP3,CNTN1,CSPG4,CTGF,CX3CR1,DAB2,DAPK1,DDR2,DLG4,DMD,DMPK,DMTN,EDNRA,EDNRB,EFEMP1,EFNA5,EMILIN1,ENG,EPHA7,F2R,FAM129A,FAM212B,FBN1,FERMT2,FGF1,FGF13,FGF18,FGF2,FGF7,FGFR1,FGFR2,FLT1,FLT4,FN1,FNDC1…
GO:BP	memory	GO:0007613	7.7739e-06	5.10936	154	1294	31	21354	ADCY1,B4GALT2,BACE1,CNR1,CX3CR1,CYP7B1,DBH,FGF13,GABRB3,GRIA1,IGF1,ITGA8,JPH3,KCNK2,LGMN,MAPT,MUSK,NFATC4,NGF,NOG,PLCB1,PTGS2,PTN,RCAN2,S100B,SHANK3,SLC2A4,SLC8A2,SNAP25,SYT4,TACR1
GO:BP	neural crest cell migration involved in autonomic nervous system development	GO:1901166	8.20824e-06	5.08575	7	1294	7	21354	FN1,GDNF,NRP1,NRP2,PHOX2B,SEMA3A,SEMA3F
GO:BP	adenylate cyclase-activating G protein-coupled receptor signaling pathway	GO:0007189	8.90274e-06	5.05048	138	1294	29	21354	ADCY1,ADCY5,ADCYAP1,ADGRB2,ADGRE1,ADGRG3,ADGRG6,ADGRL1,ADGRL3,ADGRL4,ADRA2C,ATP2B4,CALCRL,CNR1,GALR2,GCGR,GPR161,GPR4,MRAP2,NOS1,OPRL1,PLN,PTGER1,PTGFR,PTGIR,PTH1R,RAMP2,RIT2,SSTR4
GO:BP	digestive tract development	GO:0048565	8.90274e-06	5.05048	138	1294	29	21354	BMP4,CLMP,COL3A1,DACT1,DCHS1,EDNRB,FAT4,FOXF1,FOXF2,FOXL1,GLI2,GLI3,HLX,HOXA5,MYOCD,NKX2-3,NKX3-2,PDGFRA,RBPMS2,SALL1,SFRP1,SMO,SOX10,SOX17,TBX2,TCF21,TGFB2,TGFB3,TIGAR
GO:BP	positive regulation of epithelial cell migration	GO:0010634	9.16189e-06	5.03802	155	1294	31	21354	ADGRA2,AMOTL1,ANGPT1,ANXA1,ATOH8,BMP4,CCBE1,FGF1,FGF18,FGF2,FGF7,FGFR1,FLT4,GATA2,HAS2,HSPB1,IGF1,KDR,LGMN,NOS3,NRP1,PLPP3,PRKD1,PTGS2,RHOJ,SNAI2,SPARC,SRPX2,TACR1,TEK,TGFB2
GO:BP	response to decreased oxygen levels	GO:0036293	1.00513e-05	4.99778	336	1294	50	21354	ACVRL1,AK4,APOLD1,CAV1,CPEB1,CRYAB,CTGF,CXCL12,CYGB,EDNRA,EIF4EBP1,ENG,FMN2,FNDC1,KCNA5,KCND2,KCNK2,KCNK3,KCNMB1,LOXL2,MMP2,MYOCD,NOL3,NOS1,PAM,PENK,PLAU,PLOD2,POSTN,PTGIS,PTGS2,PTN,RORA,RYR2,S100B,SFRP1,SLC29A1,SLC2A4,SLC8A1,SOD3,STC1,TEK,TGFB2,TGFB3,TGFBR3,TIGAR,TRPC6,TWIST1,VASN,VEGFB
GO:BP	regulation of heart rate by cardiac conduction	GO:0086091	1.0319e-05	4.98636	34	1294	14	21354	ANK2,CACNA1C,CACNA1G,CACNB2,CAV1,CTNNA3,GJA5,KCNA5,KCND3,KCNE4,KCNH2,KCNJ5,SCN1B,SCN5A
GO:BP	mesenchyme morphogenesis	GO:0072132	1.03481e-05	4.98514	51	1294	17	21354	ACTA2,ACTG2,ACVRL1,BMP5,DCHS1,ENG,FGFR1,FOXF1,NOG,NOS3,OSR1,SNAI1,SNAI2,TBX2,TGFB2,TMEM100,TWIST1
GO:BP	striated muscle cell development	GO:0055002	1.13138e-05	4.94639	115	1294	26	21354	BMP4,CASQ1,CASQ2,CAV2,CAV3,CFL2,CSRP1,DMD,DNER,DYSF,FHOD3,FLNC,ITGB1,MYH10,MYH11,MYOF,PDGFRA,PDGFRB,PGM5,SGCB,SGCD,SMO,TMOD1,TNNT2,UCHL1,WFIKKN2
GO:BP	release of sequestered calcium ion into cytosol	GO:0051209	1.1359e-05	4.94466	123	1294	27	21354	AKAP6,ANK2,APLNR,CACNA1C,CASQ1,CASQ2,DMD,EDNRA,F2R,FGF2,FKBP1B,JPH2,JPH3,NGF,NOL3,NTSR1,P2RY6,PKD2,PLN,PRKD1,RYR2,SLC8A1,SNCA,TGFB2,TRDN,TRPC1,XCR1
GO:BP	developmental growth involved in morphogenesis	GO:0060560	1.23755e-05	4.90744	258	1294	42	21354	BMP4,CADM1,CDKL5,CXCL12,EFNA5,EPHA7,ESR1,FGF1,FN1,ITGB1,KIF26B,LAMB2,MAP1B,MAPT,MGLL,NDN,NGF,NKD1,NRP1,NRP2,NTN1,OLFM1,PLXNA4,POSTN,PTK7,PTPRS,RARG,RGMA,SEMA3A,SEMA3F,SEMA3G,SFRP1,SLIT2,SLIT3,SMO,SPRY1,SYT1,SYT17,SYT4,TBX2,TNC,TTL
GO:BP	regulation of protein modification process	GO:0031399	1.24937e-05	4.90331	1641	1294	157	21354	ACVRL1,ADARB1,ADCYAP1,ADRA2B,ADRA2C,AFAP1L2,AGTR1A,AKAP6,ANGPT1,APLNR,ATP2B4,BAG2,BDKRB2,BMP4,BMP5,BMPER,C1QTNF2,C1QTNF9,C5AR1,CADM4,CAV1,CAV2,CAV3,CD109,CDH5,CERS1,CHRNA3,CLIP3,CNTN1,CRTAP,CSPG4,CTGF,CX3CR1,DAB2,DDR2,DLC1,DLG4,DMD,DMPK,DMTN,DYSF,EDNRA,EDNRB,EFNA5,EMILIN1,ENG,EPHA7,F2R,FAM107A,FAM129A,FAM212B,FBN1,FBXO2,FERMT2,FGF1,FGF13,FGF18,FGF2,FGF7,FGFR1,FKBP1B,FLT1,FLT4,FN1,FNDC1,FOXF2,FXYD…
GO:BP	cardiac cell development	GO:0055006	1.25621e-05	4.90094	100	1294	24	21354	AKAP6,BMP4,BVES,CAV3,COL14A1,FHOD3,HEY2,IGF1,MYH10,MYH11,MYOCD,PDGFRA,PDGFRB,PI16,POPDC2,PRKG1,RGS4,SGCB,SGCD,SLC25A4,SORBS2,SPEG,SPRY1,WISP1
GO:BP	positive regulation of vasculature development	GO:1904018	1.33186e-05	4.87554	166	1294	32	21354	ACVRL1,APLNR,BMPER,C3AR1,C5AR1,C6,CCBE1,CDH5,CX3CR1,CYP1B1,ECM1,ENG,F3,FGF1,FGF18,FGF2,FLT1,GATA2,GREM1,HGF,HSPB1,HSPB6,ITGB1,KDR,NOS3,NRP1,PRKD1,PTGIS,RAMP2,TEK,TIE1,VEGFB
GO:BP	positive regulation of angiogenesis	GO:0045766	1.33186e-05	4.87554	166	1294	32	21354	ACVRL1,APLNR,BMPER,C3AR1,C5AR1,C6,CCBE1,CDH5,CX3CR1,CYP1B1,ECM1,ENG,F3,FGF1,FGF18,FGF2,FLT1,GATA2,GREM1,HGF,HSPB1,HSPB6,ITGB1,KDR,NOS3,NRP1,PRKD1,PTGIS,RAMP2,TEK,TIE1,VEGFB
GO:BP	vascular endothelial growth factor signaling pathway	GO:0038084	1.33491e-05	4.87455	40	1294	15	21354	ADGRA2,CADM4,CCBE1,DCN,FLT1,FLT4,HSPB1,KDR,NRP1,NRP2,PDGFRA,PDGFRB,PRKD1,ROBO1,VEGFB
GO:BP	negative regulation of sequestering of calcium ion	GO:0051283	1.36929e-05	4.8635	124	1294	27	21354	AKAP6,ANK2,APLNR,CACNA1C,CASQ1,CASQ2,DMD,EDNRA,F2R,FGF2,FKBP1B,JPH2,JPH3,NGF,NOL3,NTSR1,P2RY6,PKD2,PLN,PRKD1,RYR2,SLC8A1,SNCA,TGFB2,TRDN,TRPC1,XCR1
GO:BP	calcium ion transmembrane import into cytosol	GO:0097553	1.38785e-05	4.85766	149	1294	30	21354	AGTR1A,AKAP6,ANK2,APLNR,CACNA1C,CASQ1,CASQ2,DMD,EDNRA,F2R,FAM155A,FGF2,FKBP1B,JPH2,JPH3,NGF,NOL3,NTSR1,P2RY6,PKD2,PLN,PRKD1,RYR2,SLC8A1,SLC8A2,SNCA,TGFB2,TRDN,TRPC1,XCR1
GO:BP	regulation of cell adhesion	GO:0030155	1.44471e-05	4.84022	719	1294	84	21354	ACVRL1,ADAMTS18,ANGPT1,ANXA1,APOD,ARHGAP6,BMP4,CAV1,CCM2L,CDH13,CHRD,COL16A1,COL1A1,COL8A1,CXCL12,CYP1B1,DLC1,DMD,DMTN,DYSF,ECM2,EDIL3,EFNA5,EGFLAM,EMILIN1,EPHA7,FAM107A,FBLN2,FERMT2,FLNA,FN1,FOXF1,FSTL3,GLI3,GPR4,GREM1,HAS2,HLX,HOXA7,HSPB1,IGF1,IGFBP2,ITGB1,JAM2,JAM3,KANK1,KDR,KIF26B,LAMA1,LAMA2,LAMA4,LAMB1,LIMCH1,LIMS2,LRRC32,MMP2,NID1,NPNT,NPY2R,NRP1,PHLDB2,PLAU,PLPP3,PLXNA4,PLXNB3,PODXL,POSTN…
GO:BP	positive regulation of cation channel activity	GO:2001259	1.53678e-05	4.81339	86	1294	22	21354	AKAP6,AMIGO1,ANK2,ASIC2,BMP4,CACNB2,CACNG4,CASQ1,GAL,GALR2,JPH2,KCNC2,LRRC55,NTSR1,P2RY6,PIRT,PKD2,PRKG1,RNF207,SHANK3,STAC,TRDN
GO:BP	positive regulation of cell projection organization	GO:0031346	1.57483e-05	4.80277	425	1294	58	21354	ADAMTS1,ADCYAP1,AMIGO1,APBB1,ATP1B2,BMP4,BMP5,CDC42EP3,CDKL5,CHODL,CNR1,CNTN1,CPEB1,CXCL12,DLG4,DMD,DZIP1,EFEMP1,EFNA5,ELAVL4,EPOR,FEZ1,FGFR1,FKBP1B,FLNA,FN1,FZD1,GPRC5B,HGF,HSPB1,ITGB1,KCTD17,MAP1B,MAPT,NDRG4,NEFL,NEGR1,NGF,NRP1,NTN1,NUMBL,OBSL1,P3H1,PLXNA4,PLXNB3,PPP1R9A,PRKD1,PTK7,PTN,RGMA,RIT2,ROBO1,ROR1,ROR2,SCN1B,SERPINE2,STMN2,ZFP804A
GO:BP	response to oxygen levels	GO:0070482	1.69278e-05	4.7714	362	1294	52	21354	ACVRL1,AK4,APOLD1,CAV1,COL1A1,CPEB1,CRYAB,CTGF,CXCL12,CYGB,EDNRA,EIF4EBP1,ENG,FMN2,FNDC1,KCNA5,KCND2,KCNK2,KCNK3,KCNMB1,LOXL2,MMP2,MYOCD,NOL3,NOS1,PAM,PDGFRB,PENK,PLAU,PLOD2,POSTN,PTGIS,PTGS2,PTN,RORA,RYR2,S100B,SFRP1,SLC29A1,SLC2A4,SLC8A1,SOD3,STC1,TEK,TGFB2,TGFB3,TGFBR3,TIGAR,TRPC6,TWIST1,VASN,VEGFB
GO:BP	cardiac muscle cell development	GO:0055013	1.76154e-05	4.75411	94	1294	23	21354	AKAP6,BMP4,BVES,CAV3,COL14A1,FHOD3,HEY2,IGF1,MYH10,MYH11,MYOCD,PDGFRA,PDGFRB,PI16,POPDC2,PRKG1,RGS4,SGCB,SGCD,SLC25A4,SORBS2,SPEG,WISP1
GO:BP	blood vessel diameter maintenance	GO:0097746	1.77437e-05	4.75095	142	1294	29	21354	ACTA2,ADRA2B,ADRA2C,AGTR1A,APLN,ASIC2,ATP1A2,BDKRB2,CACNA1C,CACNA1G,CAV1,DBH,DOCK4,EDNRA,EDNRB,F2R,GJA1,GJA5,KCNA5,MMP2,MRVI1,NOS1,NOS3,NPY1R,PRKG1,PTGS2,SOD3,TACR1,TBXAS1
GO:BP	regulation of tube diameter	GO:0035296	1.77437e-05	4.75095	142	1294	29	21354	ACTA2,ADRA2B,ADRA2C,AGTR1A,APLN,ASIC2,ATP1A2,BDKRB2,CACNA1C,CACNA1G,CAV1,DBH,DOCK4,EDNRA,EDNRB,F2R,GJA1,GJA5,KCNA5,MMP2,MRVI1,NOS1,NOS3,NPY1R,PRKG1,PTGS2,SOD3,TACR1,TBXAS1
GO:BP	developmental cell growth	GO:0048588	1.97408e-05	4.70464	262	1294	42	21354	AKAP6,CAV3,CDKL5,COL14A1,CXCL12,EFNA5,EPHA7,FN1,IGF1,ITGB1,LAMB2,MAP1B,MAPT,MGLL,MYOCD,NDN,NGF,NRP1,NRP2,NTN1,OLFM1,PI16,PLXNA4,POSTN,PRKG1,PTPRS,RARG,RGMA,RGS4,SEMA3A,SEMA3F,SEMA3G,SLC25A4,SLIT2,SLIT3,SMO,SORBS2,SYT1,SYT17,SYT4,TTL,WISP1
GO:BP	endocardial cushion development	GO:0003197	1.98738e-05	4.70172	41	1294	15	21354	ACVRL1,BMP4,BMP5,DCHS1,ENG,FOXF1,NOG,NOS3,RBM24,SNAI1,SNAI2,TBX2,TGFB2,TMEM100,TWIST1
GO:BP	regulation of cardiac muscle contraction by regulation of the release of sequestered calcium ion	GO:0010881	1.99487e-05	4.70009	10	1294	8	21354	ANK2,CACNA1C,CASQ2,DMD,FKBP1B,PLN,RYR2,SLC8A1
GO:BP	nephron morphogenesis	GO:0072028	2.06296e-05	4.68551	80	1294	21	21354	AGTR1A,BMP4,DCHS1,FAT4,FGF1,FGF2,GDNF,GLI3,GPC3,GREM1,KIF26B,MAGED1,NOG,NPNT,OSR1,PDGFRB,PKD2,SALL1,SMO,TCF21,WNT2B
GO:BP	regulation of tube size	GO:0035150	2.09871e-05	4.67805	143	1294	29	21354	ACTA2,ADRA2B,ADRA2C,AGTR1A,APLN,ASIC2,ATP1A2,BDKRB2,CACNA1C,CACNA1G,CAV1,DBH,DOCK4,EDNRA,EDNRB,F2R,GJA1,GJA5,KCNA5,MMP2,MRVI1,NOS1,NOS3,NPY1R,PRKG1,PTGS2,SOD3,TACR1,TBXAS1
GO:BP	positive regulation of potassium ion transmembrane transport	GO:1901381	2.10373e-05	4.67701	47	1294	16	21354	AKAP6,AMIGO1,ANK2,ATP1B2,DPP6,FLNA,GAL,GALR2,KCNC2,KCNH2,KCNIP2,KCNMB1,LRRC55,OPRK1,PRKG1,RNF207
GO:BP	regulation of MAPK cascade	GO:0043408	2.1094e-05	4.67584	713	1294	83	21354	ACKR3,ACTA2,ADCYAP1,ADRA2B,ADRA2C,AKAP12,ANGPT1,BMP4,BMPER,C1QTNF2,C1QTNF3,C5AR1,CAV1,CAV2,CAV3,CDH2,CSPG4,CTGF,DACT1,DMD,EDAR,EDNRA,EMILIN1,EPHA7,EPOR,ESR1,F2R,FAM83D,FERMT2,FGF1,FGF18,FGF2,FGFR1,FGFR2,FLT1,FLT4,FN1,GPBAR1,GPR37,GPR37L1,HAND2,HGF,IGF1,IGF1R,IGFBP3,IGFBP4,KDR,LEPR,MAGED1,MAP4K5,MAPK8IP1,MAPK8IP2,MTURN,NDRG4,NECAB2,NGF,NPNT,NRP1,OPRK1,P2RY6,PDGFD,PDGFRA,PDGFRB,PELI2,PLCB1,RIT2,ROB…
GO:BP	establishment of localization in cell	GO:0051649	2.24055e-05	4.64965	2048	1294	186	21354	ADCY1,ADCY5,ADCYAP1R1,AGTR1A,AKAP12,AKAP6,ANGPT1,ANK1,ANK2,AP3B2,APBA1,APLNR,APOD,ARHGAP44,ARMCX3,BACE1,BBS1,BBS7,BMP4,BRSK1,BRSK2,BVES,CACNA1B,CACNA1C,CACNA1G,CACNB1,CACNB2,CADPS,CALY,CASQ1,CASQ2,CAV1,CAV3,CDH2,CDH3,CHRM2,CHRNA3,CHRNA5,CNR1,COPZ2,CPLX1,CRYAB,DAB2,DENND2A,DLG2,DMD,DMTN,DNAJC6,DOC2B,EDNRA,EFNA5,EHD2,F2R,FABP3,FAM155A,FAM83D,FEZ1,FGF2,FKBP1B,FLNA,FMN2,FOXF1,GAS1,GATA2,GDAP1,GDNF,GF…
GO:BP	regulation of neurotransmitter transport	GO:0051588	2.25071e-05	4.64768	135	1294	28	21354	ADCY1,APBA1,BACE1,CACNA1B,CACNB2,CHRM2,CHRNA3,CHRNA5,CNR1,CPLX1,GDNF,GFAP,ITGB1,KCNC4,NCS1,NGF,NOS1,PPP1R9A,RAB3B,RIMS3,SLC10A4,SLC18A2,SNCA,SNCAIP,SYP,SYT1,SYT4,TACR2
GO:BP	cell migration involved in heart development	GO:0060973	2.35591e-05	4.62784	17	1294	10	21354	BMP4,BVES,DCHS1,ENG,HAND2,NDRG4,NRP1,PDGFRB,SNAI2,TWIST1
GO:BP	formation of primary germ layer	GO:0001704	2.43365e-05	4.61374	119	1294	26	21354	ATOH8,BMP4,CHRD,COL12A1,COL5A1,COL5A2,COL6A1,COL8A1,FGFR1,FGFR2,FN1,FOXF1,GJA1,HAND1,ITGA7,ITGA8,LAMB1,MMP2,NOG,SNAI1,SOX17,SOX7,TLX2,TWSG1,VTN,WLS
GO:BP	positive regulation of calcium ion transmembrane transport	GO:1904427	2.44035e-05	4.61255	88	1294	22	21354	AGTR1A,AKAP6,ANK2,APLNR,BMP4,CACNA1C,CACNB2,CASQ1,EDNRA,F2R,GJC2,HSPA2,JPH2,NTSR1,P2RY6,PKD2,PLP1,RYR2,SNCA,STAC,TRDN,TRPC1
GO:BP	regulation of cellular component biogenesis	GO:0044087	2.46554e-05	4.60809	971	1294	104	21354	ACVRL1,ADGRB2,ADGRL1,ADGRL3,AMIGO1,ANTXR1,APOD,ARHGAP44,ARHGAP6,ARHGEF15,ARHGEF9,ASIC2,CALY,CAV1,CAV3,CBLN2,CDC42EP3,CDH5,CDKL5,CLIP3,CLSTN2,CLSTN3,COL16A1,CRYAB,CTGF,CTNNA2,DACT1,DLC1,DMTN,DZIP1,EFNA5,EIF4EBP1,EMILIN1,EPHA7,ESR1,FAM107A,FERMT2,FEZ1,FHOD3,FLNA,FLRT2,FMN2,FZD1,GAP43,GJA1,GPBAR1,GPC6,GREM1,HAS2,HSPA2,JAM3,JMY,KANK1,KANK2,KANK4,KCTD17,KDR,KIRREL,LDB2,LIMCH1,LMOD1,LRFN1,LRRC4B,LRRN3,…
GO:BP	regulation of postsynaptic membrane potential	GO:0060078	2.65185e-05	4.57645	153	1294	30	21354	ADCYAP1,CACNA1C,CELF4,CHRNA3,CHRNA5,DLG4,DMPK,GABBR1,GABRB3,GLRB,GRIA1,GRIA3,GRIA4,GRIK3,KCNC4,KCND2,MAPK8IP2,MPP2,NLGN2,NPY2R,NTSR1,P2RX6,PPP1R9A,RGS4,RGS7BP,SEZ6,SHANK3,SLC29A1,SLC8A2,SNCA
GO:BP	gliogenesis	GO:0042063	2.70992e-05	4.56704	346	1294	50	21354	ADAM22,ADCYAP1,ADGRG6,ANXA1,ATP1B2,BMP4,C5AR1,CDH2,CSPG4,CX3CR1,DAAM2,DMD,DNER,EFEMP1,FGF2,FN1,GAP43,GFAP,GJC2,GLI3,GPR37L1,ID4,IGF1,KCNJ10,LAMA2,LAMB1,LAMB2,LAMC3,LEPR,LGI4,MXRA8,NDN,NOG,PENK,PHOX2B,PLP1,PLPP3,PTN,ROR1,ROR2,S100B,SERPINE2,SMO,SOX10,TGFB2,TRPC4,TSPAN2,VTN,WASF3,ZFP365
GO:BP	regulation of cardiac muscle contraction	GO:0055117	2.71291e-05	4.56656	74	1294	20	21354	AKAP6,ANK2,ATP1A2,CACNA1C,CASQ2,CAV1,CAV3,CTGF,CTNNA3,DMD,FGF13,FKBP1B,FXYD1,GJA5,PLN,RYR2,SCN5A,SLC8A1,SMTN,STC1
GO:BP	regulation of cellular localization	GO:0060341	2.88667e-05	4.5396	875	1294	96	21354	ADCY5,ADCYAP1R1,AGTR1A,AKAP6,ANGPT1,ANK2,APLNR,APOD,ARHGAP44,ASTN2,ATP2B4,BC034090,BMP4,BRSK2,BVES,CACNA1C,CALY,CASQ1,CASQ2,CAV1,CAV2,CDH2,CDH3,CLIP3,CRYAB,DAB2,DLG4,DMD,DMTN,DPP10,DPP6,EDNRA,EFNA5,EHD2,F2R,FERMT2,FEZ1,FKBP1B,FLNA,FOXF1,GAS1,GATA2,GLI3,GNAI1,GPC3,GPC6,GPR27,HPCA,ITGB1,JPH2,JPH3,KCNB1,LEPR,MAGED1,MAP1B,MAPT,MRAP2,MUSK,NDRG4,NECAB2,NGF,NKD2,NLGN2,NOL3,NTSR1,P2RY6,PCDH17,PID1,PKD2,P…
GO:BP	regulation of protein metabolic process	GO:0051246	2.89943e-05	4.53769	2627	1294	227	21354	ACVRL1,ADARB1,ADCYAP1,ADRA2B,ADRA2C,AFAP1L2,AGTR1A,AKAP6,ANGPT1,ANTXR1,APLNR,APOD,ATP2B4,BAG2,BBS7,BDKRB2,BMP4,BMP5,BMPER,C1QTNF2,C1QTNF9,C5AR1,CADM4,CASP12,CAV1,CAV2,CAV3,CCBE1,CD109,CDH5,CERS1,CHRNA3,CLIP3,CNTN1,COL28A1,COL6A3,CPEB1,CRTAP,CRYAB,CSPG4,CTGF,CX3CR1,CYP1B1,DAB2,DACT1,DAPK1,DDR2,DLC1,DLG4,DMD,DMPK,DMTN,DYSF,ECM1,EDNRA,EDNRB,EFNA5,EIF4EBP1,ELAVL4,EMILIN1,ENG,EPHA7,F2R,F3,FAM107A,FAM1…
GO:BP	regulation of catalytic activity	GO:0050790	2.97314e-05	4.52678	2277	1294	202	21354	ADARB1,ADCY1,ADCYAP1,ADCYAP1R1,ADRA2B,ADRA2C,AFAP1L2,AGTR1A,AKAP6,ANGPT1,ANTXR1,ANXA1,AOC3,APC2,APH1C,ARHGAP20,ARHGAP23,ARHGAP44,ARHGAP6,ARHGEF15,ATP1B2,ATP2B4,AXL,BAG2,BMP4,BVES,C1QTNF2,C1QTNF9,C5AR1,CACNA1C,CAP2,CASP12,CAV1,CAV2,CAV3,CCDC8,CD109,CD200,CDH3,CDKL5,CERS1,CHN1,CHRNA3,CNR1,COL28A1,COL6A3,CRYAB,CSPG4,CTGF,DAPK1,DDR2,DLC1,DLG2,DLG4,DMPK,DOCK4,ECM1,EEF1A2,EFNA5,ELMOD1,ENG,EPHA7,ESR1,F2…
GO:BP	regulation of striated muscle contraction	GO:0006942	3.05787e-05	4.51458	89	1294	22	21354	AKAP6,ANK2,ATP1A2,CACNA1C,CASQ1,CASQ2,CAV1,CAV3,CTGF,CTNNA3,DMD,DMPK,FGF13,FKBP1B,FXYD1,GJA5,PLN,RYR2,SCN5A,SLC8A1,SMTN,STC1
GO:BP	regulation of nervous system process	GO:0031644	3.28453e-05	4.48353	181	1294	33	21354	ADRA2C,CACNG4,CELF4,DLG4,DMPK,EDNRB,F2R,FGFR1,HGF,IGF1,JAM2,KCNC4,KCNJ10,MGLL,NLGN2,NOS1,NOS3,NPTX1,NPTX2,NPTXR,NPY2R,NTSR1,OPRK1,OPRL1,RGS4,S100B,SCN11A,SHANK3,SHISA6,SLC8A2,SOX10,TMEM100,WASF3
GO:BP	negative regulation of molecular function	GO:0044092	3.29705e-05	4.48187	1166	1294	119	21354	ADARB1,ADCYAP1,ADGRG3,AKAP6,ANXA1,AOC3,ATP1A2,ATP2B4,BAG2,BMP4,CASQ2,CAV1,CAV3,CCDC8,CCM2L,CD109,CD200,CERS1,CNR1,CNRIP1,COL28A1,COL6A3,CRTAC1,CRYAB,CYP1B1,DAB2,DACT1,DKK2,DKK3,DLG2,DYSF,ECM1,ENG,ENHO,ESR1,FAM212B,FKBP1B,FLNA,GABBR1,GALR2,GPC3,HAND1,HAND2,HECW2,HEY2,HGF,HPCA,HSPB1,IGF1,IGF1R,KCNAB1,KCNE4,LEPR,LY6C1,MAPK8IP1,MAPT,MTURN,MYOCD,NDN,NES,NFATC4,NGF,NOG,NOL3,NOS1,NOS3,NR2F2,OAS1D,OPRL1,…
GO:BP	pattern specification process	GO:0007389	3.42198e-05	4.46572	445	1294	59	21354	ACVRL1,BMP4,BMP5,CC2D2A,CHRD,DAAM2,DCHS1,DZIP1L,ENG,FGF1,FGF2,FGFR1,FOXF1,GAS1,GDNF,GJA1,GLI2,GLI3,GPC3,GPR161,GREM1,GREM2,HAND1,HAND2,HEY2,HHIP,HOXA5,HOXA7,HOXB2,HOXC4,HOXC6,HOXC8,HOXC9,HOXD8,MEIS1,MEOX2,NKX3-2,NOG,NR2F2,NRP1,NRP2,OSR1,PKD2,RARG,ROR2,SEMA3A,SEMA3F,SFRP1,SMO,SNAI1,SOX17,SPRY1,STC1,TBX2,TIFAB,WLS,WNT2B,ZBTB16,ZEB1
GO:BP	inner ear development	GO:0048839	3.44256e-05	4.46312	209	1294	36	21354	ALDH1A3,BMP4,BMPER,CXCL14,CYTL1,DCHS1,FAT4,FGFR1,FREM2,FRZB,FZD2,GABRB3,GATA2,GLI2,GLI3,HEY2,HPCA,IGF1,ITGA8,KCNK2,KCNK3,KCNQ4,LHFPL5,LRIG1,NTN1,PDGFRB,PHOX2B,PTK7,ROR1,ROR2,SOBP,SPARC,TGFB2,TGFB3,TIFAB,ZEB1
GO:BP	regulation of smooth muscle contraction	GO:0006940	3.47782e-05	4.45869	68	1294	19	21354	ADRA2B,ADRA2C,ATP1A2,CALCRL,CALD1,CAV1,CHRM2,CHRNA3,DOCK4,F2R,MRVI1,MYOCD,NPNT,NPY2R,PRKG1,PTGS2,TACR1,TACR2,TACR3
GO:BP	mesonephric tubule morphogenesis	GO:0072171	3.47782e-05	4.45869	68	1294	19	21354	AGTR1A,BMP4,DCHS1,FAT4,FGF1,FGF2,GDNF,GLI3,GPC3,GREM1,KIF26B,MAGED1,NOG,NPNT,OSR1,PKD2,SMO,TCF21,WNT2B
GO:BP	regulation of vasoconstriction	GO:0019229	3.49032e-05	4.45713	75	1294	20	21354	ADRA2B,ADRA2C,AGTR1A,APLN,ASIC2,ATP1A2,CACNA1C,CAV1,DBH,DOCK4,F2R,GJA1,GJA5,KCNA5,MMP2,NOS1,NPY1R,PTGS2,TACR1,TBXAS1
GO:BP	positive regulation of synapse assembly	GO:0051965	3.49032e-05	4.45713	75	1294	20	21354	ADGRB2,ADGRL1,ADGRL3,AMIGO1,ASIC2,CBLN2,CLSTN2,CLSTN3,EFNA5,FLRT2,LRRC4B,LRRN3,LRRTM1,MUSK,NLGN2,SLITRK3,SLITRK5,SRPX2,SYNDIG1,THBS2
GO:BP	regulation of response to wounding	GO:1903034	3.74991e-05	4.42598	164	1294	31	21354	ACTA2,ADAMTS18,ANXA1,CADM4,CAV1,CD109,DMTN,F2R,FERMT2,FGF2,FKBP1B,FLNA,GJA1,ITGB1,KANK1,MYLK,PDGFRA,PHLDB2,PLAU,PLPP3,PRKG1,PROS1,PTN,PTPRS,RGMA,SERPINE2,SERPING1,THBD,VEGFB,WFDC1,WISP1
GO:BP	negative regulation of canonical Wnt signaling pathway	GO:0090090	4.01601e-05	4.39621	130	1294	27	21354	APC2,CAV1,CDH2,DAB2,DACT1,DACT3,DKK2,DKK3,FRZB,FZD1,GLI3,GPC3,GREM1,NKD1,NKD2,NOG,PRICKLE1,PTPRU,RBMS3,ROR2,SFRP1,SHISA6,SNAI2,SOX10,SOX17,TMEM88,WWTR1
GO:BP	regulation of release of sequestered calcium ion into cytosol by sarcoplasmic reticulum	GO:0010880	4.08802e-05	4.38849	22	1294	11	21354	ANK2,CACNA1C,CASQ1,CASQ2,DMD,FKBP1B,NOL3,PLN,RYR2,SLC8A1,TRDN
GO:BP	regulation of BMP signaling pathway	GO:0030510	4.14395e-05	4.38259	98	1294	23	21354	9330182L06RIK,ACVRL1,BMP4,BMPER,CAV1,CDH5,CHRD,CHRDL1,ENG,FBN1,FSTL1,FSTL3,FZD1,GPC3,GREM1,GREM2,HTRA3,NOG,RBPMS2,RGMA,SFRP1,TWSG1,ZFP423
GO:BP	cytoskeleton organization	GO:0007010	4.43987e-05	4.35263	1406	1294	137	21354	ABLIM2,ABLIM3,AMOTL1,ANK2,ANTXR1,ANXA1,APC2,ARHGAP44,ARHGAP6,ARHGEF15,ARHGEF17,BBS1,BC034090,BRSK1,BRSK2,CALD1,CAP2,CASQ1,CASQ2,CAV1,CAV3,CC2D2A,CCDC65,CCDC8,CDC42EP3,CDH5,CFL2,CLIP3,CLIP4,CNN1,CRYAB,CSRP1,CTGF,CTNNA2,DAAM2,DES,DLC1,DMTN,DNAL1,EFNA5,EFS,EHD2,EML1,ENAH,FAM107A,FERMT2,FGD1,FGF13,FGF7,FHOD3,FLNA,FMN2,FRMD6,GAS2L2,GFAP,GJA1,GNAI1,HIP1,INA,ITGB1,JAM3,JMY,KANK1,KANK2,KANK4,KIRREL,KRT17…
GO:BP	AV node cell to bundle of His cell communication	GO:0086067	4.51913e-05	4.34495	14	1294	9	21354	ANK2,CACNA1C,CACNA1G,CACNB2,GJA5,GJC1,GJD3,RYR2,SCN5A
GO:BP	negative regulation of ion transport	GO:0043271	4.71924e-05	4.32613	373	1294	52	21354	ADCYAP1,ANGPT1,ANXA1,APOD,ATP1A2,CASQ2,CAV1,CAV3,CD200,CNR1,DMTN,DYSF,ENHO,ESR1,F2R,FKBP1B,FRMD4A,GABBR1,GNAO1,GRB10,HECW2,IGFBP3,IRS1,KCNAB1,KCNB1,KCNE4,KCNH2,NOL3,NOS1,NOS3,NTSR1,OPRL1,OSR1,PID1,PKD2,PKIA,PLCB4,PLN,PRKG1,PTGS2,RAB11FIP5,RAB23,REM1,RGS4,SERPINE2,SFRP1,SNCA,STC1,SYT4,TGFB2,TRDN,TWIST1
GO:BP	metanephros development	GO:0001656	4.74962e-05	4.32334	91	1294	22	21354	APH1C,BMP4,FAT4,FBN1,GDNF,GLI3,GPC3,GREM1,ITGA8,KIF26B,LAMB2,OSR1,PDGFRA,PDGFRB,PKD2,SALL1,SLIT2,SMO,SOX17,SPRY1,TCF21,WWTR1
GO:BP	cranial nerve morphogenesis	GO:0021602	4.80467e-05	4.31834	27	1294	12	21354	ADARB1,DMD,GLI3,HOXB2,KCNA2,NRP1,NRP2,PHOX2A,PLXNA4,SEMA3A,SEMA3F,TIFAB
GO:BP	gastrulation	GO:0007369	4.8663e-05	4.3128	193	1294	34	21354	APLN,APLNR,ATOH8,BMP4,CHRD,COL12A1,COL5A1,COL5A2,COL6A1,COL8A1,DACT1,FGFR1,FGFR2,FN1,FOXF1,GJA1,GPC3,HAND1,ITGA7,ITGA8,LAMB1,MMP2,NOG,OSR1,PHLDB2,PLPP3,SFRP1,SNAI1,SOX17,SOX7,TLX2,TWSG1,VTN,WLS
GO:BP	negative regulation of Wnt signaling pathway	GO:0030178	4.9406e-05	4.30622	157	1294	30	21354	APC2,CAV1,CDH2,DAB2,DACT1,DACT3,DKK2,DKK3,FRZB,FZD1,GLI3,GPC3,GRB10,GREM1,NFATC4,NKD1,NKD2,NOG,NXN,PRICKLE1,PTPRU,RBMS3,ROR2,SFRP1,SHISA6,SNAI2,SOX10,SOX17,TMEM88,WWTR1
GO:BP	embryo development ending in birth or egg hatching	GO:0009792	5.03874e-05	4.29768	787	1294	88	21354	ACVRL1,ADGRF5,ANGPT1,APBA1,BMP4,BMP5,C6,CC2D2A,CELF4,CERS1,COL1A1,COLEC10,DACT1,DCHS1,DSC3,DZIP1L,EDNRA,ENAH,EPN2,EXOC3L2,FGF2,FGFR1,FGFR2,FKBP10,FOXF1,FZD1,FZD2,GAS1,GATA2,GJA1,GLI2,GLI3,GPR161,HAND1,HAND2,HEY2,HOXA5,HOXA7,HOXB2,HOXC4,HOXC6,HOXC9,IGF1,ITGB1,MEOX2,MMP16,MYH10,NECAB1,NKX3-2,NOG,NOS3,NR2F2,NXN,OSR1,PCDH12,PDGFRA,PDGFRB,PKD2,PRICKLE1,PTH1R,PTK7,RARG,RESP18,RGMA,ROR2,RSPO3,SFRP1,SLC5…
GO:BP	stem cell differentiation	GO:0048863	5.73579e-05	4.24141	213	1294	36	21354	BMP4,CDH2,EDNRA,EDNRB,ESR1,FGF2,FN1,FRZB,FZD1,GDNF,GREM1,HAND2,HOXA7,LTBP3,MYOCD,NRP1,NRP2,OSR1,PDGFRA,PHOX2B,PRICKLE1,PTN,RBM24,SEMA3A,SEMA3F,SEMA3G,SFRP1,SHC4,SMO,SNAI2,SOX10,SOX17,SOX18,TBX2,TGFB2,TWIST1
GO:BP	gland development	GO:0048732	6.08716e-05	4.21559	508	1294	64	21354	ADCYAP1,AK4,ALDH1A3,ANXA1,BMP4,CADM1,CAV1,CAV3,CYP7B1,EDA,EDAR,ESR1,FGF1,FGF18,FGF2,FGF7,FGFR1,FOXF1,FRZB,FSTL3,GATA2,GJA1,GLI2,GLI3,HAND2,HGF,HLX,HOXA5,ID4,IGF1,IGFBP5,LAMA1,LIMS2,MMP2,NKX2-3,NOG,NRP1,NTN1,PAM,PDGFRA,PDGFRB,PKD2,PLAU,PTN,RARG,ROBO1,SALL1,SEMA3A,SERPINE2,SFRP1,SLC29A1,SLIT2,SMO,SNAI2,SOX10,TBX2,TCF21,TGFB2,TGFB3,TNC,TWSG1,VTN,WDR35,WLS
GO:BP	kidney vasculature morphogenesis	GO:0061439	6.22018e-05	4.2062	8	1294	7	21354	BMP4,NOTCH3,NRP1,PDGFRA,PDGFRB,PKD2,TCF21
GO:BP	renal system vasculature morphogenesis	GO:0061438	6.22018e-05	4.2062	8	1294	7	21354	BMP4,NOTCH3,NRP1,PDGFRA,PDGFRB,PKD2,TCF21
GO:BP	amine transport	GO:0015837	6.26543e-05	4.20305	116	1294	25	21354	CHRNA3,CNR1,CXCL12,GABBR1,GDNF,ITGB1,KCNA2,KCNB1,NPY2R,NTSR1,OPRK1,PRKG1,RAB3B,RGS4,SLC18A2,SNCA,SV2A,SYT1,SYT13,SYT15,SYT17,SYT4,SYT6,SYT9,TACR2
GO:BP	regulation of amine transport	GO:0051952	6.35219e-05	4.19708	108	1294	24	21354	CHRNA3,CNR1,CXCL12,GABBR1,GDNF,ITGB1,KCNA2,KCNB1,NPY2R,NTSR1,OPRK1,PRKG1,RAB3B,RGS4,SNCA,SV2A,SYT1,SYT13,SYT15,SYT17,SYT4,SYT6,SYT9,TACR2
GO:BP	adult behavior	GO:0030534	6.75697e-05	4.17025	168	1294	31	21354	ADAM22,ATP1A2,BBS1,CACNA1C,CHL1,CHRNA3,CHRNA5,CNTNAP2,CXCL12,DBH,GLRB,KCNJ10,LGI4,MAPT,NGF,NLGN2,NOS1,NTSR1,OPRK1,PBX3,PCDH17,PREX2,SDK1,SEZ6,SEZ6L,SHANK3,SLC10A4,SLITRK5,SNCA,TMOD1,UCHL1
GO:BP	elastic fiber assembly	GO:0048251	6.92334e-05	4.15968	11	1294	8	21354	EFEMP2,EMILIN1,FBLN5,LTBP3,MFAP4,MYH11,THSD4,TNXB
GO:BP	cardiac muscle cell membrane repolarization	GO:0099622	7.11863e-05	4.1476	33	1294	13	21354	CAV3,FLNA,GJA1,GJA5,KCNA5,KCND3,KCNE4,KCNH2,KCNJ5,KCNJ8,RNF207,SCN1B,SCN5A
GO:BP	regulation of wound healing	GO:0061041	7.16685e-05	4.14467	125	1294	26	21354	ACTA2,ADAMTS18,ANXA1,CADM4,CAV1,CD109,DMTN,F2R,FERMT2,FGF2,GJA1,ITGB1,KANK1,MYLK,PDGFRA,PHLDB2,PLAU,PLPP3,PRKG1,PROS1,SERPINE2,SERPING1,THBD,VEGFB,WFDC1,WISP1
GO:BP	nephron epithelium morphogenesis	GO:0072088	7.22751e-05	4.14101	78	1294	20	21354	AGTR1A,BMP4,DCHS1,FAT4,FGF1,FGF2,GDNF,GLI3,GPC3,GREM1,KIF26B,MAGED1,NOG,NPNT,OSR1,PKD2,SALL1,SMO,TCF21,WNT2B
GO:BP	positive regulation of endothelial cell proliferation	GO:0001938	7.2761e-05	4.1381	93	1294	22	21354	ACVRL1,AGTR1A,APLN,APLNR,BMP4,CAV1,CAV2,CDH13,CXCL12,DYSF,ECM1,F3,FGF2,FGFR1,FLT4,GATA2,IGF1,KDR,PLXNB3,PRKD1,SCG2,VEGFB
GO:BP	glomerulus vasculature development	GO:0072012	7.94422e-05	4.09995	28	1294	12	21354	ACTA2,ANGPT1,BMP4,C3AR1,GPR4,NOTCH3,OSR1,PDGFD,PDGFRA,PDGFRB,TCF21,TEK
GO:BP	chordate embryonic development	GO:0043009	8.2209e-05	4.08508	771	1294	86	21354	ACVRL1,ADGRF5,ANGPT1,APBA1,BMP4,BMP5,C6,CC2D2A,CELF4,CERS1,COL1A1,DACT1,DCHS1,DSC3,DZIP1L,EDNRA,ENAH,EPN2,EXOC3L2,FGFR1,FGFR2,FKBP10,FOXF1,FZD1,FZD2,GAS1,GATA2,GJA1,GLI2,GLI3,GPR161,HAND1,HAND2,HEY2,HOXA5,HOXA7,HOXB2,HOXC4,HOXC6,HOXC9,IGF1,ITGB1,MEOX2,MMP16,MYH10,NECAB1,NKX3-2,NOG,NOS3,NR2F2,NXN,OSR1,PCDH12,PDGFRA,PDGFRB,PKD2,PRICKLE1,PTH1R,PTK7,RARG,RESP18,RGMA,ROR2,RSPO3,SFRP1,SLC5A7,SLIT2,SMO,…
GO:BP	positive regulation of cell-substrate adhesion	GO:0010811	8.5163e-05	4.06975	126	1294	26	21354	CDH13,COL16A1,COL8A1,DMD,DMTN,ECM2,EDIL3,EGFLAM,EMILIN1,FBLN2,FERMT2,FLNA,FN1,FOXF1,HAS2,ITGB1,KDR,LIMS2,NID1,NPNT,NPY2R,NRP1,PTN,SPOCK2,TEK,VTN
GO:BP	response to lipid	GO:0033993	8.57434e-05	4.0668	982	1294	103	21354	ADCY1,ADCY5,ADCYAP1,ADCYAP1R1,AGTR1A,AKAP12,ANXA1,ATP1A2,AXL,BMP4,CACNA1B,CAV1,CNGA3,CNR1,COL1A1,CPEB1,CRYAB,CTGF,CX3CR1,CYP7B1,DAB2,DCN,DHH,EDNRA,EDNRB,EFNA5,EIF4EBP1,ESR1,F2R,FABP3,FAM107A,FGFR2,FIBIN,FOXP2,GATA2,GDAP1,GDNF,GJA1,GNAI1,GPBAR1,HNMT,IGF1,IGFBP2,IGFBP7,KANK2,KCNJ8,KCNMB1,LOXL1,MAP1B,MMP2,MN1,NEFL,NFATC4,NOS1,NOS3,NR2F2,NTSR1,OPRK1,OPRL1,OSR1,PAM,PAPPA,PDGFRB,PENK,PID1,PLCB1,PLN,POS…
GO:BP	response to mechanical stimulus	GO:0009612	8.72283e-05	4.05934	226	1294	37	21354	ASIC2,ATP1A2,BACE1,CAV1,CAV3,CNTNAP2,COL1A1,COL3A1,CXCL12,DCN,DMD,EDNRA,ETV1,FOXP2,GJA1,IGF1,IGFBP2,KCNA5,KCNK2,LHFPL5,MAP1B,MMP2,NOS1,NOS3,PHF24,PIEZO2,PKD2,POSTN,PTGS2,PTN,RYR2,SERPINE2,SHANK3,SLC8A1,TACR1,TIFAB,TNC
GO:BP	regulation of blood pressure	GO:0008217	8.88828e-05	4.05118	207	1294	35	21354	ACTA2,ACVRL1,ADRA2B,AGTR1A,AOC3,APLN,ASIC2,ATP1A2,BDKRB2,C3AR1,CACNA1B,CACNA1C,CNR1,COL1A2,EDNRA,EDNRB,ENG,F2R,GJA1,GJA5,GPR37L1,NOS1,NOS3,NPY1R,NR2F2,NTSR1,OPRL1,POSTN,PTGS2,RAMP2,RASL10B,SMTN,TACR1,TACR3,TPM1
GO:BP	response to organonitrogen compound	GO:0010243	8.95761e-05	4.04781	1097	1294	112	21354	ABCC9,ADCY5,ADGRL3,AGTR1A,AKAP6,AMIGO1,ANXA1,ATP2B4,BACE1,BRSK2,C1QTNF9,C5AR1,CACNA1B,CACNB1,CACNG4,CALY,CASQ2,CAV1,CAV2,CAV3,CDH13,CHRM2,CNGA3,CNR1,COL16A1,COL1A1,COL1A2,COL3A1,COL5A2,COL6A1,CPEB1,CTGF,CXCL12,DBH,DLG4,DMTN,EDNRA,EDNRB,EIF4EBP1,ELAVL4,ENHO,FABP3,FBN1,FBXO2,FLNA,GABRB3,GAL,GCGR,GJA1,GLP2R,GLRB,GNAO1,GPR173,GRB10,GRB14,HNMT,HPCA,HTR3A,HTR3B,IGF1,IGF1R,IGFBP5,IRS1,ITGB1,KANK1,KCNC2,…
GO:BP	parasympathetic nervous system development	GO:0048486	0.00010004	3.99983	19	1294	10	21354	ADARB1,GDNF,HOXB2,NRP1,NRP2,PHOX2A,PHOX2B,PLXNA4,SEMA3A,SEMA3F
GO:BP	sensory organ morphogenesis	GO:0090596	0.000101154	3.99502	287	1294	43	21354	ALDH1A3,BMP4,CFH,CNGA3,COL5A1,COL5A2,COL8A1,COL8A2,EFEMP1,FBN1,FGF2,FGFR1,FJX1,FOXF2,FRZB,FZD2,GAS1,GATA2,GLI2,GLI3,ITGA8,KCNQ4,LHFPL5,LRIG1,MEIS1,MFAP2,NKX3-2,NOG,NTN1,OBSL1,OSR1,PTK7,PTN,PTPRM,RARG,ROR2,SDK1,SDK2,SOBP,TBX2,TIFAB,TWIST1,ZEB1
GO:BP	positive regulation of molecular function	GO:0044093	0.000103437	3.98533	1734	1294	160	21354	ADCY1,ADCYAP1,ADCYAP1R1,ADRA2B,ADRA2C,AFAP1L2,AGTR1A,AKAP6,AMIGO1,ANGPT1,ANK2,ANTXR1,APC2,APH1C,ARHGAP20,ARHGAP23,ARHGAP44,ARHGAP6,ARHGEF15,ASIC2,ATP1B2,ATP2B4,AXL,BEX2,BMP4,C1QTNF2,C1QTNF9,CACNA1C,CACNB2,CACNG4,CALD1,CASP12,CASQ1,CAV1,CAV2,CD200,CDH3,CDKL5,CHN1,CHRNA3,CSPG4,CTGF,CX3CR1,CYTL1,DACT1,DAPK1,DDR2,DLC1,DLG4,DMD,DOCK4,EDA,EEF1A2,ELMOD1,EPHA7,ESR1,F2R,F3,FBN1,FERMT2,FGF1,FGF13,FGF18,FGF…
GO:BP	regulation of anion transport	GO:0044070	0.00011248	3.94893	912	1294	97	21354	ADCY5,ADCYAP1,AGTR1A,ANGPT1,ANXA1,AOC3,APBB1,APLN,APOD,ARHGAP44,BMP4,BRSK2,C1QTNF2,C1QTNF3,CAV1,CD200,CHRNA3,CLIP3,CNR1,CXCL12,DMTN,DOC2B,EDNRA,EFNA5,ENHO,ESR1,F2R,FABP3,FGFR1,FKBP1B,FLNA,FNDC1,FRMD4A,FXYD1,GABBR1,GAL,GDNF,GJA1,GJA5,GLI3,GPC3,GPR27,GRB10,HPCA,IGF1,IGFBP3,IRS1,ITGB1,KCNA2,KCNB1,LEPR,MYH10,MYOM1,NLGN2,NOL3,NOS1,NPY2R,NTSR1,OPRK1,OSR1,P3H1,PAM,PFKM,PID1,PKIA,PLA2R1,PRKD1,PRKG1,PTGES…
GO:BP	positive regulation of nervous system development	GO:0051962	0.000118002	3.92811	330	1294	47	21354	ADGRB2,ADGRL1,ADGRL3,AMIGO1,ASIC2,CBLN2,CDKL5,CHODL,CLSTN2,CLSTN3,CX3CR1,CXCL12,EFNA5,FLRT2,FN1,GFAP,GJC2,GLI3,IGF1,LRRC4B,LRRN3,LRRTM1,MAP1B,MAPT,MUSK,NEFL,NGF,NLGN2,NOG,NRP1,NTN1,NUMBL,OBSL1,PLXNA4,PLXNB3,PTN,ROBO1,SERPINE2,SHANK3,SLITRK3,SLITRK5,SMO,SOX10,SRPX2,SYNDIG1,THBS2,ZFP365
GO:BP	positive regulation of phosphorylation	GO:0042327	0.000118636	3.92578	913	1294	97	21354	ACVRL1,ADCYAP1,ADRA2B,ADRA2C,AFAP1L2,AGTR1A,AKAP6,ANGPT1,APLN,APLNR,ATP2B4,AXL,BMP4,BMP5,C1QTNF2,C1QTNF9,CAV1,CAV2,CERS1,CHRNA3,CLIP3,CNTN1,CSPG4,CTGF,CX3CR1,DAB2,DDR2,DLG4,EDNRA,EDNRB,EEF1A2,EFNA5,ENG,EPHA7,F2R,FAM129A,FBN1,FERMT2,FGF1,FGF13,FGF18,FGF2,FGF7,FGFR1,FLT1,FLT4,FNDC1,FZD1,GDF10,GDNF,GFRA1,GPRC5B,GRB10,GREM1,HGF,HSPA2,IGF1,ITGB1,KDR,LEPR,LIMCH1,LRRN3,MAGED1,MAP4K5,MAPK8IP2,MMD2,MUSK,N…
GO:BP	mesenchymal cell proliferation	GO:0010463	0.000120283	3.9198	46	1294	15	21354	BMP4,CHRD,DCHS1,FAT4,FGF7,FGFR1,FOXF1,FOXP2,GAS1,GPC3,HAND2,OSR1,PTN,SMO,ZEB1
GO:BP	dopamine secretion	GO:0014046	0.000121995	3.91366	40	1294	14	21354	CNR1,CXCL12,GABBR1,KCNA2,NPY2R,OPRK1,SNCA,SYT1,SYT13,SYT15,SYT17,SYT4,SYT6,SYT9
GO:BP	regulation of dopamine secretion	GO:0014059	0.000121995	3.91366	40	1294	14	21354	CNR1,CXCL12,GABBR1,KCNA2,NPY2R,OPRK1,SNCA,SYT1,SYT13,SYT15,SYT17,SYT4,SYT6,SYT9
GO:BP	cardiac septum morphogenesis	GO:0060411	0.000123566	3.9081	73	1294	19	21354	BMP4,BMP5,ENG,FZD1,FZD2,GJA5,HAND1,HEY2,NOG,NOS3,NRP1,NRP2,PARVA,SLIT2,SLIT3,SMO,TBX2,TGFB2,ZFPM2
GO:BP	cell-matrix adhesion	GO:0007160	0.000129075	3.88916	210	1294	35	21354	ACVRL1,APOD,ARHGAP6,CDH13,COL16A1,COL3A1,COL5A3,CTGF,DLC1,DMD,DMTN,EDA,EFNA5,EMILIN1,FAM107A,FERMT2,FN1,GREM1,HOXA7,ITGA11,ITGA8,ITGB1,JAM3,KDR,LIMCH1,NID1,NPNT,NRP1,PHLDB2,PLAU,POSTN,TEK,TMEM8B,TNXB,VTN
GO:BP	smooth muscle cell migration	GO:0014909	0.000134631	3.87085	96	1294	22	21354	ADAMTS1,CYP1B1,DOCK4,GRB10,HAS2,IGF1,IGFBP3,IGFBP5,MYOCD,NDRG4,P2RY6,PARVA,PDGFD,PDGFRB,PLAU,POSTN,PRKG1,SLIT2,SMO,TACR1,VTN,WISP1
GO:BP	kidney morphogenesis	GO:0060993	0.000134631	3.87085	96	1294	22	21354	AGTR1A,BMP4,DCHS1,FAT4,FGF1,FGF2,GDNF,GLI3,GPC3,GREM1,KIF26B,MAGED1,NOG,NPNT,OSR1,PDGFRB,PKD2,SALL1,SMO,TCF21,WNT2B,WWTR1
GO:BP	smooth muscle cell differentiation	GO:0051145	0.00015688	3.80443	74	1294	19	21354	BMP4,CFH,EDNRB,ENG,FOXF1,HEY2,ITGA8,MYOCD,NFATC4,NPNT,OLFM2,PDGFRB,PRDM6,RAMP2,RBPMS2,SGCB,TBX2,TMEM204,ZEB1
GO:BP	branching involved in ureteric bud morphogenesis	GO:0001658	0.000161227	3.79256	60	1294	17	21354	AGTR1A,BMP4,DCHS1,FAT4,FGF1,FGF2,GDNF,GLI3,GPC3,GREM1,MAGED1,NOG,NPNT,PKD2,SMO,TCF21,WNT2B
GO:BP	ureteric bud morphogenesis	GO:0060675	0.000163671	3.78603	67	1294	18	21354	AGTR1A,BMP4,DCHS1,FAT4,FGF1,FGF2,GDNF,GLI3,GPC3,GREM1,KIF26B,MAGED1,NOG,NPNT,PKD2,SMO,TCF21,WNT2B
GO:BP	actomyosin structure organization	GO:0031032	0.000176827	3.75245	203	1294	34	21354	ARHGAP6,ARHGEF15,CASQ1,CASQ2,CAV3,CFL2,CNN1,CSRP1,CTGF,DLC1,FERMT2,FHOD3,FRMD6,ITGB1,KANK2,KANK4,LIMCH1,LURAP1,MYH10,NRP1,PDGFRA,PDGFRB,PDLIM4,PGM5,PHACTR1,PHLDB2,PPM1E,PPP1R9A,SORBS3,TACR1,TGFB3,TMOD1,TNNT2,TPM1
GO:BP	cellular component assembly	GO:0022607	0.000184943	3.73296	2729	1294	230	21354	ABLIM2,ABLIM3,ACVRL1,ADGRB2,ADGRL1,ADGRL3,ADGRL4,ALDH1A3,AMIGO1,ANGPT1,ANK2,ANTXR1,APBA1,APOD,ARHGAP44,ARHGAP6,ARHGEF15,ARHGEF9,ASIC2,ATL1,BBS1,BBS7,CADM1,CADPS,CALD1,CALY,CASQ1,CASQ2,CAV1,CAV2,CAV3,CBLN2,CC2D2A,CCDC65,CDC42EP3,CDH11,CDH13,CDH19,CDH2,CDH5,CDH6,CDKL5,CDS2,CELF4,CELF6,CFL2,CHRNA3,CLIP3,CLSTN2,CLSTN3,CNTN5,COL16A1,COL1A2,CPEB1,CRYAB,CSPG4,CSRP1,CTGF,CTNNA2,CXCL12,DACT1,DCHS1,DLC1,DL…
GO:BP	cardiac ventricle development	GO:0003231	0.00019583	3.70812	131	1294	26	21354	BMP4,CCM2L,ENG,EPOR,FOXF1,FZD1,FZD2,GJA5,HAND1,HAND2,HEY2,KCNK2,LTBP1,MYOCD,NOG,NOS3,NPY2R,PTK7,RYR2,SCN5A,SLIT2,SLIT3,TGFB2,TNNT2,TPM1,ZFPM2
GO:BP	cranial nerve structural organization	GO:0021604	0.0001966	3.70642	12	1294	8	21354	DMD,HOXB2,KCNA2,NRP1,NRP2,PLXNA4,SEMA3A,SEMA3F
GO:BP	nephron tubule morphogenesis	GO:0072078	0.000198265	3.70275	75	1294	19	21354	AGTR1A,BMP4,DCHS1,FAT4,FGF1,FGF2,GDNF,GLI3,GPC3,GREM1,KIF26B,MAGED1,NOG,NPNT,OSR1,PKD2,SMO,TCF21,WNT2B
GO:BP	positive regulation of protein phosphorylation	GO:0001934	0.000203768	3.69086	836	1294	90	21354	ACVRL1,ADCYAP1,ADRA2B,ADRA2C,AFAP1L2,AGTR1A,AKAP6,ANGPT1,APLNR,ATP2B4,BMP4,BMP5,C1QTNF2,C1QTNF9,CAV1,CAV2,CERS1,CHRNA3,CLIP3,CNTN1,CSPG4,CTGF,CX3CR1,DAB2,DDR2,DLG4,EDNRA,EDNRB,EFNA5,ENG,EPHA7,F2R,FAM129A,FBN1,FERMT2,FGF1,FGF13,FGF18,FGF2,FGF7,FGFR1,FLT1,FLT4,FNDC1,FZD1,GDF10,GDNF,GFRA1,GPRC5B,GREM1,HGF,HSPA2,IGF1,ITGB1,KDR,LEPR,LIMCH1,LRRN3,MAGED1,MAP4K5,MAPK8IP2,MMD2,MUSK,NGF,NOS1,NRP1,PDGFD,PDG…
GO:BP	release of sequestered calcium ion into cytosol by sarcoplasmic reticulum	GO:0014808	0.000218093	3.66136	25	1294	11	21354	ANK2,CACNA1C,CASQ1,CASQ2,DMD,FKBP1B,NOL3,PLN,RYR2,SLC8A1,TRDN
GO:BP	regulation of developmental growth	GO:0048638	0.00022436	3.64905	380	1294	51	21354	AKAP6,BMP4,CACNA1C,CAV3,CDKL5,COL14A1,CXCL12,EFNA5,EPHA7,FGF2,FGFR1,FN1,GJA1,HEY2,HLX,IGF1,KCNK2,LGMN,MAP1B,MAPT,MEIS1,MGLL,MUSK,NGF,NKD1,NOG,NPY1R,NRP1,NTN1,OLFM1,PI16,PLCB1,PLXNA4,PTPRS,RGMA,RGS4,SEMA3A,SEMA3F,SEMA3G,SGIP1,SLC25A4,SLIT2,SMO,SYT1,SYT17,SYT4,TBX2,TTL,WISP1,WWC2,ZFPM2
GO:BP	atrial cardiac muscle cell action potential	GO:0086014	0.00023109	3.63622	16	1294	9	21354	ANK2,CACNA1C,CACNB2,FLNA,GJA5,KCNA5,KCNJ5,RYR2,SCN5A
GO:BP	atrial cardiac muscle cell to AV node cell communication	GO:0086066	0.00023109	3.63622	16	1294	9	21354	ANK2,CACNA1C,CACNB2,FLNA,GJA5,KCNA5,KCNJ5,RYR2,SCN5A
GO:BP	atrial cardiac muscle cell to AV node cell signaling	GO:0086026	0.00023109	3.63622	16	1294	9	21354	ANK2,CACNA1C,CACNB2,FLNA,GJA5,KCNA5,KCNJ5,RYR2,SCN5A
GO:BP	neuron migration	GO:0001764	0.000235477	3.62805	177	1294	31	21354	ADGRL3,APBB1,ASTN1,ASTN2,AXL,BBS1,CDKL5,CHL1,COL3A1,CTNNA2,CXCL12,FLNA,FLRT2,GATA2,GJA1,GPR173,IGSF10,IL1R1,MAPT,MARK1,MYH10,NDN,NR2F2,NRP1,NRP2,NTN1,PHACTR1,PHOX2B,PRKG1,SEMA3A,TWIST1
GO:BP	positive regulation of intracellular signal transduction	GO:1902533	0.000236309	3.62652	964	1294	100	21354	ACKR3,ACTA2,ADCYAP1,ADCYAP1R1,ADRA2B,ADRA2C,AKAP12,AKAP6,ANGPT1,AXL,BMP4,BMPER,C1QTNF2,C1QTNF3,C5AR1,CAV1,CAV2,CDH13,CDH2,COL3A1,CSPG4,CTGF,CX3CR1,DCN,EDA,EDAR,EDNRA,ENG,EPOR,ESR1,F2R,F3,FERMT2,FGF1,FGF18,FGF2,FGFR1,FGFR2,FLNA,FLT1,FLT4,GPBAR1,GPR20,GPR37,GPR37L1,GPR4,GPRC5B,GREM1,HAND2,HGF,IGF1,IGFBP3,IGFBP4,IGFBP5,ITGB1,KDR,LEPR,LURAP1,MAGED1,MAP4K5,MAPK8IP1,MAPK8IP2,MMD2,MRAP2,MTURN,NDRG4,NECA…
GO:BP	regulation of membrane repolarization	GO:0060306	0.000241885	3.61639	36	1294	13	21354	AKAP6,CASQ2,CAV1,CAV3,FLNA,GJA1,GJA5,KCNA5,KCNE4,KCNH2,RNF207,SCN1B,SCN5A
GO:BP	artery morphogenesis	GO:0048844	0.000249457	3.60301	76	1294	19	21354	ACVRL1,ADGRF5,BMP4,COL3A1,ENG,FKBP10,FOXF1,GJA5,HAND2,HEY2,MYLK,MYOCD,NOG,NOTCH3,NRP1,PDGFRB,PKD2,TBX2,TGFB2
GO:BP	dopamine transport	GO:0015872	0.000262536	3.58081	55	1294	16	21354	CNR1,CXCL12,GABBR1,GDNF,KCNA2,NPY2R,OPRK1,RAB3B,SNCA,SYT1,SYT13,SYT15,SYT17,SYT4,SYT6,SYT9
GO:BP	positive regulation of potassium ion transport	GO:0043268	0.000262536	3.58081	55	1294	16	21354	AKAP6,AMIGO1,ANK2,ATP1B2,DPP6,FLNA,GAL,GALR2,KCNC2,KCNH2,KCNIP2,KCNMB1,LRRC55,OPRK1,PRKG1,RNF207
GO:BP	glomerulus development	GO:0032835	0.000268232	3.57149	69	1294	18	21354	ACTA2,ANGPT1,BMP4,C3AR1,CFH,GPR4,LAMB2,NID1,NOG,NOTCH3,OSR1,PDGFD,PDGFRA,PDGFRB,PODXL,TCF21,TEK,WWTR1
GO:BP	cardiac muscle cell differentiation	GO:0055007	0.000280379	3.55225	142	1294	27	21354	AKAP6,AW551984,BMP4,BVES,CAV3,COL14A1,FHOD3,GREM1,HAND2,HEY2,IGF1,ITGB1,MYH10,MYH11,MYOCD,PDGFRA,PDGFRB,PI16,POPDC2,PRKG1,RGS4,SGCB,SGCD,SLC25A4,SORBS2,SPEG,WISP1
GO:BP	cardiac epithelial to mesenchymal transition	GO:0060317	0.000310857	3.50744	31	1294	12	21354	ENG,HAS2,HEY2,NOG,OLFM1,SNAI1,SNAI2,SPRY1,TGFB2,TGFBR3,TMEM100,TWIST1
GO:BP	regulation of vascular endothelial growth factor receptor signaling pathway	GO:0030947	0.000310857	3.50744	31	1294	12	21354	ANGPT1,BMP4,CADM4,EMILIN1,EPN2,FGF18,GRB10,MMRN2,MYOF,TEK,TMEM204,VEGFB
GO:BP	endocardial cushion morphogenesis	GO:0003203	0.000310857	3.50744	31	1294	12	21354	ACVRL1,BMP5,DCHS1,ENG,NOG,NOS3,SNAI1,SNAI2,TBX2,TGFB2,TMEM100,TWIST1
GO:BP	trabecula morphogenesis	GO:0061383	0.000311731	3.50622	49	1294	15	21354	ADAMTS1,ADGRG6,BMP5,CAV3,CCM2L,COL1A1,ENG,GREM1,HEY2,MMP2,NOG,SFRP1,TEK,TGFB2,THBS3
GO:BP	response to nitrogen compound	GO:1901698	0.000321285	3.49311	1202	1294	118	21354	ABCC9,ADCY5,ADGRL3,AGTR1A,AKAP6,AMIGO1,ANXA1,ATP2B4,BACE1,BRSK2,C1QTNF9,C5AR1,CACNA1B,CACNB1,CACNG4,CALY,CASQ2,CAV1,CAV2,CAV3,CDH13,CHRM2,CHRNA3,CNGA3,CNR1,COL16A1,COL1A1,COL1A2,COL3A1,COL5A2,COL6A1,COLEC12,CPEB1,CTGF,CXCL12,DBH,DLG4,DMTN,EDNRA,EDNRB,EIF4EBP1,ELAVL4,ENHO,FABP3,FBN1,FBXO2,FLNA,GABRB3,GAL,GCGR,GJA1,GLP2R,GLRB,GNAO1,GPR173,GRB10,GRB14,HNMT,HPCA,HTR3A,HTR3B,IGF1,IGF1R,IGFBP5,IRS1,ITG…
GO:BP	muscle cell migration	GO:0014812	0.000341923	3.46607	109	1294	23	21354	ADAMTS1,ANXA1,CYP1B1,DOCK4,GRB10,HAS2,IGF1,IGFBP3,IGFBP5,MYOCD,NDRG4,P2RY6,PARVA,PDGFD,PDGFRB,PLAU,POSTN,PRKG1,SLIT2,SMO,TACR1,VTN,WISP1
GO:BP	cellular response to oxygen-containing compound	GO:1901701	0.000346676	3.46008	1243	1294	121	21354	ADCY1,ADCY5,AGTR1A,AKAP6,AMIGO1,ANXA1,ATP2B4,AXL,BACE1,BMP4,BRSK2,C1QTNF9,CACNB1,CALCRL,CALY,CAV1,CAV2,CERS1,CHRM2,CHRNA3,COL16A1,COL1A1,COL1A2,COL3A1,COL5A2,COL6A1,CPEB1,CX3CR1,CYP1B1,DAPK1,DMTN,EDNRB,EFNA5,EIF4EBP1,ENHO,EPOR,ESR1,FBLN5,FBN1,FGFR2,FKBP1B,FLNA,GCGR,GDAP1,GDNF,GJA1,GLP2R,GNAI1,GNAO1,GPBAR1,GPR173,GPR27,GPR37,GPR37L1,GRB10,GRB14,HGF,HTR3A,HTR3B,IGF1,IGF1R,IGFBP5,IRS1,KANK1,KANK2,KC…
GO:BP	neural precursor cell proliferation	GO:0061351	0.000349258	3.45685	180	1294	31	21354	ADCYAP1,BBS1,C5AR1,CDH2,CX3CR1,EML1,FAM19A1,FGF2,FGFR1,FLNA,GATA2,GJC2,GLI2,GLI3,GPR37L1,HHIP,ID4,IGF1,KIF1A,LIMS2,NES,NOG,NUMBL,PTBP2,PTN,RORA,SLC16A2,SMO,SOX10,TRNP1,ZFP423
GO:BP	release of sequestered calcium ion into cytosol by endoplasmic reticulum	GO:1903514	0.000357309	3.44696	26	1294	11	21354	ANK2,CACNA1C,CASQ1,CASQ2,DMD,FKBP1B,NOL3,PLN,RYR2,SLC8A1,TRDN
GO:BP	renal tubule morphogenesis	GO:0061333	0.000389881	3.40907	78	1294	19	21354	AGTR1A,BMP4,DCHS1,FAT4,FGF1,FGF2,GDNF,GLI3,GPC3,GREM1,KIF26B,MAGED1,NOG,NPNT,OSR1,PKD2,SMO,TCF21,WNT2B
GO:BP	regulation of cellular protein metabolic process	GO:0032268	0.00039846	3.39962	2469	1294	210	21354	ACVRL1,ADARB1,ADCYAP1,ADRA2B,ADRA2C,AFAP1L2,AGTR1A,AKAP6,ANGPT1,ANTXR1,APLNR,ATP2B4,BAG2,BBS7,BDKRB2,BMP4,BMP5,BMPER,C1QTNF2,C1QTNF9,C5AR1,CADM4,CASP12,CAV1,CAV2,CAV3,CCBE1,CD109,CDH5,CERS1,CHRNA3,CLIP3,CNTN1,COL28A1,COL6A3,CPEB1,CRTAP,CRYAB,CSPG4,CTGF,CX3CR1,CYP1B1,DAB2,DACT1,DAPK1,DDR2,DLC1,DLG4,DMD,DMPK,DMTN,DYSF,ECM1,EDNRA,EDNRB,EFNA5,EIF4EBP1,ELAVL4,EMILIN1,ENG,EPHA7,F2R,F3,FAM107A,FAM129A,F…
GO:BP	cardiac muscle tissue growth	GO:0055017	0.000485247	3.31404	111	1294	23	21354	AKAP6,CAV3,CCM2L,COL14A1,FGF1,FGF2,FGFR1,GJA1,HEY2,IGF1,KCNK2,MEIS1,MYOCD,NOG,PI16,PRKG1,RGS4,SLC25A4,SORBS2,TBX2,TGFB2,WISP1,ZFPM2
GO:BP	negative regulation of cell development	GO:0010721	0.000503144	3.29831	202	1294	33	21354	ADCYAP1,BMP4,CAV3,DAAM2,DMTN,EDNRB,EFNA5,EPHA7,FBN1,FRZB,GPR37L1,GRB14,ID4,IGF1,KANK1,NFATC4,NOG,NPR2,NRP1,NTN1,POSTN,PTN,PTPRS,RGMA,SEMA3A,SEMA3F,SEMA3G,SLIT2,SOX10,SPRY4,SYT4,TLX2,TRPC6
GO:BP	regeneration	GO:0031099	0.000532267	3.27387	232	1294	36	21354	ANXA1,APOD,AXL,CHL1,CXCL12,DMD,DYSF,ELAVL4,FKBP1B,FLNA,GAP43,GFAP,GJA1,GLI3,HGF,IGF1,IGSF10,JAM3,LAMB2,LIFR,MAP1B,MMP2,MUSTN1,NEFL,PLAU,POSTN,PTN,PTPRS,PTPRU,RGMA,RTN4RL2,SGCA,TGFBR3,TNC,VTN,WDR35
GO:BP	cell-cell signaling involved in cardiac conduction	GO:0086019	0.000569927	3.24418	27	1294	11	21354	ANK2,CACNA1C,CACNA1G,CACNB2,FLNA,GJA5,KCNA5,KCNJ5,RYR2,SCN1B,SCN5A
GO:BP	positive regulation of calcium ion transport into cytosol	GO:0010524	0.000582733	3.23453	65	1294	17	21354	ADCYAP1R1,AGTR1A,AKAP6,APLNR,BMP4,CASQ1,CAV1,EDNRA,F2R,JPH2,NTSR1,P2RY6,PKD2,SNCA,TRDN,TRPC1,TRPC3
GO:BP	negative regulation of calcium ion transport	GO:0051926	0.000582733	3.23453	65	1294	17	21354	ATP1A2,CASQ2,CAV3,DYSF,FKBP1B,GNAO1,NOS1,NOS3,NTSR1,OPRL1,PKD2,PLN,PTGS2,REM1,STC1,TGFB2,TRDN
GO:BP	negative regulation of cation transmembrane transport	GO:1904063	0.000629416	3.20106	96	1294	21	21354	ATP1A2,CASQ2,CAV1,CAV3,DYSF,FKBP1B,HECW2,KCNAB1,KCNE4,KCNH2,NOS1,NTSR1,OPRL1,OSR1,PKD2,PLN,REM1,RGS4,TGFB2,TRDN,TWIST1
GO:BP	regulation of epithelial to mesenchymal transition	GO:0010717	0.000629416	3.20106	96	1294	21	21354	BMP4,COL1A1,DAB2,DACT3,ENG,FERMT2,GREM1,LOXL2,MYOCD,NOG,OLFM1,PHLDB2,SFRP1,SNAI1,SPRY1,TGFB1I1,TGFB2,TGFB3,TWIST1,VASN,WWTR1
GO:BP	bone development	GO:0060348	0.000652736	3.18526	214	1294	34	21354	BGN,BMP4,CADM1,COL1A1,DCHS1,FAT4,FBN1,FGF18,GJA1,GLI3,GREM1,HAS2,IGF1,LTBP3,MEIS1,MMP16,NPR2,P3H1,PLS3,RAB23,RARG,SCUBE2,SERPINH1,SMAD9,SPARC,STC1,TEK,TGFB3,THBS3,TIFAB,TMEM119,TTC9,TWIST1,WISP1
GO:BP	protein localization to extracellular region	GO:0071692	0.00065686	3.18253	382	1294	50	21354	ADCY5,ADCYAP1,AGTR1A,ANXA1,APBB1,BRSK2,C1QTNF3,CACNA1C,CD200,CNR1,CPLX1,DMTN,DOC2B,EFNA5,ENHO,F2R,FBN1,FKBP1B,FRMD4A,GJA1,GJA5,GPR27,IGF1,ILDR2,IRS1,KCNB1,LEPR,LTBP1,MYH10,MYOM1,NLGN2,NOS1,OLFM2,P3H1,PAM,PFKM,PTPRN,RAB11FIP5,RAB12,RAB3B,RAB3C,RCN3,SFRP1,SLC18A2,SYT4,SYT9,TACR2,TGFB2,TGFB3,WLS
GO:BP	ventricular cardiac muscle cell action potential	GO:0086005	0.000697839	3.15624	33	1294	12	21354	CACNA1C,CAV1,CAV3,CTNNA3,GJA5,KCND3,KCNE4,KCNH2,KCNJ8,RNF207,RYR2,SCN5A
GO:BP	regulation of smooth muscle cell migration	GO:0014910	0.000763749	3.11705	89	1294	20	21354	ADAMTS1,CYP1B1,DOCK4,HAS2,IGF1,IGFBP3,IGFBP5,MYOCD,NDRG4,P2RY6,PDGFD,PDGFRB,PLAU,POSTN,PRKG1,SLIT2,SMO,TACR1,VTN,WISP1
GO:BP	regulation of supramolecular fiber organization	GO:1902903	0.000771733	3.11253	384	1294	50	21354	AEBP1,ARHGAP6,ARHGEF15,CAV1,CAV3,CDC42EP3,CDH5,CFL2,CHADL,CLIP3,CRYAB,CTGF,CTNNA2,DLC1,DMTN,EMILIN1,FERMT2,FGF13,FHOD3,FLNA,FMN2,GAS2L2,JMY,KANK1,KANK2,KANK4,KIRREL,LIMCH1,LMOD1,MAP1B,MAPT,NRP1,PDLIM4,PHLDB2,PLEKHH2,PPM1E,PPP1R9A,RGS4,SHANK3,SLIT2,SNCA,SORBS3,STMN2,SYNPO2,TACR1,TGFB3,TMOD1,TPM1,TUBB4A,WASF3
GO:BP	regulation of osteoblast differentiation	GO:0045667	0.00078117	3.10725	140	1294	26	21354	BMP4,CHRD,DDR2,FERMT2,FGF2,FGFR1,GDF10,GLI3,GREM1,HAND2,IGF1,IGFBP5,LRP3,NELL1,NOG,NPNT,PDLIM7,PRKD1,SCUBE2,SFRP1,SNAI2,TMEM119,TWIST1,TWSG1,WISP1,WWTR1
GO:BP	regulation of hydrolase activity	GO:0051336	0.000847099	3.07207	1264	1294	121	21354	ADCYAP1,ADCYAP1R1,AGTR1A,ANTXR1,ANXA1,APC2,ARHGAP20,ARHGAP23,ARHGAP44,ARHGAP6,ARHGEF15,ATP1B2,BVES,CASP12,CAV1,CAV2,CCDC8,CD109,CD200,CDKL5,CHN1,COL28A1,COL6A3,CRYAB,CTGF,DAPK1,DLC1,DLG2,DMPK,DOCK4,ECM1,EFNA5,ELMOD1,EPHA7,ESR1,F2R,F3,FERMT2,FGD1,FGF2,FGFR1,FGFR2,FKBP1B,FLT1,FN1,GNAO1,GPC3,HGF,HIP1,HPCA,HSPA2,IGF1,IGFBP3,ITGB1,LEPR,LGMN,MTSS1L,MYO9A,NAPB,NGF,NMUR1,NOL3,NOS1,NOS3,NPNT,NRP1,OAS1D,PC…
GO:BP	negative regulation of growth	GO:0045926	0.000874767	3.05811	257	1294	38	21354	ACVRL1,APBB1,BMP4,CAV3,CRYAB,DACT3,DCBLD2,EPHA7,FRZB,GAS1,GJA1,GPC3,GREM1,IGFBP5,KCNK2,LGMN,MEIS1,NKD1,NOG,NRP1,NTN1,P3H1,PI16,PTPRS,RERG,RGMA,RGS4,SEMA3A,SEMA3F,SEMA3G,SERPINE2,SFRP1,SLIT2,SLIT3,SOX17,TGFB2,TRO,WWC2
GO:BP	regulation of action potential	GO:0098900	0.00093716	3.02819	67	1294	17	21354	ANK2,CACNA1C,CAV1,CAV3,CNR1,CTNNA3,FGF13,FLNA,GJA5,KCNB1,KCNC4,NTSR1,RNF207,RYR2,SCN5A,SLC8A2,TACR1
GO:BP	nephron epithelium development	GO:0072009	0.000950775	3.02192	115	1294	23	21354	AGTR1A,BMP4,DCHS1,FAT4,FGF1,FGF2,GDNF,GLI3,GPC3,GREM1,KIF26B,LAMB2,MAGED1,NOG,NPNT,OSR1,PKD2,PODXL,SALL1,SMO,TCF21,WNT2B,WWTR1
GO:BP	regulation of morphogenesis of a branching structure	GO:0060688	0.000990139	3.0043	60	1294	16	21354	AGTR1A,BMP4,CAV3,ESR1,FGF7,FGFR1,GDNF,GREM1,HGF,MAGED1,NOG,PDGFRA,SFRP1,SMO,SNAI2,WNT2B
GO:BP	substrate adhesion-dependent cell spreading	GO:0034446	0.00102997	2.98717	107	1294	22	21354	ANTXR1,AXL,BVES,DMTN,EFNA5,FERMT2,FLNA,FN1,HAS2,ITGA8,KANK1,LAMB1,LAMB2,LAMC3,LIMS2,NRP1,PARVA,PARVB,POSTN,SFRP1,SPRY4,TEK
GO:BP	outflow tract morphogenesis	GO:0003151	0.00105195	2.97801	75	1294	18	21354	BMP4,ENG,FZD1,FZD2,GJA5,HAND2,HEY2,NOG,NPY1R,NPY2R,NRP1,NRP2,PARVA,SOX17,TBX2,TGFB2,TWIST1,ZFPM2
GO:BP	appendage development	GO:0048736	0.0010728	2.96948	189	1294	31	21354	BBS7,BMP4,CACNA1C,FERMT2,FGFR1,FREM2,GAS1,GJA1,GJA5,GLI2,GLI3,GPC3,GREM1,HAND2,MEOX2,MUSTN1,NOG,NR2F2,OSR1,PAM,RARG,RECK,ROR2,RSPO2,RSPO3,SALL1,TBX2,TGFB2,TWIST1,WNT9A,ZBTB16
GO:BP	limb development	GO:0060173	0.0010728	2.96948	189	1294	31	21354	BBS7,BMP4,CACNA1C,FERMT2,FGFR1,FREM2,GAS1,GJA1,GJA5,GLI2,GLI3,GPC3,GREM1,HAND2,MEOX2,MUSTN1,NOG,NR2F2,OSR1,PAM,RARG,RECK,ROR2,RSPO2,RSPO3,SALL1,TBX2,TGFB2,TWIST1,WNT9A,ZBTB16
GO:BP	regulation of vesicle-mediated transport	GO:0060627	0.00108813	2.96332	573	1294	66	21354	ADCY1,ANGPT1,ANXA1,APBA1,APLN,ARHGAP44,AXL,BACE1,BVES,CACNA1G,CACNB2,CADPS,CALY,CAV1,CAV3,CDH13,CHRM2,CHRNA3,CHRNA5,CLIP3,CNR1,CPLX1,DAB2,DLG4,DNAJC6,DOC2B,DYSF,EHD2,EPN2,FOXF1,GAS1,GATA2,GPC3,GREM1,HIP1,HPCA,ITGB1,KCNB1,LRRTM1,NAPB,NCS1,NDRG4,NECAB2,PLS3,PRKAR1B,PROS1,RAB12,RAB3B,RAB3C,RIMS3,RIT2,SGIP1,SLC10A4,SNAP91,SNCA,SYN1,SYP,SYT1,SYT13,SYT15,SYT17,SYT4,SYT6,SYT9,TUB,VTN
GO:BP	regulation of transforming growth factor beta receptor signaling pathway	GO:0017015	0.00111874	2.95127	116	1294	23	21354	ASPN,CAV1,CAV2,CAV3,CD109,CIDEA,DAB2,EMILIN1,ENG,FBN1,HTRA3,ITGA8,LTBP1,MYOCD,NPNT,PEG10,SPRY1,TGFB1I1,TGFB3,TGFBR3,VASN,WFIKKN2,ZEB1
GO:BP	regulation of sodium ion transport	GO:0002028	0.00112062	2.95054	91	1294	20	21354	ATP1A2,ATP1B2,ATP2B4,CAV3,CNTN1,DMD,DMPK,FGF13,FXYD1,FXYD6,FXYD7,HECW2,NOS1,NOS3,OSR1,PLCB1,SCN1B,SCN5A,SERPINE2,SLC8A1
GO:BP	embryonic appendage morphogenesis	GO:0035113	0.00120236	2.91997	134	1294	25	21354	BMP4,CACNA1C,FGFR1,FREM2,GAS1,GJA1,GJA5,GLI2,GLI3,GPC3,GREM1,HAND2,MUSTN1,NOG,OSR1,RARG,RECK,ROR2,RSPO2,SALL1,TBX2,TGFB2,TWIST1,WNT9A,ZBTB16
GO:BP	embryonic limb morphogenesis	GO:0030326	0.00120236	2.91997	134	1294	25	21354	BMP4,CACNA1C,FGFR1,FREM2,GAS1,GJA1,GJA5,GLI2,GLI3,GPC3,GREM1,HAND2,MUSTN1,NOG,OSR1,RARG,RECK,ROR2,RSPO2,SALL1,TBX2,TGFB2,TWIST1,WNT9A,ZBTB16
GO:BP	positive regulation of blood vessel endothelial cell migration	GO:0043536	0.00126717	2.89716	61	1294	16	21354	AMOTL1,ANGPT1,ANXA1,FGF18,FGF2,FGFR1,GATA2,HSPB1,IGF1,KDR,NOS3,NRP1,PRKD1,PTGS2,RHOJ,SRPX2
GO:BP	collagen biosynthetic process	GO:0032964	0.00126717	2.89716	61	1294	16	21354	BMP4,COL1A1,COL5A1,CTGF,CYGB,EMILIN1,ENG,F2R,FN1,LARP6,LTBP1,P3H3,PDGFRB,RCN3,SERPINH1,TGFB3
GO:BP	coronary vasculature morphogenesis	GO:0060977	0.00135129	2.86925	29	1294	11	21354	ANGPT1,EPOR,FGF1,FGF2,FGFR1,HAND2,HEY2,NRP1,PDGFRB,SGCD,ZFPM2
GO:BP	prostate gland epithelium morphogenesis	GO:0060740	0.00135129	2.86925	29	1294	11	21354	BMP4,CYP7B1,ESR1,GLI2,ID4,IGF1,MMP2,NOG,RARG,SFRP1,TNC
GO:BP	neuron projection regeneration	GO:0031102	0.00147745	2.83049	69	1294	17	21354	APOD,CHL1,FKBP1B,FLNA,GAP43,GFAP,HGF,JAM3,LAMB2,MAP1B,MMP2,NEFL,PTN,PTPRS,RGMA,RTN4RL2,TNC
GO:BP	regulation of potassium ion transmembrane transporter activity	GO:1901016	0.00147745	2.83049	69	1294	17	21354	AKAP6,AMIGO1,ANK2,ATP1B2,CASQ2,CAV1,CAV3,GAL,GALR2,ITGB1,KCNAB1,KCNC2,KCNE4,KCNG1,LRRC55,PRKG1,RNF207
GO:BP	heart growth	GO:0060419	0.00153926	2.81269	118	1294	23	21354	AKAP6,CAV3,CCM2L,COL14A1,FGF1,FGF2,FGFR1,GJA1,HEY2,IGF1,KCNK2,MEIS1,MYOCD,NOG,PI16,PRKG1,RGS4,SLC25A4,SORBS2,TBX2,TGFB2,WISP1,ZFPM2
GO:BP	regulation of ryanodine-sensitive calcium-release channel activity	GO:0060314	0.00158008	2.80132	19	1294	9	21354	AKAP6,CASQ2,DMD,FKBP1B,JPH2,JPH3,PKD2,PLN,TRDN
GO:BP	learning	GO:0007612	0.00158332	2.80043	173	1294	29	21354	ATP1A2,B4GALT2,BRSK1,CACNA1C,CNTNAP2,DBH,ELAVL4,FGF13,FOXP2,GABRB3,ITGB1,JPH3,JPH4,LGMN,MAPK8IP2,NDRG4,NOG,NPTX2,NTSR1,OPRK1,OPRL1,PRKAR2B,PTGS2,PTN,SHANK3,SLC8A2,SNAP25,TACR1,TACR2
GO:BP	cell differentiation involved in metanephros development	GO:0072202	0.00160564	2.79435	24	1294	10	21354	BMP4,FAT4,GDNF,GREM1,LAMB2,OSR1,SALL1,SMO,TCF21,WWTR1
GO:BP	presynapse organization	GO:0099172	0.0016125	2.7925	62	1294	16	21354	C5AR1,CADM1,CBLN2,CLSTN3,CNTN5,FZD1,GPC6,LRRC4B,LRRTM1,NLGN2,PCDH17,PLS3,PTPRS,SLITRK3,SLITRK5,SNCA
GO:BP	regulation of cell development	GO:0060284	0.00166869	2.77763	556	1294	64	21354	ADCYAP1,ADGRA2,AMIGO1,BMP4,CAV3,CDH5,CDKL5,CHODL,CX3CR1,CXCL12,DAAM2,DMTN,EDNRB,EFNA5,EPHA7,FBN1,FLNA,FN1,FRZB,GFAP,GJC2,GLI3,GPR37L1,GRB14,HAS2,HEY2,ID4,IGF1,KANK1,LIMS2,MAP1B,MAPT,NEFL,NFATC4,NGF,NOG,NOS1,NPR2,NRP1,NTN1,NUMBL,OBSL1,PLCB1,PLXNA4,PLXNB3,POSTN,PTN,PTPRS,RECK,RGMA,ROBO1,SEMA3A,SEMA3F,SEMA3G,SERPINE2,SHANK3,SLIT2,SMO,SOX10,SPRY4,SYT4,TLX2,TRPC6,ZFP365
GO:BP	exocrine system development	GO:0035272	0.00166885	2.77758	55	1294	15	21354	EDA,EDAR,FGF7,FGFR1,HGF,IGF1,LAMA1,NRP1,SEMA3A,SNAI2,SOX10,TGFB2,TGFB3,TWSG1,WLS
GO:BP	peptide secretion	GO:0002790	0.00169349	2.77122	428	1294	53	21354	ADCY5,ADCYAP1,AGTR1A,ANXA1,APBB1,APLN,BRSK2,C1QTNF3,CACNA1C,CD200,CNR1,CPLX1,DMTN,DOC2B,EFNA5,ENHO,F2R,FKBP1B,FRMD4A,GABBR1,GJA1,GJA5,GPR27,IGF1,ILDR2,IRS1,KCNB1,LEPR,MYH10,MYOM1,NLGN2,NOS1,NPY2R,OLFM2,P3H1,PAM,PFKM,PTPRN,RAB11FIP5,RAB12,RAB3B,RAB3C,RASL10B,RCN3,SFRP1,SLC16A2,SLC18A2,SYT4,SYT9,TACR2,TGFB2,TGFB3,WLS
GO:BP	cardiac septum development	GO:0003279	0.00170106	2.76928	110	1294	22	21354	BMP4,BMP5,ENG,FZD1,FZD2,GJA5,HAND1,HEY2,LTBP1,MYH10,NOG,NOS3,NRP1,NRP2,PARVA,PTK7,SLIT2,SLIT3,SMO,TBX2,TGFB2,ZFPM2
GO:BP	regulation of cellular response to transforming growth factor beta stimulus	GO:1903844	0.00180001	2.74473	119	1294	23	21354	ASPN,CAV1,CAV2,CAV3,CD109,CIDEA,DAB2,EMILIN1,ENG,FBN1,HTRA3,ITGA8,LTBP1,MYOCD,NPNT,PEG10,SPRY1,TGFB1I1,TGFB3,TGFBR3,VASN,WFIKKN2,ZEB1
GO:BP	glial cell differentiation	GO:0010001	0.00181171	2.74191	254	1294	37	21354	ADAM22,ADGRG6,BMP4,C5AR1,CDH2,DAAM2,DMD,DNER,FGF2,GAP43,GFAP,GLI3,GPR37L1,ID4,IGF1,KCNJ10,LAMA2,LAMB2,LAMC3,LGI4,MXRA8,NOG,PHOX2B,PLP1,PLPP3,PTN,ROR1,ROR2,S100B,SERPINE2,SMO,SOX10,TRPC4,TSPAN2,VTN,WASF3,ZFP365
GO:BP	smoothened signaling pathway	GO:0007224	0.00182509	2.73872	146	1294	26	21354	BBS7,BOC,CC2D2A,DHH,DZIP1,DZIP1L,EVC,EVC2,FOXF1,GAS1,GLI2,GLI3,GPC3,GPR161,GPR37L1,HHIP,PTPDC1,ROR2,RORA,SCUBE1,SCUBE2,SERPINE2,SFRP1,SMO,WNT9A,ZFP423
GO:BP	nephron tubule development	GO:0072080	0.00194704	2.71063	94	1294	20	21354	AGTR1A,BMP4,DCHS1,FAT4,FGF1,FGF2,GDNF,GLI3,GPC3,GREM1,KIF26B,MAGED1,NOG,NPNT,OSR1,PKD2,SMO,TCF21,WNT2B,WWTR1
GO:BP	prostate gland morphogenesis	GO:0060512	0.00201688	2.69532	30	1294	11	21354	BMP4,CYP7B1,ESR1,GLI2,ID4,IGF1,MMP2,NOG,RARG,SFRP1,TNC
GO:BP	cellular response to organic cyclic compound	GO:0071407	0.00201933	2.69479	595	1294	67	21354	ADCY1,ADCY5,ADCYAP1,AGTR1A,AKAP6,ANXA1,ATP1A2,ATP2B4,BMP4,CALY,CASQ2,CAV1,CAV2,CHRM2,COL1A1,COLEC12,CYP1B1,CYP7B1,DAB2,DMTN,EFNA5,EIF4EBP1,ESR1,FAM107A,FLNA,FOXF1,GABRB3,GDAP1,GDNF,GLI2,GNAI1,GNAO1,GPBAR1,HTR3A,HTR3B,IGF1,IGFBP5,KANK2,KCNMB1,MMP2,MN1,NFATC4,NOS1,NSG1,NSG2,P2RY6,PENK,PKD2,PLCB1,PTGER1,PTGS2,PTN,RBFOX2,RGS4,RORA,RYR2,SFRP1,SLC8A1,SMAD9,SMO,SNAI2,SOX10,SSTR1,SSTR4,STC1,TCF21,TNC
GO:BP	protein secretion	GO:0009306	0.0020328	2.6919	374	1294	48	21354	ADCY5,ADCYAP1,AGTR1A,ANXA1,APBB1,BRSK2,C1QTNF3,CACNA1C,CD200,CNR1,CPLX1,DMTN,DOC2B,EFNA5,ENHO,F2R,FKBP1B,FRMD4A,GJA1,GJA5,GPR27,IGF1,ILDR2,IRS1,KCNB1,LEPR,MYH10,MYOM1,NLGN2,NOS1,OLFM2,P3H1,PAM,PFKM,PTPRN,RAB11FIP5,RAB12,RAB3B,RAB3C,RCN3,SFRP1,SLC18A2,SYT4,SYT9,TACR2,TGFB2,TGFB3,WLS
GO:BP	establishment of planar polarity	GO:0001736	0.00204069	2.69022	63	1294	16	21354	ASTN2,BRSK1,BRSK2,DAB2,DACT1,DCHS1,FAT4,FOXF2,FZD1,FZD2,GPC3,NKD1,PLEKHA4,PTK7,ROR2,SFRP1
GO:BP	negative regulation of smooth muscle cell proliferation	GO:0048662	0.00215246	2.66706	56	1294	15	21354	APLN,APOD,CAV1,CNN1,ESR1,IGFBP3,IGFBP5,MYOCD,NDRG4,NOS3,NPR1,PRKG1,PTGIR,RGS5,TGFB3
GO:BP	regulation of cardiac muscle contraction by calcium ion signaling	GO:0010882	0.00216804	2.66393	15	1294	8	21354	ANK2,CACNA1C,CASQ2,DMD,FKBP1B,PLN,RYR2,SLC8A1
GO:BP	cartilage morphogenesis	GO:0060536	0.00218142	2.66126	11	1294	7	21354	HAND1,HAND2,HOXA5,RSPO2,SNAI1,SNAI2,STC1
GO:BP	establishment of protein localization to extracellular region	GO:0035592	0.00219746	2.65808	375	1294	48	21354	ADCY5,ADCYAP1,AGTR1A,ANXA1,APBB1,BRSK2,C1QTNF3,CACNA1C,CD200,CNR1,CPLX1,DMTN,DOC2B,EFNA5,ENHO,F2R,FKBP1B,FRMD4A,GJA1,GJA5,GPR27,IGF1,ILDR2,IRS1,KCNB1,LEPR,MYH10,MYOM1,NLGN2,NOS1,OLFM2,P3H1,PAM,PFKM,PTPRN,RAB11FIP5,RAB12,RAB3B,RAB3C,RCN3,SFRP1,SLC18A2,SYT4,SYT9,TACR2,TGFB2,TGFB3,WLS
GO:BP	calcium ion import	GO:0070509	0.00240917	2.61813	87	1294	19	21354	AGTR1A,CACNA1B,CACNA1C,CACNA1G,CACNA1H,CACNB2,CAV3,CXCL12,DYSF,FAM155A,MICU3,PDGFRB,PKD2,PLN,SLC25A23,SLC8A1,SLC8A2,STC1,TRPC4
GO:BP	bone mineralization	GO:0030282	0.00244696	2.61137	121	1294	23	21354	ASPN,BMP4,CLEC3B,COL1A2,DDR2,ECM1,GJA1,GPC3,GREM1,IGF1,LTBP3,NELL1,OSR1,PTGS2,PTH1R,PTN,ROR2,RSPO2,SLC24A3,SLC8A1,TGFB3,TMEM119,TWIST1
GO:BP	ventricular cardiac muscle cell membrane repolarization	GO:0099625	0.00253067	2.59676	25	1294	10	21354	CAV3,GJA1,GJA5,KCND3,KCNE4,KCNH2,KCNJ8,RNF207,SCN1B,SCN5A
GO:BP	establishment of tissue polarity	GO:0007164	0.00256896	2.59024	64	1294	16	21354	ASTN2,BRSK1,BRSK2,DAB2,DACT1,DCHS1,FAT4,FOXF2,FZD1,FZD2,GPC3,NKD1,PLEKHA4,PTK7,ROR2,SFRP1
GO:BP	regulation of blood vessel endothelial cell migration	GO:0043535	0.00258174	2.58809	104	1294	21	21354	ACVRL1,AMOTL1,ANGPT1,ANXA1,ATP2B4,FGF18,FGF2,FGFR1,GATA2,HSPB1,IGF1,KDR,MEOX2,MMRN2,NOS3,NRP1,PRKD1,PTGS2,RHOJ,SRPX2,VASH1
GO:BP	phosphorylation	GO:0016310	0.00261462	2.58259	2077	1294	178	21354	AATK,ACVRL1,ADARB1,ADCYAP1,ADRA2B,ADRA2C,AFAP1L2,AGTR1A,AK4,AKAP12,AKAP6,ANGPT1,APLN,APLNR,ATP2B4,AXL,BDKRB2,BMP4,BMP5,BMPER,BRSK1,BRSK2,C1QTNF2,C1QTNF9,C5AR1,CADM4,CAMK1G,CAV1,CAV2,CAV3,CD109,CDH5,CDKL5,CERS1,CHRNA3,CKM,CLIP3,CNTN1,CSPG4,CTGF,CX3CR1,DAB2,DAPK1,DDR2,DGKB,DLG4,DMD,DMPK,DMTN,EDNRA,EDNRB,EEF1A2,EFEMP1,EFNA5,EMILIN1,ENG,ENO2,EPHA7,F2R,FAM129A,FAM212B,FBN1,FERMT2,FGF1,FGF13,FGF18,FGF2…
GO:BP	export across plasma membrane	GO:0140115	0.00275856	2.55932	57	1294	15	21354	ATP1A2,ATP1B2,ATP2B3,FXYD1,GJA1,KCNA2,KCNA5,KCNB1,KCND3,KCNE4,KCNH2,KCNIP2,KCNT2,SLC8A1,SLC8A2
GO:BP	roof of mouth development	GO:0060021	0.00277407	2.55688	96	1294	20	21354	BBS7,BNC2,FOXF2,FZD1,FZD2,GABRB3,GAS1,GLI3,HAND2,LRRC32,MEOX2,OSR1,PDGFRA,SNAI1,SNAI2,TBX2,TCF21,TGFB2,TWIST1,WFIKKN2
GO:BP	salivary gland morphogenesis	GO:0007435	0.00290521	2.53682	37	1294	12	21354	EDA,EDAR,FGF7,FGFR1,HGF,LAMA1,NRP1,SEMA3A,SNAI2,TGFB2,TGFB3,TWSG1
GO:BP	nerve development	GO:0021675	0.00292745	2.53351	80	1294	18	21354	ADARB1,DMD,GABRB3,GLI3,HOXB2,KCNA2,LRIG1,NGF,NPTX1,NRP1,NRP2,PHOX2A,PHOX2B,PLXNA4,SEMA3A,SEMA3F,SERPINE2,TIFAB
GO:BP	negative regulation of supramolecular fiber organization	GO:1902904	0.00314152	2.50286	169	1294	28	21354	ARHGAP6,CAV3,CDH5,CHADL,CLIP3,CRYAB,CTNNA2,DLC1,DMTN,EMILIN1,FGF13,FHOD3,GAS2L2,KANK1,KANK2,KANK4,LMOD1,MAP1B,PHLDB2,PLEKHH2,PPP1R9A,SHANK3,SLIT2,SNCA,STMN2,TMOD1,TPM1,TUBB4A
GO:BP	catecholamine secretion	GO:0050432	0.00321752	2.49248	65	1294	16	21354	CADPS,CNR1,CXCL12,GABBR1,KCNA2,KCNB1,NPY2R,OPRK1,SNCA,SYT1,SYT13,SYT15,SYT17,SYT4,SYT6,SYT9
GO:BP	renal tubule development	GO:0061326	0.00329773	2.48178	97	1294	20	21354	AGTR1A,BMP4,DCHS1,FAT4,FGF1,FGF2,GDNF,GLI3,GPC3,GREM1,KIF26B,MAGED1,NOG,NPNT,OSR1,PKD2,SMO,TCF21,WNT2B,WWTR1
GO:BP	monoamine transport	GO:0015844	0.00329773	2.48178	97	1294	20	21354	CADPS,CNR1,CXCL12,GABBR1,GDNF,KCNA2,KCNB1,NOS1,NPY2R,OPRK1,RAB3B,SLC18A2,SNCA,SYT1,SYT13,SYT15,SYT17,SYT4,SYT6,SYT9
GO:BP	regulation of ERK1 and ERK2 cascade	GO:0070372	0.00338165	2.47087	336	1294	44	21354	ACKR3,ACTA2,ADCYAP1,AKAP12,ANGPT1,BMP4,BMPER,C1QTNF3,C5AR1,CAV1,CTGF,DMD,EDNRA,EMILIN1,EPHA7,EPOR,ESR1,F2R,FAM83D,FERMT2,FGF18,FGF2,FLT4,FN1,GPBAR1,HAND2,IGF1,KDR,MTURN,NDRG4,NECAB2,NGF,NPNT,NRP1,P2RY6,PDGFD,PDGFRA,PDGFRB,SPRY1,SPRY4,SSTR4,TEK,TIMP3,VEGFB
GO:BP	mesenchymal-epithelial cell signaling	GO:0060638	0.00342573	2.46525	8	1294	6	21354	FGF7,FGFR1,HGF,HOXA5,TNC,WNT2B
GO:BP	cell communication by electrical coupling involved in cardiac conduction	GO:0086064	0.00342573	2.46525	8	1294	6	21354	CAV1,GJA1,GJA5,GJC1,GJD3,SLC8A1
GO:BP	morphogenesis of a polarized epithelium	GO:0001738	0.00347954	2.45848	89	1294	19	21354	ASTN2,BRSK1,BRSK2,DAB2,DACT1,DCHS1,FAT4,FOXF1,FOXF2,FZD1,FZD2,GPC3,LAMA1,MYO9A,NKD1,PLEKHA4,PTK7,ROR2,SFRP1
GO:BP	cell migration involved in sprouting angiogenesis	GO:0002042	0.00351373	2.45423	58	1294	15	21354	ANXA1,CLEC14A,FGF2,GATA2,GREM1,ITGB1,KDR,MEOX2,MMRN2,NRP1,PTGS2,RHOJ,ROBO1,SLIT2,SRPX2
GO:BP	exocytosis	GO:0006887	0.00354654	2.4502	370	1294	47	21354	ADCY1,ANXA1,APBA1,BACE1,BRSK2,CACNA1C,CACNA1G,CACNB2,CADPS,CHRM2,CHRNA3,CHRNA5,CNR1,CPLX1,DMTN,DOC2B,EXOC3L2,FOXF1,GATA2,GCGR,KCNB1,LIN7B,MYH10,NAPB,NCS1,NKD2,RAB11FIP5,RAB12,RAB3B,RAB3C,RAB3IL1,RIMS3,SCRN1,SNAP25,SNCA,SV2A,SYN2,SYNGR1,SYNGR3,SYP,SYT1,SYT13,SYT15,SYT17,SYT4,SYT6,SYT9
GO:BP	catecholamine transport	GO:0051937	0.00355267	2.44945	81	1294	18	21354	CADPS,CNR1,CXCL12,GABBR1,GDNF,KCNA2,KCNB1,NPY2R,OPRK1,RAB3B,SNCA,SYT1,SYT13,SYT15,SYT17,SYT4,SYT6,SYT9
GO:BP	positive regulation of epithelial to mesenchymal transition	GO:0010718	0.00362413	2.4408	51	1294	14	21354	BMP4,COL1A1,DAB2,ENG,FERMT2,LOXL2,MYOCD,OLFM1,SNAI1,TGFB1I1,TGFB2,TGFB3,TWIST1,WWTR1
GO:BP	phosphatidylinositol-mediated signaling	GO:0048015	0.00380943	2.41914	161	1294	27	21354	ANGPT1,DCN,F2R,FBXL2,FLT1,HGF,IGF1,IGF1R,IRS1,KDR,NCS1,PDGFD,PDGFRA,PDGFRB,PIK3IP1,PIRT,PLCB1,PLCB4,PLCL1,PREX2,ROR1,ROR2,SELP,SERPINE2,TEK,TGFB2,TWIST1
GO:BP	trabecula formation	GO:0060343	0.00388902	2.41016	26	1294	10	21354	ADAMTS1,ADGRG6,CAV3,COL1A1,GREM1,HEY2,MMP2,SFRP1,TEK,THBS3
GO:BP	positive regulation of metabolic process	GO:0009893	0.00392769	2.40586	3754	1294	292	21354	ABLIM2,ABLIM3,ACTA2,ACTG2,ACVRL1,ADARB1,ADCYAP1,ADCYAP1R1,ADGRF5,ADRA2B,ADRA2C,AFAP1L2,AGTR1A,AKAP12,AKAP6,ANGPT1,ANK2,ANTXR1,ANXA1,APBB1,APLN,APLNR,ARMCX3,ATOH8,ATP2B4,AXL,BAG2,BBS7,BEX2,BMP4,BMP5,BVES,C1QTNF2,C1QTNF9,C3AR1,C5AR1,CASP12,CAV1,CAV2,CCBE1,CCDC3,CCM2L,CD200,CDH13,CDH3,CDH5,CELF4,CERS1,CHRNA3,CLIP3,CNTN1,COL1A1,CPEB1,CSPG4,CTGF,CX3CR1,CYP1B1,CYTL1,DAB2,DACT1,DAPK1,DBH,DCN,DDR2,DLC1,D…
GO:BP	regionalization	GO:0003002	0.00394205	2.40428	349	1294	45	21354	ACVRL1,BMP4,CHRD,DZIP1L,FGF1,FGF2,FGFR1,FOXF1,GAS1,GDNF,GLI2,GLI3,GPC3,GPR161,GREM1,GREM2,HEY2,HHIP,HOXA5,HOXA7,HOXB2,HOXC4,HOXC6,HOXC8,HOXC9,HOXD8,MEOX2,NOG,NR2F2,NRP1,NRP2,OSR1,RARG,ROR2,SEMA3A,SEMA3F,SFRP1,SMO,SNAI1,SOX17,SPRY1,TIFAB,WLS,WNT2B,ZBTB16
GO:BP	regulation of chemotaxis	GO:0050920	0.00400382	2.39753	231	1294	34	21354	ADGRA2,ARTN,C3AR1,C5AR1,CDH13,CXCL12,CXCL14,DYSF,EDNRA,FGF1,FGF18,FGF2,FGFR1,FN1,GREM1,HSPB1,JAM3,KDR,LGMN,NRP1,PDGFD,PDGFRA,PDGFRB,PLXNA4,PRKD1,PTN,ROBO1,SCG2,SEMA3A,SEMA3F,SEMA3G,SLIT2,SNAI2,VEGFB
GO:BP	positive regulation of macromolecule metabolic process	GO:0010604	0.00402125	2.39564	3442	1294	271	21354	ABLIM2,ABLIM3,ACTA2,ACTG2,ACVRL1,ADARB1,ADCYAP1,ADRA2B,ADRA2C,AFAP1L2,AGTR1A,AKAP12,AKAP6,ANGPT1,ANK2,ANTXR1,ANXA1,APBB1,APLN,APLNR,ARMCX3,ATOH8,ATP2B4,BAG2,BBS7,BEX2,BMP4,BMP5,BVES,C1QTNF2,C1QTNF9,C3AR1,C5AR1,CASP12,CAV1,CAV2,CCBE1,CCM2L,CD200,CDH13,CDH3,CDH5,CELF4,CERS1,CHRNA3,CLIP3,CNTN1,COL1A1,CPEB1,CSPG4,CTGF,CX3CR1,CYP1B1,CYTL1,DAB2,DACT1,DAPK1,DCN,DDR2,DLC1,DLG4,EBF3,EBF4,EDA,EDAR,EDNRA,ED…
GO:BP	cell communication by electrical coupling	GO:0010644	0.004105	2.38669	16	1294	8	21354	CASQ2,CAV1,GJA1,GJA5,GJC1,GJC2,GJD3,SLC8A1
GO:BP	positive regulation of endothelial cell chemotaxis	GO:2001028	0.004105	2.38669	16	1294	8	21354	FGF18,FGF2,FGFR1,HSPB1,KDR,LGMN,PRKD1,SNAI2
GO:BP	preganglionic parasympathetic fiber development	GO:0021783	0.004105	2.38669	16	1294	8	21354	ADARB1,HOXB2,NRP1,NRP2,PHOX2A,PLXNA4,SEMA3A,SEMA3F
GO:BP	neural crest cell differentiation	GO:0014033	0.00416273	2.38062	90	1294	19	21354	BMP4,CDH2,EDNRA,EDNRB,FN1,FRZB,GDNF,HAND2,NRP1,NRP2,PHOX2B,SEMA3A,SEMA3F,SEMA3G,SFRP1,SMO,SNAI2,SOX10,TWIST1
GO:BP	biomineralization	GO:0110148	0.00431157	2.36537	162	1294	27	21354	ASPN,BMP4,CLEC3B,COL1A1,COL1A2,DDR2,ECM1,FBLN7,GJA1,GPC3,GREM1,HEY2,IGF1,LTBP3,NELL1,NOS3,OSR1,PTGS2,PTH1R,PTN,ROR2,RSPO2,SLC24A3,SLC8A1,TGFB3,TMEM119,TWIST1
GO:BP	positive regulation of ERK1 and ERK2 cascade	GO:0070374	0.00442348	2.35424	232	1294	34	21354	ACKR3,ACTA2,ADCYAP1,AKAP12,ANGPT1,BMP4,BMPER,C1QTNF3,C5AR1,CTGF,EDNRA,EPOR,ESR1,F2R,FERMT2,FGF18,FGF2,FLT4,GPBAR1,HAND2,KDR,MTURN,NDRG4,NECAB2,NGF,NPNT,NRP1,P2RY6,PDGFD,PDGFRA,PDGFRB,SSTR4,TEK,VEGFB
GO:BP	axon regeneration	GO:0031103	0.0044494	2.3517	59	1294	15	21354	APOD,CHL1,FKBP1B,FLNA,GAP43,JAM3,LAMB2,MAP1B,MMP2,NEFL,PTN,PTPRS,RGMA,RTN4RL2,TNC
GO:BP	regulation of cell-substrate junction assembly	GO:0090109	0.0044494	2.3517	59	1294	15	21354	ACVRL1,APOD,ARHGAP6,COL16A1,DLC1,DMTN,EFNA5,FAM107A,FERMT2,GREM1,KDR,LIMCH1,NRP1,PHLDB2,TEK
GO:BP	regulation of focal adhesion assembly	GO:0051893	0.0044494	2.3517	59	1294	15	21354	ACVRL1,APOD,ARHGAP6,COL16A1,DLC1,DMTN,EFNA5,FAM107A,FERMT2,GREM1,KDR,LIMCH1,NRP1,PHLDB2,TEK
GO:BP	dendrite morphogenesis	GO:0048813	0.00450644	2.34617	172	1294	28	21354	ARHGAP44,CDKL5,CHRNA3,CTNNA2,DACT1,DLG4,ELAVL4,HECW2,ITGB1,KIF1A,MAPK8IP2,NFATC4,NRP1,NUMBL,OBSL1,PHACTR1,PPP1R9A,PREX2,PTN,RBFOX2,SDC2,SEMA3A,SHANK3,SLITRK5,TANC2,TLX2,TRPC6,ZFP365
GO:BP	telencephalon development	GO:0021537	0.00453551	2.34337	285	1294	39	21354	ALDH1A3,ATP1A2,ATP1B2,ATP2B4,BBS1,BMP4,CCDC141,CDH2,CNTNAP2,COL3A1,CRTAC1,CXCL12,DMD,FAT4,FEZ1,FGF13,FGFR1,FLNA,FOXP2,FUT10,GLI3,ID4,LAMB1,MYH10,NEFL,NUMBL,PHACTR1,PLCB1,PLXNA4,PTPRS,ROBO1,RTN4RL2,SALL1,SEMA3A,SHANK3,SLC8A1,SLIT2,SLITRK5,SMO
GO:BP	negative regulation of catalytic activity	GO:0043086	0.00460043	2.3372	821	1294	84	21354	ADARB1,ADCYAP1,AKAP6,ANXA1,AOC3,ATP2B4,BAG2,BMP4,CAV1,CAV3,CCDC8,CD109,CERS1,CNR1,COL28A1,COL6A3,CRYAB,DLG2,ECM1,ENG,FAM212B,FKBP1B,GABBR1,GALR2,GPC3,HGF,HPCA,HSPB1,IGF1,IGF1R,LEPR,MAPK8IP1,MAPT,MYOCD,NES,NGF,NOL3,NOS1,NOS3,NR2F2,OAS1D,PARVA,PCSK1N,PHACTR1,PHACTR2,PI16,PIK3IP1,PKIA,PLN,PLXNB3,PPM1E,PPP1R12B,PPP1R12C,PRKAR1B,PRKAR2B,PTGS2,PTN,PTPRB,RARRES1,RASIP1,RECK,SERPINB8,SERPINE2,SERPING1,SE…
GO:BP	reproductive structure development	GO:0048608	0.00466193	2.33143	501	1294	58	21354	ADAMTS1,ADCYAP1,ANGPT1,ANXA1,AXL,BMP4,BMP5,CYP7B1,DCN,DHH,EPOR,ESR1,FGF7,FLNA,FOXF2,FSTL3,GATA2,GJA1,GLI2,GLI3,GPR149,HAND1,HEY2,ID4,IGF1,MMP19,MMP2,MYOCD,NOG,NOS3,NR2F2,OAS1D,OSR1,PCDH12,PDGFRA,PDGFRB,PEG10,PKD2,PTGIS,PTGS2,PTN,RARG,ROR2,RSPO3,SALL1,SEMA3A,SERPINE2,SFRP1,SLIT3,SNAI1,STC1,TCF21,TGFB2,TIFAB,TNC,VASH1,WNT2B,ZFPM2
GO:BP	developmental maturation	GO:0021700	0.00467045	2.33064	307	1294	41	21354	ADGRL1,ARHGEF15,AXL,CDH3,CDH5,CNTNAP2,CSPG4,CX3CR1,DCHS1,DLG2,DLG4,EDNRB,EFCAB9,FAT4,FGFR1,GAL,GATA2,GJA1,GRB14,GREM1,HOXA5,IGF1,KCNIP2,LGI4,MAP1B,MMP2,NEFL,NFATC4,NGF,NPR2,PLCB1,PTH1R,PTPRN,RECK,SEZ6,SEZ6L,SOX10,SOX18,SYT4,TGFB2,THBS3
GO:BP	AV node cell to bundle of His cell signaling	GO:0086027	0.00496017	2.3045	12	1294	7	21354	ANK2,CACNA1C,CACNA1G,CACNB2,GJA5,RYR2,SCN5A
GO:BP	facial nerve development	GO:0021561	0.00496017	2.3045	12	1294	7	21354	ADARB1,HOXB2,NRP1,NRP2,PLXNA4,SEMA3A,SEMA3F
GO:BP	AV node cell action potential	GO:0086016	0.00496017	2.3045	12	1294	7	21354	ANK2,CACNA1C,CACNA1G,CACNB2,GJA5,RYR2,SCN5A
GO:BP	facial nerve morphogenesis	GO:0021610	0.00496017	2.3045	12	1294	7	21354	ADARB1,HOXB2,NRP1,NRP2,PLXNA4,SEMA3A,SEMA3F
GO:BP	metanephric nephron development	GO:0072210	0.00547749	2.26142	39	1294	12	21354	BMP4,GDNF,GREM1,KIF26B,LAMB2,OSR1,PDGFRA,PDGFRB,PKD2,SALL1,SMO,TCF21
GO:BP	inositol lipid-mediated signaling	GO:0048017	0.00550302	2.2594	164	1294	27	21354	ANGPT1,DCN,F2R,FBXL2,FLT1,HGF,IGF1,IGF1R,IRS1,KDR,NCS1,PDGFD,PDGFRA,PDGFRB,PIK3IP1,PIRT,PLCB1,PLCB4,PLCL1,PREX2,ROR1,ROR2,SELP,SERPINE2,TEK,TGFB2,TWIST1
GO:BP	regulation of cytoskeleton organization	GO:0051493	0.00569179	2.24475	540	1294	61	21354	ARHGAP44,ARHGAP6,ARHGEF15,CAV1,CAV3,CDC42EP3,CDH5,CFL2,CLIP3,CTGF,CTNNA2,DLC1,DMTN,EFNA5,FAM107A,FERMT2,FGF13,FHOD3,FLNA,FMN2,GAS2L2,GNAI1,JAM3,JMY,KANK1,KANK2,KANK4,KIRREL,LIMCH1,LMOD1,MAP1B,MAPT,NES,NEXN,NRP1,PAM,PDGFRB,PDLIM4,PHLDB2,PLEKHH2,PPM1E,PPP1R9A,RGS4,SHANK3,SLIT2,SNCA,SORBS3,STMN2,STMN3,STMN4,STMND1,SYDE1,SYNPO2,TACR1,TEK,TGFB2,TGFB3,TMOD1,TPM1,TUBB4A,WASF3
GO:BP	protein localization to cell junction	GO:1902414	0.00574175	2.24096	136	1294	24	21354	ADAM22,ARHGAP44,ASIC2,CACNG4,CDH5,CLSTN3,CPLX1,DLG2,DLG4,FERMT2,FLNA,GPC6,HSPB1,JAM3,KIF5A,KIF5C,LRRTM1,MAPK10,MAPT,NLGN2,NPTX1,NSG1,SHISA6,SNAP25
GO:BP	smooth muscle tissue development	GO:0048745	0.00584143	2.23348	27	1294	10	21354	BMP4,COL3A1,ENG,FOXP2,ITGA8,MYLK,OSR1,PDGFRB,PKD2,SMO
GO:BP	vesicle-mediated transport	GO:0016192	0.00591604	2.22797	1586	1294	141	21354	ACKR3,ACKR4,ADCY1,ANGPT1,ANK1,ANK2,ANXA1,AP3B2,APBA1,APLN,ARHGAP44,AXL,BACE1,BBS1,BRSK1,BRSK2,BVES,CACNA1C,CACNA1G,CACNB2,CACNG4,CADPS,CALCRL,CALY,CAV1,CAV2,CAV3,CD163,CD300LG,CDH13,CDH2,CHRM2,CHRNA3,CHRNA5,CLIP3,CNR1,COLEC12,COPZ2,CPLX1,DAB2,DENND2A,DLG4,DMTN,DNAJC6,DOC2B,DYSF,EHD2,EPN2,EXOC3L2,FCRLS,FLNA,FMN2,FOXF1,GAS1,GATA2,GCGR,GPC3,GPRASP1,GREM1,GRIA1,GULP1,HIP1,HPCA,HSPA2,IFITM3,IGF1R,ITGB…
GO:BP	sarcoplasmic reticulum calcium ion transport	GO:0070296	0.00603653	2.21921	33	1294	11	21354	ANK2,CACNA1C,CASQ1,CASQ2,DMD,FKBP1B,NOL3,PLN,RYR2,SLC8A1,TRDN
GO:BP	calcium-dependent cell-cell adhesion via plasma membrane cell adhesion molecules	GO:0016339	0.00603653	2.21921	33	1294	11	21354	CDH11,CDH13,CDH19,CDH2,CDH5,CDH6,DCHS1,PCDH12,PCDH18,PCDHGC3,SELP
GO:BP	ERK1 and ERK2 cascade	GO:0070371	0.00627785	2.20219	355	1294	45	21354	ACKR3,ACTA2,ADCYAP1,AKAP12,ANGPT1,BMP4,BMPER,C1QTNF3,C5AR1,CAV1,CTGF,DMD,EDNRA,EMILIN1,EPHA7,EPOR,ESR1,F2R,FAM83D,FERMT2,FGF18,FGF2,FLT4,FN1,GPBAR1,GRB10,HAND2,IGF1,KDR,MTURN,NDRG4,NECAB2,NGF,NPNT,NRP1,P2RY6,PDGFD,PDGFRA,PDGFRB,SPRY1,SPRY4,SSTR4,TEK,TIMP3,VEGFB
GO:BP	muscle tissue morphogenesis	GO:0060415	0.00632591	2.19888	76	1294	17	21354	ADARB1,ANGPT1,CCM2L,COL3A1,ENG,EPOR,FZD1,FZD2,HAND1,HEY2,MYLK,NOG,RYR2,TGFB2,TNNT2,TPM1,ZFPM2
GO:BP	reproductive system development	GO:0061458	0.00639176	2.19438	506	1294	58	21354	ADAMTS1,ADCYAP1,ANGPT1,ANXA1,AXL,BMP4,BMP5,CYP7B1,DCN,DHH,EPOR,ESR1,FGF7,FLNA,FOXF2,FSTL3,GATA2,GJA1,GLI2,GLI3,GPR149,HAND1,HEY2,ID4,IGF1,MMP19,MMP2,MYOCD,NOG,NOS3,NR2F2,OAS1D,OSR1,PCDH12,PDGFRA,PDGFRB,PEG10,PKD2,PTGIS,PTGS2,PTN,RARG,ROR2,RSPO3,SALL1,SEMA3A,SERPINE2,SFRP1,SLIT3,SNAI1,STC1,TCF21,TGFB2,TIFAB,TNC,VASH1,WNT2B,ZFPM2
GO:BP	positive regulation of Wnt signaling pathway	GO:0030177	0.00656705	2.18263	137	1294	24	21354	ADGRA2,CAV1,CDH3,COL1A1,DAAM2,DAB2,DACT1,DKK2,EDA,FGF2,GPC3,GPRC5B,KANK1,NKD1,PLEKHA4,PTK7,RECK,ROR2,RSPO2,RSPO3,SALL1,SFRP1,WISP1,WLS
GO:BP	response to estradiol	GO:0032355	0.00669087	2.17452	156	1294	26	21354	ADCYAP1R1,ANXA1,COL1A1,CRYAB,CTGF,DHH,ESR1,GJA1,IGFBP2,MAP1B,MMP2,NOS3,NR2F2,OPRL1,PAM,PDGFRB,PENK,POSTN,PTGFR,PTGS2,PTN,SFRP1,SSTR1,TACR1,TACR3,WFDC1
GO:BP	sodium ion transmembrane transport	GO:0035725	0.00669087	2.17452	156	1294	26	21354	ASIC2,ASIC4,ATP1A2,ATP1B2,ATP2B4,CACNA1G,CAV3,DMD,FGF13,FXYD1,FXYD6,FXYD7,HECW2,NOS1,OSR1,PKD2,PLCB1,SCN11A,SCN1B,SCN5A,SCN7A,SLC24A3,SLC6A15,SLC6A17,SLC8A1,SLC8A2
GO:BP	response to metal ion	GO:0010038	0.00675406	2.17043	390	1294	48	21354	ADCY1,APBB1,BACE1,CACNA1G,CACNA1H,CAV1,CNGA3,CPNE4,DLG2,DLG4,DMTN,FIBIN,FN1,FSTL3,HPCA,IGFBP2,KCNC2,KCNK3,KCNMB1,LGMN,LOXL2,MAPT,MYLK,NFATC4,NPTX1,PAM,PENK,PKD2,PLN,PTGES,PTGS2,RYR2,SCN5A,SLC25A23,SNCA,SOD3,SPARC,SYT1,SYT13,SYT15,SYT17,SYT4,SYT6,SYT9,TIGAR,TNNT2,TRPC1,TRPC3
GO:BP	regulation of G protein-coupled receptor signaling pathway	GO:0008277	0.00675991	2.17006	128	1294	23	21354	ADCYAP1,APLN,APLNR,ATP2B4,FRMPD1,GAS2L2,GPR27,GPRASP1,ITGB1,KCTD12B,MGLL,MRAP2,NECAB2,NOS1,OPRL1,PHF24,PLCB1,RAMP2,RGS4,SNCA,SSTR4,SYP,TUB
GO:BP	regulation of endothelial cell chemotaxis	GO:2001026	0.00720641	2.14228	22	1294	9	21354	FGF1,FGF18,FGF2,FGFR1,HSPB1,KDR,LGMN,PRKD1,SNAI2
GO:BP	sympathetic nervous system development	GO:0048485	0.00720641	2.14228	22	1294	9	21354	GDNF,HAND2,NRP1,NRP2,PHOX2A,PHOX2B,PLXNA4,SEMA3A,SEMA3F
GO:BP	retina vasculature development in camera-type eye	GO:0061298	0.00734094	2.13425	17	1294	8	21354	ACVRL1,ARHGEF15,CYP1B1,LAMA1,NRP1,PDGFRA,PDGFRB,RHOJ
GO:BP	mesenchymal cell development	GO:0014031	0.00745024	2.12783	85	1294	18	21354	BMP4,CDH2,EDNRA,EDNRB,FN1,GDNF,HAND2,HEY2,NRP1,NRP2,PHOX2B,SEMA3A,SEMA3F,SEMA3G,SMO,SNAI2,SOX10,TWIST1
GO:BP	regulated exocytosis	GO:0045055	0.00754467	2.12236	248	1294	35	21354	ADCY1,APBA1,BACE1,CACNA1C,CACNA1G,CACNB2,CADPS,CHRM2,CHRNA3,CHRNA5,CNR1,CPLX1,DMTN,DOC2B,FOXF1,GATA2,KCNB1,NAPB,NCS1,RAB11FIP5,RIMS3,SNAP25,SNCA,SV2A,SYN2,SYNGR1,SYNGR3,SYP,SYT1,SYT13,SYT15,SYT17,SYT4,SYT6,SYT9
GO:BP	epithelial cell differentiation	GO:0030855	0.00761492	2.11833	655	1294	70	21354	ACTA2,ACVRL1,ADAMTSL4,ANXA1,APOLD1,ATOH8,BMP4,BMP5,CAV1,CD109,CDH2,CDH3,CDH5,COL18A1,DAB2,DMD,ENG,ESR1,FAT4,FGF2,FGFR1,FLNA,FOXF1,FRMD6,FRZB,FSTL1,FZD1,FZD2,GDNF,GJA1,GLI2,GPR4,GREM1,H2AFY2,HEY2,HOXA5,HOXA7,IGF1,KRT17,LAMA1,LAMB2,LHFPL5,MYO9A,NKX3-2,OSR1,PLCB1,PODXL,PTGS2,PTK7,PTN,PTPRS,RARG,RILPL1,ROBO4,SALL1,SMO,SOX17,SOX18,SPRY1,STC1,TAGLN,TCF21,TGFB1I1,TGFB2,TIGAR,TMEM100,TMEM132E,TMOD1,WWTR1…
GO:BP	presynapse assembly	GO:0099054	0.00766768	2.11534	54	1294	14	21354	CADM1,CBLN2,CLSTN3,CNTN5,FZD1,GPC6,LRRC4B,LRRTM1,NLGN2,PCDH17,PTPRS,SLITRK3,SLITRK5,SNCA
GO:BP	synaptic vesicle exocytosis	GO:0016079	0.0077615	2.11005	129	1294	23	21354	ADCY1,APBA1,BACE1,CACNB2,CADPS,CHRM2,CHRNA3,CHRNA5,CNR1,CPLX1,DOC2B,NAPB,NCS1,RIMS3,SNAP25,SNCA,SV2A,SYP,SYT1,SYT17,SYT4,SYT6,SYT9
GO:BP	neuron recognition	GO:0008038	0.00787741	2.10362	47	1294	13	21354	AMIGO1,CCDC141,CNR1,CNTN5,CNTNAP2,CRTAC1,GAP43,NCAM2,NDN,NEXN,NRP1,ROBO1,SEMA3A
GO:BP	postsynaptic specialization organization	GO:0099084	0.00787741	2.10362	47	1294	13	21354	ARHGEF9,CADM1,CDH2,DLG2,DLG4,GAP43,LRFN1,LRRC4B,LRRTM1,MPP2,NLGN2,PTPRS,SHANK3
GO:BP	insulin-like growth factor receptor signaling pathway	GO:0048009	0.00843618	2.07385	34	1294	11	21354	BMP5,CDH3,GRB10,IGF1,IGF1R,IGFBP2,IGFBP3,IGFBP4,IGFBP5,IRS1,PLCB1
GO:BP	negative regulation of ion transmembrane transport	GO:0034766	0.00855145	2.06796	139	1294	24	21354	ATP1A2,CASQ2,CAV1,CAV3,DYSF,ESR1,FKBP1B,GRB10,HECW2,KCNAB1,KCNE4,KCNH2,NOS1,NTSR1,OPRL1,OSR1,PID1,PKD2,PLN,REM1,RGS4,TGFB2,TRDN,TWIST1
GO:BP	regulation of cardiac muscle cell membrane repolarization	GO:0099623	0.00859372	2.06582	28	1294	10	21354	CAV3,FLNA,GJA1,GJA5,KCNA5,KCNE4,KCNH2,RNF207,SCN1B,SCN5A
GO:BP	lymph vessel development	GO:0001945	0.00859372	2.06582	28	1294	10	21354	ACVRL1,CCBE1,CLEC14A,FLT4,NR2F2,PTPN14,SOX18,SVEP1,TMEM204,VASH1
GO:BP	substrate-dependent cell migration	GO:0006929	0.00859372	2.06582	28	1294	10	21354	CSPG4,FGFR1,FN1,ITGA11,MYH10,NRP1,NTN1,ROBO1,SLIT2,SNAI2
GO:BP	actin filament bundle assembly	GO:0051017	0.00883888	2.0536	168	1294	27	21354	ARHGAP6,ARHGEF15,CALD1,CTGF,DLC1,DMTN,FAM107A,FERMT2,FLNA,FMN2,KANK2,KANK4,LIMCH1,MYH10,NRP1,PDLIM4,PHACTR1,PHLDB2,PLS3,PPM1E,PPP1R9A,SHANK3,SORBS3,SYNPO2,TACR1,TGFB3,TPM1
GO:BP	regulation of neural precursor cell proliferation	GO:2000177	0.00907813	2.042	112	1294	21	21354	ADCYAP1,CDH2,CX3CR1,FAM19A1,FGF2,FLNA,GATA2,GJC2,GLI2,GLI3,GPR37L1,IGF1,LIMS2,NES,NOG,PTBP2,PTN,SLC16A2,SMO,SOX10,ZFP423
GO:BP	negative regulation of transforming growth factor beta receptor signaling pathway	GO:0030512	0.00924084	2.03429	70	1294	16	21354	ASPN,CAV1,CAV2,CD109,CIDEA,EMILIN1,FBN1,HTRA3,LTBP1,PEG10,SPRY1,TGFB1I1,TGFB3,TGFBR3,VASN,WFIKKN2
GO:BP	cell differentiation involved in kidney development	GO:0061005	0.00971606	2.01251	55	1294	14	21354	ACTA2,BMP4,FAT4,GDNF,GLI3,GPR4,GREM1,LAMB2,OSR1,PODXL,SALL1,SMO,TCF21,WWTR1
GO:BP	regulation of phospholipase activity	GO:0010517	0.00971606	2.01251	55	1294	14	21354	ADCYAP1R1,AGTR1A,ANXA1,ARHGAP6,ESR1,FGF2,FGFR1,FGFR2,FLT1,HPCA,NMUR1,PDGFRA,PDGFRB,SNCA
GO:BP	negative regulation of transmembrane transport	GO:0034763	0.00973652	2.0116	140	1294	24	21354	ATP1A2,CASQ2,CAV1,CAV3,DYSF,ESR1,FKBP1B,GRB10,HECW2,KCNAB1,KCNE4,KCNH2,NOS1,NTSR1,OPRL1,OSR1,PID1,PKD2,PLN,REM1,RGS4,TGFB2,TRDN,TWIST1
GO:BP	SA node cell to atrial cardiac muscle cell communication	GO:0086070	0.00974689	2.01113	9	1294	6	21354	ANK2,CACNA1G,GJA5,KCNA5,RYR2,SCN5A
GO:BP	SA node cell action potential	GO:0086015	0.00974689	2.01113	9	1294	6	21354	ANK2,CACNA1G,GJA5,KCNA5,RYR2,SCN5A
GO:BP	SA node cell to atrial cardiac muscle cell signaling	GO:0086018	0.00974689	2.01113	9	1294	6	21354	ANK2,CACNA1G,GJA5,KCNA5,RYR2,SCN5A
GO:BP	adult locomotory behavior	GO:0008344	0.00977712	2.00979	95	1294	19	21354	ADAM22,ATP1A2,CACNA1C,CHL1,CXCL12,GLRB,KCNJ10,LGI4,MAPT,NGF,NLGN2,NTSR1,PBX3,PREX2,SEZ6,SEZ6L,SNCA,TMOD1,UCHL1
GO:BP	salivary gland development	GO:0007431	0.00988101	2.0052	41	1294	12	21354	EDA,EDAR,FGF7,FGFR1,HGF,LAMA1,NRP1,SEMA3A,SNAI2,TGFB2,TGFB3,TWSG1
GO:BP	Rho protein signal transduction	GO:0007266	0.0101814	1.99219	131	1294	23	21354	AGTR1A,ARHGEF25,CDC42EP3,CDH13,CDH2,COL1A2,COL3A1,DLC1,EDNRA,F2R,GPR20,GPR4,ITGB1,KANK1,KANK2,NRP1,NTN1,PDGFRB,RASIP1,RHOJ,RIT2,ROBO1,STARD8
GO:BP	protein localization to synapse	GO:0035418	0.0103097	1.98675	104	1294	20	21354	ADAM22,ARHGAP44,ASIC2,CACNG4,CLSTN3,CPLX1,DLG2,DLG4,GPC6,HSPB1,KIF5A,KIF5C,LRRTM1,MAPK10,MAPT,NLGN2,NPTX1,NSG1,SHISA6,SNAP25
GO:BP	cell chemotaxis	GO:0060326	0.0105734	1.97579	317	1294	41	21354	ACKR3,ACKR4,AGTR1A,ANXA1,C3AR1,C5AR1,CX3CR1,CXCL12,CXCL14,CYP7B1,DOCK4,DYSF,EDNRA,EDNRB,ENG,FGF1,FGF18,FGF2,FGFR1,FLT1,GREM1,HGF,HSPB1,ITGA9,JAM3,KDR,LGMN,NRP1,PARVA,PDGFD,PDGFRA,PDGFRB,PLXNB3,PRKD1,PTN,SCG2,SLIT2,SNAI2,TGFB2,VEGFB,XCR1
GO:BP	dendrite development	GO:0016358	0.0105783	1.97559	284	1294	38	21354	ARHGAP44,BBS1,BMP5,CDKL5,CHRNA3,CTNNA2,DACT1,DLG4,ELAVL4,HECW2,ITGB1,KIF1A,MAP1B,MAPK8IP2,MARK1,NFATC4,NLGN2,NRP1,NTN1,NUMBL,OBSL1,PHACTR1,PPP1R9A,PREX2,PRKG1,PTN,PTPRS,RBFOX2,SDC2,SDK1,SEMA3A,SEZ6,SHANK3,SLITRK5,TANC2,TLX2,TRPC6,ZFP365
GO:BP	stem cell development	GO:0048864	0.010586	1.97527	87	1294	18	21354	BMP4,CDH2,EDNRA,EDNRB,FGF2,FN1,GDNF,HAND2,NRP1,NRP2,PHOX2B,SEMA3A,SEMA3F,SEMA3G,SMO,SNAI2,SOX10,TWIST1
GO:BP	regulation of sodium ion transmembrane transport	GO:1902305	0.0108345	1.96519	63	1294	15	21354	ATP1A2,ATP1B2,ATP2B4,CAV3,DMD,FGF13,FXYD1,FXYD6,FXYD7,HECW2,NOS1,OSR1,PLCB1,SCN1B,SCN5A
GO:BP	regulation of catecholamine secretion	GO:0050433	0.0108345	1.96519	63	1294	15	21354	CNR1,CXCL12,GABBR1,KCNA2,KCNB1,NPY2R,OPRK1,SNCA,SYT1,SYT13,SYT15,SYT17,SYT4,SYT6,SYT9
GO:BP	biomineral tissue development	GO:0031214	0.0108466	1.96471	160	1294	26	21354	ASPN,BMP4,CLEC3B,COL1A1,COL1A2,DDR2,ECM1,GJA1,GPC3,GREM1,HEY2,IGF1,LTBP3,NELL1,NOS3,OSR1,PTGS2,PTH1R,PTN,ROR2,RSPO2,SLC24A3,SLC8A1,TGFB3,TMEM119,TWIST1
GO:BP	negative regulation of epithelial cell proliferation	GO:0050680	0.0110697	1.95587	141	1294	24	21354	ACVRL1,ATOH8,BMP4,CAV1,CAV2,CD109,ENG,FGFR2,FLT1,GAS1,GJA1,GPC3,LIMS2,MAGED1,NR2F2,PTN,PTPRM,ROBO1,SFRP1,SNAI2,SPARC,TGFB2,VASH1,WFDC1
GO:BP	membrane repolarization during action potential	GO:0086011	0.0112024	1.95069	23	1294	9	21354	CAV1,FLNA,KCNA5,KCND3,KCNE4,KCNH2,KCNJ5,KCNJ8,RNF207
GO:BP	calcium ion-regulated exocytosis of neurotransmitter	GO:0048791	0.0112024	1.95069	23	1294	9	21354	CADPS,DOC2B,RIMS3,SNAP25,SYT1,SYT17,SYT4,SYT6,SYT9
GO:BP	axon extension	GO:0048675	0.0116328	1.93432	132	1294	23	21354	CDKL5,CXCL12,FN1,ITGB1,LAMB2,MAP1B,MAPT,MGLL,NDN,NGF,NRP1,NRP2,NTN1,OLFM1,PLXNA4,PTPRS,SEMA3A,SEMA3F,SEMA3G,SLIT2,SLIT3,SMO,TTL
GO:BP	regulation of sensory perception of pain	GO:0051930	0.0122373	1.91232	56	1294	14	21354	ADRA2C,EDNRB,F2R,FGFR1,KCNC4,KCNJ10,MGLL,NOS1,NPY2R,NTSR1,OPRK1,OPRL1,SCN11A,TMEM100
GO:BP	negative regulation of BMP signaling pathway	GO:0030514	0.0122373	1.91232	56	1294	14	21354	BMPER,CAV1,CHRD,CHRDL1,FBN1,FSTL3,FZD1,GREM1,GREM2,HTRA3,NOG,RBPMS2,SFRP1,TWSG1
GO:BP	neural crest cell migration	GO:0001755	0.0122373	1.91232	56	1294	14	21354	BMP4,EDNRB,FN1,GDNF,HAND2,NRP1,NRP2,PHOX2B,SEMA3A,SEMA3F,SEMA3G,SMO,SOX10,TWIST1
GO:BP	membrane depolarization during action potential	GO:0086010	0.0124055	1.90638	29	1294	10	21354	CACNA1C,CACNA1G,CACNB2,CAV3,GJA5,KCNH2,SCN11A,SCN1B,SCN5A,SCN7A
GO:BP	actin filament bundle organization	GO:0061572	0.0124619	1.90442	171	1294	27	21354	ARHGAP6,ARHGEF15,CALD1,CTGF,DLC1,DMTN,FAM107A,FERMT2,FLNA,FMN2,KANK2,KANK4,LIMCH1,MYH10,NRP1,PDLIM4,PHACTR1,PHLDB2,PLS3,PPM1E,PPP1R9A,SHANK3,SORBS3,SYNPO2,TACR1,TGFB3,TPM1
GO:BP	enteric nervous system development	GO:0048484	0.0125105	1.90273	18	1294	8	21354	EDNRA,EDNRB,GDNF,HLX,PHOX2A,PHOX2B,SOX10,TLX2
GO:BP	anatomical structure arrangement	GO:0048532	0.0125105	1.90273	18	1294	8	21354	DMD,HOXB2,KCNA2,NRP1,NRP2,PLXNA4,SEMA3A,SEMA3F
GO:BP	cellular response to hypoxia	GO:0071456	0.0125673	1.90076	142	1294	24	21354	AK4,CPEB1,EIF4EBP1,FMN2,FNDC1,KCND2,KCNK2,KCNK3,KCNMB1,NOL3,PTGIS,PTGS2,PTN,RORA,S100B,SFRP1,SLC29A1,SLC2A4,SLC8A1,STC1,TIGAR,TRPC6,TWIST1,VASN
GO:BP	glomerular capillary formation	GO:0072104	0.0128395	1.89145	6	1294	5	21354	BMP4,NOTCH3,PDGFRA,PDGFRB,TCF21
GO:BP	glomerulus vasculature morphogenesis	GO:0072103	0.0128395	1.89145	6	1294	5	21354	BMP4,NOTCH3,PDGFRA,PDGFRB,TCF21
GO:BP	positive regulation of calcium ion transmembrane transporter activity	GO:1901021	0.0130741	1.88359	42	1294	12	21354	AKAP6,ANK2,BMP4,CACNB2,CASQ1,HSPA2,JPH2,P2RY6,PKD2,RYR2,STAC,TRDN
GO:BP	regulation of cell-substrate junction organization	GO:0150116	0.0133648	1.87404	64	1294	15	21354	ACVRL1,APOD,ARHGAP6,COL16A1,DLC1,DMTN,EFNA5,FAM107A,FERMT2,GREM1,KDR,LIMCH1,NRP1,PHLDB2,TEK
GO:BP	long-term synaptic potentiation	GO:0060291	0.0139809	1.85446	106	1294	20	21354	ADCY1,CALB2,CX3CR1,FAM107A,GFAP,LGMN,LRRTM1,MPP2,MUSK,NFATC4,NOS1,NSG1,PPP1R9A,PTN,S100B,SERPINE2,SHANK3,SLC8A2,SNAP25,SNCA
GO:BP	positive regulation of canonical Wnt signaling pathway	GO:0090263	0.0139809	1.85446	106	1294	20	21354	ADGRA2,CAV1,CDH3,COL1A1,DAAM2,DACT1,DKK2,EDA,FGF2,GPC3,GPRC5B,KANK1,PLEKHA4,PTK7,RECK,ROR2,RSPO2,RSPO3,SFRP1,WLS
GO:BP	sodium ion transport	GO:0006814	0.0146286	1.8348	234	1294	33	21354	ASIC2,ASIC4,ATP1A2,ATP1B2,ATP2B4,CACNA1G,CAV3,CNTN1,DMD,DMPK,FGF13,FXYD1,FXYD6,FXYD7,HECW2,NOS1,NOS3,OSR1,PKD2,PLCB1,SCN11A,SCN1B,SCN5A,SCN7A,SERPINE2,SLC10A4,SLC10A6,SLC24A3,SLC5A7,SLC6A15,SLC6A17,SLC8A1,SLC8A2
GO:BP	regulation of sensory perception	GO:0051931	0.0153233	1.81465	57	1294	14	21354	ADRA2C,EDNRB,F2R,FGFR1,KCNC4,KCNJ10,MGLL,NOS1,NPY2R,NTSR1,OPRK1,OPRL1,SCN11A,TMEM100
GO:BP	regulation of axonogenesis	GO:0050770	0.0155841	1.80732	173	1294	27	21354	AMIGO1,BRSK1,BRSK2,CDH2,CDKL5,CHN1,CHODL,CXCL12,EFNA5,EPHA7,FN1,LRRC4C,MAP1B,MAPT,NEFL,NGF,NRP1,NTN1,PLXNA4,PLXNB3,PTPRS,RGMA,ROBO1,SEMA3A,SEMA3F,SEMA3G,SLIT2
GO:BP	neural crest cell development	GO:0014032	0.0159439	1.79741	81	1294	17	21354	BMP4,CDH2,EDNRA,EDNRB,FN1,GDNF,HAND2,NRP1,NRP2,PHOX2B,SEMA3A,SEMA3F,SEMA3G,SMO,SNAI2,SOX10,TWIST1
GO:BP	negative regulation of cell adhesion	GO:0007162	0.0160333	1.79498	289	1294	38	21354	ACVRL1,ADAMTS18,ANGPT1,ANXA1,APOD,ARHGAP6,BMP4,CCM2L,CDH13,COL1A1,CXCL12,CYP1B1,DLC1,DMTN,EFNA5,FAM107A,GLI3,HLX,HOXA7,HSPB1,JAM2,JAM3,KANK1,LAMB1,LRRC32,MMP2,PHLDB2,PLXNA4,PLXNB3,PODXL,POSTN,PRKG1,SERPINE2,SNAI2,SPOCK1,SPRY4,TNC,TWSG1
GO:BP	lung morphogenesis	GO:0060425	0.016409	1.78492	65	1294	15	21354	BMP4,FGF7,FOXF1,FOXP2,HHIP,HOXA5,IGF1,LAMA1,NOG,PDGFRA,RSPO2,SPRY1,TCF21,TNC,WNT2B
GO:BP	pathway-restricted SMAD protein phosphorylation	GO:0060389	0.016409	1.78492	65	1294	15	21354	ACVRL1,BMP4,BMP5,BMPER,CERS1,DAB2,EMILIN1,ENG,GDF10,GREM1,NOG,RBPMS,TGFB2,TGFBR3,TWSG1
GO:BP	positive regulation of secretion by cell	GO:1903532	0.0165511	1.78117	334	1294	42	21354	ADCYAP1,APBB1,APLN,C1QTNF3,CACNA1B,CACNA1G,CACNB2,CADPS,CNR1,CXCL12,DOC2B,FGFR1,FRMD4A,GABBR1,GAL,GATA2,GJA1,GPR27,IGF1,KCNB1,LEPR,MYH10,MYOM1,NCS1,NELL2,NLGN2,NPY2R,NTSR1,OPRK1,PFKM,PTGES,RASL10B,SNAP25,SNCA,SYT1,SYT4,SYT9,TACR1,TACR2,TGFB2,TGFB3,WLS
GO:BP	prostate gland development	GO:0030850	0.0167611	1.7757	50	1294	13	21354	ANXA1,BMP4,CYP7B1,ESR1,GLI2,GLI3,ID4,IGF1,MMP2,NOG,RARG,SFRP1,TNC
GO:BP	cranial nerve development	GO:0021545	0.0167611	1.7757	50	1294	13	21354	ADARB1,DMD,GLI3,HOXB2,KCNA2,NRP1,NRP2,PHOX2A,PHOX2B,PLXNA4,SEMA3A,SEMA3F,TIFAB
GO:BP	response to calcium ion	GO:0051592	0.0168354	1.77378	154	1294	25	21354	ADCY1,CAV1,CPNE4,DMTN,HPCA,KCNMB1,LGMN,MYLK,PENK,PKD2,PTGES,RYR2,SCN5A,SLC25A23,SPARC,SYT1,SYT13,SYT15,SYT17,SYT4,SYT6,SYT9,TNNT2,TRPC1,TRPC3
GO:BP	heart valve morphogenesis	GO:0003179	0.0171399	1.76599	43	1294	12	21354	BMP4,DCHS1,EMILIN1,GJA5,HEY2,NOS3,OLFM1,SLIT2,SLIT3,TGFB2,TWIST1,ZFPM2
GO:BP	cellular response to vitamin	GO:0071295	0.0175998	1.75449	30	1294	10	21354	COL1A1,GDAP1,KANK2,MN1,PENK,POSTN,PTN,SFRP1,SNAI2,TNC
GO:BP	negative regulation of cellular component organization	GO:0051129	0.0185345	1.73202	748	1294	76	21354	ACVRL1,ANTXR1,APOD,ARHGAP44,ARHGAP6,ARHGEF15,BMP4,CAV1,CAV3,CDH5,CHADL,CLIP3,CRYAB,CSPG4,CTNNA2,DACT1,DLC1,DLG4,DMTN,EFEMP1,EIF4EBP1,EMILIN1,EPHA7,ESR1,FAM107A,FEZ1,FGF13,FHOD3,FLNA,GAS2L2,GFAP,HGF,HSPA2,IGF1,ITGB1,JAM3,KANK1,KANK2,KANK4,LMOD1,LRRTM1,MAP1B,MAPT,NECAB2,NFATC4,NOL3,NR2F1,NRP1,NTN1,PHLDB2,PLEKHH2,PLXNB3,PPP1R9A,PTN,PTPRS,RGMA,RIT2,RTN4RL2,RUNX1T1,SEMA3A,SEMA3F,SEMA3G,SHANK3,SLIT2,SN…
GO:BP	negative regulation of cell growth	GO:0030308	0.0188792	1.72402	195	1294	29	21354	ACVRL1,APBB1,CAV3,CRYAB,DACT3,DCBLD2,EPHA7,FRZB,GAS1,GJA1,GREM1,NRP1,NTN1,P3H1,PI16,PTPRS,RERG,RGMA,RGS4,SEMA3A,SEMA3F,SEMA3G,SERPINE2,SFRP1,SLIT2,SLIT3,SOX17,TGFB2,TRO
GO:BP	regulation of cardiac muscle tissue growth	GO:0055021	0.0189901	1.72147	82	1294	17	21354	AKAP6,CAV3,COL14A1,FGF2,FGFR1,GJA1,HEY2,IGF1,KCNK2,MEIS1,NOG,PI16,RGS4,SLC25A4,TBX2,WISP1,ZFPM2
GO:BP	eye morphogenesis	GO:0048592	0.0193153	1.7141	165	1294	26	21354	ALDH1A3,BMP4,CFH,CNGA3,COL5A1,COL5A2,COL8A1,COL8A2,EFEMP1,FBN1,FGF2,FJX1,FOXF2,GAS1,GLI3,MEIS1,MFAP2,OBSL1,PTN,PTPRM,RARG,SDK1,SDK2,TBX2,TWIST1,ZEB1
GO:BP	calcium-ion regulated exocytosis	GO:0017156	0.0200557	1.69776	66	1294	15	21354	CACNA1C,CACNA1G,CADPS,DOC2B,KCNB1,RIMS3,SNAP25,SYN2,SYT1,SYT13,SYT15,SYT17,SYT4,SYT6,SYT9
GO:BP	potassium ion export across plasma membrane	GO:0097623	0.0204599	1.6891	19	1294	8	21354	KCNA2,KCNA5,KCNB1,KCND3,KCNE4,KCNH2,KCNIP2,KCNT2
GO:BP	membrane repolarization during cardiac muscle cell action potential	GO:0086013	0.0204599	1.6891	19	1294	8	21354	FLNA,KCNA5,KCND3,KCNE4,KCNH2,KCNJ5,KCNJ8,RNF207
GO:BP	positive regulation of release of sequestered calcium ion into cytosol	GO:0051281	0.0222747	1.65219	44	1294	12	21354	AKAP6,APLNR,CASQ1,EDNRA,F2R,JPH2,NTSR1,P2RY6,PKD2,SNCA,TRDN,TRPC1
GO:BP	positive regulation of protein metabolic process	GO:0051247	0.0223666	1.6504	1529	1294	134	21354	ACVRL1,ADCYAP1,ADRA2B,ADRA2C,AFAP1L2,AGTR1A,AKAP6,ANGPT1,ANTXR1,APLNR,ATP2B4,BAG2,BBS7,BMP4,BMP5,C1QTNF2,C1QTNF9,CASP12,CAV1,CAV2,CCBE1,CDH5,CERS1,CHRNA3,CLIP3,CNTN1,CPEB1,CSPG4,CTGF,CX3CR1,CYP1B1,DAB2,DACT1,DAPK1,DDR2,DLC1,DLG4,EDNRA,EDNRB,EFNA5,ENG,EPHA7,F2R,F3,FAM107A,FAM129A,FBN1,FERMT2,FGF1,FGF13,FGF18,FGF2,FGF7,FGFR1,FLT1,FLT4,FN1,FNDC1,FZD1,GDF10,GDNF,GFRA1,GJA1,GPC3,GPRC5B,GREM1,HECW2,HGF…
GO:BP	facial nerve structural organization	GO:0021612	0.0231113	1.63618	10	1294	6	21354	HOXB2,NRP1,NRP2,PLXNA4,SEMA3A,SEMA3F
GO:BP	appendage morphogenesis	GO:0035107	0.0238695	1.62216	157	1294	25	21354	BMP4,CACNA1C,FGFR1,FREM2,GAS1,GJA1,GJA5,GLI2,GLI3,GPC3,GREM1,HAND2,MUSTN1,NOG,OSR1,RARG,RECK,ROR2,RSPO2,SALL1,TBX2,TGFB2,TWIST1,WNT9A,ZBTB16
GO:BP	limb morphogenesis	GO:0035108	0.0238695	1.62216	157	1294	25	21354	BMP4,CACNA1C,FGFR1,FREM2,GAS1,GJA1,GJA5,GLI2,GLI3,GPC3,GREM1,HAND2,MUSTN1,NOG,OSR1,RARG,RECK,ROR2,RSPO2,SALL1,TBX2,TGFB2,TWIST1,WNT9A,ZBTB16
GO:BP	positive regulation of osteoblast differentiation	GO:0045669	0.0239167	1.6213	75	1294	16	21354	BMP4,DDR2,FERMT2,FGF2,GDF10,GLI3,IGF1,LRP3,NELL1,NPNT,PDLIM7,PRKD1,SCUBE2,TMEM119,WISP1,WWTR1
GO:BP	endothelial cell chemotaxis	GO:0035767	0.0245735	1.60953	31	1294	10	21354	FGF1,FGF18,FGF2,FGFR1,HSPB1,KDR,LGMN,NRP1,PRKD1,SNAI2
GO:BP	bone growth	GO:0098868	0.0245735	1.60953	31	1294	10	21354	BNC2,DDR2,ECM1,EVC,FBLN5,FGFR2,LEPR,RARG,STC1,THBS3
GO:BP	peptidyl-tyrosine modification	GO:0018212	0.0256198	1.59142	386	1294	46	21354	AATK,AFAP1L2,AGTR1A,ANGPT1,AXL,CADM4,CAV1,CAV2,CNTN1,CSPG4,DDR2,DLG4,DMTN,EDNRA,EFEMP1,EFNA5,EPHA7,FGF7,FGFR1,FGFR2,FLT1,FLT4,GDNF,GFRA1,GPRC5B,GREM1,HGF,IGF1,IGF1R,ITGB1,KDR,MUSK,NRP1,PDGFD,PDGFRA,PDGFRB,PLPP3,PTK7,ROR1,ROR2,SFRP1,TEK,TIE1,TTL,VEGFB,VTN
GO:BP	actin filament organization	GO:0007015	0.0258293	1.58789	445	1294	51	21354	ARHGAP6,ARHGEF15,CALD1,CAP2,CAV3,CDC42EP3,CFL2,CTGF,CTNNA2,DLC1,DMTN,EFS,ENAH,FAM107A,FERMT2,FHOD3,FLNA,FMN2,GAS2L2,HIP1,JMY,KANK1,KANK2,KANK4,KIRREL,LIMCH1,LMOD1,MYH10,NRP1,PDLIM3,PDLIM4,PHACTR1,PHLDB2,PLEKHH2,PLS3,PPM1E,PPP1R9A,RGS4,SHANK3,SHROOM4,SLIT2,SORBS2,SORBS3,SYNPO2,TACR1,TGFB3,TMOD1,TNNT2,TPM1,TPM2,WASF3
GO:BP	muscle organ morphogenesis	GO:0048644	0.0266902	1.57365	84	1294	17	21354	ADARB1,ANGPT1,CCM2L,COL3A1,ENG,EPOR,FZD1,FZD2,HAND1,HEY2,MYLK,NOG,RYR2,TGFB2,TNNT2,TPM1,ZFPM2
GO:BP	odontogenesis	GO:0042476	0.0267041	1.57342	129	1294	22	21354	ASPN,BMP4,COL1A1,EDA,EDAR,EDNRA,GAS1,GLI2,GLI3,GNAO1,HAND1,HAND2,LAMB1,NKX2-3,OSR1,PAM,PDGFRA,RSPO2,SMO,SSU2,TNC,TWIST1
GO:BP	endothelium development	GO:0003158	0.0267041	1.57342	129	1294	22	21354	ACVRL1,APOLD1,ATOH8,BMP4,CDH5,COL18A1,DMD,ENG,FGF1,FSTL1,GJA1,GJA5,HEY2,PLCB1,PTN,PTPRS,ROBO4,SOX17,SOX18,STC1,TMEM100,ZEB1
GO:BP	regulation of neurotransmitter secretion	GO:0046928	0.0280197	1.55254	120	1294	21	21354	ADCY1,APBA1,BACE1,CACNA1B,CACNB2,CHRM2,CHRNA3,CHRNA5,CNR1,CPLX1,KCNC4,NCS1,NGF,PPP1R9A,RIMS3,SNCA,SNCAIP,SYP,SYT1,SYT4,TACR2
GO:BP	regulation of organ growth	GO:0046620	0.0280197	1.55254	120	1294	21	21354	AKAP6,CACNA1C,CAV3,COL14A1,FGF2,FGFR1,GJA1,HEY2,HLX,IGF1,KCNK2,MEIS1,NOG,PI16,RGS4,SLC25A4,SMO,TBX2,WISP1,WWC2,ZFPM2
GO:BP	neurotransmitter uptake	GO:0001504	0.0283501	1.54745	38	1294	11	21354	ATP1A2,GDNF,GFAP,ITGB1,KCNJ10,NOS1,RAB3B,SLC18A2,SLC29A1,SNCA,SYNGR3
GO:BP	regulation of phosphatidylinositol 3-kinase signaling	GO:0014066	0.0283585	1.54732	93	1294	18	21354	ANGPT1,DCN,F2R,FBXL2,FLT1,HGF,IGF1,KDR,PDGFD,PDGFRB,PIK3IP1,ROR1,ROR2,SELP,SERPINE2,TEK,TGFB2,TWIST1
GO:BP	response to axon injury	GO:0048678	0.0283585	1.54732	93	1294	18	21354	APOD,CHL1,FGF2,FKBP1B,FLNA,GAP43,JAM3,KCNK2,LAMB2,MAP1B,MMP2,MORN4,NEFL,PTN,PTPRS,RGMA,RTN4RL2,TNC
GO:BP	epithelial cell differentiation involved in kidney development	GO:0035850	0.0287092	1.54198	45	1294	12	21354	ACTA2,BMP4,FAT4,GDNF,GPR4,GREM1,LAMB2,OSR1,PODXL,SALL1,SMO,WWTR1
GO:BP	positive regulation of secretion	GO:0051047	0.0293155	1.5329	388	1294	46	21354	ADCYAP1,APBB1,APLN,C1QTNF3,CACNA1B,CACNA1G,CACNB2,CADPS,CNR1,CXCL12,DOC2B,EDNRB,FGFR1,FRMD4A,GABBR1,GAL,GATA2,GJA1,GPR27,IGF1,KCNB1,LEPR,MYH10,MYOM1,NCS1,NELL2,NLGN2,NPY2R,NTSR1,OPRK1,OPRL1,PFKM,PLA2R1,PTGES,RASL10B,SNAP25,SNCA,SSTR4,SYT1,SYT4,SYT9,TACR1,TACR2,TGFB2,TGFB3,WLS
GO:BP	positive regulation of cellular component biogenesis	GO:0044089	0.0315768	1.50063	533	1294	58	21354	ADGRB2,ADGRL1,ADGRL3,AMIGO1,ARHGEF15,ASIC2,CALY,CAV1,CAV3,CBLN2,CDC42EP3,CDH5,CLSTN2,CLSTN3,COL16A1,CTGF,CTNNA2,DZIP1,EFNA5,EMILIN1,ESR1,FERMT2,FLNA,FLRT2,FMN2,JMY,KCTD17,KDR,KIRREL,LDB2,LIMCH1,LMOD1,LRRC4B,LRRN3,LRRTM1,MAP1B,MAPT,MUSK,NLGN2,NPHP1,NRP1,PDLIM4,PHLDB2,PPM1E,RASIP1,SLITRK3,SLITRK5,SNCA,SORBS3,SRPX2,SYNDIG1,SYNPO2,TACR1,TEK,TGFB3,THBS2,TPM1,WASF3
GO:BP	cell proliferation in hindbrain	GO:0021534	0.0322877	1.49096	20	1294	8	21354	C5AR1,FGF2,GLI2,GPR37L1,IGF1,RORA,SMO,ZFP423
GO:BP	cellular response to nitrogen compound	GO:1901699	0.032902	1.48278	709	1294	72	21354	ADCY5,AGTR1A,AKAP6,AMIGO1,ATP2B4,BACE1,C1QTNF9,CACNB1,CALY,CASQ2,CAV1,CAV2,CAV3,CHRM2,CHRNA3,COL16A1,COL1A1,COL1A2,COL3A1,COL5A2,COL6A1,COLEC12,CPEB1,DMTN,EIF4EBP1,ENHO,FBN1,FLNA,GABRB3,GCGR,GJA1,GLP2R,GNAO1,GPR173,GRB10,GRB14,HTR3A,HTR3B,IGF1,IGF1R,IGFBP5,IRS1,KANK1,KCNC2,KCNQ3,LGMN,LY6C1,MAP1B,MMP2,NOS1,NSG1,NSG2,P2RY6,PDGFD,PDGFRA,PENK,PID1,PKD2,PLCB1,PTGER1,PTGS2,RAB12,RGS4,RRAGB,RYR2,SFRP1,S…
GO:BP	cochlea development	GO:0090102	0.0335278	1.47459	53	1294	13	21354	DCHS1,FRZB,FZD2,GABRB3,GATA2,GLI2,HEY2,KCNK2,KCNK3,PTK7,SOBP,TIFAB,ZEB1
GO:BP	digestive tract morphogenesis	GO:0048546	0.0335278	1.47459	53	1294	13	21354	BMP4,DACT1,FOXF1,GLI2,GLI3,HLX,NKX2-3,PDGFRA,RBPMS2,SFRP1,SOX10,SOX17,TCF21
GO:BP	regulation of kidney development	GO:0090183	0.0338083	1.47098	32	1294	10	21354	AGTR1A,BMP4,EDNRA,GDNF,GREM1,MAGED1,NOG,OSR1,SMO,WNT2B
GO:BP	positive regulation of potassium ion transmembrane transporter activity	GO:1901018	0.0338083	1.47098	32	1294	10	21354	AKAP6,AMIGO1,ANK2,ATP1B2,GAL,GALR2,KCNC2,LRRC55,PRKG1,RNF207
GO:BP	exploration behavior	GO:0035640	0.0338083	1.47098	32	1294	10	21354	ATP1A2,CHL1,DLG4,GABRB3,JPH3,LRRTM1,LSAMP,NLGN2,PENK,SHANK3
GO:BP	spontaneous synaptic transmission	GO:0098814	0.0342835	1.46491	15	1294	7	21354	CBLN2,DOC2B,ITGB1,NSG1,PPP1R9A,RPH3A,SYT1
GO:BP	regulation of Ras protein signal transduction	GO:0046578	0.0355725	1.44889	191	1294	28	21354	ARHGAP44,ARHGEF25,CADM4,CDH2,COL3A1,DLC1,F2R,GPR20,GPR4,IGF1,ITGB1,KANK1,KANK2,MMD2,NGF,NRP1,PDGFRB,PSD,PSD3,RASIP1,RIT2,ROBO1,SPRY1,SPRY4,STARD8,STMN3,TGFB2,TIMP2
GO:BP	aorta development	GO:0035904	0.0357048	1.44727	61	1294	14	21354	ACVRL1,COL3A1,ENG,FKBP10,HEY2,LOXL1,LTBP1,MYH10,MYLK,PDGFRB,PKD2,PRICKLE1,TBX2,TGFB2
GO:BP	positive regulation of phospholipase activity	GO:0010518	0.0367131	1.43518	46	1294	12	21354	ADCYAP1R1,AGTR1A,ARHGAP6,ESR1,FGF2,FGFR1,FGFR2,FLT1,HPCA,NMUR1,PDGFRA,PDGFRB
GO:BP	ventral trunk neural crest cell migration	GO:0036486	0.0372927	1.42838	4	1294	4	21354	NRP1,NRP2,SEMA3A,SEMA3F
GO:BP	trunk neural crest cell migration	GO:0036484	0.0372927	1.42838	4	1294	4	21354	NRP1,NRP2,SEMA3A,SEMA3F
GO:BP	trunk segmentation	GO:0035290	0.0372927	1.42838	4	1294	4	21354	NRP1,NRP2,SEMA3A,SEMA3F
GO:BP	sympathetic neuron projection extension	GO:0097490	0.0372927	1.42838	4	1294	4	21354	NRP1,NRP2,SEMA3A,SEMA3F
GO:BP	sympathetic neuron projection guidance	GO:0097491	0.0372927	1.42838	4	1294	4	21354	NRP1,NRP2,SEMA3A,SEMA3F
GO:BP	regulation of presynapse assembly	GO:1905606	0.0373357	1.42788	39	1294	11	21354	CBLN2,CLSTN3,FZD1,GPC6,LRRC4B,LRRTM1,NLGN2,PTPRS,SLITRK3,SLITRK5,SNCA
GO:BP	negative regulation of potassium ion transport	GO:0043267	0.0373357	1.42788	39	1294	11	21354	ADCYAP1,CASQ2,CAV1,CAV3,KCNAB1,KCNE4,KCNH2,NOS1,NOS3,PLCB4,RGS4
GO:BP	regulation of cell death	GO:0010941	0.0378282	1.42218	1770	1294	150	21354	ACKR3,ADAMTSL4,ADCYAP1,ADCYAP1R1,AGTR1A,AKAP12,ALDH1A3,ANGPT1,ANK2,ANXA1,APBB1,ASIC2,AXL,BACE1,BDKRB2,BMP4,C5AR1,C6,CASP12,CAV1,CD248,CDH5,CHL1,CIDEA,CLIP3,CNR1,CNTFR,COL18A1,CRYAB,CTGF,CX3CR1,CXCL12,CYP1B1,DAB2,DAPK1,DBH,DLC1,EDNRA,EDNRB,EEF1A2,EPHA7,EPOR,ESR1,F2R,FAIM2,FERMT2,FGF2,FGFR1,FLNA,FLT4,FMN2,FN1,FNDC1,FRZB,FSTL1,FZD1,GABRB3,GAL,GAS1,GATA2,GDNF,GJA1,GLI2,GLI3,GPR37,GPR37L1,GREM1,HAND2,…
GO:BP	regulation of actin filament bundle assembly	GO:0032231	0.0380162	1.42003	113	1294	20	21354	ARHGAP6,ARHGEF15,CTGF,DLC1,FERMT2,FLNA,KANK2,KANK4,LIMCH1,NRP1,PDLIM4,PHLDB2,PPM1E,PPP1R9A,SHANK3,SORBS3,SYNPO2,TACR1,TGFB3,TPM1
GO:BP	positive regulation of neuron differentiation	GO:0045666	0.0380162	1.42003	113	1294	20	21354	ADRA2B,ADRA2C,BEND6,BMP4,CXCL12,DMD,FEZ1,FGFR1,GATA2,GLI2,GPRC5B,ITGB1,MAP1B,MMD2,NGF,PHOX2B,RGS6,TIMP2,TRPC6,ZEB1
GO:BP	protein localization to cell periphery	GO:1990778	0.0381466	1.41854	357	1294	43	21354	ADAM22,ANK1,ANK2,ARHGAP44,ATP2B4,BBS1,CACNB2,CACNG4,CAV3,CDH2,CLIP3,CPLX1,DAB2,DCHS1,DLG2,DLG4,DPP10,DPP6,EHD2,FGF13,FLNA,GNAI1,GPC6,ITGB1,KCNB1,KCNIP4,LIN7B,MAPK10,MRAP2,NKD2,NPTX1,NSG1,PID1,RAB12,RAB3B,RAB3C,RAMP2,RILPL1,SHISA6,SNAP25,STAC,TMEM88,TUB
GO:BP	response to fibroblast growth factor	GO:0071774	0.0387986	1.41118	104	1294	19	21354	APLN,COL1A1,CTGF,FAT4,FGF1,FGF18,FGF2,FGF7,FGFR1,FGFR2,FLRT2,HHIP,NOG,POSTN,SFRP1,SNCA,SPRY1,SPRY4,TNC
GO:BP	cellular response to decreased oxygen levels	GO:0036294	0.0414992	1.38196	152	1294	24	21354	AK4,CPEB1,EIF4EBP1,FMN2,FNDC1,KCND2,KCNK2,KCNK3,KCNMB1,NOL3,PTGIS,PTGS2,PTN,RORA,S100B,SFRP1,SLC29A1,SLC2A4,SLC8A1,STC1,TIGAR,TRPC6,TWIST1,VASN
GO:BP	regulation of signaling receptor activity	GO:0010469	0.0417156	1.3797	162	1294	25	21354	ADRA2B,ADRA2C,CACNG4,CAV3,CNRIP1,DAPK1,DKK2,DKK3,DLG4,FAM19A1,GREM1,GREM2,ITGB1,LY6C1,MAPK8IP2,NLGN2,NOG,NPTX1,NPTX2,NPTXR,PLAU,RPH3A,SHANK3,SHISA6,WFIKKN2
GO:BP	peptide cross-linking via chondroitin 4-sulfate glycosaminoglycan	GO:0019800	0.0426804	1.36977	7	1294	5	21354	BGN,DCN,EGFLAM,SPOCK2,SPOCK3
GO:BP	peripheral nervous system axon regeneration	GO:0014012	0.0426804	1.36977	7	1294	5	21354	APOD,MAP1B,MMP2,NEFL,TNC
GO:BP	regulation of heart growth	GO:0060420	0.0435015	1.3615	87	1294	17	21354	AKAP6,CAV3,COL14A1,FGF2,FGFR1,GJA1,HEY2,IGF1,KCNK2,MEIS1,NOG,PI16,RGS4,SLC25A4,TBX2,WISP1,ZFPM2
GO:BP	regulation of pathway-restricted SMAD protein phosphorylation	GO:0060393	0.0435693	1.36082	62	1294	14	21354	ACVRL1,BMP4,BMP5,BMPER,CERS1,DAB2,EMILIN1,ENG,GDF10,GREM1,NOG,RBPMS,TGFB2,TWSG1
GO:BP	cellular component biogenesis	GO:0044085	0.0435711	1.3608	2965	1294	232	21354	ABLIM2,ABLIM3,ACVRL1,ADGRB2,ADGRL1,ADGRL3,ADGRL4,ALDH1A3,AMIGO1,ANGPT1,ANK2,ANTXR1,APBA1,APOD,ARHGAP44,ARHGAP6,ARHGEF15,ARHGEF9,ASIC2,ATL1,BBS1,BBS7,CADM1,CADPS,CALD1,CALY,CASQ1,CASQ2,CAV1,CAV2,CAV3,CBLN2,CC2D2A,CCDC65,CDC42EP3,CDH11,CDH13,CDH19,CDH2,CDH5,CDH6,CDKL5,CDS2,CELF4,CELF6,CFL2,CHRNA3,CLIP3,CLSTN2,CLSTN3,CNTN5,COL16A1,COL1A2,CPEB1,CRYAB,CSPG4,CSRP1,CTGF,CTNNA2,CXCL12,DACT1,DCHS1,DLC1,DL…
GO:BP	regulation of small GTPase mediated signal transduction	GO:0051056	0.044753	1.34918	225	1294	31	21354	ADCYAP1R1,ARHGAP44,ARHGEF25,CADM4,CDH2,CHN1,COL3A1,DLC1,F2R,GPR20,GPR4,IGF1,ITGB1,KANK1,KANK2,MMD2,NGF,NRP1,PDGFRB,PSD,PSD3,RASIP1,RIT2,ROBO1,SLIT2,SPRY1,SPRY4,STARD8,STMN3,TGFB2,TIMP2
GO:BP	peptidyl-tyrosine phosphorylation	GO:0018108	0.0457651	1.33947	383	1294	45	21354	AATK,AFAP1L2,AGTR1A,ANGPT1,AXL,CADM4,CAV1,CAV2,CNTN1,CSPG4,DDR2,DLG4,DMTN,EDNRA,EFEMP1,EFNA5,EPHA7,FGF7,FGFR1,FGFR2,FLT1,FLT4,GDNF,GFRA1,GPRC5B,GREM1,HGF,IGF1,IGF1R,ITGB1,KDR,MUSK,NRP1,PDGFD,PDGFRA,PDGFRB,PLPP3,PTK7,ROR1,ROR2,SFRP1,TEK,TIE1,VEGFB,VTN
GO:BP	heart trabecula morphogenesis	GO:0061384	0.045883	1.33835	33	1294	10	21354	ADAMTS1,ADGRG6,BMP5,CAV3,CCM2L,ENG,HEY2,NOG,TEK,TGFB2
GO:BP	protein localization to membrane	GO:0072657	0.0459585	1.33763	577	1294	61	21354	ADAM22,ANK1,ANK2,ARHGAP44,ARHGEF9,ATP2B4,BBS1,CACNB1,CACNB2,CACNG4,CAV3,CDH2,CLIP3,CPLX1,DAB2,DCHS1,DLG2,DLG4,DMTN,DPP10,DPP6,EHD2,FERMT2,FGF13,FLNA,FRMPD1,GLRB,GPC3,GPC6,HPCA,ITGB1,KCNB1,KCNIP4,LIN7B,MAPK10,MRAP2,MUSK,NACAD,NECAB2,NKD2,NLGN2,NPTX1,NSG1,PID1,PTN,RAB12,RAB3B,RAB3C,RAMP2,REEP2,RILPL1,SGTB,SHANK3,SHISA6,SNAP25,SORBS2,STAC,TCAF1,TMEM88,TRAM1L1,TUB
GO:BP	positive regulation of chemotaxis	GO:0050921	0.0464388	1.33312	153	1294	24	21354	ARTN,C3AR1,C5AR1,CDH13,CXCL12,CXCL14,DYSF,EDNRA,FGF18,FGF2,FGFR1,FN1,HSPB1,KDR,LGMN,NRP1,PDGFD,PDGFRB,PRKD1,PTN,SCG2,SLIT2,SNAI2,VEGFB
GO:BP	negative regulation of phosphate metabolic process	GO:0045936	0.0473064	1.32508	528	1294	57	21354	ADARB1,ANGPT1,BDKRB2,BMP4,CADM4,CAV1,CAV3,CCDC8,CD109,DLG2,DMD,DMTN,EMILIN1,ENG,FAM129A,FAM212B,FKBP1B,GRB10,GREM1,HGF,HPCA,HSPB1,IGF1,IGF1R,IGFBP3,KIRREL,MAPK8IP1,MAPT,MYOCD,NOG,NOS1,NR2F2,PARVA,PHACTR1,PHACTR2,PID1,PIK3IP1,PKIA,PLPP3,PPM1E,PRKAR1B,PRKAR2B,PRKG1,PTN,PTPRB,RASIP1,SFRP1,SLC7A14,SLIT2,SNCA,SPRY1,SPRY4,TGFB2,TIGAR,TWIST1,UCHL1,WWTR1
GO:BP	negative regulation of phosphorus metabolic process	GO:0010563	0.0473064	1.32508	528	1294	57	21354	ADARB1,ANGPT1,BDKRB2,BMP4,CADM4,CAV1,CAV3,CCDC8,CD109,DLG2,DMD,DMTN,EMILIN1,ENG,FAM129A,FAM212B,FKBP1B,GRB10,GREM1,HGF,HPCA,HSPB1,IGF1,IGF1R,IGFBP3,KIRREL,MAPK8IP1,MAPT,MYOCD,NOG,NOS1,NR2F2,PARVA,PHACTR1,PHACTR2,PID1,PIK3IP1,PKIA,PLPP3,PPM1E,PRKAR1B,PRKAR2B,PRKG1,PTN,PTPRB,RASIP1,SFRP1,SLC7A14,SLIT2,SNCA,SPRY1,SPRY4,TGFB2,TIGAR,TWIST1,UCHL1,WWTR1
GO:BP	regulation of actin cytoskeleton organization	GO:0032956	0.0479723	1.31901	372	1294	44	21354	ARHGAP44,ARHGAP6,ARHGEF15,CAV3,CDC42EP3,CFL2,CTGF,CTNNA2,DLC1,DMTN,EFNA5,FAM107A,FERMT2,FHOD3,FLNA,FMN2,JAM3,JMY,KANK1,KANK2,KANK4,KIRREL,LIMCH1,LMOD1,NRP1,PAM,PDGFRB,PDLIM4,PHLDB2,PLEKHH2,PPM1E,PPP1R9A,RGS4,SHANK3,SLIT2,SORBS3,SYNPO2,TACR1,TEK,TGFB2,TGFB3,TMOD1,TPM1,WASF3
GO:BP	positive regulation of cerebellar granule cell precursor proliferation	GO:0021940	0.0482271	1.31671	11	1294	6	21354	FGF2,GLI2,GPR37L1,IGF1,SMO,ZFP423
GO:BP	ventricular septum morphogenesis	GO:0060412	0.0486925	1.31254	40	1294	11	21354	BMP4,FZD1,FZD2,GJA5,HEY2,NOG,NOS3,SLIT2,SLIT3,TGFB2,ZFPM2
GO:BP	positive regulation of branching involved in ureteric bud morphogenesis	GO:0090190	0.0493875	1.30638	21	1294	8	21354	AGTR1A,BMP4,GDNF,GREM1,MAGED1,NOG,SMO,WNT2B
GO:BP	vocalization behavior	GO:0071625	0.0493875	1.30638	21	1294	8	21354	CELF6,CNTNAP2,DLG4,FOXP2,GLI3,SHANK3,SRPX2,TIFAB
GO:BP	cellular response to vitamin D	GO:0071305	0.0493875	1.30638	21	1294	8	21354	GDAP1,KANK2,MN1,PENK,PTN,SFRP1,SNAI2,TNC
GO:CC	extracellular matrix	GO:0031012	3.42376e-52	51.4655	487	1312	138	21259	ADAMTS1,ADAMTS18,ADAMTS4,ADAMTS7,ADAMTS8,ADAMTSL1,ADAMTSL3,ADAMTSL4,ANGPT1,ANGPTL1,ANGPTL2,ANXA1,ASPN,BGN,BMPER,CCBE1,CHADL,CLEC14A,COL12A1,COL14A1,COL16A1,COL18A1,COL1A1,COL1A2,COL23A1,COL28A1,COL3A1,COL4A5,COL5A1,COL5A2,COL5A3,COL6A1,COL6A2,COL6A3,COL6A4,COL8A1,COL8A2,COLEC12,CRISPLD2,CSPG4,CTGF,DCN,DPT,ECM1,ECM2,EFEMP1,EFEMP2,EFNA5,EGFLAM,EMILIN1,F13A1,F3,FBLN2,FBLN5,FBLN7,FBN1,FGF1,FGFR2,FIBC…
GO:CC	cell junction	GO:0030054	4.57108e-51	50.34	2079	1312	312	21259	ABLIM3,ADAM22,ADARB1,ADCY1,ADCYAP1,ADCYAP1R1,ADGRL1,ADGRL3,ADRA2C,AHI1,AKAP12,AKAP6,AMOTL1,ANK1,ANK2,ANXA1,APBA1,APBB1,APC2,ARHGAP44,ARHGEF9,ASIC2,ATP1A2,ATP1B2,ATP2B3,ATP2B4,BACE1,BRSK1,BVES,CACNA1B,CACNA1C,CACNA1G,CACNB1,CACNB2,CACNG4,CADM1,CADM3,CADM4,CADPS,CALB2,CALD1,CALY,CAP2,CAV1,CAV2,CAV3,CBLN2,CD99L2,CDH11,CDH13,CDH19,CDH2,CDH3,CDH5,CDH6,CDKL5,CELF6,CHRM2,CHRNA3,CHRNA5,CLMP,CLSTN2,CLSTN3…
GO:CC	synapse	GO:0045202	1.33052e-41	40.876	1469	1312	235	21259	ABLIM3,ADAM22,ADARB1,ADCY1,ADCYAP1,ADGRL1,ADGRL3,ADRA2C,AKAP12,ANK1,ANK2,ANXA1,APBA1,APBB1,APC2,ARHGAP44,ARHGEF9,ASIC2,ATP1A2,ATP1B2,ATP2B3,ATP2B4,BACE1,BRSK1,CACNA1B,CACNA1C,CACNA1G,CACNB1,CACNB2,CACNG4,CADM1,CADM3,CADPS,CALB2,CALD1,CALY,CAP2,CAV2,CAV3,CBLN2,CDH11,CDH13,CDH2,CDKL5,CELF6,CHRM2,CHRNA3,CHRNA5,CLSTN2,CLSTN3,CNKSR2,CNR1,CNTN1,CNTN5,CNTNAP2,COL4A5,CPEB1,CPLX1,CPT1C,CRYAB,CTNNA2,DACT1,…
GO:CC	collagen-containing extracellular matrix	GO:0062023	2.25657e-41	40.6466	359	1312	106	21259	ADAMTS1,ADAMTS4,ADAMTS8,ADAMTSL1,ADAMTSL4,ANGPT1,ANGPTL1,ANGPTL2,ANXA1,ASPN,BGN,BMPER,CHADL,CLEC14A,COL12A1,COL14A1,COL16A1,COL18A1,COL1A1,COL1A2,COL23A1,COL28A1,COL3A1,COL4A5,COL5A1,COL5A2,COL5A3,COL6A1,COL6A2,COL6A3,COL6A4,COL8A1,COL8A2,COLEC12,CSPG4,DCN,DPT,ECM1,ECM2,EFEMP1,EFEMP2,EFNA5,EGFLAM,EMILIN1,F13A1,F3,FBLN2,FBLN5,FBN1,FGFR2,FIBCD1,FN1,FREM2,GPC3,GPC6,HMCN2,IGF1,ITGB1,KAZALD1,LAMA1,LAM…
GO:CC	neuron projection	GO:0043005	1.12171e-36	35.9501	1570	1312	235	21259	ACVRL1,ADAM22,ADCYAP1,ADCYAP1R1,ADGRL1,ADGRL3,ADRA2C,AGTR1A,AMIGO1,ANK1,ANK2,AP3B2,APBA1,APBB1,APOD,ARHGAP44,ARHGEF15,ARMCX3,ASIC2,ATL1,ATP1A2,ATP2B4,BACE1,BAG2,BBS7,BOC,BRSK1,BRSK2,CACNA1B,CACNA1C,CACNA1G,CADM1,CALB2,CALD1,CALY,CAMK1G,CCDC141,CD200,CDH13,CDH2,CDKL5,CFH,CHL1,CHRM2,CHRNA3,CHRNA5,CLSTN2,CLSTN3,CNGA3,CNKSR2,CNR1,CNTN5,CNTNAP2,CPEB1,CPLX1,CPT1C,CRTAC1,CRYAB,CTNNA2,CX3CR1,CYGB,DBH,DLG…
GO:CC	cell periphery	GO:0071944	2.37733e-35	34.6239	6502	1312	616	21259	9330182L06RIK,ABCA8A,ABCC9,ABCG4,ACKR3,ACKR4,ACTG2,ACVRL1,ADAM22,ADCY1,ADCY5,ADCYAP1R1,ADGRA2,ADGRB2,ADGRE1,ADGRF5,ADGRG3,ADGRG6,ADGRL1,ADGRL3,ADGRL4,ADRA2B,ADRA2C,AFAP1L2,AGTR1A,AKAP12,AKAP6,AMIGO1,AMOTL1,ANGPT1,ANK1,ANK2,ANO2,ANTXR1,ANXA1,AOC3,APBA1,APBB1,APC2,APH1C,APLNR,ARHGAP44,ARHGEF9,ART3,ASIC2,ASIC4,ASTN1,ASTN2,ATP10A,ATP1A2,ATP1B2,ATP2B3,ATP2B4,AXL,BACE1,BBS1,BBS7,BC034090,BDKRB2,BGN,BOC…
GO:CC	plasma membrane bounded cell projection	GO:0120025	7.36527e-35	34.1328	2406	1312	306	21259	ABLIM3,ACTA2,ACTG2,ACVRL1,ADAM22,ADCY5,ADCYAP1,ADCYAP1R1,ADGRA2,ADGRL1,ADGRL3,ADRA2C,AGTR1A,AHI1,AMIGO1,AMOTL1,ANGPT1,ANK1,ANK2,ANO2,ANTXR1,ANXA1,AOC3,AP3B2,APBA1,APBB1,APC2,APOD,ARHGAP44,ARHGEF15,ARMCX3,ASIC2,ATL1,ATP1A2,ATP1B2,ATP2B4,BACE1,BAG2,BBS1,BBS7,BOC,BRSK1,BRSK2,BVES,CACNA1B,CACNA1C,CACNA1G,CADM1,CALB2,CALD1,CALY,CAMK1G,CAV1,CC2D2A,CCDC141,CCDC65,CD200,CDH13,CDH2,CDKL5,CFH,CHL1,CHRM2,CH…
GO:CC	cell projection	GO:0042995	1.60601e-34	33.7943	2498	1312	313	21259	ABLIM3,ACTA2,ACTG2,ACVRL1,ADAM22,ADCY5,ADCYAP1,ADCYAP1R1,ADGRA2,ADGRL1,ADGRL3,ADRA2C,AGTR1A,AHI1,AMIGO1,AMOTL1,ANGPT1,ANK1,ANK2,ANO2,ANTXR1,ANXA1,AOC3,AP3B2,APBA1,APBB1,APC2,APOD,ARHGAP44,ARHGEF15,ARMCX3,ASIC2,ASPN,ATL1,ATP1A2,ATP1B2,ATP2B4,BACE1,BAG2,BBS1,BBS7,BOC,BRSK1,BRSK2,BVES,CACNA1B,CACNA1C,CACNA1G,CADM1,CALB2,CALD1,CALY,CAMK1G,CAV1,CC2D2A,CCDC141,CCDC65,CD200,CDH13,CDH2,CDKL5,CFH,CHL1,CHR…
GO:CC	somatodendritic compartment	GO:0036477	2.09577e-34	33.6787	1079	1312	182	21259	ACVRL1,ADCYAP1,ADRA2C,AGTR1A,AKAP12,AMIGO1,APBA1,APBB1,APOD,ARHGAP44,ARHGEF15,ASIC2,ASTN1,ASTN2,ATP1A2,BACE1,BAG2,CACNA1B,CACNA1C,CACNA1G,CACNG4,CADM1,CALB2,CALD1,CD200,CDKL5,CFH,CHL1,CHRM2,CHRNA3,CHRNA5,CLSTN2,CLSTN3,CNGA3,CNKSR2,CNTNAP2,CPEB1,CPLX1,CPT1C,CRYAB,CX3CR1,CYGB,DBH,DLG2,DLG4,DMD,DNER,DPP6,DRP2,EEF1A2,ELAVL4,ENO2,EPHA7,ESR1,FBXO2,FEZ1,FGF13,FLNA,GABBR1,GAL,GAP43,GFRA1,GJC2,GLRB,GNAO1,…
GO:CC	plasma membrane	GO:0005886	3.51865e-34	33.4536	6365	1312	603	21259	9330182L06RIK,ABCA8A,ABCC9,ABCG4,ACKR3,ACKR4,ACVRL1,ADAM22,ADCY1,ADCY5,ADCYAP1R1,ADGRA2,ADGRB2,ADGRE1,ADGRF5,ADGRG3,ADGRG6,ADGRL1,ADGRL3,ADGRL4,ADRA2B,ADRA2C,AFAP1L2,AGTR1A,AKAP12,AKAP6,AMIGO1,AMOTL1,ANGPT1,ANK1,ANK2,ANO2,ANTXR1,ANXA1,AOC3,APBA1,APBB1,APC2,APH1C,APLNR,ARHGAP44,ARHGEF9,ART3,ASIC2,ASIC4,ASTN1,ATP10A,ATP1A2,ATP1B2,ATP2B3,ATP2B4,AXL,BACE1,BBS1,BBS7,BC034090,BDKRB2,BGN,BOC,BVES,C3AR1,…
GO:CC	plasma membrane protein complex	GO:0098797	7.66909e-32	31.1153	543	1312	118	21259	ABCC9,ACVRL1,AMIGO1,APC2,APH1C,ATP1A2,ATP1B2,C6,C7,CACNA1B,CACNA1C,CACNA1G,CACNA1H,CACNA2D3,CACNB1,CACNB2,CACNG4,CALCRL,CAV1,CAV2,CAV3,CDH11,CDH13,CDH19,CDH2,CDH3,CDH5,CDH6,CHRNA3,CHRNA5,CNTFR,CNTNAP2,CPT1C,DCHS1,DLG2,DLG4,DMD,DPP10,DPP6,DTNA,EMILIN1,EVC,EVC2,FXYD1,GABBR1,GFRA1,GJA1,GJA5,GJC1,GJC2,GJC3,GJD3,GLRB,GNAI1,GNAO1,GNB4,GNG7,GNG8,GRIA1,GRIA3,GRIA4,GRIK3,HSPA2,HTR3A,HTR3B,IGF1,IGF1R,ITGA1…
GO:CC	intrinsic component of plasma membrane	GO:0031226	2.95975e-31	30.5287	1565	1312	223	21259	ABCC9,ACVRL1,ADAM22,ADCY1,ADCY5,ADGRB2,ADGRE1,ADGRG3,ADGRG6,ADGRL1,ADGRL3,ADGRL4,ADRA2C,AMIGO1,ANK2,APH1C,ASIC2,ASIC4,ATP1A2,ATP1B2,ATP2B4,AXL,BACE1,BOC,C6,C7,CACNA1C,CACNA1G,CACNA1H,CACNG4,CADM1,CADM3,CALCRL,CALY,CAV1,CAV2,CAV3,CDH2,CHRM2,CHRNA3,CHRNA5,CLSTN2,CLSTN3,CNR1,CNTFR,CNTN1,CNTN5,CNTNAP2,CPT1C,DCBLD2,DDR2,DLG2,DLG4,DPP10,DPP6,EDA,EFNA5,EMILIN1,EPHA7,F2R,FAM26E,FCRLS,FGFR1,FGFR2,FLRT2,FL…
GO:CC	cell body	GO:0044297	3.02245e-31	30.5196	803	1312	147	21259	ACTA2,ACTG2,ACVRL1,ADCYAP1,ADRA2C,AKAP12,AMIGO1,APBB1,APOD,ASIC2,ASTN1,ASTN2,ATP1A2,ATP1B2,BACE1,CACNA1B,CACNA1C,CACNA1G,CACNG4,CALD1,CD200,CFH,CHRM2,CHRNA3,CHRNA5,CNGA3,CNKSR2,CNTNAP2,CPEB1,CPLX1,CRYAB,CX3CR1,CYGB,DBH,DLG2,DMD,DNER,DPP6,DRP2,EEF1A2,ELAVL4,ENO2,EPHA7,ESR1,FEZ1,FLNA,GABBR1,GAL,GAP43,GFAP,GFRA1,GJC2,GNAO1,GNB4,GRIA1,GRIA3,GRIA4,GRIK3,HPCA,HSPB1,HTR3A,HTR3B,IGF1,ITGA8,KCNA2,KCNAB1,K…
GO:CC	integral component of plasma membrane	GO:0005887	5.23419e-31	30.2812	1485	1312	215	21259	ABCC9,ACVRL1,ADAM22,ADCY1,ADCY5,ADGRB2,ADGRE1,ADGRG3,ADGRG6,ADGRL1,ADGRL3,ADGRL4,ADRA2C,AMIGO1,ANK2,APH1C,ASIC2,ASIC4,ATP1A2,ATP1B2,ATP2B4,AXL,BACE1,BOC,C6,C7,CACNA1C,CACNA1G,CACNA1H,CACNG4,CADM1,CADM3,CALCRL,CALY,CAV1,CAV2,CAV3,CDH2,CHRM2,CHRNA3,CHRNA5,CLSTN2,CLSTN3,CNR1,CNTFR,CNTNAP2,CPT1C,DCBLD2,DDR2,DLG2,DLG4,DPP10,DPP6,EDA,EMILIN1,EPHA7,F2R,FAM26E,FCRLS,FGFR1,FGFR2,FLRT2,FLT1,FLT4,FXYD1,FXYD…
GO:CC	extracellular region	GO:0005576	2.88902e-28	27.5392	2804	1312	322	21259	ADAMDEC1,ADAMTS1,ADAMTS18,ADAMTS4,ADAMTS7,ADAMTS8,ADAMTSL1,ADAMTSL3,ADAMTSL4,ADCYAP1,AEBP1,ANGPT1,ANGPTL1,ANGPTL2,ANXA1,AOAH,AOC3,APC2,APLN,APOD,APOL10B,APOL7C,APOLD1,ARSI,ARTN,ASPN,AXL,BGN,BMP4,BMP5,BMPER,C1QTNF2,C1QTNF3,C1QTNF7,C1QTNF9,C1RA,C1RL,C6,C7,CAR11,CBLN2,CCBE1,CCDC3,CD109,CD163,CDH13,CERS1,CFH,CHADL,CHL1,CHRD,CHRDL1,CKM,CLEC14A,CLEC3B,CMTM5,CNTFR,COL12A1,COL14A1,COL16A1,COL18A1,COL1A1,…
GO:CC	neuronal cell body	GO:0043025	9.54213e-28	27.0204	713	1312	131	21259	ACVRL1,ADCYAP1,ADRA2C,AKAP12,AMIGO1,APBB1,APOD,ASIC2,ASTN1,ASTN2,ATP1A2,BACE1,CACNA1B,CACNA1C,CACNA1G,CALD1,CD200,CFH,CHRM2,CHRNA3,CHRNA5,CNGA3,CNKSR2,CNTNAP2,CPEB1,CPLX1,CRYAB,CX3CR1,CYGB,DBH,DLG2,DMD,DNER,DPP6,DRP2,EEF1A2,ELAVL4,ENO2,EPHA7,ESR1,FEZ1,FLNA,GABBR1,GAL,GAP43,GFRA1,GJC2,GRIA1,GRIA3,GRIA4,GRIK3,HPCA,HSPB1,HTR3A,HTR3B,IGF1,ITGA8,KCNA2,KCNAB1,KCNB1,KCNC2,KCNC4,KCND2,KCND3,KCNIP4,KCNJ12…
GO:CC	axon	GO:0030424	1.87012e-27	26.7281	773	1312	137	21259	ADAM22,ADCYAP1,ADGRL1,ADGRL3,ADRA2C,AMIGO1,ANK1,AP3B2,APBB1,ARMCX3,ATL1,BACE1,BAG2,BOC,BRSK1,BRSK2,CACNA1B,CADM1,CALB2,CALY,CCDC141,CD200,CDKL5,CFH,CHRM2,CNGA3,CNR1,CNTN5,CNTNAP2,CPEB1,CPLX1,CPT1C,CRTAC1,CRYAB,CTNNA2,DBH,DLG2,DLG4,DMD,DTNA,ELAVL4,ENO2,ESR1,FEZ1,FGF13,FLNA,GABBR1,GABRB3,GAP43,GFRA1,GJC2,GRIA1,GRIA3,GRIA4,GRIK3,HPCA,HSPB1,HTR3A,HTR3B,IL1R1,KCNA2,KCNA6,KCNAB1,KCNB1,KCNC2,KCNC4,KCNK2…
GO:CC	sarcolemma	GO:0042383	3.67859e-27	26.4343	172	1312	60	21259	ABCC9,ADCY5,AKAP6,ANK1,ANK2,ANXA1,ATP1A2,ATP2B4,BGN,BVES,CACNA1C,CACNB1,CACNB2,CACNG4,CASQ1,CAV1,CAV2,CAV3,CDH2,COL6A1,COL6A2,COL6A3,DES,DMD,DTNA,DYSF,EDNRA,ESR1,FLNC,FXYD1,ITGB1,KCNB1,KCND2,KCND3,KCNJ12,KCNJ5,KCNJ8,LAMA2,NOS1,NOS3,PGM5,POPDC2,RTN2,RYR2,SCN1B,SCN5A,SGCA,SGCB,SGCD,SGCE,SLC27A6,SLC2A4,SLC8A1,SLC8A2,SNTB1,SNTG2,STAC,STBD1,SYNM,TGFB3
GO:CC	postsynapse	GO:0098794	1.90726e-26	25.7196	725	1312	130	21259	ADAM22,ADCY1,ADGRL1,ADRA2C,ANK1,ANK2,APBA1,APBB1,APC2,ARHGAP44,ARHGEF9,ASIC2,ATP1A2,CACNA1C,CACNG4,CADM1,CALD1,CALY,CAP2,CDH2,CDKL5,CHRM2,CHRNA3,CHRNA5,CLSTN2,CLSTN3,CNKSR2,CNTN1,CPEB1,CPLX1,CPT1C,CRYAB,CTNNA2,DGKB,DLG2,DLG4,DMD,DMTN,DNAJC6,DRP2,EIF4EBP1,EPHA7,F2R,FAIM2,FBXO2,FLNA,FXYD6,GABBR1,GABRB3,GAP43,GLRB,GRIA1,GRIA3,GRIA4,GRIK3,HIP1,HPCA,HSPB1,HTR3A,HTR3B,IL1R1,INA,ITGA8,ITGB1,KCNB1,KCNC2,…
GO:CC	plasma membrane region	GO:0098590	2.72125e-26	25.5652	1318	1312	189	21259	ACKR3,ADAM22,ADCY1,ADCYAP1R1,ADGRL1,ADRA2C,AGTR1A,AKAP6,AMOTL1,ANK1,ANK2,ANTXR1,ANXA1,APBA1,APBB1,APC2,ATP1A2,ATP1B2,ATP2B4,BBS1,BBS7,BC034090,BVES,C5AR1,CACNA1C,CACNG4,CADM1,CADM3,CALB2,CAR11,CAV1,CAV2,CAV3,CD300LG,CDH13,CDH2,CDKL5,CHRM2,CHRNA3,CHRNA5,CLSTN2,CLSTN3,CNKSR2,CNR1,CNTFR,CNTN1,CNTN5,CNTNAP2,CRYAB,CSPG4,CTNNA2,DAB2,DDR2,DGKB,DLC1,DLG2,DLG4,DMD,DMTN,EFNA5,EHD2,ENO2,EPHA7,EVC,EVC2,F2R,F…
GO:CC	membrane	GO:0016020	3.28157e-22	21.4839	10228	1312	810	21259	6330403K07RIK,9330182L06RIK,A4GALT,A930004D18RIK,ABCA8A,ABCA9,ABCC9,ABCG4,ACKR1,ACKR3,ACKR4,ACVRL1,ADAM11,ADAM22,ADARB1,ADCY1,ADCY5,ADCYAP1R1,ADGRA2,ADGRB2,ADGRE1,ADGRF5,ADGRG3,ADGRG6,ADGRL1,ADGRL3,ADGRL4,ADRA2B,ADRA2C,AFAP1L2,AGTR1A,AKAP12,AKAP6,AMIGO1,AMOTL1,ANGPT1,ANK1,ANK2,ANO2,ANTXR1,ANXA1,AOC3,AP3B2,APBA1,APBB1,APC2,APH1C,APLNR,APOLD1,ARHGAP44,ARHGEF9,ARMCX1,ARMCX3,ARMCX4,ART3,ASIC2,ASIC4,A…
GO:CC	synaptic membrane	GO:0097060	1.17954e-21	20.9283	443	1312	90	21259	ADAM22,ADCY1,ADGRL1,ADRA2C,ANK1,ANK2,ANXA1,APBA1,APBB1,ATP2B4,CACNA1C,CACNG4,CADM1,CADM3,CALB2,CDH2,CHRM2,CHRNA3,CHRNA5,CLSTN2,CLSTN3,CNKSR2,CNR1,CNTN1,CNTN5,CNTNAP2,CRYAB,CTNNA2,DGKB,DLG2,DLG4,DMD,ENO2,EPHA7,F2R,FAIM2,FXYD6,GABBR1,GABRB3,GLRB,GRIA1,GRIA3,GRIA4,GRIK3,HIP1,HSPB1,HTR3A,HTR3B,ITGA8,ITGB1,KCNA2,KCNB1,KCNC2,KCNC4,KCND2,KCND3,LIN7B,LRFN1,LRRC4B,LRRC4C,LRRTM1,MAGEE1,MPP2,MUSK,NLGN2,NRP1…
GO:CC	dendritic tree	GO:0097447	1.35934e-21	20.8667	774	1312	126	21259	ACVRL1,AGTR1A,AMIGO1,APBA1,APBB1,APOD,ARHGAP44,ARHGEF15,ASIC2,ATP1A2,BACE1,BAG2,CACNA1B,CACNA1C,CACNA1G,CADM1,CALB2,CALD1,CDKL5,CHL1,CHRM2,CHRNA3,CHRNA5,CLSTN2,CLSTN3,CNGA3,CNTNAP2,CPLX1,CPT1C,CRYAB,CX3CR1,DBH,DLG2,DLG4,DNER,DRP2,ELAVL4,EPHA7,FBXO2,FEZ1,FGF13,FLNA,GABBR1,GAP43,GLRB,GNAO1,GRIA1,GRIA3,GRIA4,GRIK3,HPCA,HSPB1,ITGA8,ITGB1,JPH4,KCNA2,KCNAB1,KCNB1,KCNC2,KCNC4,KCND2,KCND3,KCNIP4,KCNJ12,K…
GO:CC	cation channel complex	GO:0034703	1.5232e-21	20.8172	220	1312	61	21259	ABCC9,AKAP6,AMIGO1,CACNA1B,CACNA1C,CACNA1G,CACNA1H,CACNA2D3,CACNB1,CACNB2,CACNG4,CNTNAP2,CPT1C,DLG2,DLG4,DPP10,DPP6,FKBP1B,GRIA1,GRIA3,GRIA4,GRIK3,HSPA2,HTR3A,HTR3B,KCNA2,KCNA5,KCNA6,KCNAB1,KCNB1,KCNC2,KCNC4,KCND2,KCND3,KCNE4,KCNF1,KCNG1,KCNH2,KCNIP2,KCNIP4,KCNJ5,KCNJ8,KCNK2,KCNQ2,KCNQ3,KCNQ4,LRRC55,MICU3,OLFM1,OLFM2,PKD2,RYR2,SCN11A,SCN1B,SCN5A,SCN7A,SHISA6,SNAP25,TRDN,TRPC4,TRPC6
GO:CC	dendrite	GO:0030425	1.07356e-20	19.9692	772	1312	124	21259	ACVRL1,AGTR1A,AMIGO1,APBA1,APBB1,APOD,ARHGAP44,ARHGEF15,ASIC2,ATP1A2,BACE1,BAG2,CACNA1B,CACNA1C,CACNA1G,CADM1,CALB2,CALD1,CDKL5,CHL1,CHRM2,CHRNA3,CHRNA5,CLSTN2,CLSTN3,CNGA3,CNTNAP2,CPLX1,CPT1C,CRYAB,DBH,DLG2,DLG4,DNER,DRP2,ELAVL4,EPHA7,FBXO2,FEZ1,FGF13,FLNA,GABBR1,GAP43,GLRB,GNAO1,GRIA1,GRIA3,GRIA4,GRIK3,HPCA,HSPB1,ITGA8,ITGB1,JPH4,KCNA2,KCNAB1,KCNB1,KCNC2,KCNC4,KCND2,KCND3,KCNIP4,KCNJ12,KCNQ3,KI…
GO:CC	transmembrane transporter complex	GO:1902495	3.01788e-20	19.5203	314	1312	72	21259	ABCC9,AKAP6,AMIGO1,ANO2,ATP1A2,ATP1B2,CACNA1B,CACNA1C,CACNA1G,CACNA1H,CACNA2D3,CACNB1,CACNB2,CACNG4,CHRNA3,CHRNA5,CNGA3,CNTNAP2,CPT1C,DLG2,DLG4,DPP10,DPP6,FKBP1B,FXYD1,GABRB3,GLRB,GRIA1,GRIA3,GRIA4,GRIK3,HSPA2,HTR3A,HTR3B,KCNA2,KCNA5,KCNA6,KCNAB1,KCNB1,KCNC2,KCNC4,KCND2,KCND3,KCNE4,KCNF1,KCNG1,KCNH2,KCNIP2,KCNIP4,KCNJ5,KCNJ8,KCNK2,KCNQ2,KCNQ3,KCNQ4,LRRC55,MICU3,OLFM1,OLFM2,PKD2,PLN,RYR2,SCN11A,SC…
GO:CC	glutamatergic synapse	GO:0098978	9.06083e-20	19.0428	444	1312	87	21259	ABLIM3,ADAM22,ADCY1,ADGRL3,ADRA2C,APBA1,APBB1,ARHGAP44,ATP2B3,ATP2B4,CACNG4,CADM1,CADPS,CALY,CBLN2,CDH11,CDKL5,CHRM2,CLSTN2,CLSTN3,CNKSR2,CNR1,CPLX1,CPT1C,DGKB,DLG2,DLG4,DRP2,EIF4EBP1,ELAVL4,EPHA7,FLNA,FXYD6,GABBR1,GPC6,GRIA1,GRIA4,GRIK3,HIP1,HPCA,HTR3A,INA,ITGB1,KCND2,LRRC4B,LRRC4C,LRRTM1,MAPK10,MPP2,MYH10,NAPB,NCS1,NOS1,NPTX1,NPTX2,NPTXR,NRP1,NRP2,NSG1,OLFM1,OLFM2,P2RX6,PCDH17,PLCB1,PLCB4,PPP1R…
GO:CC	transporter complex	GO:1990351	2.57731e-19	18.5888	325	1312	72	21259	ABCC9,AKAP6,AMIGO1,ANO2,ATP1A2,ATP1B2,CACNA1B,CACNA1C,CACNA1G,CACNA1H,CACNA2D3,CACNB1,CACNB2,CACNG4,CHRNA3,CHRNA5,CNGA3,CNTNAP2,CPT1C,DLG2,DLG4,DPP10,DPP6,FKBP1B,FXYD1,GABRB3,GLRB,GRIA1,GRIA3,GRIA4,GRIK3,HSPA2,HTR3A,HTR3B,KCNA2,KCNA5,KCNA6,KCNAB1,KCNB1,KCNC2,KCNC4,KCND2,KCND3,KCNE4,KCNF1,KCNG1,KCNH2,KCNIP2,KCNIP4,KCNJ5,KCNJ8,KCNK2,KCNQ2,KCNQ3,KCNQ4,LRRC55,MICU3,OLFM1,OLFM2,PKD2,PLN,RYR2,SCN11A,SC…
GO:CC	ion channel complex	GO:0034702	1.65474e-18	17.7813	295	1312	67	21259	ABCC9,AKAP6,AMIGO1,ANO2,CACNA1B,CACNA1C,CACNA1G,CACNA1H,CACNA2D3,CACNB1,CACNB2,CACNG4,CHRNA3,CHRNA5,CNTNAP2,CPT1C,DLG2,DLG4,DPP10,DPP6,FKBP1B,GABRB3,GLRB,GRIA1,GRIA3,GRIA4,GRIK3,HSPA2,HTR3A,HTR3B,KCNA2,KCNA5,KCNA6,KCNAB1,KCNB1,KCNC2,KCNC4,KCND2,KCND3,KCNE4,KCNF1,KCNG1,KCNH2,KCNIP2,KCNIP4,KCNJ5,KCNJ8,KCNK2,KCNQ2,KCNQ3,KCNQ4,LRRC55,MICU3,OLFM1,OLFM2,PKD2,RYR2,SCN11A,SCN1B,SCN5A,SCN7A,SHANK3,SHISA6,…
GO:CC	postsynaptic membrane	GO:0045211	7.73112e-18	17.1118	311	1312	68	21259	ADAM22,ADCY1,ADRA2C,ANK1,ANK2,APBB1,CACNA1C,CACNG4,CADM1,CDH2,CHRM2,CHRNA3,CHRNA5,CLSTN2,CLSTN3,CNKSR2,CNTN1,CTNNA2,DGKB,DLG2,DLG4,DMD,EPHA7,F2R,FAIM2,FXYD6,GABBR1,GABRB3,GLRB,GRIA1,GRIA3,GRIA4,GRIK3,HIP1,HSPB1,HTR3A,HTR3B,ITGB1,KCNB1,KCNC2,KCNC4,KCND2,KCND3,LIN7B,LRFN1,LRRC4B,LRRC4C,LRRTM1,MAGEE1,MPP2,MUSK,NLGN2,NRP1,NRP2,NSG1,OPRK1,P2RX6,PCDH17,PDLIM4,PTPRS,RGS7BP,RPH3A,SHANK3,SHC4,SHISA6,SLC8A…
GO:CC	anchoring junction	GO:0070161	5.56601e-16	15.2545	660	1312	103	21259	ADCYAP1R1,ADGRL3,AHI1,AKAP6,AMOTL1,ANK2,ATP1A2,BVES,CADM1,CADM3,CADM4,CALB2,CAV1,CAV2,CAV3,CD99L2,CDH11,CDH19,CDH2,CDH3,CDH5,CDH6,CLMP,CNTNAP2,CTNNA2,CTNNA3,DCHS1,DES,DLC1,DLG4,DMD,DSC3,EFNA5,EFS,ENAH,FAM107A,FERMT2,FGF13,FLNA,FLRT2,FNDC1,FRMD4A,FRMD6,FXYD1,GJA1,GJA5,GJC1,GJC2,GJC3,GJD3,GRIA1,ITGA11,ITGB1,JAM2,JAM3,KCNA2,KCNA5,KIRREL,LAMA1,LIMS2,LIN7B,MPDZ,MXRA8,MYLK,NEXN,NPHP1,NRP1,PARVA,PARVB,P…
GO:CC	presynapse	GO:0098793	5.85388e-16	15.2326	611	1312	98	21259	ADCYAP1,ADGRL1,ADRA2C,APBA1,APBB1,ARHGAP44,ATP2B4,BACE1,BRSK1,CACNA1B,CACNA1C,CACNB1,CACNB2,CADM1,CADM3,CADPS,CALB2,CDH2,CHRM2,CNR1,CNTN1,CNTN5,CPLX1,CTNNA2,DBH,DLG2,DLG4,DMD,DNAJC6,DOC2B,EGFLAM,ESR1,FXYD6,GABBR1,GABRB3,GRIA1,GRIA3,GRIA4,GRIK3,HIP1,HTR3A,KCNA2,KCNA6,KCNC2,KCNC4,KCNJ10,KCNK2,KIF1A,LIN7B,LRRC4B,NAPB,NCS1,NEFL,NGF,NLGN2,NOS1,NPY1R,NTSR1,OPRK1,PCDH17,PENK,PTN,PTPRN,PTPRS,RAB12,RAB3B,…
GO:CC	basement membrane	GO:0005604	6.12952e-15	14.2126	109	1312	36	21259	ADAMTS1,COL18A1,COL28A1,COL4A5,COL5A1,COL8A1,COL8A2,EFEMP1,EFNA5,EGFLAM,FBN1,FN1,FREM2,HMCN2,ITGB1,LAMA1,LAMA2,LAMA4,LAMB1,LAMB2,LAMC3,LOXL1,LOXL2,MMRN2,NID1,NPNT,NTN1,P3H1,P3H2,PTN,SPARC,TGFB2,THBS2,TIMP3,TNC,VTN
GO:CC	collagen trimer	GO:0005581	1.00366e-14	13.9984	87	1312	32	21259	C1QTNF2,C1QTNF3,C1QTNF7,C1QTNF9,CCBE1,COL12A1,COL14A1,COL16A1,COL18A1,COL1A1,COL1A2,COL23A1,COL28A1,COL3A1,COL4A5,COL5A1,COL5A2,COL5A3,COL6A1,COL6A2,COL6A3,COL6A4,COL8A1,COL8A2,COL9A2,COLEC10,COLEC12,DCN,EDA,EMILIN1,LUM,SCARA3
GO:CC	potassium channel complex	GO:0034705	1.48504e-14	13.8283	88	1312	32	21259	ABCC9,AMIGO1,CNTNAP2,DLG2,DLG4,DPP10,DPP6,GRIA4,GRIK3,KCNA2,KCNA5,KCNA6,KCNAB1,KCNB1,KCNC2,KCNC4,KCND2,KCND3,KCNE4,KCNF1,KCNG1,KCNH2,KCNIP2,KCNIP4,KCNJ5,KCNJ8,KCNK2,KCNQ2,KCNQ3,KCNQ4,LRRC55,SNAP25
GO:CC	cell surface	GO:0009986	4.838e-14	13.3153	1071	1312	137	21259	ACKR3,ACKR4,ACVRL1,ADAMTS7,ADCYAP1R1,ADGRA2,ADGRE1,ADGRF5,ADGRG6,ADRA2B,ANTXR1,ANXA1,AOC3,ASTN1,ATP1B2,AXL,BACE1,BGN,C5AR1,CACNA1C,CACNG4,CAV1,CAV2,CAV3,CD163,CD200,CD248,CD93,CD99L2,CDH13,CDH2,CDH5,CFH,CLEC14A,CLSTN2,CLSTN3,CNTFR,CNTNAP2,COL23A1,CRYAB,CSPG4,CX3CR1,CXCL12,DCBLD2,DMD,DPP6,EFNA5,ENG,ENO2,EPOR,F2R,F3,FERMT2,FGFR2,FZD1,GFRA1,GFRA4,GJD3,GLRB,GPC3,GPC6,GPR37,GPRC5B,GREM1,GRIA1,HHIP,HSP…
GO:CC	neuron to neuron synapse	GO:0098984	5.37484e-14	13.2696	419	1312	74	21259	ADAM22,ADCY1,ADGRL1,ADRA2C,ANK2,ARHGAP44,ARHGEF9,ATP1B2,BACE1,CACNA1C,CACNG4,CADM1,CALD1,CAP2,CDH2,CDKL5,CHRM2,CHRNA3,CLSTN2,CLSTN3,CNKSR2,CPEB1,CRYAB,CTNNA2,DLG2,DLG4,DMD,DMTN,DNAJC6,DRP2,EPHA7,GAP43,GRIA1,GRIA3,GRIA4,HSPB1,IL1R1,ITGA8,KCND2,KCND3,LIN7B,LRFN1,LRRC4B,LRRC4C,MAP1B,MAPK8IP2,MAPT,MPDZ,MPP2,NCS1,NOS1,NTSR1,P2RX6,PENK,PLCB4,PPP1R9A,PRKAR1B,PSD,PSD3,PTPRS,RGS7BP,SHANK3,SHISA6,SLC8A2,SL…
GO:CC	T-tubule	GO:0030315	7.33873e-14	13.1344	70	1312	28	21259	ABCC9,AKAP6,ANK2,ATP1A2,ATP2B4,CACNA1C,CACNB1,CACNB2,CACNG4,CASQ1,CAV3,CDH2,DYSF,EDNRA,ESR1,FXYD1,KCND2,KCNJ12,KCNJ5,NOS1,RTN2,SCN1B,SCN5A,SLC2A4,SLC8A1,STAC,STBD1,TGFB3
GO:CC	cell-cell junction	GO:0005911	8.18211e-14	13.0871	517	1312	84	21259	ADCYAP1R1,ADGRL3,AHI1,AKAP6,AMOTL1,ANK2,ATP1A2,BVES,CADM1,CADM3,CADM4,CALB2,CAV3,CD99L2,CDH11,CDH19,CDH2,CDH3,CDH5,CDH6,CLMP,CNTNAP2,CTNNA2,CTNNA3,DCHS1,DES,DLG4,DSC3,EFNA5,FERMT2,FGF13,FLNA,FLRT2,FNDC1,FRMD4A,FRMD6,FXYD1,GJA1,GJA5,GJC1,GJC2,GJC3,GJD3,GRIA1,ITGB1,JAM2,JAM3,KCNA2,KCNA5,KIRREL,LAMA1,LIMS2,LIN7B,MPDZ,MXRA8,MYLK,NEXN,NPHP1,PCDH12,PCDH9,PCDHGC3,PDLIM3,PDLIM4,PDLIM7,PGM5,PKD2,PODXL,PRK…
GO:CC	extracellular space	GO:0005615	1.90413e-13	12.7203	1941	1312	208	21259	ADAMTS4,ADCYAP1,AEBP1,ANGPT1,ANGPTL1,ANGPTL2,ANXA1,AOC3,APLN,APOD,ARTN,ASPN,AXL,BGN,BMP4,BMP5,BMPER,C1QTNF2,C1QTNF3,C1QTNF7,C1QTNF9,C1RA,C1RL,C6,CBLN2,CCBE1,CD109,CDH13,CERS1,CFH,CHADL,CHRD,CKM,CLEC3B,CMTM5,CNTFR,COL12A1,COL14A1,COL16A1,COL18A1,COL1A1,COL1A2,COL23A1,COL28A1,COL3A1,COL4A5,COL5A1,COL5A2,COL5A3,COL6A1,COL6A2,COL6A3,COL8A1,COL8A2,COLEC10,CREG2,CRISPLD1,CRISPLD2,CRTAP,CTGF,CXCL12,CXCL…
GO:CC	receptor complex	GO:0043235	1.99622e-13	12.6998	392	1312	70	21259	ACVRL1,ADCYAP1R1,AXL,CACNG4,CALCRL,CHRNA3,CHRNA5,CNTFR,CPT1C,DDR2,DLG2,DLG4,EMILIN1,ENG,EPHA7,FGFR1,FLT1,FLT4,GABBR1,GABRB3,GDNF,GFRA1,GFRA4,GPBAR1,GPR20,GPR37,GPR37L1,GPRC5B,GRIA1,GRIA3,GRIA4,GRIK3,HTR3A,HTR3B,IGF1R,ITGA11,ITGA7,ITGA8,ITGA9,ITGB1,KCTD12B,LEPR,LIFR,LOXL4,MUSK,NOTCH3,NPNT,NPR1,OLFM1,OLFM2,P2RX6,PDGFRA,PDGFRB,PLA2R1,PLP1,PLXNA4,PLXNB3,PTH1R,PTPRB,RAMP2,ROR1,ROR2,SHANK3,SHISA6,SLITR…
GO:CC	membrane microdomain	GO:0098857	2.61898e-13	12.5819	394	1312	70	21259	ADCY1,ADCY5,ADCYAP1R1,AKAP6,ANGPT1,ANK2,ATP1A2,ATP2B3,BACE1,BVES,CACNA1C,CAV1,CAV2,CAV3,CDH13,CDH2,CHRNA3,CLIP3,CNR1,CNTN1,DLC1,DMD,DYSF,EDNRA,EDNRB,EFNA5,EHD2,ENO2,F2R,FAIM2,FAM198A,FXYD1,GABBR1,GJA1,GNAI1,GPRC5B,HAS2,IRS1,ITGB1,KCNA5,KCND2,KCND3,KCNQ3,KDR,KIRREL,LDHB,MAPT,MYOF,NOS1,NOS3,NTSR1,PLPP3,PLVAP,PODXL,PRKAR2B,PTGIS,PTGS2,RGMB,RIT2,RTN4RL2,SCN5A,SERPINH1,SGCA,SLC25A4,SLC2A4,SLC5A7,SMO,S…
GO:CC	distal axon	GO:0150034	2.67162e-13	12.5732	385	1312	69	21259	ADCYAP1,ADGRL1,ADRA2C,APBB1,BOC,BRSK1,BRSK2,CACNA1B,CALB2,CDKL5,CHRM2,CNR1,CPEB1,CPLX1,CRTAC1,DBH,ELAVL4,ENO2,ESR1,FEZ1,FGF13,FLNA,GABRB3,GAP43,GRIA3,GRIA4,GRIK3,KCNA2,KCNA6,KCNC2,KCNC4,KCNK2,KIF5A,KIF5C,LRRTM1,MAP1B,MAPK8IP1,MAPT,MYH10,MYO9A,NCS1,NEFL,NOS1,NRP1,NRSN1,NTSR1,OLFM1,OPRK1,PCDH9,PENK,PPP1R9A,PTBP2,PTPRN,PTPRS,ROR1,SLC18A2,SLC2A13,SLC8A2,SMO,SNAP25,SNCA,SNCB,STMN2,STMN3,STMN4,SYP,TIMP…
GO:CC	membrane raft	GO:0045121	7.85793e-13	12.1047	393	1312	69	21259	ADCY1,ADCY5,ADCYAP1R1,AKAP6,ANGPT1,ANK2,ATP1A2,ATP2B3,BACE1,BVES,CACNA1C,CAV1,CAV2,CAV3,CDH13,CDH2,CHRNA3,CLIP3,CNR1,CNTN1,DLC1,DMD,EDNRA,EDNRB,EFNA5,EHD2,ENO2,F2R,FAIM2,FAM198A,FXYD1,GABBR1,GJA1,GNAI1,GPRC5B,HAS2,IRS1,ITGB1,KCNA5,KCND2,KCND3,KCNQ3,KDR,KIRREL,LDHB,MAPT,MYOF,NOS1,NOS3,NTSR1,PLPP3,PLVAP,PODXL,PRKAR2B,PTGIS,PTGS2,RGMB,RIT2,RTN4RL2,SCN5A,SERPINH1,SGCA,SLC25A4,SLC2A4,SLC5A7,SMO,SNAP25…
GO:CC	contractile fiber	GO:0043292	8.63507e-13	12.0637	245	1312	52	21259	ABCC9,ABLIM2,ACTA2,ANK1,ANK2,ATP2B4,CACNA1C,CALD1,CASQ1,CASQ2,CAV3,CFL2,CRYAB,CSRP1,DES,DMD,FBXL22,FERMT2,FHOD3,FKBP1B,FLNA,FLNC,GJA1,HSPB1,JPH2,KCNA5,KCNJ8,LMOD1,MMP2,MYL1,MYL9,MYOM1,NEXN,NOS1,NPNT,PARVA,PARVB,PDLIM3,PDLIM4,PDLIM7,PGM5,PPP1R12B,RYR2,SCN5A,SLC8A1,SORBS2,SYNM,SYNPO2,TMOD1,TNNT2,TPM1,TPM2
GO:CC	voltage-gated potassium channel complex	GO:0008076	9.11772e-13	12.0401	76	1312	28	21259	AMIGO1,CNTNAP2,DLG2,DLG4,DPP10,DPP6,KCNA2,KCNA5,KCNA6,KCNAB1,KCNB1,KCNC2,KCNC4,KCND2,KCND3,KCNE4,KCNF1,KCNG1,KCNH2,KCNIP2,KCNIP4,KCNJ5,KCNK2,KCNQ2,KCNQ3,KCNQ4,LRRC55,SNAP25
GO:CC	membrane protein complex	GO:0098796	1.88569e-12	11.7245	1155	1312	140	21259	ABCC9,ACVRL1,AKAP6,AMIGO1,ANO2,AP3B2,APC2,APH1C,ATP1A2,ATP1B2,C6,C7,CACNA1B,CACNA1C,CACNA1G,CACNA1H,CACNA2D3,CACNB1,CACNB2,CACNG4,CALCRL,CAV1,CAV2,CAV3,CDH11,CDH13,CDH19,CDH2,CDH3,CDH5,CDH6,CHRNA3,CHRNA5,CNGA3,CNTFR,CNTNAP2,COPZ2,CPLX1,CPT1C,DCHS1,DLG2,DLG4,DMD,DOC2B,DPP10,DPP6,DTNA,EMILIN1,EPN2,EVC,EVC2,FKBP1B,FXYD1,GABBR1,GABRB3,GFRA1,GJA1,GJA5,GJC1,GJC2,GJC3,GJD3,GLRB,GNAI1,GNAO1,GNB4,GNG7,GNG…
GO:CC	asymmetric synapse	GO:0032279	6.81436e-12	11.1666	391	1312	67	21259	ADAM22,ADCY1,ADGRL1,ADRA2C,ANK2,ARHGAP44,ARHGEF9,CACNA1C,CACNG4,CADM1,CALD1,CAP2,CDH2,CDKL5,CHRM2,CHRNA3,CLSTN2,CLSTN3,CNKSR2,CPEB1,CRYAB,CTNNA2,DLG2,DLG4,DMD,DMTN,DNAJC6,DRP2,EPHA7,GAP43,GRIA1,GRIA3,GRIA4,HSPB1,IL1R1,ITGA8,KCND2,KCND3,LIN7B,LRFN1,LRRC4B,LRRC4C,MAP1B,MAPK8IP2,MAPT,MPDZ,MPP2,NCS1,NOS1,P2RX6,PLCB4,PPP1R9A,PSD,PSD3,PTPRS,RGS7BP,SHANK3,SHISA6,SLC8A2,SLITRK3,SMO,SORBS2,SYN1,SYN2,SYNDI…
GO:CC	myofibril	GO:0030016	9.54016e-12	11.0204	234	1312	49	21259	ABCC9,ABLIM2,ANK1,ANK2,ATP2B4,CACNA1C,CALD1,CASQ1,CASQ2,CAV3,CFL2,CRYAB,CSRP1,DES,DMD,FBXL22,FERMT2,FHOD3,FKBP1B,FLNA,FLNC,HSPB1,JPH2,KCNA5,KCNJ8,LMOD1,MMP2,MYL1,MYL9,MYOM1,NEXN,NOS1,PARVA,PARVB,PDLIM3,PDLIM4,PDLIM7,PGM5,PPP1R12B,RYR2,SCN5A,SLC8A1,SORBS2,SYNM,SYNPO2,TMOD1,TNNT2,TPM1,TPM2
GO:CC	postsynaptic density	GO:0014069	1.0472e-11	10.98	385	1312	66	21259	ADAM22,ADCY1,ADGRL1,ADRA2C,ANK2,ARHGAP44,ARHGEF9,CACNA1C,CACNG4,CADM1,CALD1,CAP2,CDH2,CDKL5,CHRNA3,CLSTN2,CLSTN3,CNKSR2,CPEB1,CRYAB,CTNNA2,DLG2,DLG4,DMD,DMTN,DNAJC6,DRP2,EPHA7,GAP43,GRIA1,GRIA3,GRIA4,HSPB1,IL1R1,ITGA8,KCND2,KCND3,LIN7B,LRFN1,LRRC4B,LRRC4C,MAP1B,MAPK8IP2,MAPT,MPDZ,MPP2,NCS1,NOS1,P2RX6,PLCB4,PPP1R9A,PSD,PSD3,PTPRS,RGS7BP,SHANK3,SHISA6,SLC8A2,SLITRK3,SMO,SORBS2,SYN1,SYN2,SYNDIG1,SYP…
GO:CC	neuromuscular junction	GO:0031594	1.2055e-11	10.9188	89	1312	29	21259	APBB1,CAV3,COL4A5,DES,DLG2,DLG4,EPHA7,F2R,GRIA1,ITGB1,KCNC4,KCNN3,LAMA2,LAMA4,LAMB2,MUSK,MYH10,NEFL,PDZRN3,PLS3,POSTN,PPP1R9A,PTN,SERPINE2,SLC5A7,SV2A,SYNGR1,SYNGR3,SYP
GO:CC	postsynaptic specialization	GO:0099572	1.6335e-11	10.7869	417	1312	69	21259	ADAM22,ADCY1,ADGRL1,ADRA2C,ANK2,ARHGAP44,ARHGEF9,CACNA1C,CACNG4,CADM1,CALD1,CAP2,CDH2,CDKL5,CHRNA3,CLSTN2,CLSTN3,CNKSR2,CPEB1,CRYAB,CTNNA2,DLG2,DLG4,DMD,DMTN,DNAJC6,DRP2,EPHA7,GABRB3,GAP43,GRIA1,GRIA3,GRIA4,HSPB1,IL1R1,ITGA8,KCND2,KCND3,LIN7B,LRFN1,LRRC4B,LRRC4C,LRRTM1,MAP1B,MAPK8IP2,MAPT,MPDZ,MPP2,NCS1,NLGN2,NOS1,P2RX6,PLCB4,PPP1R9A,PSD,PSD3,PTPRS,RGS7BP,SHANK3,SHISA6,SLC8A2,SLITRK3,SMO,SORBS2,S…
GO:CC	intrinsic component of membrane	GO:0031224	1.64956e-11	10.7826	7070	1312	562	21259	6330403K07RIK,9330182L06RIK,A4GALT,A930004D18RIK,ABCA8A,ABCA9,ABCC9,ABCG4,ACKR1,ACKR3,ACKR4,ACVRL1,ADAM11,ADAM22,ADARB1,ADCY1,ADCY5,ADCYAP1R1,ADGRA2,ADGRB2,ADGRE1,ADGRF5,ADGRG3,ADGRG6,ADGRL1,ADGRL3,ADGRL4,ADRA2B,ADRA2C,AGTR1A,AKAP6,AMIGO1,ANK2,ANO2,ANTXR1,AOC3,APH1C,APLNR,APOLD1,ARMCX1,ARMCX3,ARMCX4,ART3,ASIC2,ASIC4,ASPHD2,ASTN1,ASTN2,ATL1,ATP10A,ATP1A2,ATP1B2,ATP2B3,ATP2B4,AXL,B3GALNT1,B3GALT1,B…
GO:CC	intrinsic component of synaptic membrane	GO:0099240	1.78403e-11	10.7486	213	1312	46	21259	ADAM22,ADCY1,ADRA2C,ATP2B4,CACNG4,CADM1,CADM3,CDH2,CHRM2,CHRNA3,CLSTN2,CLSTN3,CNR1,CNTN1,CNTN5,DLG4,EPHA7,FXYD6,GABBR1,GABRB3,GRIA1,HTR3A,ITGB1,KCNA2,KCNC4,KCND2,KCND3,LRFN1,LRRC4B,LRRC4C,LRRTM1,MPP2,NLGN2,NRP1,NRP2,OPRK1,P2RX6,PCDH17,PTPRS,RGS7BP,SCN11A,SHISA6,SLC8A1,SLITRK3,SNAP25,SYT6
GO:CC	Z disc	GO:0030018	3.02396e-11	10.5194	139	1312	36	21259	ANK1,ANK2,ATP2B4,CACNA1C,CASQ1,CASQ2,CAV3,CFL2,CRYAB,CSRP1,DES,DMD,FBXL22,FHOD3,FKBP1B,FLNA,FLNC,HSPB1,JPH2,KCNA5,MYL9,NEXN,NOS1,PARVA,PARVB,PDLIM3,PDLIM4,PDLIM7,PGM5,PPP1R12B,RYR2,SCN5A,SLC8A1,SORBS2,SYNM,SYNPO2
GO:CC	perikaryon	GO:0043204	3.15299e-11	10.5013	200	1312	44	21259	ADCYAP1,AMIGO1,ASTN1,ASTN2,CACNA1C,CNGA3,CPLX1,CRYAB,DLG2,DRP2,ELAVL4,ENO2,ESR1,FLNA,GAP43,GJC2,GRIA3,GRIK3,HPCA,HSPB1,ITGA8,KCNA2,KCNAB1,KCNB1,KCNC2,KCND2,KIF5A,MAP1B,MAPK10,NELL2,NGB,NTSR1,OLFM1,OPRK1,PAM,PCSK2,PENK,PTPRS,RESP18,RGS7BP,RTN4RL2,SCN1B,SLC5A7,TMEM100
GO:CC	intrinsic component of postsynaptic membrane	GO:0098936	4.146e-11	10.3824	155	1312	38	21259	ADAM22,ADCY1,ADRA2C,CACNG4,CADM1,CDH2,CHRM2,CHRNA3,CLSTN2,CLSTN3,CNTN1,DLG4,EPHA7,FXYD6,GABBR1,GABRB3,GRIA1,HTR3A,ITGB1,KCNC4,KCND2,KCND3,LRFN1,LRRC4B,LRRC4C,LRRTM1,MPP2,NLGN2,NRP1,NRP2,OPRK1,P2RX6,PCDH17,PTPRS,RGS7BP,SHISA6,SLC8A1,SLITRK3
GO:CC	sarcomere	GO:0030017	6.44185e-11	10.191	212	1312	45	21259	ABCC9,ANK1,ANK2,ATP2B4,CACNA1C,CASQ1,CASQ2,CAV3,CFL2,CRYAB,CSRP1,DES,DMD,FBXL22,FERMT2,FHOD3,FKBP1B,FLNA,FLNC,HSPB1,JPH2,KCNA5,LMOD1,MMP2,MYL9,MYOM1,NEXN,NOS1,PARVA,PARVB,PDLIM3,PDLIM4,PDLIM7,PGM5,PPP1R12B,RYR2,SCN5A,SLC8A1,SORBS2,SYNM,SYNPO2,TMOD1,TNNT2,TPM1,TPM2
GO:CC	I band	GO:0031674	1.36625e-10	9.86447	153	1312	37	21259	ANK1,ANK2,ATP2B4,CACNA1C,CASQ1,CASQ2,CAV3,CFL2,CRYAB,CSRP1,DES,DMD,FBXL22,FERMT2,FHOD3,FKBP1B,FLNA,FLNC,HSPB1,JPH2,KCNA5,MYL9,NEXN,NOS1,PARVA,PARVB,PDLIM3,PDLIM4,PDLIM7,PGM5,PPP1R12B,RYR2,SCN5A,SLC8A1,SORBS2,SYNM,SYNPO2
GO:CC	actin cytoskeleton	GO:0015629	4.0724e-09	8.39015	488	1312	71	21259	ABLIM2,ABLIM3,ACTA2,ACTG2,ANXA1,APC2,ARHGAP6,AXL,CALB2,CALD1,CAP2,CDC42EP3,CDH2,CFL2,CNR1,CRYAB,CSRP1,CTNNA2,DAPK1,DDR2,DENND2A,DLC1,DMTN,ENAH,FAM107A,FERMT2,FHOD3,FILIP1,FLNA,FLNC,FLT1,FMN2,GAS2L2,HSPB7,JAM3,LIMCH1,LMOD1,LURAP1,MTSS1L,MYH10,MYH11,MYL1,MYL9,MYLK,MYO9A,NEXN,NOTCH3,PARVA,PARVB,PDLIM3,PDLIM4,PDLIM7,PGM5,PKD2,PKNOX2,PLEKHH2,PLS3,PPP1R9A,ROR1,SHROOM4,SMTN,SNAP25,SNCA,STK38L,SYNPO2,TEK…
GO:CC	integral component of membrane	GO:0016021	4.24803e-09	8.37181	6904	1312	538	21259	6330403K07RIK,9330182L06RIK,A4GALT,A930004D18RIK,ABCA8A,ABCA9,ABCC9,ABCG4,ACKR1,ACKR3,ACKR4,ACVRL1,ADAM11,ADAM22,ADARB1,ADCY1,ADCY5,ADCYAP1R1,ADGRA2,ADGRB2,ADGRE1,ADGRF5,ADGRG3,ADGRG6,ADGRL1,ADGRL3,ADGRL4,ADRA2B,ADRA2C,AGTR1A,AKAP6,AMIGO1,ANK2,ANO2,ANTXR1,AOC3,APH1C,APLNR,APOLD1,ARMCX1,ARMCX3,ARMCX4,ASIC2,ASIC4,ASPHD2,ASTN1,ASTN2,ATL1,ATP10A,ATP1A2,ATP1B2,ATP2B3,ATP2B4,AXL,B3GALNT1,B3GALT1,B3GNT9…
GO:CC	integral component of synaptic membrane	GO:0099699	4.34614e-09	8.3619	195	1312	40	21259	ADAM22,ADCY1,ADRA2C,ATP2B4,CACNG4,CADM1,CADM3,CDH2,CHRM2,CHRNA3,CLSTN2,CLSTN3,CNR1,EPHA7,FXYD6,GABBR1,GABRB3,GRIA1,HTR3A,ITGB1,KCNA2,KCNC4,KCND2,KCND3,LRFN1,LRRC4B,LRRC4C,LRRTM1,NLGN2,NRP1,NRP2,OPRK1,P2RX6,PCDH17,PTPRS,SCN11A,SHISA6,SLC8A1,SLITRK3,SYT6
GO:CC	integral component of postsynaptic membrane	GO:0099055	4.60731e-09	8.33655	147	1312	34	21259	ADAM22,ADCY1,ADRA2C,CACNG4,CADM1,CDH2,CHRM2,CHRNA3,CLSTN2,CLSTN3,EPHA7,FXYD6,GABBR1,GABRB3,GRIA1,HTR3A,ITGB1,KCNC4,KCND2,KCND3,LRFN1,LRRC4B,LRRC4C,LRRTM1,NLGN2,NRP1,NRP2,OPRK1,P2RX6,PCDH17,PTPRS,SHISA6,SLC8A1,SLITRK3
GO:CC	caveola	GO:0005901	1.00569e-08	7.99754	99	1312	27	21259	ADCYAP1R1,AKAP6,ATP1A2,BVES,CACNA1C,CAV1,CAV2,CAV3,CDH13,DLC1,EFNA5,EHD2,F2R,FAM198A,FXYD1,IRS1,KCND2,KCND3,MYOF,NOS1,NOS3,PLVAP,PTGIS,PTGS2,SCN5A,SMO,TRPC4
GO:CC	cellular anatomical entity	GO:0110165	1.06552e-08	7.97244	19788	1312	1274	21259	6330403K07RIK,9330182L06RIK,A4GALT,A930004D18RIK,AASS,ABCA8A,ABCA9,ABCC9,ABCG4,ABLIM2,ABLIM3,ACKR1,ACKR3,ACKR4,ACTA2,ACTG2,ACVRL1,ADAM11,ADAM22,ADAMDEC1,ADAMTS1,ADAMTS18,ADAMTS4,ADAMTS7,ADAMTS8,ADAMTSL1,ADAMTSL3,ADAMTSL4,ADARB1,ADCY1,ADCY5,ADCYAP1,ADCYAP1R1,ADGRA2,ADGRB2,ADGRE1,ADGRF5,ADGRG3,ADGRG6,ADGRL1,ADGRL3,ADGRL4,ADRA2B,ADRA2C,AEBP1,AFAP1L2,AGTR1A,AHI1,AHRR,AK4,AKAP12,AKAP6,ALDH1A3,ALDH7A1,…
GO:CC	plasma membrane raft	GO:0044853	1.27692e-08	7.89384	129	1312	31	21259	ADCYAP1R1,AKAP6,ATP1A2,BVES,CACNA1C,CAV1,CAV2,CAV3,CDH13,CDH2,CHRNA3,DLC1,EFNA5,EHD2,F2R,FAM198A,FXYD1,HAS2,IRS1,KCND2,KCND3,MYOF,NOS1,NOS3,PLVAP,PTGIS,PTGS2,SCN5A,SLC5A7,SMO,TRPC4
GO:CC	transport vesicle	GO:0030133	2.52718e-08	7.59736	384	1312	59	21259	APBA1,BACE1,BGN,BRSK1,CADM1,CAV2,CRISPLD2,DBH,DLG2,DLG4,DMD,GABBR1,GRIA1,IGF1,KCNC4,KIF1A,NGF,NKD2,NPTX1,NPY1R,NRSN1,NRSN2,OPRK1,PAM,PCSK2,PENK,PTPRN,PTPRS,RAB11FIP5,RAB12,RAB3B,RAB3C,RAB3IL1,RASSF9,RPH3A,SCG3,SLC10A4,SLC18A2,SLC2A4,SLC5A7,SLC6A17,SNAP25,SNCA,SSPN,SV2A,SV2B,SYN1,SYN2,SYNDIG1,SYNGR1,SYNGR3,SYP,SYT1,SYT13,SYT15,SYT17,SYT4,SYT6,SYT9
GO:CC	cell leading edge	GO:0031252	4.27873e-08	7.36869	440	1312	64	21259	ABLIM3,ACTA2,ACTG2,AMOTL1,ANK1,ANTXR1,APBB1,APC2,ARHGAP44,CADM4,CDH2,CDKL5,CNTNAP2,CSPG4,CTNNA2,CTNNA3,DLC1,DMD,DYSF,ENAH,FAM107A,FERMT2,FGD1,GABBR1,GRIA1,HPCA,ITGA8,ITGB1,JMY,KANK1,KCNA2,KCNB1,KCNC2,KCNC4,LAYN,LDB2,MAPT,MPP2,MTSS1L,MYH10,MYLK,PARVA,PARVB,PDGFRB,PDLIM4,PDLIM7,PHLDB2,PKD2,PLEKHH2,PODXL,PPP1R9A,PSD,PSD3,PTPRM,S100B,SGCE,SHISA6,SNAP25,SORBS2,STMN2,TACR3,TUBB3,WASF3,WLS
GO:CC	supramolecular polymer	GO:0099081	4.48078e-08	7.34865	1015	1312	115	21259	ABCC9,ABLIM2,ACTA2,ACTG2,ANK1,ANK2,ANXA1,APC2,ATP2B4,BAG2,CACNA1C,CALD1,CASQ1,CASQ2,CAV3,CFL2,CLIP3,CLIP4,CLMP,COL16A1,COL1A1,COL1A2,COL3A1,COL4A5,COL5A1,COL5A2,COL5A3,CRYAB,CSRP1,DCN,DES,DMD,DMTN,DNAL1,DYSF,EML1,FBLN5,FBN1,FBXL22,FERMT2,FEZ1,FGF13,FHOD3,FKBP1B,FLNA,FLNC,FMN2,GAS2L2,GFAP,GJA1,HSPB1,INA,JAM3,JPH2,KCNA5,KCNJ8,KIF1A,KIF26B,KIF5A,KIF5C,KRT17,LMOD1,LTBP1,LUM,MAP1B,MAPT,MFAP2,MFAP4,MMP…
GO:CC	postsynaptic specialization membrane	GO:0099634	5.37758e-08	7.26941	136	1312	31	21259	ADAM22,ADCY1,ADRA2C,CACNA1C,CACNG4,CDH2,CHRNA3,CLSTN2,CLSTN3,CNKSR2,DLG2,DLG4,EPHA7,GABRB3,GRIA1,HSPB1,KCND2,KCND3,LIN7B,LRFN1,LRRC4B,LRRC4C,LRRTM1,MPP2,NLGN2,P2RX6,PTPRS,RGS7BP,SHISA6,SLITRK3,SYNDIG1
GO:CC	supramolecular fiber	GO:0099512	6.04981e-08	7.21826	1008	1312	114	21259	ABCC9,ABLIM2,ACTA2,ACTG2,ANK1,ANK2,ANXA1,APC2,ATP2B4,BAG2,CACNA1C,CALD1,CASQ1,CASQ2,CAV3,CFL2,CLIP3,CLIP4,CLMP,COL16A1,COL1A1,COL1A2,COL3A1,COL5A1,COL5A2,COL5A3,CRYAB,CSRP1,DCN,DES,DMD,DMTN,DNAL1,DYSF,EML1,FBLN5,FBN1,FBXL22,FERMT2,FEZ1,FGF13,FHOD3,FKBP1B,FLNA,FLNC,FMN2,GAS2L2,GFAP,GJA1,HSPB1,INA,JAM3,JPH2,KCNA5,KCNJ8,KIF1A,KIF26B,KIF5A,KIF5C,KRT17,LMOD1,LTBP1,LUM,MAP1B,MAPT,MFAP2,MFAP4,MMP2,MYH10…
GO:CC	neuron spine	GO:0044309	1.15595e-07	6.93706	225	1312	41	21259	APBA1,APBB1,ARHGAP44,ASIC2,ATP1A2,CALD1,CNTNAP2,CRYAB,DLG4,FBXO2,GABBR1,GRIA1,GRIA3,GRIA4,HPCA,ITGA8,ITGB1,KCND2,KCND3,LAMA2,MAP1B,MPP2,MYH10,NOS1,NTSR1,P2RX6,PDLIM4,PPP1R9A,PRKAR2B,PSD,RGS7BP,RPH3A,SEZ6,SHANK3,SHISA6,SLC8A1,SLC8A2,SYNDIG1,SYP,TANC2,ZFP804A
GO:CC	intrinsic component of postsynaptic specialization membrane	GO:0098948	1.23689e-07	6.90767	95	1312	25	21259	ADAM22,ADCY1,ADRA2C,CACNG4,CDH2,CHRNA3,CLSTN2,CLSTN3,DLG4,EPHA7,GABRB3,GRIA1,KCND2,KCND3,LRFN1,LRRC4B,LRRC4C,LRRTM1,MPP2,NLGN2,P2RX6,PTPRS,RGS7BP,SHISA6,SLITRK3
GO:CC	growth cone	GO:0030426	1.75983e-07	6.75453	219	1312	40	21259	ADGRL1,APBB1,BOC,CDKL5,CNR1,CPEB1,CRTAC1,ELAVL4,ENO2,FEZ1,FGF13,FLNA,GAP43,KIF5A,KIF5C,LRRTM1,MAP1B,MAPK8IP1,MAPT,MYH10,MYO9A,NEFL,NRP1,NRSN1,OLFM1,PCDH9,PPP1R9A,PTBP2,PTPRS,SLC2A13,SMO,SNAP25,SNCA,SNCB,STMN2,STMN3,STMN4,TIMP2,TUBB3,ZFP804A
GO:CC	exocytic vesicle	GO:0070382	2.38692e-07	6.62216	258	1312	44	21259	APBA1,BACE1,BRSK1,CADM1,DLG2,DLG4,DMD,GABBR1,GRIA1,IGF1,KCNC4,KIF1A,NGF,NKD2,NPY1R,OPRK1,PENK,PTPRS,RAB12,RAB3B,RAB3C,RAB3IL1,RPH3A,SLC10A4,SLC18A2,SLC5A7,SLC6A17,SNAP25,SNCA,SV2A,SV2B,SYN1,SYN2,SYNDIG1,SYNGR1,SYNGR3,SYP,SYT1,SYT13,SYT15,SYT17,SYT4,SYT6,SYT9
GO:CC	site of polarized growth	GO:0030427	4.60733e-07	6.33655	226	1312	40	21259	ADGRL1,APBB1,BOC,CDKL5,CNR1,CPEB1,CRTAC1,ELAVL4,ENO2,FEZ1,FGF13,FLNA,GAP43,KIF5A,KIF5C,LRRTM1,MAP1B,MAPK8IP1,MAPT,MYH10,MYO9A,NEFL,NRP1,NRSN1,OLFM1,PCDH9,PPP1R9A,PTBP2,PTPRS,SLC2A13,SMO,SNAP25,SNCA,SNCB,STMN2,STMN3,STMN4,TIMP2,TUBB3,ZFP804A
GO:CC	sarcoplasm	GO:0016528	5.60046e-07	6.25178	80	1312	22	21259	AKAP6,ANK1,CACNB1,CASQ1,CASQ2,DMPK,FABP3,FKBP1B,FLNC,JPH2,JPH3,JPH4,MRVI1,NOL3,NOS1,P3H2,PLN,RTN2,RYR2,SGCD,SLC2A4,TRDN
GO:CC	secretory vesicle	GO:0099503	6.12555e-07	6.21285	612	1312	77	21259	ABCC9,APBA1,BACE1,BRSK1,CADM1,CADPS,CAV1,CAV2,COL1A1,DBH,DLG2,DLG4,DMD,FSTL3,GABBR1,GAL,GRIA1,ICA1L,IGF1,IGFBP3,ITGB1,KCNC4,KIF1A,LOXL1,MOXD1,NCS1,NGF,NKD2,NOS1,NPY1R,OPRK1,PAM,PCSK1N,PCSK2,PENK,PLA1A,PRKG1,PTPRN,PTPRS,RAB11FIP5,RAB12,RAB3B,RAB3C,RAB3IL1,RESP18,RPH3A,SCG2,SCG3,SELP,SERPINE2,SLC10A4,SLC18A2,SLC2A4,SLC5A7,SLC6A17,SNAP25,SNCA,SPARC,SV2A,SV2B,SYN1,SYN2,SYNDIG1,SYNGR1,SYNGR3,SYP,SYT1,…
GO:CC	dendritic spine	GO:0043197	7.03372e-07	6.15282	220	1312	39	21259	APBA1,APBB1,ARHGAP44,ASIC2,ATP1A2,CALD1,CRYAB,DLG4,FBXO2,GABBR1,GRIA1,GRIA3,GRIA4,HPCA,ITGA8,ITGB1,KCND2,KCND3,LAMA2,MAP1B,MPP2,MYH10,NOS1,NTSR1,P2RX6,PDLIM4,PPP1R9A,PRKAR2B,PSD,RGS7BP,RPH3A,SEZ6,SHANK3,SHISA6,SLC8A1,SLC8A2,SYNDIG1,TANC2,ZFP804A
GO:CC	dystrophin-associated glycoprotein complex	GO:0016010	7.2151e-07	6.14176	19	1312	11	21259	CAV3,DMD,DTNA,PGM5,SGCA,SGCB,SGCD,SGCE,SNTB1,SNTG2,SSPN
GO:CC	glycoprotein complex	GO:0090665	7.2151e-07	6.14176	19	1312	11	21259	CAV3,DMD,DTNA,PGM5,SGCA,SGCB,SGCD,SGCE,SNTB1,SNTG2,SSPN
GO:CC	neuron projection terminus	GO:0044306	1.44061e-06	5.84145	198	1312	36	21259	ADCYAP1,ADRA2C,CACNA1B,CALB2,CHRM2,CPLX1,DBH,DLG4,DMD,ESR1,FSTL3,GABRB3,GRIA3,GRIA4,GRIK3,KCNA2,KCNA6,KCNC2,KCNC4,KCNK2,NCS1,NGF,NOS1,NTSR1,OPRK1,PENK,PTPRN,ROR1,SLC18A2,SLC8A2,SNCA,SNCB,SYP,SYT1,SYT4,UCHL1
GO:CC	cell-cell contact zone	GO:0044291	4.14328e-06	5.38266	81	1312	21	21259	AKAP6,ANK2,ATP1A2,CADM4,CAV3,CDH2,CTNNA3,DES,FGF13,FXYD1,GJA1,GJA5,ITGB1,JAM2,JAM3,KCNA5,PCDH9,PGM5,SCN1B,SCN5A,SLC8A1
GO:CC	actin filament bundle	GO:0032432	6.07756e-06	5.21627	90	1312	22	21259	ABLIM3,ACTA2,CRYAB,ENAH,FAM107A,FERMT2,FLNA,GAS2L2,LIMCH1,MYH10,MYL9,MYLK,PDLIM3,PDLIM4,PDLIM7,PGM5,PLS3,ROR1,SHROOM4,SYNPO2,TEK,TRIP6
GO:CC	integral component of postsynaptic specialization membrane	GO:0099060	6.07756e-06	5.21627	90	1312	22	21259	ADAM22,ADCY1,ADRA2C,CACNG4,CDH2,CHRNA3,CLSTN2,CLSTN3,EPHA7,GABRB3,GRIA1,KCND2,KCND3,LRFN1,LRRC4B,LRRC4C,LRRTM1,NLGN2,P2RX6,PTPRS,SHISA6,SLITRK3
GO:CC	postsynaptic density membrane	GO:0098839	8.1821e-06	5.08713	99	1312	23	21259	ADAM22,ADCY1,ADRA2C,CACNA1C,CACNG4,CLSTN2,CLSTN3,CNKSR2,DLG2,DLG4,EPHA7,GRIA1,HSPB1,LIN7B,LRFN1,LRRC4B,LRRC4C,MPP2,PTPRS,RGS7BP,SHISA6,SLITRK3,SYNDIG1
GO:CC	extrinsic component of plasma membrane	GO:0019897	8.87051e-06	5.05205	184	1312	33	21259	ANXA1,APC2,CAV2,CDH11,CDH13,CDH19,CDH2,CDH3,CDH5,CDH6,CNKSR2,CTNNA2,DCHS1,DLG4,DTNA,FERMT2,GNAI1,GNAO1,GNB4,GNG7,GNG8,HIP1,KCNAB1,OLFM1,OLFM2,PLEKHA4,RYR2,SCUBE1,SCUBE2,SERPINE2,SHANK3,SNAP25,STAC
GO:CC	extrinsic component of membrane	GO:0019898	8.96329e-06	5.04753	320	1312	47	21259	ANXA1,APC2,CADPS,CAV2,CDH11,CDH13,CDH19,CDH2,CDH3,CDH5,CDH6,CNKSR2,CTNNA2,DCHS1,DLG4,DTNA,EHD2,FERMT2,GFRA1,GNAI1,GNAO1,GNB4,GNG7,GNG8,HIP1,HPCA,KCNAB1,KIF1A,MGLL,OLFM1,OLFM2,OSR1,PLEKHA4,PSD,RGS6,RPH3A,RYR2,SCUBE1,SCUBE2,SERPINE2,SHANK3,SNAP25,SOX10,STAC,SYN1,SYN2,SYT15
GO:CC	banded collagen fibril	GO:0098643	9.16102e-06	5.03806	11	1312	8	21259	COL16A1,COL1A1,COL1A2,COL3A1,COL5A1,COL5A2,COL5A3,LUM
GO:CC	fibrillar collagen trimer	GO:0005583	9.16102e-06	5.03806	11	1312	8	21259	COL16A1,COL1A1,COL1A2,COL3A1,COL5A1,COL5A2,COL5A3,LUM
GO:CC	endomembrane system	GO:0012505	1.21028e-05	4.91712	4008	1312	324	21259	A4GALT,ABCC9,ACKR1,ACKR3,ACKR4,ADCY5,ADCYAP1R1,AGTR1A,AKAP6,ANK1,ANK2,ANXA1,AOC3,AP3B2,APBA1,APBB1,APC2,APH1C,APOD,ARHGAP44,ARSI,ASTN1,ASTN2,ATL1,ATP10A,ATP1A2,B3GALNT1,B3GALT1,B3GNT9,B4GALT2,BACE1,BDKRB2,BGN,BRSK1,BRSK2,CACNB1,CADM1,CADPS,CALCRL,CALY,CAMK1G,CASP12,CASQ1,CASQ2,CAV1,CAV2,CAV3,CCDC3,CD300LG,CDC42EP3,CDH5,CDS2,CERCAM,CERS1,CLIP3,CLSTN2,CLSTN3,CLVS1,CNTNAP2,COL1A1,COL1A2,COLEC10,COLG…
GO:CC	intercalated disc	GO:0014704	1.38207e-05	4.85947	58	1312	17	21259	AKAP6,ANK2,ATP1A2,CAV3,CDH2,CTNNA3,DES,FGF13,FXYD1,GJA1,GJA5,ITGB1,KCNA5,PGM5,SCN1B,SCN5A,SLC8A1
GO:CC	lamellipodium	GO:0030027	2.44522e-05	4.61168	201	1312	34	21259	ABLIM3,ACTA2,ACTG2,AMOTL1,ANTXR1,APBB1,APC2,CDH2,CSPG4,CTNNA2,CTNNA3,DMD,DYSF,ENAH,FERMT2,FGD1,ITGB1,KCNA2,MTSS1L,MYH10,MYLK,PARVA,PARVB,PDLIM4,PKD2,PLEKHH2,PODXL,PPP1R9A,PTPRM,SNAP25,SORBS2,STMN2,TUBB3,WASF3
GO:CC	vesicle membrane	GO:0012506	3.69297e-05	4.43262	499	1312	62	21259	ANXA1,AP3B2,BACE1,CADPS,CALY,CAV1,CAV2,COPZ2,DBH,DLG2,DMD,DYSF,EPN2,FMN2,GABRB3,GRIA1,HIP1,KIF1A,MOXD1,MYOF,NMNAT2,NOS1,NOS3,NSG1,NSG2,OPRK1,PAM,PKD2,PLA1A,PTPRN,PTPRS,RAB11FIP5,RAB3B,RAB3C,RAB7B,RASSF9,RPH3A,RYR2,SCG3,SELP,SGIP1,SLC10A4,SLC18A2,SLC2A4,SLC6A17,SMO,SNCA,SPARC,SV2A,SV2B,SYN1,SYN2,SYNDIG1,SYNGR1,SYNGR3,SYP,SYT1,SYT13,SYT4,SYT6,SYT9,WLS
GO:CC	cytoplasmic vesicle membrane	GO:0030659	3.83448e-05	4.41629	477	1312	60	21259	ANXA1,AP3B2,BACE1,CADPS,CALY,CAV1,CAV2,COPZ2,DBH,DLG2,DMD,DYSF,EPN2,FMN2,GABRB3,GRIA1,HIP1,KIF1A,MOXD1,MYOF,NMNAT2,NSG1,NSG2,OPRK1,PAM,PKD2,PLA1A,PTPRN,PTPRS,RAB11FIP5,RAB3B,RAB3C,RAB7B,RASSF9,RPH3A,RYR2,SCG3,SELP,SGIP1,SLC10A4,SLC18A2,SLC2A4,SLC6A17,SMO,SNCA,SPARC,SV2A,SV2B,SYN1,SYN2,SYNDIG1,SYNGR1,SYNGR3,SYP,SYT1,SYT13,SYT4,SYT6,SYT9,WLS
GO:CC	presynaptic membrane	GO:0042734	4.05112e-05	4.39243	177	1312	31	21259	ADGRL1,APBA1,APBB1,ATP2B4,CACNA1C,CADM1,CADM3,CDH2,CHRM2,CNR1,CNTN1,CNTN5,CTNNA2,FXYD6,GABBR1,GRIK3,HIP1,HTR3A,KCNA2,KCNC2,LRRC4B,NLGN2,OPRK1,PCDH17,PTPRS,RGS7BP,RIMS3,SCN11A,SNAP25,SYP,SYT1
GO:CC	sarcoplasmic reticulum	GO:0016529	5.13273e-05	4.28965	70	1312	18	21259	AKAP6,ANK1,CACNB1,CASQ1,CASQ2,DMPK,FKBP1B,JPH2,MRVI1,NOL3,NOS1,P3H2,PLN,RTN2,RYR2,SGCD,SLC2A4,TRDN
GO:CC	synaptic vesicle	GO:0008021	6.21581e-05	4.2065	238	1312	37	21259	APBA1,BACE1,BRSK1,CADM1,DLG2,DLG4,DMD,GABBR1,GRIA1,KCNC4,KIF1A,NGF,NPY1R,OPRK1,PENK,PTPRS,RAB12,RAB3B,RAB3C,RPH3A,SLC10A4,SLC18A2,SLC5A7,SLC6A17,SNAP25,SNCA,SV2A,SV2B,SYN1,SYN2,SYNDIG1,SYNGR1,SYNGR3,SYP,SYT1,SYT6,SYT9
GO:CC	intrinsic component of postsynaptic density membrane	GO:0099146	6.77955e-05	4.1688	64	1312	17	21259	ADAM22,ADCY1,ADRA2C,CACNG4,CLSTN2,CLSTN3,DLG4,EPHA7,GRIA1,LRFN1,LRRC4B,LRRC4C,MPP2,PTPRS,RGS7BP,SHISA6,SLITRK3
GO:CC	excitatory synapse	GO:0060076	8.65636e-05	4.06266	65	1312	17	21259	CADM3,CALB2,CNTNAP2,CTNNA2,DLG4,GRIA1,GRIA3,LRRTM1,NLGN2,P2RX6,PLCB4,SHANK3,SHISA6,SRPX2,SYNDIG1,SYP,SYT1
GO:CC	contractile actin filament bundle	GO:0097517	0.00011214	3.95024	81	1312	19	21259	ABLIM3,ACTA2,ENAH,FAM107A,FERMT2,GAS2L2,LIMCH1,MYH10,MYL9,MYLK,PDLIM3,PDLIM4,PDLIM7,PGM5,ROR1,SHROOM4,SYNPO2,TEK,TRIP6
GO:CC	stress fiber	GO:0001725	0.00011214	3.95024	81	1312	19	21259	ABLIM3,ACTA2,ENAH,FAM107A,FERMT2,GAS2L2,LIMCH1,MYH10,MYL9,MYLK,PDLIM3,PDLIM4,PDLIM7,PGM5,ROR1,SHROOM4,SYNPO2,TEK,TRIP6
GO:CC	complex of collagen trimers	GO:0098644	0.000117713	3.92917	18	1312	9	21259	COL16A1,COL1A1,COL1A2,COL3A1,COL4A5,COL5A1,COL5A2,COL5A3,LUM
GO:CC	dendritic shaft	GO:0043198	0.000138909	3.85727	67	1312	17	21259	CACNA1B,CACNA1C,FLNA,GABBR1,GRIA1,GRIA3,JPH4,KIRREL,MPP2,NLGN2,NTSR1,PRKAR2B,RGS7BP,SEZ6,SLC8A1,SYNDIG1,ZFP804A
GO:CC	actomyosin	GO:0042641	0.000141903	3.84801	90	1312	20	21259	ABLIM3,ACTA2,ENAH,FAM107A,FERMT2,GAS2L2,LIMCH1,LURAP1,MYH10,MYL9,MYLK,PDLIM3,PDLIM4,PDLIM7,PGM5,ROR1,SHROOM4,SYNPO2,TEK,TRIP6
GO:CC	GABA-ergic synapse	GO:0098982	0.000141903	3.84801	90	1312	20	21259	ARHGEF9,ATP2B3,CDH13,CLSTN3,CNR1,CNTN5,EFNA5,GABBR1,GABRB3,GAP43,GLRB,KCND2,KCND3,LRRTM1,NLGN2,PCDH17,PLCB1,SLC6A17,SLITRK3,SV2A
GO:CC	main axon	GO:0044304	0.000157575	3.80251	75	1312	18	21259	ANK1,APBB1,CNGA3,CNTNAP2,DBH,DLG2,DLG4,GABBR1,GJC2,KCNA2,KCNAB1,KCNC2,KCNQ3,MAP1B,MAPT,MGLL,SCN1B,TUBB4A
GO:CC	cell projection membrane	GO:0031253	0.000161407	3.79208	352	1312	47	21259	ANK1,ANTXR1,APC2,ATP1B2,BBS1,BBS7,BVES,CDKL5,CNTNAP2,CSPG4,DLC1,DMD,DMTN,EVC,EVC2,FAM107A,FERMT2,GABBR1,GAP43,GPR161,GPR37L1,GRIA1,HPCA,ITGA8,ITGB1,KANK1,KCNA2,KCNB1,KCNC2,KCNC4,KIRREL,MAPT,MPP2,MTSS1L,MXRA8,NDRG4,PKD2,PODXL,PSD,PSD3,PTH1R,SGCE,SHANK3,SHISA6,SMO,TACR3,WLS
GO:CC	anchored component of membrane	GO:0031225	0.00023046	3.6374	191	1312	31	21259	ART3,CD109,CDH13,CNTFR,CNTN1,CNTN5,DLG4,EFNA5,ENPP6,GAS1,GFRA1,GFRA4,GPC3,GPC6,LSAMP,LY6C1,MMP17,MMP19,MPP2,NCAM2,NEGR1,RAB3B,RAB3C,RECK,RGMA,RGMB,RGS7BP,RTN4RL2,SNAP25,SPRN,SYN1
GO:CC	plasma membrane signaling receptor complex	GO:0098802	0.000426851	3.36972	177	1312	29	21259	ACVRL1,CACNG4,CALCRL,CHRNA3,CHRNA5,CNTFR,CPT1C,DLG2,DLG4,EMILIN1,GABBR1,GRIA1,GRIA3,GRIA4,GRIK3,HTR3A,HTR3B,ITGA11,ITGA7,ITGA8,ITGA9,ITGB1,NPNT,OLFM1,OLFM2,PLP1,RAMP2,SHANK3,SHISA6
GO:CC	leading edge membrane	GO:0031256	0.000539998	3.26761	179	1312	29	21259	ANK1,ANTXR1,APC2,ARHGAP44,CDKL5,CNTNAP2,CSPG4,DLC1,FAM107A,FERMT2,GABBR1,GRIA1,HPCA,ITGA8,ITGB1,KANK1,KCNA2,KCNB1,KCNC2,KCNC4,MAPT,MPP2,MTSS1L,PSD,PSD3,SGCE,SHISA6,TACR3,WLS
GO:CC	axon terminus	GO:0043679	0.000539998	3.26761	179	1312	29	21259	ADCYAP1,ADRA2C,CACNA1B,CALB2,CHRM2,CPLX1,DBH,ESR1,GABRB3,GRIA3,GRIA4,GRIK3,KCNA2,KCNA6,KCNC2,KCNC4,KCNK2,NCS1,NOS1,NTSR1,OPRK1,PENK,PTPRN,ROR1,SLC18A2,SLC8A2,SNCA,SNCB,SYP
GO:CC	exocytic vesicle membrane	GO:0099501	0.000597636	3.22356	124	1312	23	21259	DLG2,DMD,GRIA1,OPRK1,PTPRS,RAB3B,RAB3C,RPH3A,SLC10A4,SLC18A2,SLC6A17,SNCA,SV2A,SV2B,SYN1,SYN2,SYNDIG1,SYNGR1,SYNGR3,SYP,SYT1,SYT6,SYT9
GO:CC	synaptic vesicle membrane	GO:0030672	0.000597636	3.22356	124	1312	23	21259	DLG2,DMD,GRIA1,OPRK1,PTPRS,RAB3B,RAB3C,RPH3A,SLC10A4,SLC18A2,SLC6A17,SNCA,SV2A,SV2B,SYN1,SYN2,SYNDIG1,SYNGR1,SYNGR3,SYP,SYT1,SYT6,SYT9
GO:CC	Schaffer collateral - CA1 synapse	GO:0098685	0.000701164	3.15418	99	1312	20	21259	ADCY1,AKAP12,APBA1,APBB1,CADM1,CDH11,CPLX1,DGKB,EPHA7,GABBR1,INA,ITGB1,LRRC4C,MPP2,NEFL,PRKAR1B,PTPRS,SYN1,SYN2,SYP
GO:CC	cytoskeleton	GO:0005856	0.000707373	3.15035	2249	1312	191	21259	ABLIM2,ABLIM3,ACTA2,ACTG2,ADCY5,ADGRB2,AHI1,AKAP12,ANK1,ANK2,ANXA1,APC2,ARHGAP6,AXL,BAG2,BBS1,BBS7,BRSK1,BRSK2,CALB2,CALD1,CAP2,CC2D2A,CCDC141,CCDC65,CCDC8,CDC42EP3,CDH2,CDKL5,CFL2,CLIP3,CLIP4,CLMP,CNN1,CNR1,CPEB1,CRYAB,CSRP1,CTNNA2,CTNNA3,DAPK1,DBH,DDR2,DENND2A,DES,DLC1,DLG4,DMD,DMTN,DNAL1,DYSF,DZIP1,DZIP1L,EHD2,ELAVL4,EML1,ENAH,EVC,EVC2,FAM107A,FAM83D,FBXL7,FERMT2,FEZ1,FGD1,FGD5,FGF13,FHOD3,FIL…
GO:CC	supramolecular complex	GO:0099080	0.000852458	3.06933	1322	1312	123	21259	ABCC9,ABLIM2,ACTA2,ACTG2,ANK1,ANK2,ANXA1,APC2,ATP2B4,BAG2,CACNA1C,CALD1,CASQ1,CASQ2,CAV3,CFL2,CLIP3,CLIP4,CLMP,COL16A1,COL1A1,COL1A2,COL3A1,COL4A5,COL5A1,COL5A2,COL5A3,CPEB1,CRYAB,CSRP1,DCN,DES,DMD,DMTN,DNAL1,DYSF,EML1,FBLN5,FBN1,FBXL22,FERMT2,FEZ1,FGF13,FHOD3,FKBP1B,FLNA,FLNC,FMN2,GAS2L2,GFAP,GJA1,HSPB1,INA,JAM3,JPH2,KCNA5,KCNJ8,KIF1A,KIF26B,KIF5A,KIF5C,KRT17,LMOD1,LTBP1,LUM,MAP1B,MAPT,MFAP2,MFA…
GO:CC	neurotransmitter receptor complex	GO:0098878	0.00108798	2.96338	54	1312	14	21259	CACNG4,CPT1C,DLG2,DLG4,GRIA1,GRIA3,GRIA4,GRIK3,HTR3A,HTR3B,OLFM1,OLFM2,SHANK3,SHISA6
GO:CC	transport vesicle membrane	GO:0030658	0.00118981	2.92452	186	1312	29	21259	DBH,DLG2,DMD,GRIA1,OPRK1,PAM,PTPRN,PTPRS,RAB11FIP5,RAB3B,RAB3C,RASSF9,RPH3A,SCG3,SLC10A4,SLC18A2,SLC6A17,SNCA,SV2A,SV2B,SYN1,SYN2,SYNDIG1,SYNGR1,SYNGR3,SYP,SYT1,SYT6,SYT9
GO:CC	adherens junction	GO:0005912	0.00120785	2.91799	157	1312	26	21259	AHI1,CD99L2,CDH11,CDH19,CDH2,CDH3,CDH5,CDH6,CTNNA2,CTNNA3,DCHS1,EFNA5,FERMT2,FRMD4A,ITGB1,LIN7B,NEXN,PDLIM3,PDLIM4,PDLIM7,PGM5,PTPRM,SHROOM4,SYNM,TMEM204,TMEM47
GO:CC	vesicle	GO:0031982	0.0014796	2.82986	2064	1312	176	21259	ABCC9,ACKR1,ACKR3,ACKR4,ADAMTS1,ADCY5,ADCYAP1R1,ADGRF5,ADGRL4,AGTR1A,AMOTL1,ANK2,ANXA1,AOAH,AOC3,AP3B2,APBA1,ARHGAP44,ASTN1,ASTN2,ATP1A2,BACE1,BDKRB2,BGN,BMP4,BMP5,BRSK1,C5AR1,CADM1,CADPS,CALCRL,CALY,CAV1,CAV2,CAV3,CD300LG,CD93,CLIP3,CLVS1,CNTNAP2,COL1A1,COPZ2,CRISPLD2,DAB2,DBH,DLG2,DLG4,DMD,DMTN,DNAJC6,DNER,DYSF,EHD2,EPN2,F2R,FGFR1,FMN2,FN1,FSTL3,GABBR1,GABRB3,GAL,GCGR,GFRA1,GJA1,GPR161,GPRC5B,G…
GO:CC	glial cell projection	GO:0097386	0.00158992	2.79862	35	1312	11	21259	ATP1B2,CNGA3,DMD,GFAP,ITGB1,KCNJ10,KCNK2,MAPT,SCN7A,SLC2A13,SYT4
GO:CC	cytoplasmic vesicle	GO:0031410	0.00196374	2.70692	1920	1312	165	21259	ABCC9,ACKR1,ACKR3,ACKR4,ADAMTS1,ADCY5,ADCYAP1R1,ADGRF5,ADGRL4,AGTR1A,AMOTL1,ANK2,ANXA1,AOAH,AOC3,AP3B2,APBA1,ARHGAP44,ASTN1,ASTN2,ATP1A2,BACE1,BDKRB2,BGN,BRSK1,C5AR1,CADM1,CADPS,CALCRL,CALY,CAV1,CAV2,CD300LG,CD93,CLIP3,CLVS1,CNTNAP2,COL1A1,COPZ2,CRISPLD2,DAB2,DBH,DLG2,DLG4,DMD,DMTN,DNER,DYSF,EHD2,EPN2,F2R,FGFR1,FMN2,FSTL3,GABBR1,GABRB3,GAL,GCGR,GFRA1,GJA1,GPR161,GRB14,GRIA1,HAS2,HIP1,ICA1L,IFITM3…
GO:CC	focal adhesion	GO:0005925	0.00225677	2.64651	182	1312	28	21259	CAV1,CAV2,CAV3,DLC1,EFS,ENAH,FAM107A,FERMT2,FLRT2,ITGA11,ITGB1,LIMS2,NEXN,NRP1,PARVA,PARVB,PDLIM7,PGM5,PHLDB2,SHROOM4,SORBS2,SORBS3,STARD8,SYNPO2,TEK,TGFB1I1,TNS1,TRIP6
GO:CC	intracellular vesicle	GO:0097708	0.00227838	2.64237	1925	1312	165	21259	ABCC9,ACKR1,ACKR3,ACKR4,ADAMTS1,ADCY5,ADCYAP1R1,ADGRF5,ADGRL4,AGTR1A,AMOTL1,ANK2,ANXA1,AOAH,AOC3,AP3B2,APBA1,ARHGAP44,ASTN1,ASTN2,ATP1A2,BACE1,BDKRB2,BGN,BRSK1,C5AR1,CADM1,CADPS,CALCRL,CALY,CAV1,CAV2,CD300LG,CD93,CLIP3,CLVS1,CNTNAP2,COL1A1,COPZ2,CRISPLD2,DAB2,DBH,DLG2,DLG4,DMD,DMTN,DNER,DYSF,EHD2,EPN2,F2R,FGFR1,FMN2,FSTL3,GABBR1,GABRB3,GAL,GCGR,GFRA1,GJA1,GPR161,GRB14,GRIA1,HAS2,HIP1,ICA1L,IFITM3…
GO:CC	cell-substrate junction	GO:0030055	0.00249836	2.60234	193	1312	29	21259	CAV1,CAV2,CAV3,DLC1,DMD,EFS,ENAH,FAM107A,FERMT2,FLRT2,ITGA11,ITGB1,LIMS2,NEXN,NRP1,PARVA,PARVB,PDLIM7,PGM5,PHLDB2,SHROOM4,SORBS2,SORBS3,STARD8,SYNPO2,TEK,TGFB1I1,TNS1,TRIP6
GO:CC	calcium channel complex	GO:0034704	0.00286367	2.54308	66	1312	15	21259	AKAP6,CACNA1B,CACNA1C,CACNA1G,CACNA1H,CACNA2D3,CACNB1,CACNB2,CACNG4,FKBP1B,HSPA2,MICU3,RYR2,TRDN,TRPC4
GO:CC	integral component of postsynaptic density membrane	GO:0099061	0.00333538	2.47685	59	1312	14	21259	ADAM22,ADCY1,ADRA2C,CACNG4,CLSTN2,CLSTN3,EPHA7,GRIA1,LRFN1,LRRC4B,LRRC4C,PTPRS,SHISA6,SLITRK3
GO:CC	collagen type V trimer	GO:0005588	0.00460012	2.33723	4	1312	4	21259	COL16A1,COL5A1,COL5A2,COL5A3
GO:CC	neuron projection membrane	GO:0032589	0.00729764	2.13682	71	1312	15	21259	ANK1,CNTNAP2,GABBR1,GRIA1,HPCA,ITGA8,KCNB1,KCNC2,KCNC4,MAPT,MPP2,SGCE,SHISA6,TACR3,WLS
GO:CC	interstitial matrix	GO:0005614	0.00745789	2.12738	16	1312	7	21259	ADAMTSL4,COL14A1,ECM2,EGFLAM,IGF1,KAZALD1,TNC
GO:CC	perinuclear region of cytoplasm	GO:0048471	0.00841708	2.07484	777	1312	77	21259	ACKR3,AKAP6,ANK2,APBA1,APBB1,APC2,APLN,APOD,BRSK2,CACNA1G,CAV1,CAV2,CDH13,CDKL5,CHODL,CPEB1,CTGF,CX3CR1,DMD,DMTN,EHD2,EML1,ESR1,FGFR1,FLNA,FMN2,HHATL,HMGCLL1,IFITM3,ITGB1,KCNA5,KCND2,KCND3,KCNH2,KIF5A,KIRREL,LAMB1,LGMN,LTBP1,MAGEE1,MAP1B,MAPK8IP1,MMD2,MRVI1,NCS1,NELL1,NOS1,OBSL1,PAM,PDLIM4,PRKAR2B,PTGES,PTN,PTPRM,RAB3B,RAB3C,RAB40B,RASIP1,RNF207,S100B,SCN5A,SEZ6,SLC2A12,SLC2A4,SNAP25,SNCA,SORBS2,…
GO:CC	intrinsic component of synaptic vesicle membrane	GO:0098563	0.0088268	2.0542	56	1312	13	21259	OPRK1,PTPRS,RAB3B,RAB3C,SLC10A4,SLC18A2,SLC6A17,SV2A,SYN1,SYNGR1,SYP,SYT1,SYT9
GO:CC	AMPA glutamate receptor complex	GO:0032281	0.00952257	2.02125	28	1312	9	21259	CACNG4,CPT1C,DLG4,GRIA1,GRIA3,GRIA4,OLFM1,OLFM2,SHISA6
GO:CC	cell body membrane	GO:0044298	0.0109196	1.96179	35	1312	10	21259	AMIGO1,ATP1B2,CX3CR1,HPCA,KCNA2,KCNB1,KCNC2,KCNC4,KCND2,TACR3
GO:CC	myelin sheath	GO:0043209	0.0126674	1.89731	210	1312	29	21259	ATP1A2,CNRIP1,CNTN1,CRYAB,EEF1A2,ENO2,GFAP,GJC2,GJC3,GNAO1,GNB4,HSPA2,INA,ITGB1,JAM3,LDHB,MPDZ,NAPB,NEFL,PLCB1,PLP1,SLC25A4,SNAP25,SYN1,SYN2,TAGLN3,TSPAN2,TUBB4A,UCHL1
GO:CC	catenin complex	GO:0016342	0.0130544	1.88424	29	1312	9	21259	APC2,CDH11,CDH13,CDH19,CDH2,CDH3,CDH5,CDH6,DCHS1
GO:CC	junctional membrane complex	GO:0030314	0.0135417	1.86833	8	1312	5	21259	CASQ2,JPH2,JPH3,JPH4,TRDN
GO:CC	secretory granule	GO:0030141	0.0186247	1.72991	408	1312	46	21259	ABCC9,CADPS,CAV1,CAV2,COL1A1,DBH,DMD,FSTL3,GAL,ICA1L,IGF1,IGFBP3,ITGB1,KIF1A,LOXL1,MOXD1,NCS1,NOS1,PAM,PCSK1N,PCSK2,PENK,PLA1A,PRKG1,PTPRN,RAB11FIP5,RAB12,RAB3B,RESP18,RPH3A,SCG2,SCG3,SELP,SERPINE2,SLC18A2,SLC2A4,SNCA,SPARC,SV2B,SYT1,SYT4,SYT9,TGFB2,TGFB3,THBS2,VWF
GO:CC	ionotropic glutamate receptor complex	GO:0008328	0.019012	1.72097	52	1312	12	21259	CACNG4,CPT1C,DLG2,DLG4,GRIA1,GRIA3,GRIA4,GRIK3,OLFM1,OLFM2,SHANK3,SHISA6
GO:CC	protein complex involved in cell adhesion	GO:0098636	0.023732	1.62467	38	1312	10	21259	EMILIN1,ITGA11,ITGA7,ITGA8,ITGA9,ITGB1,JAM2,JAM3,NPNT,PLP1
GO:CC	integral component of synaptic vesicle membrane	GO:0030285	0.023732	1.62467	38	1312	10	21259	OPRK1,PTPRS,SLC10A4,SLC18A2,SLC6A17,SV2A,SYNGR1,SYP,SYT1,SYT9
GO:CC	cell cortex	GO:0005938	0.0243519	1.61347	330	1312	39	21259	ANK1,ARHGEF9,ASTN2,BC034090,CALB2,CALD1,CAP2,CAV1,CDH2,CFL2,CRIP2,CTGF,CTNNA2,DLC1,DLG4,DMTN,ENO2,EXOC3L2,FERMT2,FGF1,FGFR2,FLNA,FMN2,FRMPD1,GNAI1,HMCN2,MTSS1L,MYH10,PDZD4,PHLDB2,PKD2,PLEKHH2,PPP1R9A,PRKD1,RIMS3,SHROOM4,SNCA,TMOD1,TRPC4
GO:CC	neuronal cell body membrane	GO:0032809	0.0309045	1.50998	32	1312	9	21259	AMIGO1,CX3CR1,HPCA,KCNA2,KCNB1,KCNC2,KCNC4,KCND2,TACR3
GO:CC	dense core granule	GO:0031045	0.0309045	1.50998	32	1312	9	21259	CADPS,KIF1A,NCS1,PENK,SCG2,SLC18A2,SYT1,SYT4,SYT9
GO:CC	actin filament	GO:0005884	0.0317356	1.49845	127	1312	20	21259	ANXA1,APC2,CALD1,DMTN,FLNA,FMN2,GAS2L2,JAM3,LMOD1,PDLIM3,PDLIM4,PDLIM7,PKD2,PLS3,SHROOM4,SMTN,TEK,TMOD1,TPM1,TPM2
GO:CC	platelet alpha granule	GO:0031091	0.0406069	1.3914	20	1312	7	21259	IGF1,IGFBP3,SELP,SERPINE2,SNCA,SPARC,THBS2
GO:CC	terminal bouton	GO:0043195	0.0420054	1.3767	82	1312	15	21259	ADCYAP1,CALB2,CPLX1,DBH,ESR1,GABRB3,GRIA3,GRIA4,GRIK3,KCNC2,NTSR1,SLC18A2,SNCA,SNCB,SYP
GO:CC	dendrite membrane	GO:0032590	0.0499955	1.30107	49	1312	11	21259	GRIA1,HPCA,ITGA8,KCNB1,KCNC2,KCNC4,MPP2,SGCE,SHISA6,TACR3,WLS
KEGG	Focal adhesion	KEGG:04510	7.76366e-17	16.1099	196	517	50	8477	CAV1,CAV2,CAV3,COL1A1,COL1A2,COL4A5,COL6A1,COL6A2,COL6A3,COL6A4,COL9A2,FLNA,FLNC,FLT1,FLT4,FN1,HGF,IGF1,IGF1R,ITGA11,ITGA7,ITGA8,ITGA9,ITGB1,KDR,LAMA1,LAMA2,LAMA4,LAMB1,LAMB2,LAMC3,MAPK10,MYL9,MYLK,PARVA,PARVB,PDGFD,PDGFRA,PDGFRB,PPP1R12B,PPP1R12C,SHC2,SHC4,THBS2,THBS3,TNC,TNXB,VEGFB,VTN,VWF
KEGG	Calcium signaling pathway	KEGG:04020	4.27885e-15	14.3687	238	517	53	8477	ADCY1,AGTR1A,ATP2B3,ATP2B4,BDKRB2,CACNA1B,CACNA1C,CACNA1G,CACNA1H,CAMK1G,CASQ1,CASQ2,CHRM2,EDNRA,EDNRB,F2R,FGF1,FGF18,FGF2,FGF7,FGFR1,FGFR2,FLT1,FLT4,GDNF,GRPR,HGF,KDR,MYLK,NGF,NOS1,NOS3,NTSR1,P2RX6,PDE1A,PDGFD,PDGFRA,PDGFRB,PLCB1,PLCB4,PLN,PTGER1,PTGER3,PTGFR,RYR2,SLC25A4,SLC8A1,SLC8A2,TACR1,TACR2,TACR3,TRDN,VEGFB
KEGG	ECM-receptor interaction	KEGG:04512	1.31327e-13	12.8816	87	517	30	8477	COL1A1,COL1A2,COL4A5,COL6A1,COL6A2,COL6A3,COL6A4,COL9A2,FN1,FREM2,ITGA11,ITGA7,ITGA8,ITGA9,ITGB1,LAMA1,LAMA2,LAMA4,LAMB1,LAMB2,LAMC3,NPNT,SV2A,SV2B,THBS2,THBS3,TNC,TNXB,VTN,VWF
KEGG	Dilated cardiomyopathy	KEGG:05414	4.21438e-12	11.3753	91	517	29	8477	ADCY1,ADCY5,CACNA1C,CACNA2D3,CACNB1,CACNB2,CACNG4,DES,DMD,IGF1,ITGA11,ITGA7,ITGA8,ITGA9,ITGB1,LAMA1,LAMA2,PLN,RYR2,SGCA,SGCB,SGCD,SLC8A1,SLC8A2,TGFB2,TGFB3,TNNT2,TPM1,TPM2
KEGG	Hypertrophic cardiomyopathy	KEGG:05410	9.15258e-11	10.0385	88	517	27	8477	CACNA1C,CACNA2D3,CACNB1,CACNB2,CACNG4,DES,DMD,IGF1,ITGA11,ITGA7,ITGA8,ITGA9,ITGB1,LAMA1,LAMA2,PRKAB2,RYR2,SGCA,SGCB,SGCD,SLC8A1,SLC8A2,TGFB2,TGFB3,TNNT2,TPM1,TPM2
KEGG	Arrhythmogenic right ventricular cardiomyopathy	KEGG:05412	4.55882e-10	9.34115	74	517	24	8477	CACNA1C,CACNA2D3,CACNB1,CACNB2,CACNG4,CDH2,CTNNA2,CTNNA3,DES,DMD,GJA1,ITGA11,ITGA7,ITGA8,ITGA9,ITGB1,LAMA1,LAMA2,RYR2,SGCA,SGCB,SGCD,SLC8A1,SLC8A2
KEGG	PI3K-Akt signaling pathway	KEGG:04151	7.6131e-10	9.11844	354	517	57	8477	ANGPT1,CHRM2,COL1A1,COL1A2,COL4A5,COL6A1,COL6A2,COL6A3,COL6A4,COL9A2,EFNA5,EIF4EBP1,EPOR,F2R,FGF1,FGF18,FGF2,FGF7,FGFR1,FGFR2,FLT1,FLT4,FN1,GNB4,GNG7,GNG8,HGF,IGF1,IGF1R,IRS1,ITGA11,ITGA7,ITGA8,ITGA9,ITGB1,KDR,LAMA1,LAMA2,LAMA4,LAMB1,LAMB2,LAMC3,NGF,NOS3,PDGFD,PDGFRA,PDGFRB,PPP2R2B,PPP2R2C,TEK,THBS2,THBS3,TNC,TNXB,VEGFB,VTN,VWF
KEGG	Proteoglycans in cancer	KEGG:05205	5.00932e-08	7.30022	196	517	37	8477	ANK1,ANK2,CAV1,CAV2,CAV3,COL1A1,COL1A2,DCN,ESR1,FGF2,FGFR1,FLNA,FLNC,FN1,FZD1,FZD2,GPC3,HGF,HPSE2,IGF1,IGF1R,ITGB1,KDR,LUM,MMP2,MRAS,PLAU,PPP1R12B,PPP1R12C,SDC2,SMO,TGFB2,TIMP3,TWIST1,VTN,WNT2B,WNT9A
KEGG	cGMP-PKG signaling pathway	KEGG:04022	1.56447e-07	6.80563	168	517	33	8477	ADCY1,ADCY5,ADRA2B,ADRA2C,AGTR1A,ATP1A2,ATP1B2,ATP2B3,ATP2B4,BDKRB2,CACNA1C,EDNRA,EDNRB,GNAI1,IRS1,KCNJ8,KCNMA1,KCNMB1,MRVI1,MYL9,MYLK,NFATC4,NOS3,NPR1,NPR2,PLCB1,PLCB4,PLN,PRKG1,SLC25A4,SLC8A1,SLC8A2,TRPC6
KEGG	Neuroactive ligand-receptor interaction	KEGG:04080	2.52515e-07	6.59771	356	517	52	8477	ADCYAP1,ADCYAP1R1,ADRA2B,ADRA2C,AGTR1A,APLN,APLNR,BDKRB2,C3AR1,C5AR1,CALCRL,CHRM2,CHRNA3,CHRNA5,CNR1,EDNRA,EDNRB,F2R,GABBR1,GABRB3,GAL,GALR2,GCGR,GLP2R,GLRB,GRIA1,GRIA3,GRIA4,GRIK3,GRPR,LEPR,NMUR1,NPY1R,NPY2R,NPY4R,NTSR1,OPRK1,OPRL1,P2RX6,P2RY14,P2RY6,PENK,PTGER1,PTGER3,PTGFR,PTGIR,PTH1R,SSTR1,SSTR4,TACR1,TACR2,TACR3
KEGG	Protein digestion and absorption	KEGG:04974	3.9901e-07	6.39902	107	517	25	8477	ATP1A2,ATP1B2,COL12A1,COL14A1,COL16A1,COL18A1,COL1A1,COL1A2,COL23A1,COL28A1,COL3A1,COL4A5,COL5A1,COL5A2,COL5A3,COL6A1,COL6A2,COL6A3,COL6A4,COL8A1,COL8A2,COL9A2,SLC36A4,SLC8A1,SLC8A2
KEGG	Pathways in cancer	KEGG:05200	1.59301e-05	4.79778	529	517	63	8477	ADCY1,ADCY5,AGTR1A,APC2,BDKRB2,BMP4,COL4A5,CTNNA2,CTNNA3,CXCL12,DAPK1,EDNRA,EDNRB,EPOR,ESR1,F2R,FGF1,FGF18,FGF2,FGF7,FGFR1,FGFR2,FLT4,FN1,FZD1,FZD2,GLI2,GLI3,GNAI1,GNB4,GNG7,GNG8,HEY2,HGF,HHIP,IGF1,IGF1R,ITGB1,KIF7,LAMA1,LAMA2,LAMA4,LAMB1,LAMB2,LAMC3,MAPK10,MMP2,NOTCH3,PDGFRA,PDGFRB,PLCB1,PLCB4,PTGER1,PTGER3,PTGS2,RUNX1T1,SMO,TGFB2,TGFB3,VEGFB,WNT2B,WNT9A,ZBTB16
KEGG	Adrenergic signaling in cardiomyocytes	KEGG:04261	1.60921e-05	4.79339	145	517	27	8477	ADCY1,ADCY5,AGTR1A,ATP1A2,ATP1B2,ATP2B3,ATP2B4,CACNA1C,CACNA2D3,CACNB1,CACNB2,CACNG4,GNAI1,PLCB1,PLCB4,PLN,PPP2R2B,PPP2R2C,RYR2,SCN1B,SCN5A,SCN7A,SLC8A1,SLC8A2,TNNT2,TPM1,TPM2
KEGG	Circadian entrainment	KEGG:04713	2.90898e-05	4.53626	97	517	21	8477	ADCY1,ADCY5,ADCYAP1,ADCYAP1R1,CACNA1C,CACNA1G,CACNA1H,GNAI1,GNAO1,GNB4,GNG7,GNG8,GRIA1,GRIA3,GRIA4,KCNJ5,NOS1,PLCB1,PLCB4,PRKG1,RYR2
KEGG	Axon guidance	KEGG:04360	4.17323e-05	4.37953	180	517	30	8477	ABLIM2,ABLIM3,BOC,CFL2,CXCL12,EFNA5,ENAH,EPHA7,GNAI1,ITGB1,LRRC4C,MYL9,NFATC4,NRP1,NTN1,PLXNA4,PLXNB3,RGMA,ROBO1,ROBO2,SEMA3A,SEMA3F,SEMA3G,SLIT2,SLIT3,SMO,TRPC1,TRPC3,TRPC4,TRPC6
KEGG	Rap1 signaling pathway	KEGG:04015	5.00054e-05	4.30098	211	517	33	8477	ADCY1,ADCY5,ANGPT1,CNR1,DOCK4,EFNA5,ENAH,F2R,FGF1,FGF18,FGF2,FGF7,FGFR1,FGFR2,FLT1,FLT4,GNAI1,GNAO1,HGF,IGF1,IGF1R,ITGB1,KDR,MRAS,NGF,PDGFD,PDGFRA,PDGFRB,PLCB1,PLCB4,PRKD1,TEK,VEGFB
KEGG	MAPK signaling pathway	KEGG:04010	6.36596e-05	4.19614	286	517	40	8477	ANGPT1,CACNA1B,CACNA1C,CACNA1G,CACNA1H,CACNA2D3,CACNB1,CACNB2,CACNG4,EFNA5,FGF1,FGF18,FGF2,FGF7,FGFR1,FGFR2,FLNA,FLNC,FLT1,FLT4,HGF,HSPA2,HSPB1,IGF1,IGF1R,IL1R1,KDR,MAPK10,MAPK8IP1,MAPK8IP2,MAPT,MRAS,NGF,PDGFD,PDGFRA,PDGFRB,TEK,TGFB2,TGFB3,VEGFB
KEGG	Vascular smooth muscle contraction	KEGG:04270	0.000106328	3.97335	140	517	25	8477	ACTA2,ACTG2,ADCY1,ADCY5,AGTR1A,CACNA1C,CALCRL,CALD1,EDNRA,KCNMA1,KCNMB1,MRVI1,MYH10,MYH11,MYL9,MYLK,NPR1,NPR2,PLCB1,PLCB4,PPP1R12B,PPP1R12C,PRKG1,PTGIR,RAMP2
KEGG	Oxytocin signaling pathway	KEGG:04921	0.000270068	3.56853	147	517	25	8477	ADCY1,ADCY5,CACNA1C,CACNA2D3,CACNB1,CACNB2,CACNG4,CAMK1G,GNAI1,GNAO1,KCNJ12,KCNJ5,MYL9,MYLK,NFATC4,NOS3,NPR1,NPR2,PLCB1,PLCB4,PPP1R12B,PPP1R12C,PRKAB2,PTGS2,RYR2
KEGG	Relaxin signaling pathway	KEGG:04926	0.000797723	3.09815	127	517	22	8477	ACTA2,ADCY1,ADCY5,COL1A1,COL1A2,COL3A1,COL4A5,EDNRB,GNAI1,GNAO1,GNB4,GNG7,GNG8,MAPK10,MMP2,NOS1,NOS3,PLCB1,PLCB4,SHC2,SHC4,VEGFB
KEGG	cAMP signaling pathway	KEGG:04024	0.00110842	2.9553	210	517	30	8477	ADCY1,ADCY5,ADCYAP1,ADCYAP1R1,ATP1A2,ATP1B2,ATP2B3,ATP2B4,CACNA1C,CHRM2,CNGA3,EDNRA,F2R,FXYD1,GABBR1,GLI3,GNAI1,GRIA1,GRIA3,GRIA4,HCAR1,HHIP,MAPK10,MYL9,NPR1,NPY1R,PLN,PTGER3,RYR2,SSTR1
KEGG	Amoebiasis	KEGG:05146	0.00132154	2.87892	103	517	19	8477	ADCY1,COL1A1,COL1A2,COL3A1,COL4A5,FN1,HSPB1,IL1R1,LAMA1,LAMA2,LAMA4,LAMB1,LAMB2,LAMC3,PLCB1,PLCB4,RAB7B,TGFB2,TGFB3
KEGG	Cell adhesion molecules	KEGG:04514	0.00159784	2.79647	162	517	25	8477	CADM1,CADM3,CD99L2,CDH2,CDH3,CDH5,CNTN1,CNTNAP2,ITGA8,ITGA9,ITGB1,JAM2,JAM3,LRRC4B,LRRC4C,NCAM1,NCAM2,NEGR1,NLGN2,PTPRM,SDC2,SDC3,SELP,SIGLEC1,VCAN
KEGG	Regulation of actin cytoskeleton	KEGG:04810	0.00213144	2.67133	217	517	30	8477	APC2,BDKRB2,CFL2,CHRM2,CXCL12,ENAH,F2R,FGD1,FGF1,FGF18,FGF2,FGF7,FGFR1,FGFR2,FN1,ITGA11,ITGA7,ITGA8,ITGA9,ITGB1,MRAS,MYH10,MYH11,MYL9,MYLK,PDGFD,PDGFRA,PDGFRB,PPP1R12B,PPP1R12C
KEGG	Apelin signaling pathway	KEGG:04371	0.0021818	2.66118	135	517	22	8477	ACTA2,ADCY1,ADCY5,AGTR1A,APLN,APLNR,CTGF,GNAI1,GNB4,GNG7,GNG8,MRAS,MYLK,NOS1,NOS3,NOTCH3,PLCB1,PLCB4,PRKAB2,RYR2,SLC8A1,SLC8A2
KEGG	Complement and coagulation cascades	KEGG:04610	0.003193	2.4958	91	517	17	8477	BDKRB2,C1RA,C1S1,C3AR1,C5AR1,C6,C7,CFH,F13A1,F2R,F3,PLAU,PROS1,SERPING1,THBD,VTN,VWF
KEGG	Dopaminergic synapse	KEGG:04728	0.0034153	2.46657	129	517	21	8477	ADCY5,CACNA1B,CACNA1C,CALY,GNAI1,GNAO1,GNB4,GNG7,GNG8,GRIA1,GRIA3,GRIA4,KCNJ5,KIF5A,KIF5C,MAPK10,PLCB1,PLCB4,PPP2R2B,PPP2R2C,SLC18A2
KEGG	Cholinergic synapse	KEGG:04725	0.00348278	2.45807	110	517	19	8477	ADCY1,ADCY5,CACNA1B,CACNA1C,CHRM2,CHRNA3,GNAI1,GNAO1,GNB4,GNG7,GNG8,KCNJ12,KCNQ2,KCNQ3,KCNQ4,PLCB1,PLCB4,SLC18A3,SLC5A7
KEGG	Hippo signaling pathway	KEGG:04390	0.00535929	2.27089	153	517	23	8477	APC2,BMP4,BMP5,CTGF,CTNNA2,CTNNA3,DLG2,DLG4,FGF1,FRMD6,FZD1,FZD2,GLI2,NKD1,NKD2,PPP2R2B,PPP2R2C,SNAI2,TGFB2,TGFB3,WNT2B,WNT9A,WWTR1
KEGG	Aldosterone synthesis and secretion	KEGG:04925	0.0110768	1.95559	100	517	17	8477	ADCY1,ADCY5,AGTR1A,ATP1A2,ATP1B2,ATP2B3,ATP2B4,CACNA1C,CACNA1G,CACNA1H,CAMK1G,KCNJ5,KCNK3,NPR1,PLCB1,PLCB4,PRKD1
KEGG	Cardiac muscle contraction	KEGG:04260	0.0138513	1.85851	83	517	15	8477	ATP1A2,ATP1B2,CACNA1C,CACNA2D3,CACNB1,CACNB2,CACNG4,CASQ2,RYR2,SLC8A1,SLC8A2,TNNT2,TPM1,TPM2,TRDN
KEGG	Human papillomavirus infection	KEGG:05165	0.0154988	1.8097	347	517	39	8477	APC2,COL1A1,COL1A2,COL4A5,COL6A1,COL6A2,COL6A3,COL6A4,COL9A2,DLG2,EIF4EBP1,FN1,FZD1,FZD2,HEY2,ITGA11,ITGA7,ITGA8,ITGA9,ITGB1,LAMA1,LAMA2,LAMA4,LAMB1,LAMB2,LAMC3,NOTCH3,PDGFRB,PPP2R2B,PPP2R2C,PTGS2,THBS2,THBS3,TNC,TNXB,VTN,VWF,WNT2B,WNT9A
KEGG	TGF-beta signaling pathway	KEGG:04350	0.0173644	1.76034	94	517	16	8477	BMP4,BMP5,CHRD,DCN,FBN1,GREM1,GREM2,ID4,LTBP1,NOG,RGMA,RGMB,SMAD9,TGFB2,TGFB3,THSD4
KEGG	Hedgehog signaling pathway	KEGG:04340	0.0263513	1.5792	52	517	11	8477	BOC,DHH,EVC,EVC2,GAS1,GLI2,GLI3,GPR161,HHIP,KIF7,SMO
KEGG	AGE-RAGE signaling pathway in diabetic complications	KEGG:04933	0.0322326	1.4917	99	517	16	8477	AGTR1A,COL1A1,COL1A2,COL3A1,COL4A5,F3,FN1,MAPK10,MMP2,NOS3,PLCB1,PLCB4,TGFB2,TGFB3,THBD,VEGFB
KEGG	Ras signaling pathway	KEGG:04014	0.0346821	1.45989	229	517	28	8477	ANGPT1,EFNA5,FGF1,FGF18,FGF2,FGF7,FGFR1,FGFR2,FLT1,FLT4,GNB4,GNG7,GNG8,HGF,IGF1,IGF1R,KDR,MAPK10,MRAS,NGF,PDGFD,PDGFRA,PDGFRB,PLA1A,SHC2,SHC4,TEK,VEGFB
KEGG	Retrograde endocannabinoid signaling	KEGG:04723	0.0441647	1.35492	143	517	20	8477	ADCY1,ADCY5,CACNA1B,CACNA1C,CNR1,GABRB3,GNAI1,GNAO1,GNB4,GNG7,GNG8,GRIA1,GRIA3,GRIA4,KCNJ5,MAPK10,MGLL,PLCB1,PLCB4,PTGS2
KEGG	Glutamatergic synapse	KEGG:04724	0.0453092	1.34381	112	517	17	8477	ADCY1,ADCY5,CACNA1C,DLG4,GNAI1,GNAO1,GNB4,GNG7,GNG8,GRIA1,GRIA3,GRIA4,GRIK3,PLCB1,PLCB4,SHANK3,TRPC1
KEGG	Insulin secretion	KEGG:04911	0.048645	1.31296	83	517	14	8477	ADCY1,ADCY5,ADCYAP1,ADCYAP1R1,ATP1A2,ATP1B2,CACNA1C,KCNMA1,KCNMB1,KCNN3,PLCB1,PLCB4,RYR2,SNAP25
REAC	Extracellular matrix organization	REAC:R-MMU-1474244	1.20126e-25	24.9204	253	600	74	8684	ADAMTS4,BGN,BMP4,COL12A1,COL14A1,COL16A1,COL18A1,COL1A1,COL1A2,COL23A1,COL28A1,COL3A1,COL4A5,COL5A1,COL5A2,COL5A3,COL6A1,COL6A2,COL6A3,COL8A1,COL8A2,COLGALT2,CRTAP,DCN,DDR2,EFEMP2,EMILIN1,FBLN2,FBLN5,FBN1,FGF2,FN1,ITGA8,ITGA9,ITGB1,JAM2,JAM3,LAMA1,LAMA2,LAMA4,LAMB1,LAMB2,LAMC3,LOXL2,LOXL4,LTBP1,LTBP3,LTBP4,LUM,MFAP4,MMP11,MMP16,MMP17,MMP19,MMP2,NID1,P3H1,P3H2,P3H3,P4HA2,PCOLCE,PCOLCE2,PLOD2,PXDN,…
REAC	Muscle contraction	REAC:R-MMU-397014	2.21831e-19	18.654	169	600	53	8684	ABCC9,ACTA2,ACTG2,ATP1A2,ATP1B2,ATP2B3,ATP2B4,CACNA1C,CACNA2D3,CACNB1,CACNB2,CACNG4,CALD1,CASQ1,CASQ2,CAV3,DES,DMD,DMPK,DYSF,FGF13,FKBP1B,FXYD1,FXYD6,FXYD7,KCND2,KCND3,KCNE4,KCNIP2,KCNIP4,KCNJ12,KCNK13,KCNK2,KCNK3,MYL1,MYL9,MYLK,NOS1,NPR1,NPR2,PLN,RYR2,SCN11A,SCN1B,SCN5A,SCN7A,SLC8A2,SORBS3,TMOD1,TNNT2,TPM1,TPM2,TRDN
REAC	Collagen biosynthesis and modifying enzymes	REAC:R-MMU-1650814	4.9958e-15	14.3014	59	600	28	8684	COL12A1,COL14A1,COL16A1,COL18A1,COL1A1,COL1A2,COL23A1,COL28A1,COL3A1,COL4A5,COL5A1,COL5A2,COL5A3,COL6A1,COL6A2,COL6A3,COL8A1,COL8A2,COLGALT2,CRTAP,P3H1,P3H2,P3H3,P4HA2,PCOLCE,PCOLCE2,PLOD2,SERPINH1
REAC	Neuronal System	REAC:R-MMU-112316	5.46614e-15	14.2623	312	600	67	8684	ABCC9,ADCY1,ADCY5,APBA1,ARHGEF9,CACNA1B,CACNA2D3,CACNB1,CACNB2,CACNG4,CHRNA3,CHRNA5,CPLX1,DLG2,DLG4,GABBR1,GABRB3,GJC1,GLRB,GNAI1,GNB4,GNG7,GNG8,GRIA1,GRIA3,GRIA4,GRIK3,HTR3B,KCNA2,KCNA5,KCNA6,KCNAB1,KCNB1,KCNC2,KCNC4,KCND2,KCND3,KCNG1,KCNJ10,KCNJ12,KCNJ5,KCNJ8,KCNK13,KCNK2,KCNK3,KCNN3,KCNQ3,KCNQ4,LIN7B,LRFN1,LRRC4B,LRRTM1,NEFL,NLGN2,PLCB1,PRKAR1B,PRKAR2B,PTPRS,SHANK3,SLC18A2,SLC5A7,SLITRK3,SLITR…
REAC	Cardiac conduction	REAC:R-MMU-5576891	2.53878e-14	13.5954	115	600	38	8684	ABCC9,ATP1A2,ATP1B2,ATP2B3,ATP2B4,CACNA1C,CACNA2D3,CACNB1,CACNB2,CACNG4,CASQ1,CASQ2,DMPK,FGF13,FKBP1B,FXYD1,FXYD6,FXYD7,KCND2,KCND3,KCNE4,KCNIP2,KCNIP4,KCNJ12,KCNK13,KCNK2,KCNK3,NOS1,NPR1,NPR2,PLN,RYR2,SCN11A,SCN1B,SCN5A,SCN7A,SLC8A2,TRDN
REAC	Collagen formation	REAC:R-MMU-1474290	7.43083e-14	13.129	79	600	31	8684	COL12A1,COL14A1,COL16A1,COL18A1,COL1A1,COL1A2,COL23A1,COL28A1,COL3A1,COL4A5,COL5A1,COL5A2,COL5A3,COL6A1,COL6A2,COL6A3,COL8A1,COL8A2,COLGALT2,CRTAP,LOXL2,LOXL4,P3H1,P3H2,P3H3,P4HA2,PCOLCE,PCOLCE2,PLOD2,PXDN,SERPINH1
REAC	Integrin cell surface interactions	REAC:R-MMU-216083	2.50779e-10	9.60071	67	600	25	8684	COL16A1,COL18A1,COL1A1,COL1A2,COL23A1,COL3A1,COL4A5,COL5A1,COL5A2,COL5A3,COL6A1,COL6A2,COL6A3,COL8A1,COL8A2,FBN1,FN1,ITGA8,ITGA9,ITGB1,JAM2,JAM3,LUM,TNC,VTN
REAC	ECM proteoglycans	REAC:R-MMU-3000178	8.90523e-10	9.05035	40	600	19	8684	BGN,COL1A1,COL1A2,COL3A1,COL5A1,COL5A2,COL5A3,COL6A1,COL6A2,COL6A3,DCN,FN1,ITGA8,ITGA9,ITGB1,SPARC,TNC,TNXB,VTN
REAC	Collagen chain trimerization	REAC:R-MMU-8948216	3.62853e-09	8.44027	38	600	18	8684	COL12A1,COL14A1,COL16A1,COL18A1,COL1A1,COL1A2,COL23A1,COL28A1,COL3A1,COL4A5,COL5A1,COL5A2,COL5A3,COL6A1,COL6A2,COL6A3,COL8A1,COL8A2
REAC	MET activates PTK2 signaling	REAC:R-MMU-8874081	4.95129e-09	8.30528	26	600	15	8684	COL1A1,COL1A2,COL3A1,COL5A1,COL5A2,COL5A3,FN1,HGF,ITGB1,LAMA1,LAMA2,LAMA4,LAMB1,LAMB2,LAMC3
REAC	Elastic fibre formation	REAC:R-MMU-1566948	2.5611e-08	7.59157	37	600	17	8684	BMP4,EFEMP2,EMILIN1,FBLN2,FBLN5,FBN1,FN1,ITGA8,ITGB1,LOXL2,LOXL4,LTBP1,LTBP3,LTBP4,MFAP4,TGFB2,VTN
REAC	Assembly of collagen fibrils and other multimeric structures	REAC:R-MMU-2022090	6.20696e-08	7.20712	54	600	20	8684	COL12A1,COL14A1,COL18A1,COL1A1,COL1A2,COL23A1,COL3A1,COL4A5,COL5A1,COL5A2,COL5A3,COL6A1,COL6A2,COL6A3,COL8A1,COL8A2,LOXL2,LOXL4,PCOLCE,PXDN
REAC	Transmission across Chemical Synapses	REAC:R-MMU-112315	1.2945e-07	6.8879	196	600	40	8684	ADCY1,ADCY5,APBA1,ARHGEF9,CACNA1B,CACNA2D3,CACNB1,CACNB2,CACNG4,CHRNA3,CHRNA5,CPLX1,DLG2,DLG4,GABBR1,GABRB3,GLRB,GNAI1,GNB4,GNG7,GNG8,GRIA1,GRIA3,GRIA4,GRIK3,HTR3B,KCNJ10,KCNJ12,KCNJ5,LIN7B,NEFL,PLCB1,PRKAR1B,PRKAR2B,SLC18A2,SLC5A7,SNAP25,SYN1,SYN2,SYT1
REAC	Molecules associated with elastic fibres	REAC:R-MMU-2129379	1.39016e-07	6.85693	31	600	15	8684	BMP4,EFEMP2,EMILIN1,FBLN2,FBLN5,FBN1,FN1,ITGA8,ITGB1,LTBP1,LTBP3,LTBP4,MFAP4,TGFB2,VTN
REAC	Potassium Channels	REAC:R-MMU-1296071	4.41651e-07	6.35492	84	600	24	8684	ABCC9,GABBR1,GNG7,GNG8,KCNA2,KCNA5,KCNA6,KCNAB1,KCNB1,KCNC2,KCNC4,KCND2,KCND3,KCNG1,KCNJ10,KCNJ12,KCNJ5,KCNJ8,KCNK13,KCNK2,KCNK3,KCNN3,KCNQ3,KCNQ4
REAC	Non-integrin membrane-ECM interactions	REAC:R-MMU-3000171	7.06064e-07	6.15116	34	600	15	8684	COL1A1,COL1A2,COL23A1,COL3A1,COL4A5,COL5A1,COL5A2,COL5A3,DDR2,FGF2,FN1,ITGB1,SDC2,SDC3,VTN
REAC	MET promotes cell motility	REAC:R-MMU-8875878	1.85952e-06	5.7306	36	600	15	8684	COL1A1,COL1A2,COL3A1,COL5A1,COL5A2,COL5A3,FN1,HGF,ITGB1,LAMA1,LAMA2,LAMA4,LAMB1,LAMB2,LAMC3
REAC	Ion homeostasis	REAC:R-MMU-5578775	6.77379e-06	5.16917	50	600	17	8684	ABCC9,ATP1A2,ATP1B2,ATP2B3,ATP2B4,CASQ1,CASQ2,DMPK,FKBP1B,FXYD1,FXYD6,FXYD7,NOS1,PLN,RYR2,SLC8A2,TRDN
REAC	Degradation of the extracellular matrix	REAC:R-MMU-1474228	1.45919e-05	4.83589	121	600	27	8684	ADAMTS4,COL12A1,COL18A1,COL1A1,COL1A2,COL23A1,COL3A1,COL4A5,COL5A1,COL5A2,COL5A3,COL6A1,COL6A2,COL6A3,COL8A1,COL8A2,DCN,FBN1,FN1,MMP11,MMP16,MMP17,MMP19,MMP2,NID1,SCUBE1,SPOCK3
REAC	Collagen degradation	REAC:R-MMU-1442490	1.82682e-05	4.7383	53	600	17	8684	COL12A1,COL18A1,COL1A1,COL1A2,COL23A1,COL3A1,COL4A5,COL5A1,COL5A2,COL5A3,COL6A1,COL6A2,COL6A3,COL8A1,COL8A2,MMP11,MMP2
REAC	Regulation of Insulin-like Growth Factor (IGF) transport and uptake by Insulin-like Growth Factor Binding Proteins (IGFBPs)	REAC:R-MMU-381426	3.86334e-05	4.41304	111	600	25	8684	APOL7C,BMP4,CDH2,CHRDL1,FBN1,FN1,FSTL1,FSTL3,GPC3,IGF1,IGFBP2,IGFBP3,IGFBP4,IGFBP5,LAMB1,LAMB2,LTBP1,MXRA8,PAPPA,PENK,SCG2,SCG3,SDC2,SPARCL1,TNC
REAC	O-glycosylation of TSR domain-containing proteins	REAC:R-MMU-5173214	6.84292e-05	4.16476	34	600	13	8684	ADAMTS1,ADAMTS18,ADAMTS4,ADAMTS7,ADAMTSL1,ADAMTSL3,ADAMTSL4,SBSPON,SPON1,SPON2,THBS2,THSD4,THSD7B
REAC	Laminin interactions	REAC:R-MMU-3000157	0.000113324	3.94568	25	600	11	8684	COL18A1,COL23A1,COL4A5,ITGB1,LAMA1,LAMA2,LAMA4,LAMB1,LAMB2,LAMC3,NID1
REAC	Neurotransmitter receptors and postsynaptic signal transmission	REAC:R-MMU-112314	0.00011528	3.93825	133	600	27	8684	ADCY1,ADCY5,ARHGEF9,CACNG4,CHRNA3,CHRNA5,DLG2,DLG4,GABBR1,GABRB3,GLRB,GNAI1,GNB4,GNG7,GNG8,GRIA1,GRIA3,GRIA4,GRIK3,HTR3B,KCNJ10,KCNJ12,KCNJ5,NEFL,PLCB1,PRKAR1B,PRKAR2B
REAC	GPCR ligand binding	REAC:R-MMU-500792	0.000179103	3.7469	378	600	53	8684	ACKR3,ACKR4,ADCYAP1,ADCYAP1R1,ADGRE1,ADRA2C,AGTR1A,ANXA1,APLN,APLNR,BDKRB2,C3AR1,C5AR1,CALCRL,CHRM2,CNR1,CX3CR1,CXCL12,EDNRA,EDNRB,F2R,GABBR1,GAL,GALR2,GLP2R,GNB4,GNG7,GNG8,GPBAR1,GPR37,GPR37L1,GPR4,GRPR,NMUR1,NPY1R,NPY2R,NPY4R,NTSR1,OPRK1,OPRL1,P2RY14,P2RY6,PENK,PTGER1,PTGFR,PTGIR,PTH1R,RAMP2,SSTR1,TACR1,TACR2,TACR3,XCR1
REAC	Cell junction organization	REAC:R-MMU-446728	0.000298201	3.52549	63	600	17	8684	CADM1,CADM3,CDH11,CDH13,CDH2,CDH3,CDH5,CDH6,FERMT2,FLNA,FLNC,ITGB1,LIMS2,PARVA,PARVB,SDK1,SDK2
REAC	NCAM1 interactions	REAC:R-MMU-419037	0.000370837	3.43082	18	600	9	8684	COL23A1,COL3A1,COL4A5,COL5A1,COL5A2,COL5A3,COL6A1,COL6A2,COL6A3
REAC	Post-translational protein phosphorylation	REAC:R-MMU-8957275	0.000836237	3.07767	105	600	22	8684	APOL7C,BMP4,CDH2,CHRDL1,FBN1,FN1,FSTL1,FSTL3,GPC3,IGFBP3,IGFBP4,IGFBP5,LAMB1,LAMB2,LTBP1,MXRA8,PENK,SCG2,SCG3,SDC2,SPARCL1,TNC
REAC	Peptide ligand-binding receptors	REAC:R-MMU-375276	0.000877363	3.05682	191	600	32	8684	ACKR3,ACKR4,AGTR1A,ANXA1,APLN,APLNR,BDKRB2,C3AR1,C5AR1,CX3CR1,CXCL12,EDNRA,EDNRB,F2R,GAL,GALR2,GPR37,GPR37L1,GRPR,NMUR1,NPY1R,NPY2R,NPY4R,NTSR1,OPRK1,OPRL1,PENK,SSTR1,TACR1,TACR2,TACR3,XCR1
REAC	Voltage gated Potassium channels	REAC:R-MMU-1296072	0.00113073	2.94664	36	600	12	8684	KCNA2,KCNA5,KCNA6,KCNAB1,KCNB1,KCNC2,KCNC4,KCND2,KCND3,KCNG1,KCNQ3,KCNQ4
REAC	Signaling by Receptor Tyrosine Kinases	REAC:R-MMU-9006934	0.00249019	2.60377	380	600	50	8684	AXL,CAV1,CDH5,COL1A1,COL1A2,COL23A1,COL3A1,COL4A5,COL5A1,COL5A2,COL5A3,COL6A1,COL6A2,COL6A3,ESR1,FGF1,FGF18,FGF2,FGF7,FGFR1,FLRT2,FLT4,FN1,GRB10,HGF,HSPB1,IGF1,ITGB1,LAMA1,LAMA2,LAMA4,LAMB1,LAMB2,LAMC3,LRIG1,NGF,NOS3,NRP1,NRP2,PDGFD,PDGFRA,PDGFRB,PTPRU,RBFOX2,SHC2,SPRY1,THBS2,THBS3,VEGFB,WASF3
REAC	Crosslinking of collagen fibrils	REAC:R-MMU-2243919	0.0027356	2.56295	17	600	8	8684	COL1A1,COL1A2,COL23A1,COL4A5,LOXL2,LOXL4,PCOLCE,PXDN
REAC	Signaling by PDGF	REAC:R-MMU-186797	0.0029227	2.53422	52	600	14	8684	COL23A1,COL3A1,COL4A5,COL5A1,COL5A2,COL5A3,COL6A1,COL6A2,COL6A3,PDGFD,PDGFRA,PDGFRB,THBS2,THBS3
REAC	Class A/1 (Rhodopsin-like receptors)	REAC:R-MMU-373076	0.00303948	2.5172	300	600	42	8684	ACKR3,ACKR4,ADRA2C,AGTR1A,ANXA1,APLN,APLNR,BDKRB2,C3AR1,C5AR1,CHRM2,CNR1,CX3CR1,CXCL12,EDNRA,EDNRB,F2R,GAL,GALR2,GPBAR1,GPR37,GPR37L1,GPR4,GRPR,NMUR1,NPY1R,NPY2R,NPY4R,NTSR1,OPRK1,OPRL1,P2RY14,P2RY6,PENK,PTGER1,PTGFR,PTGIR,SSTR1,TACR1,TACR2,TACR3,XCR1
REAC	Cell-Cell communication	REAC:R-MMU-1500931	0.00507037	2.29496	84	600	18	8684	CADM1,CADM3,CDH11,CDH13,CDH2,CDH3,CDH5,CDH6,FERMT2,FLNA,FLNC,ITGB1,KIRREL,LIMS2,PARVA,PARVB,SDK1,SDK2
REAC	Axon guidance	REAC:R-MMU-422475	0.00517182	2.28636	256	600	37	8684	ANK1,ARTN,COL23A1,COL3A1,COL4A5,COL5A1,COL5A2,COL5A3,COL6A1,COL6A2,COL6A3,CXCL12,EFNA5,ENAH,EPHA7,FGFR1,GAP43,GDNF,GFRA1,GFRA4,GRB10,ITGA9,ITGB1,MMP2,NRP1,NTN1,PDLIM7,PLXNA4,PLXNB3,SDC2,SEMA3A,SHANK3,SLIT2,SLIT3,TUBB3,TUBB4A,TUBB6
REAC	Nervous system development	REAC:R-MMU-9675108	0.00517182	2.28636	256	600	37	8684	ANK1,ARTN,COL23A1,COL3A1,COL4A5,COL5A1,COL5A2,COL5A3,COL6A1,COL6A2,COL6A3,CXCL12,EFNA5,ENAH,EPHA7,FGFR1,GAP43,GDNF,GFRA1,GFRA4,GRB10,ITGA9,ITGB1,MMP2,NRP1,NTN1,PDLIM7,PLXNA4,PLXNB3,SDC2,SEMA3A,SHANK3,SLIT2,SLIT3,TUBB3,TUBB4A,TUBB6
REAC	Smooth Muscle Contraction	REAC:R-MMU-445355	0.00549195	2.26027	29	600	10	8684	ACTA2,ACTG2,CALD1,CAV3,DYSF,MYL9,MYLK,SORBS3,TPM1,TPM2
REAC	Signal Transduction	REAC:R-MMU-162582	0.00651423	2.18614	2371	600	209	8684	ACKR3,ACKR4,ACVRL1,ADCY1,ADCY5,ADCYAP1,ADCYAP1R1,ADGRE1,ADRA2C,AGTR1A,ALDH1A3,AMOTL1,ANGPT1,ANXA1,APLN,APLNR,ARHGAP20,ARHGAP23,ARHGAP44,ARHGAP6,ARHGEF15,ARHGEF17,ARHGEF9,ARTN,AXL,BDKRB2,C3AR1,C5AR1,CALCRL,CAV1,CAV2,CDC42EP3,CDH5,CHN1,CHRDL1,CHRM2,CLIP3,CLIP4,CNKSR2,CNR1,COL1A1,COL1A2,COL23A1,COL3A1,COL4A5,COL5A1,COL5A2,COL5A3,COL6A1,COL6A2,COL6A3,CX3CR1,CXCL12,DACT1,DGKB,DHH,DKK2,DLG2,DLG4,DZIP1,…
REAC	Signaling by MET	REAC:R-MMU-6806834	0.00786059	2.10455	71	600	16	8684	COL1A1,COL1A2,COL3A1,COL5A1,COL5A2,COL5A3,FN1,HGF,ITGB1,LAMA1,LAMA2,LAMA4,LAMB1,LAMB2,LAMC3,LRIG1
REAC	Cell-extracellular matrix interactions	REAC:R-MMU-446353	0.0113619	1.94455	15	600	7	8684	FERMT2,FLNA,FLNC,ITGB1,LIMS2,PARVA,PARVB
REAC	Hemostasis	REAC:R-MMU-109582	0.0143978	1.8417	561	600	64	8684	ADRA2C,ANGPT1,ATP1B2,ATP2B3,ATP2B4,CAV1,CD109,COL1A1,COL1A2,DGKB,DOCK4,ECM1,EHD2,F13A1,F2R,FLNA,FN1,GATA2,GNAI1,GNB4,GNG7,GNG8,GRB14,HGF,IGF1,ISLR,ITGB1,JAM2,JAM3,KIF26B,KIF5A,MGLL,MRVI1,NOS1,NOS3,P2RX6,PCDH7,PDE1A,PHACTR2,PLAU,PRKAR1B,PRKAR2B,PRKG1,PROS1,PTGIR,SCG3,SDC2,SDC3,SELP,SERPINB8,SERPINE2,SERPING1,SLC8A2,SPARC,TEK,TGFB2,THBD,TIMP3,TRPC6,TUBB3,TUBB4A,TUBB6,VEGFB,ZFPM2
REAC	G alpha (i) signalling events	REAC:R-MMU-418594	0.0225527	1.6468	347	600	44	8684	ACKR3,ADCY1,ADCY5,ADRA2C,ANXA1,APLN,APLNR,BDKRB2,C3AR1,C5AR1,CHRM2,CNR1,CX3CR1,CXCL12,GABBR1,GAL,GALR2,GNAI1,GNAO1,GNB4,GNG7,GNG8,GPC3,GPC6,GPR37,GPR37L1,NMUR1,NPY1R,NPY2R,NPY4R,OPRK1,OPRL1,P2RY14,PDE1A,PENK,PLCB1,PLCB4,PRKAR1B,PRKAR2B,RGS5,RGS6,SDC2,SDC3,SSTR1
REAC	Dopamine Neurotransmitter Release Cycle	REAC:R-MMU-212676	0.0263871	1.57861	22	600	8	8684	APBA1,CPLX1,LIN7B,SLC18A2,SNAP25,SYN1,SYN2,SYT1
REAC	LGI-ADAM interactions	REAC:R-MMU-5682910	0.0474737	1.32355	13	600	6	8684	ADAM11,ADAM22,CACNG4,DLG4,LGI2,LGI4
WP	Focal Adhesion-PI3K-Akt-mTOR-signaling pathway	WP:WP2841	9.20035e-08	7.0362	314	391	60	4470	ANGPT1,CHRM2,COL1A1,COL1A2,COL3A1,COL5A1,COL5A2,COL5A3,COL6A2,EFNA5,EIF4EBP1,EPOR,F2R,FGF1,FGF13,FGF18,FGF2,FGF7,FGFR1,FGFR2,FLT1,FLT4,FN1,GNB4,GNG7,GNG8,HGF,IGF1,IGF1R,IRS1,ITGA11,ITGA7,ITGA8,ITGA9,ITGB1,KDR,LAMA1,LAMA2,LAMA4,LAMB1,LAMB2,LAMC3,NGF,NOS1,NOS3,PDGFD,PDGFRA,PDGFRB,PIK3IP1,PPP2R2B,PPP2R2C,SLC2A4,TEK,THBS2,THBS3,TNC,TNXB,VEGFB,VTN,VWF
WP	Non-odorant GPCRs	WP:WP1396	1.24954e-06	5.90325	264	391	51	4470	ACKR1,ACKR3,ADCYAP1R1,ADGRB2,ADGRE1,ADGRL1,ADGRL3,ADGRL4,ADRA2B,ADRA2C,AGTR1A,APLNR,BDKRB2,C3AR1,C5AR1,CALCRL,CHRM2,CNR1,CX3CR1,EDNRA,EDNRB,F2R,FZD1,FZD2,GABBR1,GALR2,GCGR,GLP2R,GPBAR1,GPRC5B,GRPR,NMUR1,NPY1R,NPY2R,NPY4R,NTSR1,OPRK1,P2RY14,P2RY6,PTGER1,PTGER3,PTGFR,PTGIR,PTH1R,SMO,SSTR1,SSTR4,TACR1,TACR2,TACR3,XCR1
WP	Focal Adhesion	WP:WP85	1.15226e-05	4.93845	182	391	38	4470	CAV1,CAV2,CAV3,COL1A1,COL1A2,COL3A1,COL5A1,COL5A2,COL5A3,COL6A2,FLNA,FLT1,FN1,HGF,IGF1,ITGA11,ITGA7,ITGA8,ITGA9,ITGB1,LAMA1,LAMA2,LAMA4,LAMB1,LAMB2,LAMC3,MYLK,PARVB,PDGFD,PDGFRA,PDGFRB,THBS2,THBS3,TNC,TNXB,VEGFB,VTN,VWF
WP	GDNF/RET signalling axis	WP:WP4820	5.9199e-05	4.22769	23	391	11	4470	BMP4,FAT4,GDNF,GFRA1,GLI3,GREM1,ROBO2,SALL1,SLIT2,SOX17,SPRY1
WP	Peptide GPCRs	WP:WP234	6.52258e-05	4.18558	70	391	20	4470	AGTR1A,BDKRB2,C3AR1,C5AR1,CX3CR1,EDNRA,EDNRB,GALR2,GRPR,NPY1R,NPY2R,NPY4R,NTSR1,OPRK1,OPRL1,SSTR1,SSTR4,TACR1,TACR2,TACR3
WP	Calcium Regulation in the Cardiac Cell	WP:WP553	8.15175e-05	4.08875	144	391	31	4470	ADCY1,ADCY5,ATP1B2,ATP2B3,CACNA1B,CACNA1C,CACNB1,CASQ1,CASQ2,CHRM2,GJA1,GJA5,GJC1,GJC2,GNAI1,GNAO1,GNB4,GNG7,GNG8,KCNB1,KCNJ5,PKIA,PLN,PRKAR1B,PRKAR2B,PRKD1,RGS4,RGS5,RGS6,RYR2,SLC8A1
WP	GPCRs, Class B Secretin-like	WP:WP456	0.00279164	2.55414	22	391	9	4470	ADCYAP1R1,ADGRE1,ADGRL1,ADGRL3,ADGRL4,CALCRL,GCGR,GLP2R,PTH1R
WP	Endochondral Ossification	WP:WP1270	0.00315565	2.50091	62	391	16	4470	ADAMTS1,ADAMTS4,DDR2,FGF18,FGF2,FGFR1,FRZB,GLI3,IGF1,IGF1R,NKX3-2,PLAU,PTH1R,SERPINH1,TGFB2,TIMP3
WP	Prostaglandin Synthesis and Regulation	WP:WP374	0.011131	1.95347	31	391	10	4470	ANXA1,EDNRA,EDNRB,PTGER1,PTGER3,PTGFR,PTGIR,PTGIS,PTGS2,TBXAS1
WP	Myometrial Relaxation and Contraction Pathways	WP:WP385	0.0242333	1.61559	149	391	26	4470	ACKR3,ADCY1,ADCY5,CALD1,CNN1,GJA1,GNB4,GNG7,GNG8,GPR182,IGFBP2,IGFBP3,IGFBP4,IGFBP5,NOS1,NOS3,PKIA,PRKAR1B,PRKAR2B,PRKD1,RAMP2,RGS4,RGS5,RGS6,RYR2,SLC8A1
TF	Factor: GKLF; motif: NNRRGRRNGNSNNN; match class: 1	TF:M07040_1	4.04344e-51	50.3932	8475	1355	799	21859	5730409E04RIK,6330403K07RIK,A4GALT,ABLIM2,ABLIM3,ACKR4,ACVRL1,ADAM11,ADAM22,ADAMTS18,ADAMTS4,ADAMTS7,ADAMTSL1,ADAMTSL4,ADARB1,ADCY5,ADCYAP1,ADGRA2,ADGRB2,ADGRG3,ADGRG6,ADGRL1,AEBP1,AGTR1A,ALDH1A3,ALDH7A1,ANGPTL2,ANK1,ANK2,ANKRD34A,ANKRD63,AOC3,APBB1,APC2,APLN,APLNR,APOD,APOL10B,APOLD1,ARHGAP20,ARHGAP23,ARHGAP6,ARHGEF15,ARHGEF17,ARHGEF25,ARHGEF9,ARMCX1,ARMCX3,ARMCX4,ARSI,ARTN,ASIC2,ASIC4,ASTN1,AST…
TF	Factor: GKLF; motif: NNNRGGNGNGGSN; match class: 1	TF:M07289_1	7.08146e-43	42.1499	11007	1355	933	21859	5730409E04RIK,6330403K07RIK,A4GALT,AASS,AATK,ABCA9,ABCC9,ABCG4,ABLIM3,ACKR3,ACKR4,ACVRL1,ADAM11,ADAMTS1,ADAMTS18,ADAMTS4,ADAMTS7,ADAMTS8,ADAMTSL1,ADAMTSL3,ADAMTSL4,ADARB1,ADCY1,ADCY5,ADCYAP1,ADGRA2,ADGRE1,ADGRG6,ADGRL1,AEBP1,AGTR1A,AHI1,AK4,ALDH1A3,ALDH7A1,ANK1,ANK2,ANKRD34A,ANKRD63,ANO2,AOC3,AP3B2,APBA1,APBB1,APC2,APH1C,APLN,APLNR,APOD,APOL10B,APOLD1,ARHGAP20,ARHGAP23,ARHGAP6,ARHGEF15,ARHGEF17,A…
TF	Factor: GKLF; motif: NNRRGRRNGNSNNN	TF:M07040	9.90475e-43	42.0042	12962	1355	1044	21859	5730409E04RIK,6330403K07RIK,9330182L06RIK,A4GALT,AASS,ABCC9,ABCG4,ABLIM2,ABLIM3,ACKR3,ACKR4,ACTG2,ACVRL1,ADAM11,ADAM22,ADAMTS18,ADAMTS4,ADAMTS7,ADAMTSL1,ADAMTSL3,ADAMTSL4,ADARB1,ADCY5,ADCYAP1,ADGRA2,ADGRB2,ADGRG3,ADGRG6,ADGRL1,ADRA2C,AEBP1,AGTR1A,AHI1,AK4,AKAP6,ALDH1A3,ALDH7A1,AMIGO1,ANGPTL2,ANK1,ANK2,ANKRD34A,ANKRD63,ANXA1,AOC3,APBB1,APC2,APLN,APLNR,APOD,APOL10B,APOLD1,ARHGAP20,ARHGAP23,ARHGAP6,…
TF	Factor: Sp1; motif: GGNGGGGGNGGGGGMGGGGCNGGG	TF:M10375	1.38889e-42	41.8573	10768	1355	918	21859	5730409E04RIK,6330403K07RIK,9330182L06RIK,A4GALT,AASS,AATK,ABCA9,ABCG4,ABLIM2,ACKR3,ACVRL1,ADAM11,ADAMTS1,ADAMTS18,ADAMTS4,ADAMTS7,ADAMTSL3,ADAMTSL4,ADARB1,ADCY1,ADCY5,ADCYAP1,ADGRA2,ADGRB2,ADGRE1,ADGRF5,ADGRG3,ADGRG6,ADGRL1,ADRA2B,ADRA2C,AEBP1,AGTR1A,AHI1,AK4,ALDH1A3,ALDH7A1,AMIGO1,AMOTL1,ANK1,ANKRD34A,ANKRD63,ANXA1,AOAH,AOC3,APBA1,APBB1,APC2,APH1C,APLN,APLNR,APOLD1,ARHGAP20,ARHGAP23,ARHGAP6,ARH…
TF	Factor: CTCF; motif: NAGGGGGCGCNNKNNNN; match class: 1	TF:M08995_1	4.49218e-39	38.3475	9349	1355	821	21859	6330403K07RIK,9330182L06RIK,AASS,ABCG4,ABLIM2,ABLIM3,ADAM11,ADAMTS1,ADAMTS18,ADAMTS4,ADAMTS7,ADAMTS8,ADAMTSL3,ADAMTSL4,ADARB1,ADCY1,ADCY5,ADGRA2,ADGRB2,ADGRG6,ADGRL1,ADRA2B,ADRA2C,AFAP1L2,AHI1,AK4,ALDH1A3,ALDH7A1,AMOTL1,ANK1,ANKRD34A,ANKRD63,AOC3,APBA1,APBB1,APH1C,APLN,ARHGAP20,ARHGAP23,ARHGAP6,ARHGEF15,ARHGEF17,ARHGEF25,ARHGEF9,ARMCX1,ARMCX3,ARMCX4,ARTN,ASIC2,ASPHD2,ASTN1,ASTN2,ATOH8,ATP1B2,ATP2…
TF	Factor: Kaiso; motif: GCMGGGRGCRGS	TF:M03876	1.10831e-37	36.9553	11140	1355	926	21859	9330182L06RIK,A4GALT,A930004D18RIK,ABCA9,ABCC9,ABCG4,ABLIM2,ABLIM3,ACKR1,ACKR3,ACKR4,ACTG2,ACVRL1,ADAM11,ADAM22,ADAMTS1,ADAMTS18,ADAMTS7,ADAMTS8,ADAMTSL3,ADAMTSL4,ADARB1,ADCY1,ADCY5,ADGRA2,ADGRB2,ADGRG3,ADGRG6,ADGRL1,ADGRL4,ADRA2C,AFAP1L2,AHRR,AK4,AKAP12,AKAP6,ALDH1A3,ALDH7A1,AMIGO1,ANGPT1,ANGPTL2,ANKRD63,ANO2,ANTXR1,AOC3,AOX1,AP3B2,APBA1,APBB1,APC2,APLN,APLNR,APOL10B,ARHGAP20,ARHGAP23,ARHGAP44,A…
TF	Factor: Sp1; motif: GGNGGGGGNGGGGGMGGGGCNGGG; match class: 1	TF:M10375_1	9.41538e-37	36.0262	7407	1355	688	21859	5730409E04RIK,6330403K07RIK,9330182L06RIK,AASS,AATK,ABCA9,ABCG4,ACVRL1,ADAM11,ADAMTS1,ADAMTS18,ADAMTS7,ADAMTSL4,ADARB1,ADCY1,ADCY5,ADCYAP1,ADGRA2,ADGRB2,ADGRE1,ADGRG3,ADGRG6,ADGRL1,ADRA2C,AEBP1,AGTR1A,AHI1,AK4,ALDH1A3,ALDH7A1,AMIGO1,ANK1,ANKRD63,ANXA1,AOAH,AOC3,APBA1,APBB1,APH1C,APLN,APOLD1,ARHGAP20,ARHGAP6,ARHGEF15,ARHGEF17,ARHGEF25,ARHGEF9,ARTN,ASIC2,ASTN1,ASTN2,ATOH8,ATP1A2,ATP2B3,ATP2B4,AXL,B…
TF	Factor: BEN; motif: CAGCGRNV	TF:M01240	1.9743e-36	35.7046	16245	1355	1197	21859	5730409E04RIK,6330403K07RIK,9330182L06RIK,9530077C05RIK,A4GALT,AASS,AATK,ABCA8A,ABCC9,ABCG4,ABLIM2,ABLIM3,ACKR1,ACKR3,ACKR4,ACTA2,ACTG2,ACVRL1,ADAM11,ADAM22,ADAMDEC1,ADAMTS1,ADAMTS18,ADAMTS4,ADAMTS7,ADAMTS8,ADAMTSL1,ADAMTSL3,ADAMTSL4,ADARB1,ADCY1,ADCY5,ADCYAP1,ADCYAP1R1,ADGRA2,ADGRB2,ADGRE1,ADGRG3,ADGRG6,ADGRL1,ADGRL3,ADRA2B,ADRA2C,AEBP1,AFAP1L2,AGTR1A,AHI1,AHRR,AK4,ALDH1A3,ALDH7A1,AMIGO1,AMOTL1,…
TF	Factor: GKLF; motif: NNNRGGNGNGGSN	TF:M07289	4.06874e-36	35.3905	15320	1355	1151	21859	5730409E04RIK,6330403K07RIK,9330182L06RIK,A4GALT,AASS,AATK,ABCA8A,ABCA9,ABCC9,ABCG4,ABLIM3,ACKR1,ACKR3,ACKR4,ACVRL1,ADAM11,ADAMTS1,ADAMTS18,ADAMTS4,ADAMTS7,ADAMTS8,ADAMTSL1,ADAMTSL3,ADAMTSL4,ADARB1,ADCY1,ADCY5,ADCYAP1,ADCYAP1R1,ADGRA2,ADGRB2,ADGRE1,ADGRG3,ADGRG6,ADGRL1,ADRA2C,AEBP1,AGTR1A,AHI1,AHRR,AK4,AKAP12,AKAP6,ALDH1A3,ALDH7A1,ANGPTL2,ANK1,ANK2,ANKRD34A,ANKRD63,ANO2,AOC3,AP3B2,APBA1,APBB1,APC…
TF	Factor: BTEB3; motif: BNRNGGGAGGNGT	TF:M01865	1.11457e-34	33.9529	8930	1355	781	21859	5730409E04RIK,9330182L06RIK,A4GALT,ABCG4,ABLIM2,ACKR3,ACKR4,ACTA2,ACVRL1,ADAM11,ADAMTS18,ADAMTS7,ADAMTS8,ADAMTSL3,ADAMTSL4,ADCY1,ADCY5,ADCYAP1,ADGRA2,ADGRE1,ADGRG3,ADGRL1,ADGRL4,ADRA2B,ADRA2C,AEBP1,AGTR1A,AKAP6,ALDH1A3,ALDH7A1,AMIGO1,ANK1,ANKRD34A,APBB1,APC2,APLN,APLNR,APOD,APOL10B,ARHGAP20,ARHGAP23,ARHGEF17,ARHGEF25,ARMCX1,ARSI,ARTN,ASPHD2,ASTN1,ATL1,ATOH8,ATP1A2,ATP2B3,B3GALNT1,B3GNT9,B4GALT2,B…
TF	Factor: LKLF; motif: GGGGTGGKSN	TF:M07261	1.66094e-33	32.7796	9194	1355	794	21859	5730409E04RIK,6330403K07RIK,9330182L06RIK,A4GALT,AASS,AATK,ABCA9,ABLIM3,ACKR3,ACTA2,ACVRL1,ADAM11,ADAMTS1,ADAMTS4,ADAMTS7,ADAMTSL4,ADARB1,ADCY1,ADCY5,ADGRB2,ADGRE1,ADGRL1,ADRA2C,AFAP1L2,AHI1,AHRR,AK4,AKAP12,AKAP6,ALDH1A3,ALDH7A1,AMOTL1,ANK1,ANKRD34A,ANKRD63,ANO2,AOC3,AOX1,APBA1,APBB1,APH1C,APLN,APLNR,APOL10B,APOLD1,ARHGAP20,ARHGAP44,ARHGAP6,ARHGEF17,ARHGEF25,ARHGEF9,ARMCX3,ARMCX4,ARTN,ASIC2,ASIC4…
TF	Factor: Kaiso; motif: GCMGGGRGCRGS; match class: 1	TF:M03876_1	3.0989e-32	31.5088	5838	1355	566	21859	9330182L06RIK,ABCG4,ABLIM2,ACVRL1,ADAM11,ADAM22,ADAMTS1,ADAMTS18,ADAMTS7,ADAMTSL3,ADARB1,ADCY5,ADGRA2,ADGRG6,ADGRL1,ADRA2C,AFAP1L2,AK4,ALDH1A3,ALDH7A1,AMIGO1,ANGPT1,ANGPTL2,ANKRD63,AP3B2,APBA1,APBB1,ARHGAP44,ARHGAP6,ARHGEF15,ARHGEF17,ASIC2,ASPHD2,ASTN1,ASTN2,ATL1,ATP1B2,ATP2B3,ATP2B4,AW551984,B3GALNT1,B3GNT9,B4GALT2,BACE1,BAG2,BCL6B,BEND6,BEX2,BMPER,BNC2,BOC,BRSK1,BRSK2,CACNA1B,CACNA1G,CACNA1H,CA…
TF	Factor: MAZ; motif: GGGGAGGG	TF:M00649	4.6104e-32	31.3363	8423	1355	740	21859	5730409E04RIK,6330403K07RIK,A4GALT,AASS,AATK,ABCA8A,ABCC9,ABCG4,ACVRL1,ADAM11,ADAM22,ADAMTS1,ADAMTS18,ADAMTS4,ADAMTS7,ADAMTS8,ADAMTSL4,ADARB1,ADCY5,ADGRE1,ADGRG3,ADGRG6,ADGRL1,ADRA2C,AEBP1,AKAP6,ALDH1A3,ALDH7A1,ANK1,ANK2,ANO2,AOC3,AP3B2,APBB1,APC2,APH1C,APOD,APOLD1,ARHGAP20,ARHGAP23,ARHGAP6,ARHGEF17,ARHGEF25,ARHGEF9,ARMCX3,ARMCX4,ARSI,ART3,ARTN,ASIC4,ASTN1,ASTN2,ATOH8,ATP1A2,ATP1B2,ATP2B3,ATP2B4,…
TF	Factor: Pax-4; motif: NNNNNYCACCCB; match class: 1	TF:M00378_1	8.43041e-31	30.0742	14474	1355	1093	21859	5730409E04RIK,6330403K07RIK,9330182L06RIK,9530077C05RIK,A4GALT,A930004D18RIK,AASS,AATK,ABCA9,ABCC9,ABCG4,ABLIM2,ABLIM3,ACKR3,ACTA2,ACVRL1,ADAM11,ADAM22,ADAMTS1,ADAMTS18,ADAMTS4,ADAMTS7,ADAMTS8,ADAMTSL1,ADAMTSL3,ADAMTSL4,ADARB1,ADCY1,ADCY5,ADCYAP1R1,ADGRA2,ADGRB2,ADGRE1,ADGRG6,ADGRL1,ADRA2B,ADRA2C,AEBP1,AFAP1L2,AGTR1A,AHI1,AHRR,AK4,AKAP12,ALDH1A3,ALDH7A1,AMIGO1,AMOTL1,ANGPTL2,ANK1,ANK2,ANKRD34A,AN…
TF	Factor: MOVO-B; motif: GNGGGGG	TF:M01104	1.0618e-30	29.974	7637	1355	684	21859	6330403K07RIK,9330182L06RIK,A4GALT,AASS,ABCG4,ABLIM3,ADAM11,ADAM22,ADAMTS18,ADAMTS4,ADAMTS7,ADAMTSL3,ADAMTSL4,ADCY1,ADCY5,ADGRA2,ADGRG6,ADGRL1,AEBP1,AFAP1L2,AHI1,AK4,ALDH1A3,ALDH7A1,AMIGO1,ANKRD34A,ANKRD63,AOC3,AP3B2,APBA1,APBB1,APH1C,APLN,ARHGAP23,ARHGAP6,ARHGEF17,ARHGEF25,ARMCX3,ARTN,ASIC2,ASTN1,ASTN2,ATL1,ATP1B2,ATP2B3,ATP2B4,AXL,B3GNT9,B4GALT2,BACE1,BAG2,BCL6B,BDKRB2,BEAN1,BEND6,BEX2,BMPER,BN…
TF	Factor: BEN; motif: CAGCGRNV; match class: 1	TF:M01240_1	1.34685e-30	29.8707	11990	1355	954	21859	5730409E04RIK,6330403K07RIK,9530077C05RIK,A4GALT,AASS,AATK,ABCC9,ABCG4,ABLIM2,ABLIM3,ACKR3,ACKR4,ACTA2,ADAM11,ADAM22,ADAMTS1,ADAMTS18,ADAMTS7,ADAMTS8,ADAMTSL1,ADAMTSL3,ADAMTSL4,ADARB1,ADCY1,ADCY5,ADCYAP1,ADCYAP1R1,ADGRA2,ADGRB2,ADGRG3,ADGRG6,ADGRL1,ADRA2B,ADRA2C,AEBP1,AFAP1L2,AGTR1A,AHI1,AHRR,AK4,ALDH1A3,ALDH7A1,AMIGO1,AMOTL1,ANGPTL1,ANK1,ANK2,ANKRD34A,ANKRD63,ANO2,ANTXR1,AOX1,AP3B2,APBA1,APBB1,A…
TF	Factor: KLF; motif: GGGNGGGG	TF:M07461	1.57715e-30	29.8021	8502	1355	740	21859	5730409E04RIK,6330403K07RIK,9330182L06RIK,AASS,AATK,ABCA9,ABCC9,ABCG4,ABLIM3,ACKR3,ACVRL1,ADAM11,ADAMTS1,ADAMTS18,ADAMTS4,ADAMTS7,ADAMTSL1,ADAMTSL4,ADCY5,ADGRF5,ADGRG6,ADGRL1,ADRA2B,ADRA2C,AHI1,AHRR,AK4,AKAP12,ALDH1A3,ALDH7A1,AMOTL1,ANKRD34A,ANKRD63,ANO2,ANTXR1,AOC3,AOX1,APBA1,APBB1,APLN,APLNR,APOL10B,APOLD1,ARHGAP20,ARHGAP23,ARHGAP44,ARHGAP6,ARHGEF15,ARHGEF17,ARHGEF25,ARHGEF9,ARMCX4,ARTN,ASIC2,A…
TF	Factor: ZF5; motif: GSGCGCGR	TF:M00716	1.68358e-30	29.7738	14831	1355	1111	21859	5730409E04RIK,6330403K07RIK,9330182L06RIK,A4GALT,AASS,AATK,ABCC9,ABCG4,ABLIM2,ABLIM3,ACKR1,ACKR3,ACKR4,ACVRL1,ADAM11,ADAM22,ADAMTS1,ADAMTS18,ADAMTS4,ADAMTS7,ADAMTS8,ADAMTSL1,ADAMTSL3,ADAMTSL4,ADARB1,ADCY1,ADCY5,ADCYAP1,ADCYAP1R1,ADGRA2,ADGRB2,ADGRG3,ADGRG6,ADGRL1,ADGRL4,ADRA2B,ADRA2C,AEBP1,AFAP1L2,AGTR1A,AHI1,AHRR,AK4,AKAP6,ALDH1A3,ALDH7A1,AMIGO1,AMOTL1,ANGPT1,ANGPTL1,ANGPTL2,ANK1,ANK2,ANKRD34A,A…
TF	Factor: CTCF; motif: NAGGGGGCGCNNKNNNN	TF:M08995	3.44461e-30	29.4629	14320	1355	1083	21859	6330403K07RIK,9330182L06RIK,A4GALT,A930004D18RIK,AASS,ABCA8A,ABCA9,ABCC9,ABCG4,ABLIM2,ABLIM3,ACKR4,ACTG2,ACVRL1,ADAM11,ADAM22,ADAMTS1,ADAMTS18,ADAMTS4,ADAMTS7,ADAMTS8,ADAMTSL3,ADAMTSL4,ADARB1,ADCY1,ADCY5,ADCYAP1,ADGRA2,ADGRB2,ADGRE1,ADGRG6,ADGRL1,ADRA2B,ADRA2C,AEBP1,AFAP1L2,AHI1,AK4,ALDH1A3,ALDH7A1,AMIGO1,AMOTL1,ANGPT1,ANGPTL1,ANGPTL2,ANK1,ANK2,ANKRD34A,ANKRD63,ANO2,AOC3,APBA1,APBB1,APC2,APH1C,AP…
TF	Factor: WT1; motif: NNGGGNGGGSGN	TF:M07436	2.00935e-29	28.6969	7491	1355	670	21859	5730409E04RIK,6330403K07RIK,A4GALT,AASS,ABCA9,ABCC9,ABCG4,ACKR3,ACKR4,ACVRL1,ADAM11,ADAMTS1,ADAMTS4,ADAMTS7,ADAMTS8,ADAMTSL4,ADCY5,ADCYAP1,ADGRA2,ADGRG3,ADGRG6,ADGRL1,AHI1,AHRR,AK4,ALDH1A3,ANK2,ANKRD34A,ANO2,AOC3,APBB1,APC2,APH1C,APLN,APOLD1,ARHGAP20,ARHGAP6,ARHGEF15,ARHGEF17,ARHGEF25,ARMCX4,ARTN,ASIC2,ASTN1,ATOH8,ATP2B3,ATP2B4,AW551984,AXL,B3GALNT1,B4GALT2,BAG2,BCL6B,BEND6,BGN,BMPER,BNC2,BOC,BRS…
TF	Factor: CKROX; motif: SCCCTCCCC	TF:M01175	4.11583e-29	28.3855	6341	1355	591	21859	6330403K07RIK,A4GALT,AASS,AATK,ABCA8A,ACVRL1,ADAMTS1,ADAMTS18,ADAMTS4,ADAMTS7,ADAMTS8,ADAMTSL4,ADARB1,ADCY5,ADGRE1,ADGRG3,ADGRG6,ADGRL1,ADRA2C,AKAP6,ALDH1A3,ALDH7A1,ANK1,ANK2,ANO2,APBB1,APC2,APH1C,APOD,APOLD1,ARHGAP20,ARHGAP23,ARHGAP6,ARHGEF17,ARHGEF25,ARMCX3,ARMCX4,ART3,ARTN,ASIC4,ASTN1,ATP1A2,ATP1B2,ATP2B3,ATP2B4,AXL,B3GNT9,B4GALT2,BAG2,BBS1,BBS7,BEAN1,BGN,BNC2,BOC,BRSK1,C1QTNF9,C1RA,CACNA1G,CA…
TF	Factor: ZBP89; motif: CCCCKCCCCCNN	TF:M07397	7.01783e-29	28.1538	8111	1355	709	21859	6330403K07RIK,A4GALT,AASS,ABCA9,ABCG4,ACKR4,ADAM11,ADAMTS1,ADAMTS18,ADAMTS7,ADAMTSL4,ADARB1,ADCY5,ADCYAP1,ADGRA2,ADGRB2,ADGRE1,ADGRG3,ADGRG6,ADGRL1,AEBP1,AHI1,AK4,AKAP6,ALDH1A3,ALDH7A1,AMIGO1,ANK2,ANKRD34A,ANKRD63,ANO2,AOC3,AP3B2,APBB1,APC2,APH1C,APLN,APLNR,APOD,APOLD1,ARHGAP20,ARHGAP23,ARHGAP6,ARHGEF15,ARHGEF17,ARHGEF25,ARHGEF9,ARMCX4,ARTN,ASIC2,ASPHD2,ASTN1,ATOH8,ATP2B3,ATP2B4,AXL,B3GALNT1,B3GN…
TF	Factor: ZF5; motif: GSGCGCGR; match class: 1	TF:M00716_1	1.81437e-28	27.7413	12041	1355	950	21859	5730409E04RIK,6330403K07RIK,9330182L06RIK,A4GALT,ABCC9,ABCG4,ABLIM2,ABLIM3,ACKR3,ADAM11,ADAM22,ADAMTS1,ADAMTS18,ADAMTS4,ADAMTS7,ADAMTS8,ADAMTSL1,ADAMTSL3,ADAMTSL4,ADARB1,ADCY1,ADCY5,ADGRA2,ADGRB2,ADGRG6,ADGRL1,ADRA2B,ADRA2C,AEBP1,AFAP1L2,AHI1,AK4,AKAP6,ALDH1A3,ALDH7A1,AMIGO1,AMOTL1,ANK2,ANKRD34A,ANKRD63,ANO2,ANTXR1,AOC3,AOX1,AP3B2,APBA1,APBB1,APH1C,APLN,ARHGAP20,ARHGAP23,ARHGAP44,ARHGAP6,ARHGEF15…
TF	Factor: WT1; motif: SMCNCCNSC	TF:M01118	5.2393e-27	26.2807	8135	1355	704	21859	5730409E04RIK,6330403K07RIK,A4GALT,AASS,ABCA8A,ABCC9,ABLIM2,ABLIM3,ACKR4,ACVRL1,ADAM11,ADAMTS1,ADAMTS18,ADAMTS4,ADAMTS7,ADAMTSL1,ADAMTSL3,ADAMTSL4,ADCY1,ADCY5,ADCYAP1,ADGRA2,ADGRE1,ADGRG3,ADGRG6,ADGRL1,AEBP1,AKAP6,ALDH1A3,ALDH7A1,ANK1,ANK2,ANKRD34A,AOC3,AP3B2,APBB1,APC2,APH1C,APLN,APOD,APOLD1,ARHGAP20,ARHGAP23,ARHGAP6,ARHGEF15,ARHGEF17,ARHGEF25,ARHGEF9,ARMCX1,ARMCX3,ARMCX4,ARSI,ARTN,ASIC2,ASPN,AS…
TF	Factor: LKLF; motif: GGGGTGGKSN; match class: 1	TF:M07261_1	8.69416e-27	26.0608	3780	1355	398	21859	5730409E04RIK,A4GALT,AASS,AATK,ABCA9,ABLIM3,ACVRL1,ADAM11,ADAMTS1,ADAMTS7,ADAMTSL4,ADCY5,ADGRL1,AHI1,AK4,ALDH1A3,ALDH7A1,ANKRD34A,ANKRD63,AOC3,AOX1,APLNR,APOLD1,ARHGAP20,ARHGEF17,ARHGEF25,ARMCX4,ARTN,ATOH8,ATP2B3,ATP2B4,B3GALNT1,BCL6B,BEX2,BGN,BMPER,CACNA1G,CACNA1H,CACNA2D3,CACNB1,CADM3,CADPS,CALB2,CAR11,CAR14,CASKIN1,CASQ2,CAV1,CAV2,CCDC136,CCDC60,CCM2L,CD300LG,CD99L2,CDC42EP3,CDH2,CDR2L,CERS1,C…
TF	Factor: SP1:SP3; motif: CCSCCCCCYCC	TF:M01219	1.58199e-26	25.8008	6689	1355	606	21859	5730409E04RIK,6330403K07RIK,ABCG4,ABLIM3,ACKR4,ADAM11,ADAM22,ADAMTS18,ADAMTS7,ADAMTSL4,ADARB1,ADCY5,ADCYAP1,ADGRA2,ADGRB2,ADGRG6,ADGRL1,AK4,ALDH1A3,ALDH7A1,AMIGO1,ANGPT1,ANK2,ANKRD34A,ANKRD63,APBB1,APH1C,APLN,ARHGAP20,ARHGAP6,ARHGEF15,ARHGEF17,ARMCX3,ARMCX4,ASIC2,ASTN1,ATOH8,ATP1B2,ATP2B4,AW551984,AXL,BACE1,BAG2,BCL6B,BEX2,BMPER,BNC2,BOC,BRSK1,BRSK2,C1QTNF9,C3AR1,CACNA1B,CACNA1H,CACNA2D3,CACNB1,C…
TF	Factor: E2F-1; motif: GNGGGCGGGRMN	TF:M10209	2.42985e-26	25.6144	14241	1355	1067	21859	5730409E04RIK,9330182L06RIK,9530077C05RIK,A4GALT,AASS,AATK,ABCA9,ABCC9,ABCG4,ABLIM2,ABLIM3,ACKR3,ACTG2,ACVRL1,ADAM11,ADAM22,ADAMTS18,ADAMTS4,ADAMTS7,ADAMTS8,ADAMTSL3,ADAMTSL4,ADARB1,ADCY1,ADCY5,ADGRA2,ADGRB2,ADGRG3,ADGRG6,ADGRL1,ADRA2B,ADRA2C,AEBP1,AFAP1L2,AGTR1A,AHI1,AHRR,AK4,AKAP12,AKAP6,ALDH1A3,ALDH7A1,AMIGO1,AMOTL1,ANGPT1,ANGPTL2,ANK1,ANKRD63,ANO2,ANTXR1,AOC3,AOX1,AP3B2,APBA1,APBB1,APC2,APH1C…
TF	Factor: ZF5; motif: NRNGNGCGCGCWN	TF:M00333	4.46567e-25	24.3501	14481	1355	1076	21859	5730409E04RIK,6330403K07RIK,9330182L06RIK,9530077C05RIK,A4GALT,ABCA9,ABCG4,ABLIM2,ABLIM3,ACKR3,ADAM11,ADAM22,ADAMTS1,ADAMTS18,ADAMTS4,ADAMTS7,ADAMTS8,ADAMTSL1,ADAMTSL3,ADAMTSL4,ADARB1,ADCY1,ADCY5,ADGRA2,ADGRB2,ADGRE1,ADGRG6,ADGRL1,ADGRL4,ADRA2B,ADRA2C,AEBP1,AFAP1L2,AGTR1A,AHI1,AHRR,AK4,ALDH1A3,ALDH7A1,AMIGO1,AMOTL1,ANKRD34A,ANKRD63,ANO2,ANTXR1,AOAH,AP3B2,APBA1,APBB1,APC2,APH1C,APLN,APLNR,APOD,APO…
TF	Factor: WT1; motif: NGCGGGGGGGTSMMCYN	TF:M05599	1.14976e-24	23.9394	5302	1355	503	21859	9330182L06RIK,ABLIM2,ABLIM3,ACKR4,ADAM11,ADAMTS18,ADAMTS7,ADAMTSL1,ADAMTSL4,ADCY1,ADCY5,ADGRA2,ADGRG3,ADRA2C,AHI1,ALDH7A1,AMIGO1,ANKRD34A,APBA1,APBB1,APLN,ARHGAP20,ARHGEF15,ARHGEF25,ARMCX4,ARSI,ASIC2,ASPN,ASTN2,ATL1,ATP2B3,AXL,B3GALNT1,B4GALT2,BAG2,BEAN1,BEND6,BEX2,BGN,BNC2,BRSK1,BRSK2,BVES,C1RA,C3AR1,CACNA1B,CACNA1G,CACNA1H,CACNA2D3,CACNB1,CACNB2,CACNG4,CADM1,CADM3,CADPS,CALY,CASKIN1,CASQ1,CASQ2…
TF	Factor: WT1; motif: CGCCCCCNCN	TF:M02036	2.78901e-24	23.5545	7510	1355	653	21859	9330182L06RIK,ABCC9,ABCG4,ABLIM2,ABLIM3,ACKR4,ADAM11,ADAMTS1,ADAMTS18,ADAMTS7,ADAMTS8,ADAMTSL3,ADARB1,ADCY1,ADCY5,ADGRA2,ADGRG6,ADGRL1,ADRA2C,AFAP1L2,AHI1,AK4,ALDH1A3,ALDH7A1,AMIGO1,ANKRD34A,ANKRD63,AOC3,APBA1,APBB1,APH1C,APLN,ARHGAP20,ARHGAP23,ARHGEF15,ARHGEF17,ARSI,ARTN,ASIC2,ASIC4,ASPHD2,ASTN2,ATL1,ATP1B2,ATP2B3,ATP2B4,AXL,B4GALT2,BACE1,BAG2,BCL6B,BEND6,BEX2,BMPER,BNC2,BRSK1,BRSK2,BVES,CACNA1B…
TF	Factor: BCL6B; motif: NNNNCCGCCCCWNNNN	TF:M02844	2.95067e-24	23.5301	13676	1355	1029	21859	5730409E04RIK,6330403K07RIK,9330182L06RIK,9530077C05RIK,A4GALT,AASS,AATK,ABCC9,ABCG4,ABLIM2,ABLIM3,ACKR3,ACTA2,ACVRL1,ADAM11,ADAM22,ADAMDEC1,ADAMTS1,ADAMTS18,ADAMTS4,ADAMTS7,ADAMTS8,ADAMTSL3,ADAMTSL4,ADARB1,ADCY1,ADCY5,ADCYAP1R1,ADGRA2,ADGRB2,ADGRG3,ADGRG6,ADGRL1,ADRA2B,ADRA2C,AEBP1,AFAP1L2,AGTR1A,AHI1,AHRR,AK4,AKAP12,AKAP6,ALDH1A3,ALDH7A1,AMIGO1,AMOTL1,ANGPT1,ANGPTL2,ANK1,ANKRD34A,ANKRD63,ANO2,A…
TF	Factor: EGR; motif: CGCCCCCGCNN	TF:M08878	3.99273e-24	23.3987	5826	1355	538	21859	9330182L06RIK,ABCG4,ABLIM3,ACKR4,ADAM11,ADAMTS18,ADAMTS7,ADARB1,ADCY1,ADCY5,ADGRA2,ADGRG6,ADGRL1,ADRA2C,AFAP1L2,AHI1,AK4,AKAP12,ALDH1A3,ALDH7A1,AMIGO1,ANKRD34A,APBA1,APBB1,APH1C,APLN,ARHGAP20,ARHGAP23,ARTN,ASIC4,ASPHD2,ASTN2,ATP2B3,ATP2B4,AXL,B4GALT2,BACE1,BAG2,BCL6B,BEX2,BMPER,BRSK1,BRSK2,BVES,C3AR1,CACNA1B,CACNA1G,CACNA1H,CACNA2D3,CACNG4,CADM1,CADM3,CALB2,CAP2,CAR11,CASKIN1,CD200,CD99L2,CDH13,C…
TF	Factor: KLF; motif: GGGNGGGG; match class: 1	TF:M07461_1	4.3935e-24	23.3572	3304	1355	353	21859	5730409E04RIK,AATK,ABCA9,ACKR3,ACVRL1,ADAM11,ADAMTS1,ADAMTS4,ADAMTSL4,ADCY5,ADGRL1,AHI1,AHRR,AK4,ALDH1A3,ALDH7A1,ANKRD34A,AOC3,APBA1,APBB1,APLNR,APOLD1,ARHGAP20,ARHGEF17,ARHGEF25,ARMCX4,ARTN,ASIC2,ASIC4,ATOH8,ATP2B4,AXL,B3GALNT1,B4GALT2,BEX2,BGN,BNC2,BRSK2,CACNA1H,CACNA2D3,CACNB1,CALB2,CAR11,CASKIN1,CASQ1,CASQ2,CAV1,CAV2,CCDC136,CCDC60,CCM2L,CD248,CD300LG,CD99L2,CDH2,CKM,CLIP3,CLMP,CNGA3,COL12A1,…
TF	Factor: Egr-1; motif: GCGGGGGCGG	TF:M07354	4.87705e-24	23.3118	5931	1355	545	21859	9330182L06RIK,ABCG4,ABLIM3,ACKR4,ADAM11,ADAMTS18,ADAMTS7,ADAMTSL3,ADARB1,ADCY1,ADCY5,ADGRG6,ADGRL1,ADRA2C,AFAP1L2,AHI1,AK4,AKAP12,ALDH1A3,ALDH7A1,AMIGO1,ANKRD34A,APBA1,APBB1,APH1C,APLN,ARHGAP20,ARHGEF17,ARSI,ARTN,ASIC4,ASPHD2,ASTN2,ATP2B3,ATP2B4,AXL,B3GNT9,B4GALT2,BACE1,BAG2,BCL6B,BEX2,BMPER,BNC2,BRSK1,BRSK2,BVES,CACNA1B,CACNA1G,CACNA1H,CACNG4,CADM3,CALB2,CAP2,CAR11,CASKIN1,CD200,CD248,CD99L2,CDH…
TF	Factor: FOXN4; motif: NNWANNCGWMCGCGTCNNNNMT	TF:M04662	5.07149e-24	23.2949	16023	1355	1154	21859	5730409E04RIK,6330403K07RIK,9330182L06RIK,9530077C05RIK,A4GALT,AASS,AATK,ABCA9,ABCC9,ABCG4,ABLIM2,ABLIM3,ACKR3,ACTA2,ADAM11,ADAM22,ADAMTS1,ADAMTS18,ADAMTS4,ADAMTS7,ADAMTS8,ADAMTSL1,ADAMTSL3,ADAMTSL4,ADARB1,ADCY1,ADCY5,ADCYAP1,ADCYAP1R1,ADGRA2,ADGRF5,ADGRG6,ADGRL1,ADGRL3,ADGRL4,ADRA2B,ADRA2C,AEBP1,AFAP1L2,AHI1,AHRR,AK4,AKAP6,ALDH1A3,ALDH7A1,AMIGO1,AMOTL1,ANGPT1,ANK1,ANK2,ANKRD34A,ANKRD63,ANO2,ANTX…
TF	Factor: Pax-4; motif: NNNNNYCACCCB	TF:M00378	1.47198e-22	21.8321	18735	1355	1279	21859	5730409E04RIK,6330403K07RIK,9330159F19RIK,9330182L06RIK,9530077C05RIK,A4GALT,A930004D18RIK,AASS,AATK,ABCA9,ABCC9,ABCG4,ABLIM2,ABLIM3,ACKR1,ACKR3,ACTA2,ACTG2,ACVRL1,ADAM11,ADAM22,ADAMTS1,ADAMTS18,ADAMTS4,ADAMTS7,ADAMTS8,ADAMTSL1,ADAMTSL3,ADAMTSL4,ADARB1,ADCY1,ADCY5,ADCYAP1,ADCYAP1R1,ADGRA2,ADGRB2,ADGRE1,ADGRF5,ADGRG6,ADGRL1,ADGRL4,ADRA2B,ADRA2C,AEBP1,AFAP1L2,AGTR1A,AHI1,AHRR,AK4,AKAP12,AKAP6,ALDH1…
TF	Factor: MOVO-B; motif: GNGGGGG; match class: 1	TF:M01104_1	1.80365e-22	21.7438	3266	1355	345	21859	A4GALT,ABCG4,ADAM11,ADAM22,ADAMTS7,ADAMTSL4,ADCY5,ADGRA2,ADGRG6,ADGRL1,AEBP1,AK4,ANKRD63,APBA1,APBB1,APLN,ARHGEF25,ASIC2,ATP1B2,ATP2B3,AXL,B4GALT2,BCL6B,BEND6,BEX2,BMPER,BNC2,BOC,BRSK1,BRSK2,BVES,CACNA1B,CACNA1G,CACNA1H,CACNB1,CADM3,CASKIN1,CAV1,CCDC141,CD109,CD200,CD99L2,CDH13,CDH2,CDH3,CDH6,CDS2,CFL2,CHRM2,CLIP3,CLSTN2,COL12A1,COL23A1,COL9A2,CPLX1,CRIP2,CRTAC1,CSDC2,CYGB,CYP7B1,CYS1,DCHS1,DENND…
TF	Factor: LKLF; motif: CNCCACCCS	TF:M08819	2.71814e-22	21.5657	5807	1355	530	21859	5730409E04RIK,9330182L06RIK,AASS,AATK,ABCA9,ABLIM3,ACKR3,ACVRL1,ADAM11,ADAMTS1,ADAMTS4,ADAMTSL4,ADCY5,ADGRL1,ADRA2C,AHI1,AHRR,AK4,AKAP12,ALDH1A3,ALDH7A1,AMOTL1,ANKRD34A,ANKRD63,ANO2,AOC3,AOX1,APBA1,APBB1,APLN,APLNR,APOLD1,ARHGAP20,ARHGAP44,ARHGEF17,ARHGEF25,ARHGEF9,ARMCX4,ARTN,ASIC2,ASTN1,ATOH8,ATP2B3,ATP2B4,AXL,B3GALNT1,BC034090,BEX2,BGN,BMPER,BNC2,BOC,C1RA,C1S1,CACNA1G,CACNA1H,CACNA2D3,CACNB1,C…
TF	Factor: LRF; motif: GGGGKYNNB	TF:M01100	4.31853e-22	21.3647	5065	1355	477	21859	6330403K07RIK,ABLIM3,ADAMTS1,ADAMTS18,ADAMTSL3,ADCY1,ADCY5,ADGRA2,ADGRL1,ADRA2C,AFAP1L2,AHRR,ANGPTL2,ANKRD34A,ANKRD63,AOC3,APBA1,APC2,APOL7C,ARHGAP23,ARHGEF15,ARHGEF17,ARHGEF25,ARHGEF9,ARMCX4,ARTN,ASIC2,ASIC4,ASTN2,ATP10A,ATP1B2,B4GALT2,BEND6,BEX2,BMPER,BNC2,BRSK1,BRSK2,CACNA1G,CACNA1H,CACNA2D3,CACNG4,CADM3,CADPS,CALB2,CAR11,CASKIN1,CBLN2,CCBE1,CCDC141,CCDC65,CCM2L,CD200,CDH11,CDH13,CDH3,CDH5,CDR…
TF	Factor: MAZ; motif: NKGGGAGGGGRGGR	TF:M02023	6.36902e-22	21.1959	7966	1355	674	21859	5730409E04RIK,6330403K07RIK,AASS,AATK,ABCG4,ABLIM2,ACKR3,ACKR4,ACVRL1,ADAM11,ADAMTS18,ADAMTSL4,ADCY5,ADCYAP1,ADGRA2,ADGRG3,ADGRG6,ADGRL1,ADRA2B,ADRA2C,AGTR1A,AK4,AKAP12,AKAP6,ALDH7A1,AMOTL1,ANK1,ANKRD34A,AOC3,APBA1,APBB1,APLN,APLNR,APOD,APOL10B,APOLD1,ARHGAP20,ARHGAP23,ARHGAP6,ARHGEF15,ARHGEF17,ARHGEF25,ARHGEF9,ARMCX4,ARSI,ARTN,ASIC2,ASTN1,ATP1A2,ATP2B4,AXL,B3GALNT1,B3GNT9,BACE1,BAG2,BBS7,BC03409…
TF	Factor: AP2; motif: GCCYGSGGSN	TF:M08867	2.21111e-21	20.6554	7255	1355	625	21859	ABCC9,ABLIM2,ABLIM3,ADAM11,ADAM22,ADAMTS1,ADAMTS4,ADAMTS8,ADAMTSL3,ADAMTSL4,ADARB1,ADCY1,ADCY5,ADGRA2,ADGRB2,ADGRG6,ADGRL1,ADRA2B,ADRA2C,AK4,ALDH1A3,ANGPTL2,ANKRD34A,ANKRD63,ANO2,ANXA1,APBB1,APH1C,APLN,APOLD1,ARHGAP23,ARHGAP44,ARHGAP6,ARHGEF15,ARHGEF17,ARHGEF25,ARMCX4,ARSI,ASIC2,ASIC4,ASTN2,ATL1,ATOH8,ATP1A2,ATP1B2,ATP2B3,AXL,B3GALNT1,B4GALT2,BAG2,BCL6B,BEAN1,BEND6,BGN,BNC2,BOC,BRSK1,BRSK2,BVES,C…
TF	Factor: BCL6B; motif: NNNNCCGCCCCWNNNN; match class: 1	TF:M02844_1	5.15041e-21	20.2882	8515	1355	706	21859	5730409E04RIK,6330403K07RIK,9330182L06RIK,AATK,ABCG4,ABLIM2,ABLIM3,ACVRL1,ADAM11,ADAMTS1,ADAMTS18,ADAMTS7,ADAMTSL3,ADAMTSL4,ADARB1,ADCY1,ADCY5,ADGRA2,ADGRG3,ADGRG6,ADGRL1,ADRA2B,ADRA2C,AEBP1,AGTR1A,AHRR,AK4,ALDH1A3,ALDH7A1,AMOTL1,ANGPTL2,ANK1,ANKRD63,ANTXR1,AP3B2,APBA1,APBB1,APC2,APH1C,APLN,APLNR,ARHGAP20,ARHGAP23,ARHGEF17,ARHGEF25,ARMCX1,ARMCX4,ARSI,ARTN,ASIC2,ASTN2,ATP1A2,ATP1B2,ATP2B3,ATP2B4,A…
TF	Factor: AP-2alpha; motif: NGCCYSNNGSN	TF:M01857	5.39971e-21	20.2676	6182	1355	551	21859	ABCC9,ABLIM2,ABLIM3,ACKR3,ADAM11,ADAM22,ADAMTS1,ADAMTS8,ADCY1,ADCY5,ADGRA2,ADGRB2,ADGRL1,ADRA2B,ADRA2C,AEBP1,AFAP1L2,AHI1,ALDH1A3,ALDH7A1,ANKRD63,AOC3,AOX1,APBB1,APLN,ARHGAP23,ARHGAP44,ARHGEF17,ARHGEF25,ARMCX4,ARSI,ASIC2,ASTN1,ASTN2,ATL1,ATOH8,ATP1B2,ATP2B3,B3GALNT1,B4GALT2,BCL6B,BEAN1,BEND6,BMPER,BOC,BRSK1,BRSK2,BVES,CACNA1G,CACNA1H,CACNA2D3,CACNB1,CACNG4,CADM1,CADM3,CALB2,CAR11,CASKIN1,CAV1,CAV…
TF	Factor: SP1; motif: GGGGYGGGGNS	TF:M01303	6.10504e-21	20.2143	7146	1355	616	21859	5730409E04RIK,9330182L06RIK,AASS,ABCA9,ABCG4,ABLIM2,ABLIM3,ACVRL1,ADAM11,ADAMTS1,ADAMTS18,ADAMTS7,ADAMTSL4,ADARB1,ADCY5,ADGRA2,ADGRL1,ADRA2C,AEBP1,AGTR1A,AK4,AKAP12,ALDH1A3,ALDH7A1,AMIGO1,AMOTL1,ANKRD34A,ANO2,AOC3,APBB1,APH1C,APLN,APLNR,APOLD1,ARHGEF17,ARHGEF25,ARHGEF9,ARMCX1,ARTN,ASIC2,ATOH8,ATP1B2,ATP2B4,AXL,B3GALNT1,BC034090,BCL6B,BEAN1,BEX2,BGN,BMPER,BOC,BRSK1,BRSK2,C1RA,CACNA1B,CACNA1G,CACNA…
TF	Factor: E2F; motif: GGCGSG	TF:M00803	6.53874e-21	20.1845	10398	1355	824	21859	9330182L06RIK,9530077C05RIK,A4GALT,AASS,ABCC9,ABCG4,ABLIM2,ABLIM3,ACKR3,ACKR4,ADAM11,ADAM22,ADAMTS1,ADAMTS18,ADAMTS4,ADAMTS7,ADAMTS8,ADAMTSL3,ADAMTSL4,ADARB1,ADCY1,ADCY5,ADGRA2,ADGRB2,ADGRG6,ADGRL1,ADGRL4,ADRA2B,ADRA2C,AEBP1,AFAP1L2,AHI1,AHRR,AK4,ALDH1A3,ALDH7A1,AMIGO1,AMOTL1,ANK1,ANKRD63,ANTXR1,AP3B2,APBA1,APBB1,APC2,APLN,ARHGAP20,ARHGAP23,ARHGAP44,ARHGAP6,ARHGEF17,ARHGEF25,ARMCX4,ASIC2,ASTN2,AT…
TF	Factor: E2F-3; motif: GGCGGGN	TF:M02089	9.27621e-21	20.0326	11280	1355	877	21859	5730409E04RIK,9330182L06RIK,A4GALT,AASS,AATK,ABCC9,ABCG4,ABLIM2,ABLIM3,ACVRL1,ADAM11,ADAM22,ADAMTS18,ADAMTS4,ADAMTS7,ADAMTS8,ADAMTSL3,ADAMTSL4,ADARB1,ADCY1,ADCY5,ADGRA2,ADGRB2,ADGRG3,ADGRG6,ADGRL1,ADRA2B,ADRA2C,AEBP1,AFAP1L2,AGTR1A,AHI1,AHRR,AK4,AKAP12,ALDH1A3,ALDH7A1,AMIGO1,AMOTL1,ANGPTL2,ANKRD63,AOC3,AOX1,AP3B2,APBA1,APBB1,APC2,APH1C,APLN,APOLD1,ARHGAP20,ARHGAP23,ARHGAP6,ARHGEF17,ARHGEF25,ARMCX…
TF	Factor: Sp1; motif: NGGGGCGGGGN	TF:M07395	1.11214e-20	19.9538	9131	1355	744	21859	5730409E04RIK,9330182L06RIK,AASS,AATK,ABCG4,ABLIM2,ABLIM3,ACKR3,ACVRL1,ADAM11,ADAMTS18,ADAMTS4,ADAMTS7,ADAMTSL3,ADAMTSL4,ADARB1,ADCY5,ADGRA2,ADGRB2,ADGRG3,ADGRG6,ADGRL1,ADRA2B,ADRA2C,AEBP1,AGTR1A,AHRR,AK4,AKAP12,ALDH1A3,ALDH7A1,AMIGO1,AMOTL1,ANGPT1,ANGPTL2,ANKRD63,AOC3,AOX1,AP3B2,APBA1,APBB1,APC2,APH1C,APLN,ARHGAP20,ARHGAP23,ARHGEF17,ARHGEF25,ARMCX1,ARMCX3,ARMCX4,ARSI,ARTN,ASIC2,ASPHD2,ATP10A,ATP…
TF	Factor: RREB-1; motif: CCCCAAACMMCCCC	TF:M00257	4.83811e-20	19.3153	10733	1355	841	21859	5730409E04RIK,9330182L06RIK,9530077C05RIK,A4GALT,AATK,ABCA9,ABCC9,ABCG4,ABLIM3,ACKR1,ACKR3,ACVRL1,ADAMTS1,ADAMTS18,ADAMTSL1,ADAMTSL4,ADCY1,ADCY5,ADGRA2,ADGRB2,ADGRG3,ADGRG6,ADGRL1,ADRA2B,ADRA2C,AHI1,AHRR,AK4,ALDH1A3,ALDH7A1,AMIGO1,AMOTL1,ANK2,ANKRD34A,ANO2,ANTXR1,AOC3,AP3B2,APBA1,APLN,APLNR,APOL10B,APOL7C,APOLD1,ARHGAP20,ARHGAP23,ARHGAP6,ARHGEF15,ARHGEF17,ARHGEF25,ARHGEF9,ARMCX1,ARMCX3,ARMCX4,ARS…
TF	Factor: Sp5; motif: RNGGRGGNGGRGNNGGGGGAGGRG	TF:M10376	7.46187e-20	19.1272	4858	1355	454	21859	5730409E04RIK,6330403K07RIK,ABCG4,ACKR3,ADAM11,ADAMTS1,ADAMTS7,ADAMTSL4,ADCY5,ADGRE1,ADGRG3,ADGRG6,ADGRL1,AGTR1A,ALDH1A3,ALDH7A1,ANK1,ANXA1,AOAH,AOC3,APBB1,APLN,APOLD1,ARHGAP20,ARHGAP6,ARHGEF15,ARSI,ASTN1,ATP1A2,ATP2B3,ATP2B4,AXL,BCL6B,BEX2,BGN,BMP4,BOC,C1QTNF9,C1RL,CACNA1G,CACNA1H,CACNA2D3,CACNB1,CACNB2,CACNG4,CADM1,CADM3,CALB2,CAP2,CASQ1,CCDC136,CCDC141,CCDC3,CD248,CD99L2,CDC42EP3,CDH11,CDH2,CD…
TF	Factor: ZF5; motif: NRNGNGCGCGCWN; match class: 1	TF:M00333_1	7.7768e-20	19.1092	11192	1355	868	21859	6330403K07RIK,9330182L06RIK,A4GALT,ABCA9,ABCG4,ABLIM2,ABLIM3,ACKR3,ADAM11,ADAM22,ADAMTS1,ADAMTS18,ADAMTS7,ADAMTS8,ADAMTSL3,ADARB1,ADCY1,ADCY5,ADGRA2,ADGRB2,ADGRG6,ADGRL1,ADGRL4,ADRA2B,ADRA2C,AEBP1,AFAP1L2,AGTR1A,AHI1,AHRR,AK4,ALDH1A3,ALDH7A1,AMIGO1,AMOTL1,ANKRD34A,ANKRD63,ANTXR1,AP3B2,APBA1,APBB1,APC2,APH1C,APLN,APOD,APOL10B,ARHGAP20,ARHGAP44,ARHGAP6,ARHGEF17,ARHGEF25,ARMCX4,ART3,ASIC2,ASPHD2,AST…
TF	Factor: MAZ; motif: GGGGAGGG; match class: 1	TF:M00649_1	1.20081e-19	18.9205	3022	1355	317	21859	6330403K07RIK,ABCA8A,ABCC9,ACVRL1,ADAMTS18,ADAMTSL4,ADARB1,ADGRG3,ADGRL1,ADRA2C,AEBP1,ANK1,APBB1,APC2,ARHGAP20,ARHGAP23,ARHGEF25,ARHGEF9,ARMCX3,ARMCX4,ARSI,ASIC4,ASTN1,ATP1B2,ATP2B3,ATP2B4,AXL,B3GNT9,BBS1,BC034090,BEAN1,BGN,BNC2,BOC,BRSK1,C1RA,CACNA1G,CACNA1H,CACNA2D3,CACNB1,CACNG4,CADM1,CADM4,CALB2,CAR14,CASKIN1,CASQ1,CAV2,CCDC3,CCM2L,CDH2,CDH3,CELF6,CLEC14A,CLEC1A,CLMP,CMTM5,CNTN1,COL1A2,COL4A5…
TF	Factor: TFII-I; motif: RGAGGKAGG	TF:M00706	1.30958e-19	18.8829	5280	1355	483	21859	9330182L06RIK,AASS,ABCG4,ACKR4,ADAM11,ADAM22,ADAMTS18,ADAMTS4,ADAMTS7,ADAMTSL4,ADCY1,ADCY5,ADCYAP1R1,ADGRB2,ADGRG3,ADGRL1,ADRA2B,AEBP1,AFAP1L2,AGTR1A,ANK1,ANKRD34A,ANO2,ANTXR1,ANXA1,APBA1,APH1C,APLN,APLNR,ARHGAP44,ARHGEF25,ARMCX3,ARSI,ASPHD2,ATOH8,ATP2B3,ATP2B4,B3GALNT1,B4GALT2,BAG2,BBS1,BC034090,BEND6,BEX2,BGN,BMP4,C1QTNF3,C1QTNF9,C1RA,CACNB1,CACNG4,CADM1,CADM4,CAMK1G,CAR14,CASKIN1,CASP12,CAV2,C…
TF	Factor: CPBP; motif: SNCCCNN; match class: 1	TF:M01822_1	1.53778e-19	18.8131	19948	1355	1322	21859	5730409E04RIK,6330403K07RIK,9330159F19RIK,9330182L06RIK,9530077C05RIK,A4GALT,A930004D18RIK,AASS,AATK,ABCA8A,ABCA9,ABCC9,ABCG4,ABLIM2,ABLIM3,ACKR1,ACKR3,ACKR4,ACTA2,ACTG2,ACVRL1,ADAM11,ADAM22,ADAMDEC1,ADAMTS1,ADAMTS18,ADAMTS4,ADAMTS7,ADAMTS8,ADAMTSL1,ADAMTSL3,ADAMTSL4,ADARB1,ADCY1,ADCY5,ADCYAP1,ADCYAP1R1,ADGRA2,ADGRB2,ADGRE1,ADGRG3,ADGRG6,ADGRL1,ADGRL4,ADRA2B,ADRA2C,AEBP1,AFAP1L2,AGTR1A,AHI1,AHRR,…
TF	Factor: E2F-1; motif: GNGGGCGGGRMN; match class: 1	TF:M10209_1	1.89114e-19	18.7233	10609	1355	831	21859	9330182L06RIK,A4GALT,AASS,ABCG4,ABLIM2,ABLIM3,ACVRL1,ADAM11,ADAM22,ADAMTS18,ADAMTS4,ADAMTS7,ADAMTSL3,ADAMTSL4,ADARB1,ADCY1,ADCY5,ADGRA2,ADGRB2,ADGRG3,ADGRG6,ADGRL1,ADRA2B,ADRA2C,AEBP1,AGTR1A,AHI1,AHRR,AK4,AKAP12,AKAP6,ALDH1A3,ALDH7A1,AMIGO1,AMOTL1,ANGPTL2,ANK1,ANKRD63,AOC3,AP3B2,APBA1,APBB1,APC2,APH1C,APLN,ARHGAP20,ARHGAP23,ARHGAP6,ARHGEF17,ARHGEF25,ARMCX1,ARMCX3,ARSI,ARTN,ASIC2,ATL1,ATOH8,ATP10A…
TF	Factor: GKLF; motif: CCTCCYN; match class: 1	TF:M01835_1	2.75728e-19	18.5595	9539	1355	764	21859	6330403K07RIK,9330182L06RIK,A4GALT,A930004D18RIK,AASS,ABCC9,ABCG4,ABLIM2,ABLIM3,ACTG2,ADAM11,ADAM22,ADAMTS18,ADAMTS4,ADAMTS7,ADAMTS8,ADAMTSL3,ADAMTSL4,ADARB1,ADCY1,ADCY5,ADCYAP1,ADCYAP1R1,ADGRA2,ADGRE1,ADGRL1,ADRA2B,ADRA2C,AEBP1,AFAP1L2,AGTR1A,AHI1,AHRR,ALDH1A3,ALDH7A1,AMIGO1,ANKRD34A,ANKRD63,ANO2,ANTXR1,ANXA1,AOX1,APBA1,APBB1,APLN,APLNR,APOL10B,ARHGAP20,ARHGAP44,ARHGAP6,ARHGEF15,ARHGEF17,ARHGEF2…
TF	Factor: Plagl1; motif: NNNGGGGSSCCCCNNN	TF:M02786	2.99112e-19	18.5242	2002	1355	234	21859	A4GALT,ADAMTS1,ADAMTS7,ADCY1,ADCY5,ADGRA2,ADGRL1,ADRA2C,AFAP1L2,AMOTL1,ANGPTL2,ANKRD63,AOC3,APBA1,ARHGAP23,ARHGEF25,ASTN2,ATP1B2,BBS7,BEX2,BMPER,BNC2,BRSK2,CACNA1G,CACNA2D3,CADM1,CADM3,CBLN2,CD109,CDH3,CERS1,CLIP4,COL8A2,COLEC12,CPEB1,CREG2,CRISPLD2,CTXN1,CYS1,DENND2A,DOC2B,DPP6,DSEL,DZANK1,EBF4,EDIL3,EHD2,ELAVL3,ENO2,FAM19A5,FAM212B,FAXC,FBLN5,FGD1,FGF18,FGFR1,FIBCD1,FJX1,FNDC1,FREM2,FRMD6,FSTL5…
TF	Factor: FKLF; motif: BGGGNGGVMD	TF:M01837	1.02951e-18	17.9874	4975	1355	458	21859	5730409E04RIK,6330403K07RIK,A4GALT,ACKR4,ADAM11,ADAMTS18,ADAMTS7,ADAMTSL4,ADCY1,ADCYAP1,ADGRA2,ADGRG6,ADGRL1,ADRA2B,ADRA2C,ANKRD34A,ANO2,ANTXR1,AP3B2,APBA1,APBB1,APLNR,ARHGAP20,ARHGAP23,ARHGAP6,ARHGEF15,ARHGEF25,ARMCX1,ASIC4,ASPHD2,ASTN1,ATP2B3,ATP2B4,AXL,B3GALNT1,B4GALT2,BC034090,BEND6,BMPER,BNC2,BOC,BRSK2,C1RA,C3AR1,CACNA1H,CACNA2D3,CACNB1,CACNB2,CACNG4,CADM4,CADPS,CALB2,CALD1,CAP2,CAR14,CASQ1,…
TF	Factor: AP-2; motif: GSCCSCRGGCNRNRNN	TF:M00800	1.11628e-18	17.9522	6730	1355	579	21859	9530077C05RIK,A4GALT,ABCA9,ABLIM2,ABLIM3,ACTG2,ADAM22,ADAMTS1,ADAMTS18,ADAMTS7,ADAMTS8,ADAMTSL3,ADAMTSL4,ADARB1,ADCY1,ADCY5,ADGRA2,ADGRB2,ADGRF5,ADGRG3,ADGRG6,ADGRL1,ADGRL4,ADRA2B,ADRA2C,AFAP1L2,AHI1,AKAP6,AMIGO1,AMOTL1,ANGPTL2,ANO2,APBA1,APBB1,APH1C,APOL7C,ARHGAP23,ARHGAP44,ARHGAP6,ARHGEF17,ARMCX3,ARMCX4,ARSI,ARTN,ASIC2,ASTN2,ATL1,ATP10A,ATP1B2,ATP2B3,AXL,B3GALNT1,B4GALT2,BAG2,BEND6,BNC2,BOC,BRS…
TF	Factor: Osx; motif: CCNCCCCCNNN	TF:M07329	1.78078e-18	17.7494	6167	1355	540	21859	6330403K07RIK,9330182L06RIK,ABCG4,ACKR3,ACVRL1,ADAM11,ADAMTS7,ADAMTSL4,ADARB1,ADCY5,ADGRG3,ADGRG6,ADGRL1,AFAP1L2,AHI1,AK4,ALDH7A1,AMIGO1,ANKRD34A,ANTXR1,AOC3,APBB1,APH1C,ARHGAP23,ARHGAP6,ARHGEF15,ARHGEF17,ARHGEF25,ARMCX1,ARMCX4,ARSI,ASIC2,ASPHD2,ASTN1,ASTN2,ATP1B2,ATP2B4,AXL,B3GNT9,BAG2,BBS7,BC034090,BCL6B,BEX2,BRSK1,BRSK2,BVES,C1QTNF9,C5AR1,CACNA1B,CACNA1H,CACNB1,CACNB2,CACNG4,CADM1,CADM3,CADM4,…
TF	Factor: ZF5; motif: GYCGCGCARNGCNN; match class: 1	TF:M02933_1	3.90867e-18	17.408	5823	1355	515	21859	6330403K07RIK,A4GALT,ABLIM2,ADAMTS1,ADAMTS7,ADAMTS8,ADAMTSL3,ADARB1,ADCY1,ADCY5,ADGRA2,ADGRG6,ADGRL1,ADRA2B,ADRA2C,AHI1,AMIGO1,AMOTL1,ANKRD63,ANTXR1,AP3B2,APBA1,APBB1,ARHGAP20,ARHGAP44,ARHGEF17,ARMCX4,ASIC2,ATL1,ATOH8,ATP10A,ATP1B2,ATP2B4,B3GNT9,B4GALT2,BAG2,BEAN1,BEND6,BEX2,BMPER,BNC2,BOC,BRSK2,BVES,CACNA1B,CACNA1H,CACNA2D3,CACNG4,CADM1,CADM4,CADPS,CALB2,CASKIN1,CBLN2,CCDC3,CD109,CDC42EP3,CDH11,…
TF	Factor: GKLF; motif: CCTCCYN	TF:M01835	4.82956e-18	17.3161	16061	1355	1137	21859	5730409E04RIK,6330403K07RIK,9330182L06RIK,A4GALT,A930004D18RIK,AASS,ABCA9,ABCC9,ABCG4,ABLIM2,ABLIM3,ACKR3,ACKR4,ACTA2,ACTG2,ADAM11,ADAM22,ADAMDEC1,ADAMTS1,ADAMTS18,ADAMTS4,ADAMTS7,ADAMTS8,ADAMTSL3,ADAMTSL4,ADARB1,ADCY1,ADCY5,ADCYAP1,ADCYAP1R1,ADGRA2,ADGRB2,ADGRE1,ADGRG3,ADGRL1,ADRA2B,ADRA2C,AEBP1,AFAP1L2,AGTR1A,AHI1,AHRR,AKAP6,ALDH1A3,ALDH7A1,AMIGO1,ANGPTL1,ANGPTL2,ANK1,ANKRD34A,ANKRD63,ANO2,ANTX…
[truncated: 321 more rows]

## Sheet: C002
source	term_name	term_id	adjusted_p_value	negative_log10_of_adjusted_p_value	term_size	query_size	intersection_size	effective_domain_size	intersections
[truncated: 581 more rows]

[truncated: 40 more sheets: C003, C004, C005, C006, C007, C008, C009, C012, C013, C014, C015, C016, C017, C018, C019, C021, C022, C023, C025, C026 …]
